# Supplementary material for: Direct reprogramming of human smooth muscle and vascular endothelial cells reveals defects associated with aging and Hutchinson-Gilford progeria syndrome
Source: eLife. 2020 Sep 8;9:e54383. doi: 10.7554/eLife.54383 (PMC7478891; doi:10.7554/eLife.54383)
Supplement: Figure 1—source data 1. [file elife-54383-fig1-data1.xlsx]

## Sheet: Instruction
Instruction:
All iVEC analyses were performed using DESeq2 with DE cutoff of logFC 1, FDR (BH adjusted-pvalue) 0.05
All iSM analyses were performed using edgeR with DE cutoff logFC 1, FDR (BH adjusted p-value) 0.05
young_vs_old_DESeq2_iVEC DE genes were presented in Fig.2B heatmap
endo_vs_fibro_DESeq2_iVEC_cl DE genes were used as signature genes identified to distinguish between endothelial cells and firbroblasts cells. They were used for clustering analysis, shown in Fig. 1I
young_vs_old_edgeR_iSM DE genes were presented in Fig. 2A heatmap
fibro_vs_GEOsmooth_edgeR_iSM_cl DE genes were used as signature genes identified to distinguish between fibroblasts cells and smooth muscle cells (from GEO published data). They were used for clustering analysis, shown in Fig. 1G
HGPS_vs_normal_edgeR_iSM DE genes were presented in Fig. 3A heatmap

## Sheet: young_vs_old_DESeq2_iVEC
	baseMean	log2FoldChange	lfcSE	stat	pvalue	padj	GeneID	Symbol
GSTM1|GST1|GSTM1-1|GSTM1a-1a|GSTM1b-1b|GTH4|GTM1|H-B|MU|MU-1|-|1p13.3|protein-coding	148.205	-7.45301	0.696574	-10.6995	1.02301e-26	1.82883e-22	2944	GSTM1
NETO1|BCTL1|BTCL1|-|18q22.3|protein-coding	644.631	1.53524	0.196197	7.82498	5.0773e-15	4.53834e-11	81832	NETO1
LOC284581|-|-|1q32.1|ncRNA	18.1286	-5.13196	0.979408	-5.23986	1.60699e-07	0.000718202	284581	LOC284581
C8orf58|-|-|8p21.3|protein-coding	386.77	-0.784058	0.148246	-5.28889	1.23064e-07	0.000718202	541565	C8orf58
DNAJC6|DJC6|PARK19|-|1p31.3|protein-coding	188.671	-1.88002	0.366675	-5.12721	2.94064e-07	0.0010514	9829	DNAJC6
SLC14A1|HUT11|HsT1341|JK|RACH1|RACH2|UT-B1|UT1|UTE|-|18q12.3|protein-coding	361.692	2.65029	0.52067	5.09015	3.57779e-07	0.001066	6563	SLC14A1
HLA-DPB1|DPB1|HLA-DP|HLA-DP1B|HLA-DPB|-|6p21.32|protein-coding	91.9303	-1.29896	0.281955	-4.60697	4.08582e-06	0.0104346	3115	HLA-DPB1
F10|FX|FXA|-|13q34|protein-coding	70.2237	-1.85561	0.427765	-4.33792	1.43837e-05	0.0285709	2159	F10
PALD1|KIAA1274|PALD|-|10q22.1|protein-coding	120.328	-1.5675	0.36105	-4.34152	1.41503e-05	0.0285709	27143	PALD1
TCEAL7|MPMGp800C04260Q003|WEX5|-|Xq22.2|protein-coding	52.4799	1.35652	0.32359	4.19209	2.76391e-05	0.0494104	56849	TCEAL7
CD40|Bp50|CDW40|TNFRSF5|p50|-|20q13.12|protein-coding	178.229	-0.917906	0.222979	-4.11656	3.84573e-05	0.0625002	958	CD40
ADAMTS2|ADAM-TS2|ADAMTS-2|ADAMTS-3|NPI|PC I-NP|PCI-NP|PCINP|PCPNI|PNPI|-|5q35.3|protein-coding	2828.3	-0.7538	0.184665	-4.08199	4.46516e-05	0.0665198	9509	ADAMTS2
CPNE8|-|-|12q12|protein-coding	197.363	-1.24364	0.310642	-4.00346	6.24231e-05	0.0858413	144402	CPNE8
GPX3|GPx-P|GSHPx-3|GSHPx-P|-|5q33.1|protein-coding	271.046	-1.08999	0.275323	-3.95897	7.5275e-05	0.0961209	2878	GPX3
LDOC1|BCUR1|Mar7|Mart7|-|Xq27.1|protein-coding	397.284	-0.605034	0.153655	-3.93761	8.22983e-05	0.0980831	23641	LDOC1
TSPAN18|TSPAN|-|11p11.2|protein-coding	14.6738	-2.79397	0.725373	-3.85177	0.000117268	0.131025	90139	TSPAN18
CACNA1C|CACH2|CACN2|CACNL1A1|CCHL1A1|CaV1.2|LQT8|TS|-|12p13.33|protein-coding	235.284	-0.907384	0.239023	-3.79622	0.000146921	0.154501	775	CACNA1C
GBX2|-|-|2q37.2|protein-coding	62.6428	-3.16903	0.850314	-3.72689	0.00019386	0.192535	2637	GBX2
SYNPO2|-|-|4q26|protein-coding	115.432	-1.48413	0.400664	-3.70417	0.00021208	0.199545	171024	SYNPO2
MAP4K4|FLH21957|HEL-S-31|HGK|MEKKK4|NIK|-|2q11.2|protein-coding	14740.3	0.25937	0.0708914	3.6587	0.000253498	0.226589	9448	MAP4K4
ZNF702P|ZNF702|-|19q13.41|pseudo	156.955	-1.53721	0.42293	-3.63468	0.00027833	0.236938	79986	ZNF702P
LMO7-AS1|UCHL3-AS1|-|13q22.2|ncRNA	23.5028	-3.85939	1.06587	-3.6209	0.000293584	0.238564	101927155	LMO7-AS1
TP53I11|PIG11|-|11p11.2|protein-coding	81.9803	-1.08037	0.300775	-3.59194	0.000328222	0.243895	9537	TP53I11
TNC|150-225|DFNA56|GMEM|GP|HXB|JI|TN|TN-C|-|9q33.1|protein-coding	712.647	-0.687543	0.191015	-3.59942	0.000318928	0.243895	3371	TNC
ATP7B|PWD|WC1|WD|WND|-|13q14.3|protein-coding	135.078	-1.16119	0.324181	-3.58192	0.000341074	0.243895	540	ATP7B
PRSS3|MTG|PRSS4|T9|TRY3|TRY4|-|9p13.3|protein-coding	160.937	1.41507	0.397106	3.56346	0.000366004	0.251656	5646	PRSS3
ARHGAP45|HA-1|HLA-HA1|HMHA1|-|19p13.3|protein-coding	153.913	-0.778904	0.220548	-3.53167	0.000412948	0.273417	23526	ARHGAP45
KCNK2|K2p2.1|TPKC1|TREK|TREK-1|TREK1|hTREK-1c|hTREK-1e|-|1q41|protein-coding	1237.11	0.890106	0.256385	3.47176	0.000517068	0.330129	3776	KCNK2
APCDD1L|-|-|20q13.32|protein-coding	94.1575	2.12305	0.616806	3.44201	0.0005774	0.355937	164284	APCDD1L
GSTM4|GSTM4-4|GTM4|-|1p13.3|protein-coding	174.601	-0.927278	0.272604	-3.40155	0.000670037	0.399275	2948	GSTM4
CRTAC1|ASPIC|ASPIC1|CEP-68|-|10q24.2|protein-coding	89.5283	-1.34645	0.397341	-3.38865	0.000702383	0.399474	55118	CRTAC1
OTOGL|C12orf64|DFNB84B|-|12q21.31|protein-coding	117.611	-0.726353	0.21466	-3.38374	0.000715063	0.399474	283310	OTOGL
RRP7BP|RRP7B|dJ222E13.2|-|22q13.2|pseudo	166.94	1.7806	0.533131	3.33989	0.000838108	0.454026	91695	RRP7BP
PKIA|PRKACN1|-|8q21.13|protein-coding	311.339	1.03334	0.31176	3.31454	0.000917932	0.479214	5569	PKIA
CYTOR|C2orf59|LINC00152|NCRNA00152|-|2p11.2|ncRNA	1139.53	-0.84324	0.255486	-3.30053	0.000965022	0.479214	112597	CYTOR
NEO1|IGDCC2|NGN|NTN1R2|-|15q24.1|protein-coding	213.637	0.972413	0.294174	3.30557	0.000947849	0.479214	4756	NEO1
NTPCR|C1orf57|HCR-NTPase|-|1q42.2|protein-coding	353.801	0.589293	0.179371	3.28533	0.00101861	0.492156	84284	NTPCR
STC2|STC-2|STCRP|-|5q35.2|protein-coding	3080.94	-1.11966	0.345382	-3.2418	0.00118777	0.50716	8614	STC2
TCAIM|C3orf23|TOAG-1|TOAG1|-|3p21.31|protein-coding	386.577	-0.463249	0.142381	-3.25358	0.00113961	0.50716	285343	TCAIM
SOD3|EC-SOD|-|4p15.2|protein-coding	25.6884	-1.63481	0.500896	-3.26378	0.00109937	0.50716	6649	SOD3
CCDC66|-|-|3p14.3|protein-coding	281.664	0.465184	0.143535	3.2409	0.00119152	0.50716	285331	CCDC66
SHC3|N-Shc|NSHC|RAI|SHCC|-|9q22.1|protein-coding	24.238	1.79957	0.552757	3.25563	0.00113142	0.50716	53358	SHC3
PEX5L|PEX5R|PEX5RP|PXR2|PXR2B|TRIP8b|-|3q26.33|protein-coding	6.30624	5.119	1.58487	3.22991	0.00123831	0.514819	51555	PEX5L
CD55|CR|CROM|DAF|TC|-|1q32.2|protein-coding	803.296	0.435638	0.135739	3.20939	0.00133016	0.540437	1604	CD55
MRVI1|IRAG|JAW1L|-|11p15.4|protein-coding	166.883	-0.941053	0.29403	-3.20053	0.00137175	0.544952	10335	MRVI1
GPAT2|CT123|-|2q11.2|protein-coding	86.1154	1.66184	0.520445	3.19312	0.00140746	0.54698	150763	GPAT2
NAMPT|1110035O14Rik|PBEF|PBEF1|VF|VISFATIN|-|7q22.3|protein-coding	1834.42	-0.448313	0.142092	-3.15509	0.00160451	0.575783	10135	NAMPT
ACOX3|-|-|4p16.1|protein-coding	421.026	-0.746866	0.236798	-3.15402	0.0016104	0.575783	8310	ACOX3
RHOD|ARHD|RHOHP1|RHOM|Rho|-|11q13.2|protein-coding	25.3563	-1.5578	0.493024	-3.15968	0.00157941	0.575783	29984	RHOD
DENND3|-|-|8q24.3|protein-coding	1061.45	-0.469664	0.148491	-3.1629	0.00156205	0.575783	22898	DENND3
NES|Nbla00170|-|1q23.1|protein-coding	3296.31	-0.717637	0.23292	-3.08104	0.00206278	0.723065	10763	NES
ZNF704|Gig1|-|8q21.13|protein-coding	160.904	-1.32187	0.435152	-3.03773	0.00238369	0.741312	619279	ZNF704
C1orf198|-|-|1q42.2|protein-coding	1226.47	-0.48317	0.159174	-3.03548	0.00240152	0.741312	84886	C1orf198
TRANK1|LBA1|-|3p22.2|protein-coding	179.25	-0.722873	0.239249	-3.02143	0.00251586	0.741312	9881	TRANK1
HTATIP2|CC3|SDR44U1|TIP30|-|11p15.1|protein-coding	841.743	-0.547484	0.181351	-3.01893	0.00253673	0.741312	10553	HTATIP2
PHGDH|3-PGDH|3PGDH|HEL-S-113|NLS|NLS1|PDG|PGAD|PGD|PGDH|PHGDHD|SERA|-|1p12|protein-coding	567.052	0.593186	0.196886	3.01284	0.0025882	0.741312	26227	PHGDH
TNFRSF10C|CD263|DCR1|DCR1-TNFR|LIT|TRAIL-R3|TRAILR3|TRID|-|8p21.3|protein-coding	684.152	-0.979229	0.323094	-3.03078	0.00243921	0.741312	8794	TNFRSF10C
SERPINB9|CAP-3|CAP3|PI-9|PI9|-|6p25.2|protein-coding	372.17	-0.682034	0.223907	-3.04605	0.00231868	0.741312	5272	SERPINB9
HSPB7|cvHSP|-|1p36.13|protein-coding	141.57	-2.05678	0.670594	-3.0671	0.00216148	0.741312	27129	HSPB7
VWA1|WARP|-|1p36.33|protein-coding	23.024	-1.38094	0.458784	-3.01	0.00261244	0.741312	64856	VWA1
CABLES1|CABL1|CABLES|HsT2563|IK3-1|-|18q11.2|protein-coding	920.781	-0.613591	0.200819	-3.05545	0.00224726	0.741312	91768	CABLES1
GPC4|K-glypican|-|Xq26.2|protein-coding	39.8573	-1.32222	0.434594	-3.04243	0.00234679	0.741312	2239	GPC4
LOC254896|-|-|8p21.3|ncRNA	64.2088	-0.96656	0.319153	-3.02851	0.0024576	0.741312	254896	LOC254896
HSPB3|DHMN2C|HMN2C|HSPL27|-|5q11.2|protein-coding	27.706	-2.36283	0.788505	-2.99659	0.00273019	0.762619	8988	HSPB3
GIPC3|C19orf64|DFNB15|DFNB72|DFNB95|-|19p13.3|protein-coding	71.6832	-1.11269	0.375552	-2.96281	0.00304841	0.825703	126326	GIPC3
B4GALNT1|GALGT|GALNACT|GalNAc-T|SPG26|-|12q13.3|protein-coding	54.8068	-1.37714	0.464459	-2.96503	0.00302655	0.825703	2583	B4GALNT1
COL21A1|COLA1L|FP633|-|6p12.1|6p12.3-p11.2|protein-coding	1041.19	-0.939023	0.317973	-2.95316	0.00314543	0.837152	81578	COL21A1
FAM47E-STBD1|-|-|4q21.1|protein-coding	165.354	-0.76402	0.259046	-2.94936	0.00318433	0.837152	100631383	FAM47E-STBD1
LOC100505797|-|-|18q22.3|ncRNA	8.11923	3.175	1.07908	2.94231	0.00325771	0.844029	100505797	LOC100505797
LRRC3|C21orf102|-|21q22.3|protein-coding	64.0082	-1.08467	0.370822	-2.92505	0.00344396	0.869345	81543	LRRC3
STBD1|GENEX3414|GENX-3414|-|4q21.1|protein-coding	170.114	-0.749254	0.256219	-2.92427	0.00345268	0.869345	8987	STBD1
IVD|ACAD2|-|15q15.1|protein-coding	1437.56	-0.363755	0.12461	-2.91915	0.0035099	0.87148	3712	IVD
PCYOX1L|-|-|5q32|protein-coding	281.063	-0.784866	0.270178	-2.905	0.0036725	0.873243	78991	PCYOX1L
FMNL2|FHOD2|-|2q23.3|protein-coding	1212.32	0.281137	0.0968897	2.90162	0.0037124	0.873243	114793	FMNL2
ECHDC3|-|-|10p14|protein-coding	71.705	0.971004	0.334401	2.90371	0.00368767	0.873243	79746	ECHDC3
PEG10|EDR|HB-1|MEF3L|Mar2|Mart2|RGAG3|-|7q21.3|protein-coding	1261.62	1.11991	0.385622	2.90416	0.00368239	0.873243	23089	PEG10
NOTCH2NL|N2N|-|1q21.1|protein-coding	289.948	0.591045	0.205081	2.882	0.00395158	0.874446	388677	NOTCH2NL
LEPR|CD295|LEP-R|LEPRD|OB-R|OBR|-|1p31.3|protein-coding	557.661	-0.550301	0.190291	-2.89189	0.0038293	0.874446	3953	LEPR
S100A10|42C|ANX2L|ANX2LG|CAL1L|CLP11|Ca[1]|GP11|P11|p10|-|1q21.3|protein-coding	4338.19	0.369931	0.128396	2.88117	0.00396208	0.874446	6281	S100A10
LSP1|WP34|pp52|-|11p15.5|protein-coding	7.28915	3.80997	1.31891	2.88874	0.00386794	0.874446	4046	LSP1
TYW1B|LINC00069|NCRNA00069|RSAFD2|-|7q11.22-q11.23|protein-coding	41.273	-2.01156	0.697211	-2.88516	0.00391218	0.874446	441250	TYW1B
TM4SF18|L6D|-|3q25.1|protein-coding	912.211	-0.681239	0.237948	-2.86297	0.00419685	0.901611	116441	TM4SF18
MAPRE2|CSCSC2|EB1|EB2|RP1|-|18q12.1-q12.2|protein-coding	2208.75	-0.630696	0.220048	-2.86618	0.00415458	0.901611	10982	MAPRE2
ADGRL4|ELTD1|ETL|KPG_003|-|1p31.1|protein-coding	1911.31	0.56537	0.197682	2.86	0.00423647	0.901611	64123	ADGRL4
CSF3|C17orf33|CSF3OS|GCSF|-|17q21.1|protein-coding	27.4716	1.9343	0.677964	2.8531	0.00432955	0.910582	1440	CSF3
ODF2L|dJ977L11.1|-|1p22.3|protein-coding	382.759	0.44837	0.157945	2.83878	0.00452866	0.941381	57489	ODF2L
IFI30|GILT|IFI-30|IP-30|IP30|-|19p13.11|protein-coding	65.1923	-0.984775	0.347818	-2.8313	0.00463599	0.946943	10437	IFI30
SNHG5|C6orf160|LINC00044|NCRNA00044|U50HG|bA33E24.2|-|6q14.3|ncRNA	1127.28	-2.40584	0.851342	-2.82593	0.00471432	0.946943	387066	SNHG5
NEURL1|NEUR1|NEURL|RNF67|bA416N2.1|neu|neu-1|-|10q24.33|protein-coding	19.4778	1.82975	0.646724	2.82925	0.00466566	0.946943	9148	NEURL1
CENPQ|C6orf139|CENP-Q|-|6p12.3|protein-coding	246.642	0.742704	0.264072	2.81251	0.00491567	0.976416	55166	CENPQ
IFI44L|C1orf29|GS3686|-|1p31.1|protein-coding	19.6576	1.71038	0.609549	2.80597	0.00501647	0.977567	10964	IFI44L
ID3|HEIR-1|bHLHb25|-|1p36.12|protein-coding	1841.68	-0.618365	0.220447	-2.80505	0.00503083	0.977567	3399	ID3
LINC00882|-|-|3q13.12|ncRNA	252.451	-0.503157	0.179608	-2.80142	0.00508789	0.978024	100302640	LINC00882
S100A4|18A2|42A|CAPL|FSP1|MTS1|P9KA|PEL98|-|1q21.3|protein-coding	1903.97	-0.130903	0.192972	-0.67835	0.49755	0.999987	6275	S100A4
ZBTB11-AS1|-|-|3q12.3|ncRNA	82.116	-0.168051	0.255246	-0.658388	0.510289	0.999987	100009676	ZBTB11-AS1
FCHSD2|NWK|SH3MD3|-|11q13.4|protein-coding	757.649	-0.229553	0.192112	-1.19489	0.232129	0.999987	9873	FCHSD2
E2F5|E2F-5|-|8q21.2|protein-coding	14.5774	0.30392	0.765577	0.396982	0.691381	0.999987	1875	E2F5
LCE1F|LEP6|-|1q21.3|protein-coding	0.843944	0.559016	3.55902	0.15707	0.875189	0.999987	353137	LCE1F
AKR1A1|ALDR1|ALR|ARM|DD3|HEL-S-6|-|1p34.1|protein-coding	1233.84	0.0492444	0.13811	0.35656	0.721421	0.999987	10327	AKR1A1
AXDND1|C1orf125|-|1q25.2|protein-coding	0.806659	-0.535083	2.41025	-0.222003	0.824312	0.999987	126859	AXDND1
SNAPIN|BLOC1S7|BLOS7|BORCS3|SNAPAP|-|1q21.3|protein-coding	476.501	0.00736816	0.116956	0.0629995	0.949767	0.999987	23557	SNAPIN
DNAJC27|RBJ|RabJS|-|2p23.3|protein-coding	91.4883	-0.0760311	0.235229	-0.323221	0.746528	0.999987	51277	DNAJC27
PVRL3-AS1|-|-|3q13.13|ncRNA	5.1423	-0.0355567	0.930126	-0.0382278	0.969506	0.999987	100506555	PVRL3-AS1
RBM14-RBM4|COAZ|-|11q13.2|protein-coding	960.802	-0.0254484	0.128281	-0.198381	0.842747	0.999987	100526737	RBM14-RBM4
SLC35A4|-|-|5q31.3|protein-coding	1404.69	0.0909943	0.103125	0.882373	0.377575	0.999987	113829	SLC35A4
RIBC2|C22orf11|TRIB|-|22q13.31|protein-coding	31.9599	0.468542	0.436109	1.07437	0.282657	0.999987	26150	RIBC2
ZNF296|ZFP296|ZNF342|-|19q13.32|protein-coding	10.0327	0.394363	0.797217	0.494674	0.62083	0.999987	162979	ZNF296
MRAS|M-RAs|R-RAS3|RRAS3|-|3q22.3|protein-coding	656.22	-0.31609	0.219679	-1.43887	0.150188	0.999987	22808	MRAS
LTF|GIG12|HEL110|HLF2|LF|-|3p21.31|protein-coding	0.488311	-0.851754	3.25051	-0.262037	0.793293	0.999987	4057	LTF
OSBPL2|DFNA67|DNFA67|ORP-2|ORP2|-|20q13.33|protein-coding	512.659	-0.132982	0.155435	-0.855544	0.39225	0.999987	9885	OSBPL2
PIGM|GPI-MT-I|-|1q23.2|protein-coding	253.486	-0.0990478	0.151812	-0.652439	0.514118	0.999987	93183	PIGM
AES|AES-1|AES-2|ESP1|GRG|GRG5|Grg-5|TLE5|-|19p13.3|protein-coding	4146.79	-0.10417	0.163732	-0.636223	0.524631	0.999987	166	AES
CEP126|KIAA1377|-|11q22.1|protein-coding	50.6981	-0.193148	0.36447	-0.529941	0.596153	0.999987	57562	CEP126
TTC30A|IFT70A|-|2q31.2|protein-coding	75.3742	0.0142857	0.282133	0.0506347	0.959617	0.999987	92104	TTC30A
ELAC1|D29|-|18q21.2|protein-coding	171.588	-0.0953143	0.208638	-0.456842	0.647785	0.999987	55520	ELAC1
CA5B|CA-VB|-|Xp22.2|protein-coding	109.706	-0.205139	0.244024	-0.840651	0.400543	0.999987	11238	CA5B
RUBCN|KIAA0226|RUBICON|SCAR15|-|3q29|protein-coding	516.375	0.0255419	0.127842	0.199792	0.841644	0.999987	9711	RUBCN
INTS6L-AS1|DDX26B-AS1|-|Xq26.3|ncRNA	0.814002	-1.85109	2.78896	-0.663721	0.506869	0.999987	100874118	INTS6L-AS1
CD163|M130|MM130|SCARI1|-|12p13.31|protein-coding	123.805	0.442709	0.542954	0.815371	0.41486	0.999987	9332	CD163
HSD17B1|17-beta-HSD|20-alpha-HSD|E2DH|EDH17B2|EDHB17|HSD17|SDR28C1|-|17q21.2|protein-coding	9.46631	0.270122	0.719858	0.375243	0.70748	0.999987	3292	HSD17B1
INO80B|HMGA1L4|HMGIYL4|IES2|PAP-1BP|PAPA-1|PAPA1|ZNHIT4|hIes2|-|2p13.1|protein-coding	191.028	0.0745667	0.174559	0.427172	0.669254	0.999987	83444	INO80B
DENND1A|FAM31A|KIAA1608|-|9q33.3|protein-coding	374.982	0.200873	0.186719	1.0758	0.282016	0.999987	57706	DENND1A
ZDHHC12|DHHC-12|ZNF400|-|9q34.11|protein-coding	371.099	-0.0203794	0.178082	-0.114438	0.90889	0.999987	84885	ZDHHC12
FUT8|-|-|14q23.3|protein-coding	1029.72	0.0998079	0.1735	0.575263	0.565114	0.999987	2530	FUT8
TBC1D10C|CARABIN|EPI64C|-|11q13.2|protein-coding	1.48913	-0.974965	1.97902	-0.49265	0.62226	0.999987	374403	TBC1D10C
RIPPLY1|-|-|Xq22.3|protein-coding	0.333957	0.0322791	4.08047	0.00791063	0.993688	0.999987	92129	RIPPLY1
PCDHB14|PCDH-BETA14|-|5q31.3|protein-coding	6.66322	-0.232088	0.892282	-0.260106	0.794782	0.999987	56122	PCDHB14
OXSR1|OSR1|-|3p22.2|protein-coding	3150.32	-0.0842449	0.169922	-0.495787	0.620045	0.999987	9943	OXSR1
PPM1E|CaMKP-N|POPX1|PP2CH|caMKN|-|17q22|protein-coding	0.994527	0.971967	2.32067	0.41883	0.67534	0.999987	22843	PPM1E
PLCD1|NDNC3|PLC-III|-|3p22.2|protein-coding	348.758	-0.14728	0.191134	-0.77056	0.440968	0.999987	5333	PLCD1
FILIP1L|DOC-1|DOC1|GIP130|GIP90|-|3q12.1|protein-coding	3205.79	-0.122618	0.203148	-0.603587	0.546118	0.999987	11259	FILIP1L
ZFPL1|D11S750|MCG4|-|11q13.1|protein-coding	379.6	0.20947	0.134861	1.55322	0.12037	0.999987	7542	ZFPL1
CTPS1|CTPS|IMD24|-|1p34.2|protein-coding	2567.86	-0.0221726	0.18396	-0.12053	0.904063	0.999987	1503	CTPS1
RAVER2|-|-|1p31.3|protein-coding	89.8487	0.202744	0.347538	0.583373	0.559642	0.999987	55225	RAVER2
LAMA1|LAMA|PTBHS|S-LAM-alpha|-|18p11.31|protein-coding	184.501	0.572509	0.427968	1.33774	0.180982	0.999987	284217	LAMA1
MRPL45|L45mt|MRP-L45|-|17q12|protein-coding	691.545	0.150212	0.114809	1.30837	0.19075	0.999987	84311	MRPL45
TRERF1|BCAR2|HSA277276|RAPA|TREP132|TReP-132|dJ139D8.5|-|6p21.1|protein-coding	663.01	-0.0209883	0.162626	-0.129059	0.897311	0.999987	55809	TRERF1
TMEM231|ALYE870|JBTS20|MKS11|PRO1886|-|16q23.1|protein-coding	166.769	0.0133321	0.236838	0.0562921	0.955109	0.999987	79583	TMEM231
GPS1|COPS1|CSN1|SGN1|-|17q25.3|protein-coding	1454.6	-0.0565043	0.123951	-0.45586	0.64849	0.999987	2873	GPS1
HDGFRP2|HDGF-2|HDGF2|HRP-2|-|19p13.3|protein-coding	919.926	-0.0300758	0.107698	-0.279261	0.780044	0.999987	84717	HDGFRP2
RCC1|CHC1|RCC1-I|SNHG3-RCC1|-|1p35.3|protein-coding	1919.27	0.243031	0.145996	1.66464	0.0959842	0.999987	1104	RCC1
TMEM9B-AS1|C11orf18|-|11p15.4|ncRNA	9.47269	0.395603	0.671618	0.589029	0.555842	0.999987	493900	TMEM9B-AS1
LSM8|NAA38|-|7q31.31|protein-coding	598.461	0.212361	0.16573	1.28136	0.200066	0.999987	51691	LSM8
NUDT5|YSA1|YSA1H|YSAH1|hNUDT5|-|10p14|protein-coding	1427.01	0.0587548	0.144715	0.406005	0.684739	0.999987	11164	NUDT5
MIR3657|-|-|12q24.13|ncRNA	0.335331	0.0322791	4.08047	0.00791063	0.993688	0.999987	100500889	MIR3657
AURKC|AIE2|AIK3|ARK3|AurC|HEL-S-90|SPGF5|STK13|aurora-C|-|19q13.43|protein-coding	7.69195	-0.227588	0.745506	-0.30528	0.760153	0.999987	6795	AURKC
PAX5|ALL3|BSAP|-|9p13.2|protein-coding	0.816527	-3.13826	2.65288	-1.18296	0.236824	0.999987	5079	PAX5
ZNF579|-|-|19q13.42|protein-coding	82.8836	0.0409118	0.294601	0.138872	0.889551	0.999987	163033	ZNF579
RET|CDHF12|CDHR16|HSCR1|MEN2A|MEN2B|MTC1|PTC|RET-ELE1|RET51|-|10q11.21|protein-coding	2.51601	-0.563016	1.3069	-0.430804	0.666611	0.999987	5979	RET
CDKN1C|BWCR|BWS|KIP2|WBS|p57|p57Kip2|-|11p15.4|protein-coding	0.990956	1.04558	2.79865	0.373602	0.7087	0.999987	1028	CDKN1C
TUBA1B|K-ALPHA-1|-|12q13.12|protein-coding	18117.4	0.0363636	0.13961	0.260466	0.794504	0.999987	10376	TUBA1B
LINC00893|-|-|Xq28|ncRNA	4.37489	0.270086	1.18426	0.228064	0.819597	0.999987	100131434	LINC00893
NDUFB9|B22|CI-B22|LYRM3|UQOR22|-|8q24.13|protein-coding	1490.01	-0.0113424	0.117371	-0.0966372	0.923015	0.999987	4715	NDUFB9
IGFBP7|AGM|FSTL2|IBP-7|IGFBP-7|IGFBP-7v|IGFBPRP1|MAC25|PSF|RAMSVPS|TAF|-|4q12|protein-coding	3690.05	-0.68453	0.991906	-0.690116	0.490121	0.999987	3490	IGFBP7
TATDN3|-|-|1q32.3|protein-coding	210.347	0.0734823	0.199839	0.367707	0.713092	0.999987	128387	TATDN3
GTF2E2|FE|TF2E2|TFIIE-B|TTD6|-|8p12|protein-coding	875.065	0.119187	0.118774	1.00348	0.315629	0.999987	2961	GTF2E2
ANO2|C12orf3|TMEM16B|-|12p13.31|protein-coding	0.505517	0.919978	4.03853	0.2278	0.819801	0.999987	57101	ANO2
LINC01435|TCONS_00018040|-|10q25.1|ncRNA	7.04869	1.03524	0.840829	1.23122	0.218242	0.999987	103695365	LINC01435
TPCN1|TPC1|-|12q24.13|protein-coding	657.868	-0.346352	0.220223	-1.57274	0.11578	0.999987	53373	TPCN1
PTPN2|PTN2|PTPT|TC-PTP|TCELLPTP|TCPTP|-|18p11.21|protein-coding	404.821	0.196458	0.18962	1.03606	0.300174	0.999987	5771	PTPN2
CCNA1|CT146|-|13q13.3|protein-coding	1.46069	-0.295001	2.04323	-0.14438	0.885201	0.999987	8900	CCNA1
ZNF860|-|-|3p23-p22.3|protein-coding	34.8468	-0.681283	0.389338	-1.74985	0.0801442	0.999987	344787	ZNF860
ATP6V0D1|ATP6D|ATP6DV|P39|VATX|VMA6|VPATPD|-|16q22.1|protein-coding	1869.63	-0.0730008	0.156801	-0.465565	0.641527	0.999987	9114	ATP6V0D1
ZNF138|pHZ-32|-|7q11.21|protein-coding	123.96	0.0482921	0.235801	0.2048	0.837728	0.999987	7697	ZNF138
CCNA2|CCN1|CCNA|-|4q27|protein-coding	1596.67	0.197311	0.212444	0.928767	0.35301	0.999987	890	CCNA2
IDH1|HEL-216|HEL-S-26|IDCD|IDH|IDP|IDPC|PICD|-|2q34|protein-coding	3021.66	-0.139671	0.187739	-0.743964	0.456898	0.999987	3417	IDH1
BICD1|BICD|-|12p11.21|protein-coding	348.334	-0.0442317	0.163192	-0.27104	0.78636	0.999987	636	BICD1
TMEM14B|-|-|6p24.2|protein-coding	772.082	0.329353	0.138258	2.38217	0.017211	0.999987	81853	TMEM14B
KLHL13|BKLHD2|-|Xq24|protein-coding	18.2872	-1.01739e-05	0.604464	-1.68312e-05	0.999987	0.999987	90293	KLHL13
CSTB|CPI-B|CST6|EPM1|EPM1A|PME|STFB|ULD|-|21q22.3|protein-coding	3203.59	-0.101419	0.147487	-0.687648	0.491674	0.999987	1476	CSTB
RCAN3AS|-|-|1p36.11|ncRNA	0.335331	0.0322791	4.08047	0.00791063	0.993688	0.999987	100750325	RCAN3AS
SLC9A3|DIAR8|NHE-3|NHE3|-|5p15.33|protein-coding	13.8668	0.143534	0.650515	0.220646	0.825368	0.999987	6550	SLC9A3
PRMT9|PRMT10|-|4q31.23|protein-coding	308.259	-0.0144441	0.164673	-0.0877137	0.930104	0.999987	90826	PRMT9
TRIM61|RNF35|-|4q32.3|protein-coding	6.5769	0.267733	0.938793	0.285188	0.7755	0.999987	391712	TRIM61
LINC00667|-|-|18p11.31|ncRNA	632.832	-0.127406	0.369466	-0.344838	0.730217	0.999987	339290	LINC00667
DTX2|RNF58|-|7q11.23|protein-coding	150.483	0.00914078	0.200973	0.0454826	0.963723	0.999987	113878	DTX2
AATBC|-|-|21q22.3|ncRNA	0.346458	0.0322791	4.08047	0.00791063	0.993688	0.999987	284837	AATBC
ZYX|ESP-2|HED-2|-|7q34|protein-coding	8651.04	0.0304373	0.0887976	0.342772	0.73177	0.999987	7791	ZYX
TRIM9|RNF91|SPRING|-|14q22.1|protein-coding	0.488311	-0.851754	3.25051	-0.262037	0.793293	0.999987	114088	TRIM9
SNORA4|ACA4|-|3q27.3|snoRNA	36.018	0.219707	0.434436	0.505731	0.613046	0.999987	619568	SNORA4
PTGES2-AS1|-|-|9q34.11|ncRNA	0.342211	1.91147	4.03588	0.473618	0.635773	0.999987	389791	PTGES2-AS1
FAM13C|FAM13C1|-|10q21.1|protein-coding	0.661022	-1.44936	2.51884	-0.575407	0.565016	0.999987	220965	FAM13C
RAB8A|MEL|RAB8|-|19p13.11|protein-coding	1823.52	0.0534299	0.113097	0.472427	0.636622	0.999987	4218	RAB8A
PLAA|DOA1|PLA2P|PLAP|-|9p21.2|protein-coding	1493.03	0.0652009	0.106366	0.612989	0.539884	0.999987	9373	PLAA
CUL1|-|-|7q36.1|protein-coding	2154.15	0.0261087	0.103991	0.251066	0.801763	0.999987	8454	CUL1
MSANTD1|C4orf44|-|4p16.3|protein-coding	0.828811	0.563416	2.83942	0.198427	0.842711	0.999987	345222	MSANTD1
PAX8|-|-|2q14.1|protein-coding	50.7526	1.00056	0.874243	1.14449	0.252422	0.999987	7849	PAX8
TLX1|HOX11|TCL3|-|10q24.31|protein-coding	0.659076	-2.82772	3.66995	-0.770507	0.440999	0.999987	3195	TLX1
SLC9A3R2|E3KARP|NHE3RF2|NHERF-2|NHERF2|OCTS2|SIP-1|SIP1|TKA-1|-|16p13.3|protein-coding	993.242	-0.400281	0.242053	-1.65369	0.0981905	0.999987	9351	SLC9A3R2
FOXP4|hFKHLA|-|6p21.1|protein-coding	235.514	-0.0341884	0.247263	-0.138267	0.890029	0.999987	116113	FOXP4
EXTL2|EXTR2|-|1p21.2|protein-coding	742.998	0.209189	0.182069	1.14895	0.250576	0.999987	2135	EXTL2
ZNF787|TIP20|-|19q13.43|protein-coding	229.758	0.00203744	0.203098	0.0100318	0.991996	0.999987	126208	ZNF787
ASH1L|ASH1|ASH1L1|KMT2H|-|1q22|protein-coding	1665.19	-0.0858875	0.0922262	-0.93127	0.351714	0.999987	55870	ASH1L
CACFD1|C9orf7|D9S2135|FLOWER|-|9q34.2|protein-coding	46.6944	-0.280009	0.4738	-0.590985	0.55453	0.999987	11094	CACFD1
PYGO2|1190004M21Rik|-|1q21.3|protein-coding	527.859	0.214745	0.144818	1.48286	0.138112	0.999987	90780	PYGO2
PDK2|PDHK2|PDKII|-|17q21.33|protein-coding	140.802	-0.235627	0.37176	-0.633815	0.526202	0.999987	5164	PDK2
NPC1L1|NPC11L1|-|7p13|protein-coding	0.49233	2.44272	3.99656	0.611206	0.541063	0.999987	29881	NPC1L1
CACNA1G|Ca(V)T.1|Cav3.1|NBR13|SCA42|-|17q21.33|protein-coding	1.50646	0.381705	1.75841	0.217074	0.828151	0.999987	8913	CACNA1G
LTC4S|-|-|5q35.3|protein-coding	1.67229	-0.537867	1.62145	-0.331719	0.740101	0.999987	4056	LTC4S
PITPNM1|DRES9|NIR2|PITPNM|RDGB|RDGB1|RDGBA|RDGBA1|Rd9|-|11q13.2|protein-coding	515.763	-0.130011	0.208843	-0.622529	0.533594	0.999987	9600	PITPNM1
CD24|CD24A|-|6q21|protein-coding	0.343362	0.0322791	4.08047	0.00791063	0.993688	0.999987	100133941	CD24
SUGT1P1|SGT1P|SUGT1P|bA255A11.1|-|9p13.3|pseudo	11.6538	0.379202	0.647473	0.585665	0.558101	0.999987	441394	SUGT1P1
MIR7851|hsa-mir-7851|-|12q12|ncRNA	0.844871	-1.90866	2.82959	-0.674535	0.499971	0.999987	102467003	MIR7851
PDYN|ADCA|PENKB|SCA23|-|20p13|protein-coding	0.33086	0.0322791	4.08047	0.00791063	0.993688	0.999987	5173	PDYN
ATPIF1|ATPI|ATPIP|IP|-|1p35.3|protein-coding	1021.43	-0.0029851	0.131681	-0.0226692	0.981914	0.999987	93974	ATPIF1
MCOLN2|TRP-ML2|TRPML2|-|1p22.3|protein-coding	20.4748	0.18667	0.932443	0.200195	0.841328	0.999987	255231	MCOLN2
PBX1|-|-|1q23.3|protein-coding	147.322	0.0306199	0.289794	0.105661	0.915851	0.999987	5087	PBX1
PCDHB18P|PCDH-psi2|PCDHB18|-|5q31.3|pseudo	0.824792	-1.87071	2.36729	-0.790232	0.429392	0.999987	54660	PCDHB18P
NDEL1|EOPA|MITAP1|NDE1L1|NDE2|NUDEL|-|17p13.1|protein-coding	1312.59	0.0229672	0.111362	0.20624	0.836604	0.999987	81565	NDEL1
POU2F3|Epoc-1|OCT-11|OCT11|OTF-11|PLA-1|PLA1|Skn-1a|-|11q23.3|protein-coding	0.350242	1.94074	4.03333	0.481175	0.630392	0.999987	25833	POU2F3
NEDD9|CAS-L|CAS2|CASL|CASS2|HEF1|-|6p24.2|protein-coding	1445.36	-0.305911	0.31904	-0.95885	0.337634	0.999987	4739	NEDD9
CMTM3|BNAS2|CKLFSF3|-|16q22.1|protein-coding	1760.63	-0.17799	0.198442	-0.896938	0.369752	0.999987	123920	CMTM3
TRAF3IP2-AS1|C6UAS|C6orf3|NCRNA00248|TRAF3IP2-AS2|-|6q21|ncRNA	30.1937	0.302772	0.388771	0.778794	0.436101	0.999987	643749	TRAF3IP2-AS1
P2RX7|P2X7|-|12q24.31|protein-coding	26.2053	-0.862526	0.600898	-1.4354	0.151174	0.999987	5027	P2RX7
KLRC4|NKG2-F|NKG2F|-|12p13.2|protein-coding	0.489685	-0.841025	3.24622	-0.259078	0.795575	0.999987	8302	KLRC4
LINC00938|-|-|12q12|ncRNA	99.3667	0.108807	0.268064	0.4059	0.684816	0.999987	400027	LINC00938
NOS3|ECNOS|eNOS|-|7q36.1|protein-coding	13.4488	0.86966	0.631758	1.37657	0.168645	0.999987	4846	NOS3
LRRC40|dJ677H15.1|-|1p31.1|protein-coding	742.38	0.144099	0.133743	1.07743	0.281287	0.999987	55631	LRRC40
ZMYND15|SPGF14|-|17p13.2|protein-coding	0.490835	-2.40338	3.99506	-0.601589	0.547448	0.999987	84225	ZMYND15
WTAP|Mum2|-|6q25.3|protein-coding	642.916	0.172241	0.167474	1.02846	0.303731	0.999987	9589	WTAP
GRIA1|GLUH1|GLUR1|GLURA|GluA1|HBGR1|-|5q33.2|protein-coding	32.6345	0.144299	0.67029	0.215278	0.82955	0.999987	2890	GRIA1
LOC102723493|-|-|15q22.32-q22.33|ncRNA	1.649	0.665717	1.70948	0.389426	0.696961	0.999987	102723493	LOC102723493
PGF|D12S1900|PGFL|PIGF|PLGF|PlGF-2|SHGC-10760|-|14q24.3|protein-coding	67.3848	0.252023	0.713792	0.353076	0.724031	0.999987	5228	PGF
ERAP1|A-LAP|ALAP|APPILS|ARTS-1|ARTS1|ERAAP|ERAAP1|PILS-AP|PILSAP|-|5q15|protein-coding	2159.52	-0.484388	0.209895	-2.30776	0.0210125	0.999987	51752	ERAP1
CCDC17|-|-|1p34.1|protein-coding	4.17029	-0.0768162	1.20104	-0.063958	0.949004	0.999987	149483	CCDC17
SNORA55|ACA55|-|1p34.3|snoRNA	1.98318	0.0402095	1.65271	0.0243294	0.98059	0.999987	677834	SNORA55
ABCC1|ABC29|ABCC|GS-X|MRP|MRP1|-|16p13.11|protein-coding	1769.3	0.0844297	0.15919	0.530369	0.595856	0.999987	4363	ABCC1
LOC105376805|-|-|1p36.13|ncRNA	11.4119	-0.0978292	0.748474	-0.130705	0.896009	0.999987	105376805	LOC105376805
ACP5|HPAP|TRACP5a|TRACP5b|TRAP|TrATPase|-|19p13.2|protein-coding	1.84879	-0.238608	1.44863	-0.164713	0.86917	0.999987	54	ACP5
CBX3|HECH|HP1-GAMMA|HP1Hs-gamma|-|7p15.2|protein-coding	2749.6	0.211756	0.163667	1.29383	0.195726	0.999987	11335	CBX3
FAM71F1|FAM137A|NYD-SP18|-|7q32.1|protein-coding	1.32377	0.0508288	1.80395	0.0281765	0.977521	0.999987	84691	FAM71F1
ABRA|STARS|-|8q23.1|protein-coding	0.32971	1.86485	4.04005	0.46159	0.644375	0.999987	137735	ABRA
UAP1L1|-|-|9q34.3|protein-coding	704.38	-0.16755	0.253316	-0.661428	0.508338	0.999987	91373	UAP1L1
MFAP1|-|-|15q15.3|protein-coding	980.542	-0.0461817	0.113294	-0.407627	0.683547	0.999987	4236	MFAP1
POLE|CRCS12|FILS|POLE1|-|12q24.33|protein-coding	1104.6	0.156371	0.20448	0.764725	0.444435	0.999987	5426	POLE
IRF5|SLEB10|-|7q32.1|protein-coding	4.76054	-0.0725036	1.12033	-0.0647162	0.9484	0.999987	3663	IRF5
B3GALT5|B3GalT-V|B3GalTx|B3T5|GLCT5|beta-1,3-GalTase 5|beta-3-Gx-T5|beta3Gal-T5|-|21q22.2|protein-coding	0.333957	0.0322791	4.08047	0.00791063	0.993688	0.999987	10317	B3GALT5
PSG8|PSG1|-|19q13.2|protein-coding	1.00656	0.972149	2.72436	0.356836	0.721215	0.999987	440533	PSG8
TMEM56|-|-|1p21.3|protein-coding	3.18255	0.168993	1.22341	0.138133	0.890135	0.999987	148534	TMEM56
APOL2|APOL-II|APOL3|-|22q12.3|protein-coding	691.59	-0.140377	0.134103	-1.04679	0.295196	0.999987	23780	APOL2
HIPK3|DYRK6|FIST3|PKY|YAK1|-|11p13|protein-coding	1228.94	0.0731274	0.111249	0.657332	0.510968	0.999987	10114	HIPK3
GLB1L3|-|-|11q25|protein-coding	0.336481	-1.85399	4.03532	-0.45944	0.645918	0.999987	112937	GLB1L3
FXN|CyaY|FA|FARR|FRDA|X25|-|9q21.11|protein-coding	262.029	0.0880521	0.17402	0.505988	0.612865	0.999987	2395	FXN
CLEC2D|CLAX|LLT1|OCIL|-|12p13.31|protein-coding	58.8029	-0.0284881	0.370756	-0.0768379	0.938752	0.999987	29121	CLEC2D
AATK|AATYK|AATYK1|LMR1|LMTK1|PPP1R77|p35BP|-|17q25.3|protein-coding	8.22687	-1.78353	0.770689	-2.3142	0.020657	0.999987	9625	AATK
SNX10|OPTB8|-|7p15.2|protein-coding	0.505293	-0.91515	4.03332	-0.226898	0.820503	0.999987	29887	SNX10
PVRIG2P|-|-|7q22.1|pseudo	57.5525	-0.0832159	0.321071	-0.259183	0.795494	0.999987	101752334	PVRIG2P
FSTL5|-|-|4q32.2|protein-coding	1.02309	-1.01448	2.79217	-0.36333	0.716359	0.999987	56884	FSTL5
CRY2|HCRY2|PHLL2|-|11p11.2|protein-coding	222.69	-0.0661444	0.199148	-0.332137	0.739786	0.999987	1408	CRY2
FRMD4B|6030440G05Rik|GRSP1|-|3p14.1|protein-coding	27.7087	-0.129915	0.644966	-0.20143	0.840362	0.999987	23150	FRMD4B
SMIM19|C8orf40|-|8p11.21|protein-coding	241.837	0.330648	0.170945	1.93424	0.0530832	0.999987	114926	SMIM19
LOC400927-CSNK1E|-|-|22q13.1|protein-coding	1679.38	0.0447676	0.0915391	0.489054	0.624804	0.999987	102800317	LOC400927-CSNK1E
NTAN1|PNAA|PNAD|-|16p13.11|protein-coding	1143.25	-0.0807458	0.153742	-0.525204	0.599441	0.999987	123803	NTAN1
IFIT2|G10P2|GARG-39|IFI-54|IFI-54K|IFI54|IFIT-2|ISG-54 K|ISG-54K|ISG54|P54|cig42|-|10q23.31|protein-coding	134.253	-0.117149	0.282321	-0.414951	0.678178	0.999987	3433	IFIT2
LINC01234|LCAL84|onco-lncRNA-32|-|12q24.13|ncRNA	2.10588	-1.13858	1.56951	-0.725441	0.468181	0.999987	100506465	LINC01234
REEP2|C5orf19|SGC32445|SPG72|Yip2d|-|5q31.2|protein-coding	70.0729	0.00300472	0.417603	0.00719515	0.994259	0.999987	51308	REEP2
MIR5187|mir-5187|-|1q23.3|ncRNA	0.337741	1.89482	4.03736	0.469322	0.63884	0.999987	100847090	MIR5187
GLIDR|LINC01172|TCONS_00015562|-|9p12|ncRNA	3.33656	0.0156434	1.12842	0.0138631	0.988939	0.999987	389741	GLIDR
PCDHGC5|PCDH-GAMMA-C5|-|5q31.3|protein-coding	1768.62	-0.146264	0.180561	-0.810057	0.417908	0.999987	56097	PCDHGC5
MIR1204|hsa-mir-1204|-|8q24.21|ncRNA	1.8248	1.47523	2.08925	0.706107	0.480121	0.999987	100302185	MIR1204
MORC3|NXP2|ZCW5|ZCWCC3|-|21q22.12|protein-coding	833.482	0.0647023	0.116452	0.555613	0.578475	0.999987	23515	MORC3
CDO1|CDO-I|-|5q22.3|protein-coding	6.61173	-0.408345	0.838866	-0.486782	0.626413	0.999987	1036	CDO1
PLCB1|EIEE12|PI-PLC|PLC-154|PLC-I|PLC-beta-1|PLC154|PLCB1A|PLCB1B|-|20p12.3|protein-coding	256.615	0.611313	0.305752	1.99938	0.0455674	0.999987	23236	PLCB1
PDIA6|ERP5|P5|TXNDC7|-|2p25.1|protein-coding	13723.2	0.0291869	0.116461	0.250616	0.802111	0.999987	10130	PDIA6
CTU1|ATPBD3|NCS6|-|19q13.41|protein-coding	29.3639	0.363159	0.43621	0.832533	0.405108	0.999987	90353	CTU1
GLS2|GA|GLS|LGA|hLGA|-|12q13.3|protein-coding	2.59326	-2.09382	1.7955	-1.16614	0.243557	0.999987	27165	GLS2
ADGRB2|BAI2|-|1p35.2|protein-coding	15.6092	-0.38447	0.664172	-0.578871	0.562676	0.999987	576	ADGRB2
URB1-AS1|C21orf119|PRED84|-|21q22.11|ncRNA	42.7922	0.369951	0.39174	0.944379	0.344976	0.999987	84996	URB1-AS1
GLUD1|GDH|GDH1|GLUD|-|10q23.2|protein-coding	3180.33	-0.0168998	0.124457	-0.135788	0.891989	0.999987	2746	GLUD1
DBNDD1|-|-|16q24.3|protein-coding	21.4243	-0.955042	0.654545	-1.45909	0.14454	0.999987	79007	DBNDD1
PCDHB15|PCDH-BETA15|-|5q31.3|protein-coding	3.56192	-0.117269	1.24168	-0.0944436	0.924757	0.999987	56121	PCDHB15
CLDN12|-|-|7q21.13|protein-coding	808.379	0.201891	0.150227	1.34391	0.178977	0.999987	9069	CLDN12
RPUSD1|C16orf40|RLUCL|-|16p13.3|protein-coding	397.728	-0.0715254	0.189125	-0.378192	0.705288	0.999987	113000	RPUSD1
CYP2D6|CPD6|CYP2D|CYP2D7AP|CYP2D7BP|CYP2D7P2|CYP2D8P2|CYP2DL1|CYPIID6|P450-DB1|P450C2D|P450DB1|-|22q13.2|protein-coding	0.484064	0.9052	3.25639	0.277976	0.78103	0.999987	1565	CYP2D6
C18orf21|HsT3108|PNAS-124|PNAS-131|XTP13|-|18q12.2|protein-coding	300.946	0.126367	0.14274	0.885293	0.375999	0.999987	83608	C18orf21
CD28|Tp44|-|2q33.2|protein-coding	2.16153	0.225889	1.38971	0.162544	0.870877	0.999987	940	CD28
SERTAD3|RBT1|-|19q13.2|protein-coding	325.014	-0.149824	0.227681	-0.658043	0.51051	0.999987	29946	SERTAD3
FLJ30679|-|-|16q24.1|ncRNA	2.16704	0.6829	1.45189	0.470353	0.638103	0.999987	146512	FLJ30679
KLHL7-AS1|PLATAK|-|7p15.3|ncRNA	8.31689	0.104432	0.985133	0.106008	0.915576	0.999987	100775104	KLHL7-AS1
POTEJ|POTE2beta|-|2q21.1|protein-coding	0.33418	1.88175	4.03853	0.46595	0.641251	0.999987	653781	POTEJ
NOXO1|P41NOX|P41NOXA|P41NOXB|P41NOXC|SH3PXD5|SNX28|-|16p13.3|protein-coding	1.19728	3.71844	2.41297	1.54102	0.123312	0.999987	124056	NOXO1
KLRG1|2F1|CLEC15A|MAFA|MAFA-2F1|MAFA-L|MAFA-LIKE|-|12p13.31|protein-coding	6.99363	0.449475	0.830936	0.540926	0.588559	0.999987	10219	KLRG1
PHB|HEL-215|HEL-S-54e|PHB1|-|17q21.33|protein-coding	2404.33	-0.0254402	0.110821	-0.229562	0.818432	0.999987	5245	PHB
KLF7|UKLF|-|2q33.3|protein-coding	839.939	-0.221074	0.25427	-0.869447	0.384603	0.999987	8609	KLF7
GPCPD1|EDI3|GDE5|GDPD6|PREI4|-|20p12.3|protein-coding	928.276	-0.145026	0.185505	-0.781788	0.434339	0.999987	56261	GPCPD1
MAP3K11|MEKK11|MLK-3|MLK3|PTK1|SPRK|-|11q13.1|protein-coding	1368.76	-0.18276	0.135846	-1.34535	0.178513	0.999987	4296	MAP3K11
KLRC2|CD159c|NKG2-C|NKG2C|-|12p13.2|protein-coding	0.973749	0.0519404	2.27424	0.0228386	0.981779	0.999987	3822	KLRC2
TEPSIN|C17orf56|ENTHD2|-|17q25.3|protein-coding	197.09	-0.0604191	0.202458	-0.298428	0.765377	0.999987	146705	TEPSIN
ZIC4|-|-|3q24|protein-coding	70.0375	0.15811	0.35368	0.447044	0.654844	0.999987	84107	ZIC4
FSCN2|RFSN|RP30|-|17q25.3|protein-coding	0.852663	1.94912	2.76285	0.705475	0.480514	0.999987	25794	FSCN2
EXOC3L2|XTP7|-|19q13.32|protein-coding	1.81161	-0.227513	1.62581	-0.139938	0.888709	0.999987	90332	EXOC3L2
MSANTD2|C11orf61|-|11q24.2|protein-coding	341.915	0.164401	0.13598	1.20901	0.226659	0.999987	79684	MSANTD2
RPS3|S3|-|11q13.4|protein-coding	15415.5	0.0134623	0.115764	0.116291	0.907422	0.999987	6188	RPS3
MED23|ARC130|CRSP130|CRSP133|CRSP3|DRIP130|MRT18|SUR-2|SUR2|-|6q23.2|protein-coding	1080.13	-0.061251	0.12281	-0.498748	0.617957	0.999987	9439	MED23
ZCCHC3|C20orf99|-|20p13|protein-coding	496.482	0.131139	0.159729	0.821008	0.411642	0.999987	85364	ZCCHC3
PRUNE2|BMCC1|BNIPXL|C9orf65|KIAA0367|-|9q21.2|protein-coding	2444.76	0.286646	0.22714	1.26198	0.206957	0.999987	158471	PRUNE2
CEP41|JBTS15|TSGA14|-|7q32.2|protein-coding	344.281	0.199225	0.150027	1.32793	0.184202	0.999987	95681	CEP41
ACOT8|HNAACTE|NAP1|PTE-1|PTE-2|PTE1|PTE2|hACTE-III|hTE|-|20q13.12|protein-coding	205.527	-0.22179	0.191522	-1.15804	0.246847	0.999987	10005	ACOT8
CNNM4|ACDP4|-|2q11.2|protein-coding	178.178	-0.173043	0.241209	-0.717398	0.473128	0.999987	26504	CNNM4
COX6B2|COXVIB2|CT59|-|19q13.42|protein-coding	0.329475	0.0322791	4.08047	0.00791063	0.993688	0.999987	125965	COX6B2
DENND5A|RAB6IP1|-|11p15.4|protein-coding	2870.74	-0.142765	0.153927	-0.927488	0.353673	0.999987	23258	DENND5A
ITFG1|2310047C21Rik|CDA08|LNKN-1|TIP|-|16q12.1|protein-coding	1531.44	-0.0729773	0.150942	-0.483479	0.628756	0.999987	81533	ITFG1
HSPA6|HSP70B'|-|1q23.3|protein-coding	1.4725	0.389977	2.04185	0.190991	0.848532	0.999987	3310	HSPA6
SRL|-|-|16p13.3|protein-coding	2.97851	-0.610828	1.27421	-0.479379	0.631669	0.999987	6345	SRL
FOXRED1|FP634|H17|-|11q24.2|protein-coding	367.042	0.224233	0.182939	1.22573	0.220301	0.999987	55572	FOXRED1
SLC5A6|SMVT|-|2p23.3|protein-coding	811.872	-0.0972959	0.168855	-0.57621	0.564473	0.999987	8884	SLC5A6
CPO|-|-|2q33.3|protein-coding	0.502197	-0.900319	3.23365	-0.278422	0.780689	0.999987	130749	CPO
TRIB1|C8FW|GIG-2|GIG2|SKIP1|TRB-1|TRB1|-|8q24.13|protein-coding	219.625	-0.500701	0.240963	-2.07791	0.0377174	0.999987	10221	TRIB1
HNRNPH3|2H9|HNRPH3|-|10q21.3|protein-coding	3463.81	0.189686	0.113816	1.6666	0.0955935	0.999987	3189	HNRNPH3
EPHA5|CEK7|EHK-1|EHK1|EK7|HEK7|TYRO4|-|4q13.1-q13.2|protein-coding	0.841203	-3.17821	3.95861	-0.80286	0.422056	0.999987	2044	EPHA5
PCGF6|MBLR|RNF134|-|10q24.33|protein-coding	178.433	-0.0328592	0.24092	-0.13639	0.891513	0.999987	84108	PCGF6
TWNK|ATXN8|C10orf2|IOSCA|MTDPS7|PEO|PEO1|PEOA3|PRLTS5|SANDO|SCA8|TWINL|-|10q24.31|protein-coding	368.303	0.0833164	0.173309	0.48074	0.630701	0.999987	56652	TWNK
REL|C-Rel|-|2p16.1|protein-coding	144.952	-0.204246	0.24425	-0.836216	0.403033	0.999987	5966	REL
KRI1|-|-|19p13.2|protein-coding	676.586	0.167275	0.209442	0.798671	0.424481	0.999987	65095	KRI1
DALRD3|-|-|3p21.31|protein-coding	364.539	-0.00963641	0.181017	-0.0532349	0.957545	0.999987	55152	DALRD3
IGFBP4|BP-4|HT29-IGFBP|IBP4|IGFBP-4|-|17q21.2|protein-coding	20289.7	-0.215497	0.251327	-0.857434	0.391205	0.999987	3487	IGFBP4
TRPM2|EREG1|KNP3|LTRPC2|LTrpC-2|NUDT9H|NUDT9L1|TRPC7|-|21q22.3|protein-coding	1.33892	-2.68491	2.60214	-1.03181	0.302162	0.999987	7226	TRPM2
SOX21-AS1|-|-|13q32.1|ncRNA	0.66298	2.87048	3.65811	0.784689	0.432636	0.999987	100507533	SOX21-AS1
TK2|MTDPS2|MTTK|PEOB3|SCA31|-|16q21|protein-coding	684.248	-0.114969	0.135829	-0.846425	0.397316	0.999987	7084	TK2
HOXB8|HOX2|HOX2D|Hox-2.4|-|17q21.32|protein-coding	58.0238	-0.81729	0.980924	-0.833183	0.404741	0.999987	3218	HOXB8
DUSP5P1|DUSP5P|-|1q42.13|pseudo	12.8488	-0.776084	0.61816	-1.25547	0.209307	0.999987	574029	DUSP5P1
TM9SF2|P76|-|13q32.3|protein-coding	4187.42	-0.0917148	0.120729	-0.759676	0.447448	0.999987	9375	TM9SF2
SUCLG2|G-SCS|GBETA|GTPSCS|-|3p14.1|protein-coding	1631.09	0.0803166	0.156109	0.51449	0.60691	0.999987	8801	SUCLG2
INSM2|IA-6|IA6|mlt1|-|14q13.2|protein-coding	0.336481	-1.85399	4.03532	-0.45944	0.645918	0.999987	84684	INSM2
MTX2|-|-|2q31.1|protein-coding	826.208	0.0285785	0.107758	0.26521	0.790847	0.999987	10651	MTX2
ADPGK|2610017G09Rik|ADP-GK|-|15q24.1|protein-coding	1874.65	-0.0573428	0.167025	-0.343319	0.731358	0.999987	83440	ADPGK
LOC100507477|-|-|6q24.1|ncRNA	4.93486	0.021967	0.980224	0.0224102	0.982121	0.999987	100507477	LOC100507477
FGR|SRC2|c-fgr|c-src2|p55-Fgr|p55c-fgr|p58-Fgr|p58c-fgr|-|1p35.3|protein-coding	2.03574	-0.491393	1.6426	-0.299155	0.764822	0.999987	2268	FGR
LOC100507156|-|-|8p21.3|ncRNA	15.6	-0.247712	0.608458	-0.407114	0.683924	0.999987	100507156	LOC100507156
GUCY1A3|GC-SA3|GUC1A3|GUCA3|GUCSA3|GUCY1A1|MYMY6|-|4q32.1|protein-coding	2.11794	-0.219472	1.89323	-0.115925	0.907712	0.999987	2982	GUCY1A3
LOC730098|-|-|9p13.3|protein-coding	9.09963	-0.551147	0.764351	-0.721066	0.470869	0.999987	730098	LOC730098
SERPIND1|D22S673|HC2|HCF2|HCII|HLS2|LS2|THPH10|-|22q11.21|protein-coding	5.71762	-0.00814107	1.07991	-0.00753868	0.993985	0.999987	3053	SERPIND1
RPL13AP6|RPL13A_7_1096|bA348N5.5|-|10q25.2|pseudo	1.45804	-1.76648	1.82981	-0.965392	0.334348	0.999987	644511	RPL13AP6
ORC2|ORC2L|-|2q33.1|protein-coding	743.499	-0.0367149	0.105383	-0.348396	0.727543	0.999987	4999	ORC2
SLC8A3|NCX3|-|14q24.2|protein-coding	0.66057	1.48379	2.97804	0.498244	0.618312	0.999987	6547	SLC8A3
GCFC2|C2orf3|DNABF|GCF|TCF9|-|2p12|protein-coding	360.938	0.357932	0.223325	1.60275	0.108991	0.999987	6936	GCFC2
LOC100507431|-|-|11q24.3|ncRNA	1.00347	0.987317	2.31945	0.425668	0.67035	0.999987	100507431	LOC100507431
LOC102723766|-|-|4q35.1|ncRNA	0.502197	-0.900319	3.23365	-0.278422	0.780689	0.999987	102723766	LOC102723766
CFAP57|VWS2|WDR65|-|1p34.2|protein-coding	19.9929	-0.460549	0.610752	-0.754069	0.450808	0.999987	149465	CFAP57
SNX14|RGS-PX2|SCAR20|-|6q14.3|protein-coding	2005.21	0.0183857	0.106078	0.173323	0.862397	0.999987	57231	SNX14
NSUN2|MISU|MRT5|SAKI|TRM4|-|5p15.31|protein-coding	2887.65	0.0911372	0.13688	0.665816	0.505529	0.999987	54888	NSUN2
DPP9|DP9|DPLP9|DPRP-2|DPRP2|-|19p13.3|protein-coding	1873.57	0.0352027	0.118748	0.296448	0.766888	0.999987	91039	DPP9
COL6A3|BTHLM1|DYT27|UCMD1|-|2q37.3|protein-coding	94908.2	0.0357677	0.0875307	0.408631	0.682811	0.999987	1293	COL6A3
GAREM1|C18orf11|FAM59A|GAREM|Gm944|-|18q12.1|protein-coding	15.4537	-0.142164	0.729395	-0.194907	0.845466	0.999987	64762	GAREM1
BTF3L4|-|-|1p32.3|protein-coding	518.568	0.0473615	0.159503	0.296931	0.766519	0.999987	91408	BTF3L4
LOC100132249|-|-|9q13|ncRNA	0.339577	-1.86549	4.03431	-0.462406	0.64379	0.999987	100132249	LOC100132249
ELFN2|LRRC62|PPP1R29|-|22q13.1|protein-coding	6.02586	0.516706	0.874066	0.591152	0.554418	0.999987	114794	ELFN2
OTUD3|DUBA4|-|1p36.13|protein-coding	404.77	-0.127743	0.154872	-0.82483	0.409468	0.999987	23252	OTUD3
AZIN2|ADC|AZI2|AZIB1|ODC-p|ODC1L|ODCp|-|1p35.1|protein-coding	35.1405	-0.696707	0.470694	-1.48017	0.138828	0.999987	113451	AZIN2
KDM4C|GASC1|JHDM3C|JMJD2C|TDRD14C|-|9p24.1|protein-coding	475.845	0.00143669	0.142492	0.0100826	0.991955	0.999987	23081	KDM4C
AKR1C4|3-alpha-HSD|C11|CDR|CHDR|DD-4|DD4|HAKRA|-|10p15.1|protein-coding	0.505517	0.919978	4.03853	0.2278	0.819801	0.999987	1109	AKR1C4
SLC38A11|AVT2|-|2q24.3|protein-coding	1.7422	-2.11351	2.39103	-0.883931	0.376733	0.999987	151258	SLC38A11
B3GNT5|B3GN-T5|beta3Gn-T5|-|3q27.1|protein-coding	901.755	0.32354	0.168119	1.92447	0.0542954	0.999987	84002	B3GNT5
CDK9|C-2k|CDC2L4|CTK1|PITALRE|TAK|-|9q34.11|protein-coding	1137.28	-0.0767461	0.108479	-0.707472	0.479273	0.999987	1025	CDK9
ABHD11|PP1226|WBSCR21|-|7q11.23|protein-coding	250.16	0.10598	0.185296	0.571947	0.567358	0.999987	83451	ABHD11
PRADC1|C2orf7|PAP21|-|2p13.2|protein-coding	391.034	-0.215814	0.205689	-1.04923	0.294075	0.999987	84279	PRADC1
ADAMTS9|-|-|3p14.1|protein-coding	6191.72	-0.363686	0.313575	-1.1598	0.246128	0.999987	56999	ADAMTS9
AIM1L|CRYBG2|-|1p36.11|protein-coding	0.33418	1.88175	4.03853	0.46595	0.641251	0.999987	55057	AIM1L
TRIM46|GENEY|TRIFIC|-|1q22|protein-coding	24.8296	0.178432	0.478876	0.372605	0.709442	0.999987	80128	TRIM46
TWIST1|ACS3|BPES2|BPES3|CRS|CRS1|CSO|SCS|TWIST|bHLHa38|-|7p21.1|protein-coding	646.481	0.00334243	0.130264	0.0256589	0.979529	0.999987	7291	TWIST1
NKX2-2|NKX2.2|NKX2B|-|20p11.22|protein-coding	1.12363	-0.362025	2.20768	-0.163984	0.869743	0.999987	4821	NKX2-2
BCL2L10|BCL-B|Boo|Diva|bcl2-L-10|-|15q21.2|protein-coding	1.67159	1.25453	1.87649	0.668552	0.503781	0.999987	10017	BCL2L10
PTS|PTPS|-|11q23.1|protein-coding	557.988	0.0911867	0.158738	0.574448	0.565665	0.999987	5805	PTS
ZNF521|EHZF|Evi3|-|18q11.2|protein-coding	560.726	-0.0628825	0.299136	-0.210213	0.833501	0.999987	25925	ZNF521
STX1B|GEFSP9|STX1B1|STX1B2|-|16p11.2|protein-coding	6.57811	-0.688996	0.883861	-0.77953	0.435667	0.999987	112755	STX1B
LOC105374546|-|-|4p15.2|ncRNA	1.14865	-0.375474	1.90086	-0.197529	0.843414	0.999987	105374546	LOC105374546
EGF|HOMG4|URG|-|4q25|protein-coding	1.16391	-0.38416	1.9458	-0.19743	0.843491	0.999987	1950	EGF
FBXW10|Fbw10|HREP|SM25H2|SM2SH2|-|17p11.2|protein-coding	1.35153	0.0627014	2.14884	0.0291791	0.976722	0.999987	10517	FBXW10
JPH1|CMT2K|JP-1|JP1|-|8q21.11|protein-coding	0.497951	0.905296	3.23117	0.280176	0.779343	0.999987	56704	JPH1
PNPLA6|BNHS|LNMS|NTE|NTEMND|OMCS|SPG39|iPLA2delta|sws|-|19p13.2|protein-coding	1147.67	-0.121905	0.162693	-0.749294	0.45368	0.999987	10908	PNPLA6
GRINA|HNRGW|LFG1|NMDARA1|TMBIM3|-|8q24.3|protein-coding	1806.75	-0.181179	0.139477	-1.29899	0.193947	0.999987	2907	GRINA
KCNC4|C1orf30|HKSHIIIC|KSHIIIC|KV3.4|-|1p13.3|protein-coding	17.9604	-0.0877518	0.560333	-0.156606	0.875555	0.999987	3749	KCNC4
MGC27345|-|-|7q32.1|ncRNA	110.101	0.109876	0.268163	0.409738	0.681998	0.999987	157247	MGC27345
RAB35|H-ray|RAB1C|RAY|-|12q24.23|protein-coding	1894	-0.0594589	0.0889721	-0.668287	0.50395	0.999987	11021	RAB35
SOGA3|C6orf174|dJ403A15.3|-|6q22.33|protein-coding	290.119	0.216063	0.311826	0.692895	0.488375	0.999987	387104	SOGA3
STMN4|RB3|-|8p21.2|protein-coding	0.673758	-0.0106719	3.02309	-0.00353012	0.997183	0.999987	81551	STMN4
HEATR3|SYO1|-|16q12.1|protein-coding	811.239	0.0947947	0.108708	0.872015	0.3832	0.999987	55027	HEATR3
CELSR2|ADGRC2|CDHF10|EGFL2|Flamingo1|MEGF3|-|1p13.3|protein-coding	11.5818	0.720279	0.67938	1.0602	0.289053	0.999987	1952	CELSR2
ERP27|C12orf46|PDIA8|-|12p12.3|protein-coding	6.21028	-0.219187	1.07613	-0.203682	0.838602	0.999987	121506	ERP27
ADCYAP1R1|PAC1|PAC1R|PACAPR|PACAPRI|-|7p14.3|protein-coding	4.9167	-0.51811	0.993251	-0.521631	0.601927	0.999987	117	ADCYAP1R1
ERFE|C1QTNF15|CTRP15|FAM132B|-|2q37.3|protein-coding	45.4812	-0.43959	0.445874	-0.985907	0.324179	0.999987	151176	ERFE
LLPH|C12orf31|hLLP|-|12q14.3|protein-coding	488.107	0.0596677	0.151127	0.394818	0.692977	0.999987	84298	LLPH
RNF10|RIE2|-|12q24.31|protein-coding	3345.67	-0.00519136	0.101389	-0.0512027	0.959164	0.999987	9921	RNF10
RAB3IL1|GRAB|-|11q12.2-q12.3|protein-coding	190.956	-0.088988	0.278334	-0.319717	0.749183	0.999987	5866	RAB3IL1
LOC100133331|-|-|1p36.33|ncRNA	8.08935	0.521518	0.884492	0.589625	0.555442	0.999987	100133331	LOC100133331
RYR2|ARVC2|ARVD2|RYR-2|RyR|VTSIP|-|1q43|protein-coding	3.8509	0.171888	1.12599	0.152655	0.87867	0.999987	6262	RYR2
CMAS|CSS|-|12p12.1|protein-coding	955.81	0.0985514	0.11783	0.836388	0.402937	0.999987	55907	CMAS
SNRPD1|HsT2456|SMD1|SNRPD|Sm-D1|-|18q11.2|protein-coding	1405.81	0.176417	0.177522	0.993776	0.320332	0.999987	6632	SNRPD1
HGD|AKU|HGO|-|3q13.33|protein-coding	5.88331	0.283494	1.17337	0.241606	0.809085	0.999987	3081	HGD
CNGA4|CNCA2|CNG-4|CNG4|CNG5|CNGB2|OCNC2|OCNCBETA|OCNCb|-|11p15.4|protein-coding	0.350242	1.94074	4.03333	0.481175	0.630392	0.999987	1262	CNGA4
SPAG5|DEEPEST|MAP126|hMAP126|-|17q11.2|protein-coding	1688.09	0.167067	0.25121	0.665048	0.506019	0.999987	10615	SPAG5
CTGF|CCN2|HCS24|IGFBP8|NOV2|-|6q23.2|protein-coding	24897.6	-0.789174	0.579828	-1.36105	0.173499	0.999987	1490	CTGF
MSANTD3-TMEFF1|C9orf3-TMEFF1|C9orf30-TMEFF1|-|9q31.1|protein-coding	430.406	0.0308677	0.167585	0.184191	0.853863	0.999987	100526694	MSANTD3-TMEFF1
FLJ22447|-|-|14q23.1-q23.2|ncRNA	1.36782	-0.718342	2.09299	-0.343213	0.731438	0.999987	400221	FLJ22447
FAM208A|C3orf63|RAP140|TASOR|se89-1|-|3p14.3|protein-coding	1421.36	-0.0392888	0.0977087	-0.402102	0.687609	0.999987	23272	FAM208A
CELSR3|ADGRC3|CDHF11|EGFL1|FMI1|HFMI1|MEGF2|RESDA1|-|3p21.31|protein-coding	40.2204	0.0410955	0.431301	0.0952828	0.92409	0.999987	1951	CELSR3
FEM1B|F1A-ALPHA|F1AA|FEM1-beta|-|15q23|protein-coding	1155.41	0.00882244	0.101784	0.0866779	0.930928	0.999987	10116	FEM1B
MIR3605|mir-3605|-|1p35.1|ncRNA	4.80184	0.953088	1.00326	0.949989	0.342118	0.999987	100500853	MIR3605
ZNF853|-|-|7p22.1|protein-coding	6.62596	-0.860236	0.930556	-0.924433	0.355261	0.999987	54753	ZNF853
GOLGA1|golgin-97|-|9q33.3|protein-coding	668.552	0.102588	0.140421	0.730575	0.465039	0.999987	2800	GOLGA1
ADGRV1|FEB4|GPR98|MASS1|USH2B|USH2C|VLGR1|VLGR1b|-|5q14.3|protein-coding	1.96873	-0.460846	1.53308	-0.300602	0.763718	0.999987	84059	ADGRV1
CNTN2|AXT|FAME5|TAG-1|TAX|TAX1|-|1q32.1|protein-coding	0.685573	1.54298	2.96086	0.521127	0.602278	0.999987	6900	CNTN2
PON2|-|-|7q21.3|protein-coding	1581.55	-0.00921637	0.117939	-0.0781449	0.937713	0.999987	5445	PON2
TUBB4A|DYT4|TUBB4|beta-5|-|19p13.3|protein-coding	0.343362	0.0322791	4.08047	0.00791063	0.993688	0.999987	10382	TUBB4A
KIAA1324|EIG121|-|1p13.3|protein-coding	26.9808	-0.780778	0.597078	-1.30767	0.190987	0.999987	57535	KIAA1324
PTBP2|PTBLP|brPTB|nPTB|-|1p21.3|protein-coding	192.428	0.339746	0.236515	1.43646	0.15087	0.999987	58155	PTBP2
LINC01759|-|-|1p36.22|ncRNA	30.165	-0.348737	0.412707	-0.844998	0.398112	0.999987	102724571	LINC01759
TTC3P1|RNF105L|TTC3L|-|Xq13.3|pseudo	28.3595	0.129946	0.551052	0.235815	0.813576	0.999987	286495	TTC3P1
ZNF484|BA526D8.4|-|9q22.31|protein-coding	116.047	0.206487	0.230906	0.894246	0.37119	0.999987	83744	ZNF484
MMP3|CHDS6|MMP-3|SL-1|STMY|STMY1|STR1|-|11q22.2|protein-coding	428.178	1.49745	1.53289	0.976882	0.328628	0.999987	4314	MMP3
ATG9A|APG9L1|MGD3208|mATG9|-|2q35|protein-coding	1868.95	-0.20962	0.111843	-1.87423	0.0608987	0.999987	79065	ATG9A
ARF4|ARF2|-|3p14.3|protein-coding	8260.75	-0.0690212	0.152566	-0.452404	0.650978	0.999987	378	ARF4
CLNS1A|CLCI|CLNS1B|ICln|-|11q14.1|protein-coding	1561.07	0.219828	0.160778	1.36728	0.171539	0.999987	1207	CLNS1A
KLF3|BKLF|-|4p14|protein-coding	1263.59	-0.111364	0.134671	-0.826932	0.408276	0.999987	51274	KLF3
EIF3F|EIF3S5|eIF3-p47|-|11p15.4|protein-coding	2021.09	0.0183232	0.139518	0.131332	0.895512	0.999987	8665	EIF3F
THAP8|-|-|19q13.12|protein-coding	65.0689	-0.00560719	0.31534	-0.0177814	0.985813	0.999987	199745	THAP8
C3orf62|-|-|3p21.31|protein-coding	78.5058	-0.173288	0.280897	-0.61691	0.537294	0.999987	375341	C3orf62
KCND3|BRGDA9|KCND3L|KCND3S|KSHIVB|KV4.3|SCA19|SCA22|-|1p13.2|protein-coding	0.497716	-0.841076	3.23175	-0.260254	0.794668	0.999987	3752	KCND3
ART3|ARTC3|-|4q21.1|4p15.1-p14|protein-coding	1.15071	-1.28687	2.15065	-0.598363	0.549598	0.999987	419	ART3
ARHGAP24|FILGAP|RC-GAP72|RCGAP72|p73|p73RhoGAP|-|4q21.23-q21.3|protein-coding	2649.34	0.0370625	0.182777	0.202775	0.839311	0.999987	83478	ARHGAP24
ZNF10|KOX1|-|12q24.33|protein-coding	107.149	-0.116383	0.294	-0.39586	0.692208	0.999987	7556	ZNF10
CXCL6|CKA-3|GCP-2|GCP2|SCYB6|-|4q13.3|protein-coding	83.1527	0.284648	0.487577	0.583801	0.559354	0.999987	6372	CXCL6
FTL|LFTD|NBIA3|-|19q13.33|protein-coding	51607.6	-0.10513	0.316122	-0.332561	0.739466	0.999987	2512	FTL
C21orf62-AS1|C21orf49|-|21q22.11|ncRNA	3.25854	-0.254971	1.22597	-0.207974	0.835249	0.999987	54067	C21orf62-AS1
HAND2|DHAND2|Hed|Thing2|bHLHa26|dHand|-|4q34.1|protein-coding	207.683	0.184953	0.341605	0.541423	0.588216	0.999987	9464	HAND2
MECR|CGI-63|FASN2B|NRBF1|-|1p35.3|protein-coding	399.456	-0.0862026	0.169969	-0.507165	0.612039	0.999987	51102	MECR
SLC25A33|BMSC-MCP|PNC1|-|1p36.22|protein-coding	125.12	-0.0130876	0.244173	-0.0535998	0.957254	0.999987	84275	SLC25A33
MEGF11|-|-|15q22.31|protein-coding	0.489685	-0.841025	3.24622	-0.259078	0.795575	0.999987	84465	MEGF11
YPEL5|CGI-127|-|2p23.1|protein-coding	1499.85	-0.208596	0.143893	-1.44966	0.147153	0.999987	51646	YPEL5
PRPF40B|HYPC|-|12q13.12|protein-coding	119.501	0.221691	0.240688	0.921069	0.357014	0.999987	25766	PRPF40B
SRRT|ARS2|ASR2|serrate|-|7q22.1|protein-coding	1848.32	0.102154	0.113744	0.898105	0.36913	0.999987	51593	SRRT
RPL30|L30|-|8q22.2|protein-coding	9512.01	0.0366042	0.0858928	0.426162	0.66999	0.999987	6156	RPL30
GMFG|GMF-GAMMA|-|19q13.2|protein-coding	242.36	-0.889266	0.329568	-2.69828	0.00696989	0.999987	9535	GMFG
AGO4|EIF2C4|-|1p34.3|protein-coding	529.461	-0.13614	0.14048	-0.96911	0.33249	0.999987	192670	AGO4
LOC102724919|-|-|1q31.1|ncRNA	0.671687	1.54306	2.97706	0.518316	0.604238	0.999987	102724919	LOC102724919
SNCAIP|SYPH1|Sph1|-|5q23.2|protein-coding	6.36495	0.325958	0.946195	0.344493	0.730476	0.999987	9627	SNCAIP
RAB37|-|-|17q25.1|protein-coding	7.99892	0.0367572	0.801334	0.04587	0.963414	0.999987	326624	RAB37
ACOT7|ACH1|ACT|BACH|CTE-II|LACH|LACH1|hBACH|-|1p36.31|protein-coding	1246.84	-0.0496156	0.105384	-0.470806	0.637779	0.999987	11332	ACOT7
MRPL4|CGI-28|L4mt|-|19p13.2|protein-coding	776.22	0.150378	0.203952	0.737317	0.46093	0.999987	51073	MRPL4
PTPN11|BPTP3|CFC|JMML|METCDS|NS1|PTP-1D|PTP2C|SH-PTP2|SH-PTP3|SHP2|-|12q24.13|protein-coding	5252.4	-0.0273852	0.0812386	-0.337096	0.736045	0.999987	5781	PTPN11
LOC101927124|-|-|14q12|ncRNA	0.821571	0.704705	2.84148	0.248006	0.804129	0.999987	101927124	LOC101927124
SGK1|SGK|-|6q23.2|protein-coding	3991.18	-0.189566	0.162537	-1.1663	0.243495	0.999987	6446	SGK1
MTTP|ABL|MTP|-|4q23|protein-coding	1.84007	0.287217	1.44672	0.19853	0.842631	0.999987	4547	MTTP
PARP4|ADPRTL1|ARTD4|PARP-4|PARPL|PH5P|VAULT3|VPARP|VWA5C|p193|-|13q12.12|protein-coding	2417.78	0.157168	0.108579	1.44751	0.147755	0.999987	143	PARP4
IFIT5|ISG58|P58|RI58|-|10q23.31|protein-coding	756.433	0.0164272	0.15598	0.105316	0.916125	0.999987	24138	IFIT5
RAMP2|-|-|17q21.2|protein-coding	43.6419	-0.18051	0.47788	-0.377731	0.705631	0.999987	10266	RAMP2
CYTH4|CYT4|DJ63G5.1|PSCD4|cytohesin-4|-|22q13.1|protein-coding	2.15384	1.20876	1.44083	0.838937	0.401504	0.999987	27128	CYTH4
PDIA5|PDIR|-|3q21.1|protein-coding	1570.69	-0.0219153	0.126054	-0.173856	0.861978	0.999987	10954	PDIA5
ARHGEF33|-|-|2p22.1|protein-coding	4.82821	0.979944	0.998964	0.98096	0.326612	0.999987	100271715	ARHGEF33
PPHLN1|CR|HSPC206|HSPC232|-|12q12|protein-coding	1028.76	0.0924912	0.161415	0.573002	0.566643	0.999987	51535	PPHLN1
TUBA4B|TUBA4|-|2q35|pseudo	0.32971	1.86485	4.04005	0.46159	0.644375	0.999987	80086	TUBA4B
INHA|-|-|2q35|protein-coding	1.32445	-0.700842	1.64944	-0.424898	0.670911	0.999987	3623	INHA
CCL3L3|464.2|D17S1718|G0S19-2|LD78|LD78BETA|SCYA3L|SCYA3L1|-|17q12|protein-coding	0.630153	-1.36648	3.81909	-0.357802	0.720492	0.999987	414062	CCL3L3
LOC102546294|-|-|5q32|ncRNA	1.85097	-0.205259	1.65203	-0.124246	0.90112	0.999987	102546294	LOC102546294
TAF4B|SPGF13|TAF2C2|TAFII105|-|18q11.2|protein-coding	121.603	0.0684223	0.368852	0.185501	0.852836	0.999987	6875	TAF4B
PIK3C3|VPS34|Vps34|hVps34|-|18q12.3|protein-coding	1136.56	-0.186834	0.110086	-1.69715	0.0896678	0.999987	5289	PIK3C3
NEDD8|NEDD-8|-|14q12|protein-coding	2507.54	-0.0250132	0.104384	-0.239627	0.810619	0.999987	4738	NEDD8
TCAF2P1|FAM115D|FAM139B|-|7q35|pseudo	2.3473	0.452017	1.35163	0.334425	0.738059	0.999987	653691	TCAF2P1
FARP1|CDEP|FARP1-IT1|PLEKHC2|PPP1R75|-|13q32.2|protein-coding	1860.72	-0.100216	0.13191	-0.759727	0.447418	0.999987	10160	FARP1
FAM86DP|FAM86D|-|3p12.3|pseudo	128.94	0.292186	0.33157	0.88122	0.378199	0.999987	692099	FAM86DP
TMEM127|-|-|2q11.2|protein-coding	1750.8	-0.171486	0.169799	-1.00994	0.312526	0.999987	55654	TMEM127
NMU|-|-|4q12|protein-coding	0.665041	1.4946	2.97489	0.502404	0.615383	0.999987	10874	NMU
GAS7|MLL/GAS7|-|17p13.1|protein-coding	18.9551	-2.05074	0.965207	-2.12467	0.0336144	0.999987	8522	GAS7
SAA2-SAA4|-|-|11p15.1|protein-coding	0.336481	-1.85399	4.03532	-0.45944	0.645918	0.999987	100528017	SAA2-SAA4
CCDC61|-|-|19q13.32|protein-coding	108.862	0.242528	0.2796	0.867408	0.385718	0.999987	729440	CCDC61
NDUFB1|CI-MNLL|CI-SGDH|MNLL|-|14q32.12|protein-coding	514.752	0.100447	0.131058	0.766431	0.44342	0.999987	4707	NDUFB1
LOC100506124|-|-|2q24.3|ncRNA	18.8074	0.0640875	0.494235	0.12967	0.896828	0.999987	100506124	LOC100506124
TMED10|P24(DELTA)|S31I125|S31III125|TMP21|Tmp-21-I|p23|p24d1|-|14q24.3|protein-coding	6467.02	-0.00137155	0.133332	-0.0102867	0.991793	0.999987	10972	TMED10
CHN2|ARHGAP3|BCH|CHN2-3|RHOGAP3|-|7p14.3|protein-coding	1.98342	1.59972	1.51885	1.05324	0.292229	0.999987	1124	CHN2
KCTD1|C18orf5|SENS|-|18q11.2|protein-coding	141.934	0.196106	0.197653	0.992174	0.321112	0.999987	284252	KCTD1
CDH5|7B4|CD144|-|16q21|protein-coding	2586.13	-0.40828	0.330763	-1.23436	0.217069	0.999987	1003	CDH5
CFAP97|KIAA1430|hmw|-|4q35.1|protein-coding	1222.07	0.277557	0.172885	1.60544	0.108397	0.999987	57587	CFAP97
TEX21P|-|-|14q23.3|pseudo	1.49534	0.332248	1.60105	0.207519	0.835604	0.999987	441687	TEX21P
MINPP1|HIPER1|MINPP2|MIPP|-|10q23.2|protein-coding	543.357	0.224884	0.197728	1.13734	0.255396	0.999987	9562	MINPP1
MT1E|MT-1E|MT-IE|MT1|MTD|-|16q13|protein-coding	1958.76	0.140276	0.284542	0.492989	0.62202	0.999987	4493	MT1E
NBR2|NCRNA00192|-|17q21.31|ncRNA	34.1695	0.277406	0.456017	0.608324	0.542972	0.999987	10230	NBR2
FOXP2|CAGH44|SPCH1|TNRC10|-|7q31.1|protein-coding	13.1073	1.12038	0.834743	1.34218	0.179536	0.999987	93986	FOXP2
RGL3|-|-|19p13.2|protein-coding	8.43465	-1.34086	0.959115	-1.39802	0.162108	0.999987	57139	RGL3
SNAPC4|PTFalpha|SNAP190|-|9q34.3|protein-coding	302.425	0.0502057	0.179264	0.280065	0.779427	0.999987	6621	SNAPC4
C1QTNF7|CTRP7|ZACRP7|-|4p15.32|protein-coding	4.1112	-1.32556	1.05989	-1.25065	0.211061	0.999987	114905	C1QTNF7
SATB2-AS1|-|-|2q33.1|ncRNA	0.329475	0.0322791	4.08047	0.00791063	0.993688	0.999987	150538	SATB2-AS1
SETX|ALS4|AOA2|SCAR1|bA479K20.2|-|9q34.13|protein-coding	2968.93	-0.0294367	0.0863018	-0.34109	0.733036	0.999987	23064	SETX
NLE1|Nle|-|17q12|protein-coding	385.05	0.0441195	0.163511	0.269826	0.787294	0.999987	54475	NLE1
TTC4|-|-|1p32.3|protein-coding	1084.54	0.0120769	0.107479	0.112365	0.910534	0.999987	7268	TTC4
CEP19|C3orf34|MOSPGF|-|3q29|protein-coding	61.2854	0.00541335	0.305023	0.0177474	0.98584	0.999987	84984	CEP19
IMPA2|-|-|18p11.21|protein-coding	41.7708	0.197082	0.350198	0.562774	0.573589	0.999987	3613	IMPA2
LOXHD1|DFNB77|LH2D1|-|18q21.1|protein-coding	0.329475	0.0322791	4.08047	0.00791063	0.993688	0.999987	125336	LOXHD1
IRF2BP1|-|-|19q13.32|protein-coding	146.446	0.142366	0.219889	0.647446	0.517344	0.999987	26145	IRF2BP1
MRPL55|AAVG5835|L55nt|MRP-L55|PRO19675|-|1q42.13|protein-coding	292.885	0.0471438	0.161312	0.292251	0.770094	0.999987	128308	MRPL55
ZCCHC14|BDG-29|BDG29|-|16q24.2|protein-coding	555.393	0.0665073	0.196198	0.33898	0.734625	0.999987	23174	ZCCHC14
LOC100129203|-|-|11q21|ncRNA	2.51795	0.622787	1.2739	0.488881	0.624926	0.999987	100129203	LOC100129203
MMADHC|C2orf25|CL25022|cblD|-|2q23.2|protein-coding	2395.95	0.018222	0.093686	0.194501	0.845783	0.999987	27249	MMADHC
LOC102724596|-|-|17q21.33|ncRNA	1.34018	-2.69302	2.08436	-1.29201	0.196353	0.999987	102724596	LOC102724596
DNLZ|C9orf151|HEP|HEP1|TIMM15|ZIM17|bA413M3.2|-|9q34.3|protein-coding	161.723	0.335774	0.238732	1.40649	0.159578	0.999987	728489	DNLZ
ZNF813|-|-|19q13.42|protein-coding	64.5521	-0.0849202	0.296018	-0.286875	0.774208	0.999987	126017	ZNF813
PSMA6|IOTA|PROS27|p27K|-|14q13.2|protein-coding	2257.46	0.0290214	0.0892436	0.325193	0.745035	0.999987	5687	PSMA6
C14orf79|-|-|14q32.33|protein-coding	119.227	0.257383	0.221582	1.16157	0.245412	0.999987	122616	C14orf79
RTN4RL2|NGRH1|NgR2|-|11q12.1|protein-coding	11.006	-0.796933	0.653998	-1.21856	0.223013	0.999987	349667	RTN4RL2
HIST1H2BD|H2B.1B|H2B/b|H2BFB|HIRIP2|dJ221C16.6|-|6p22.2|protein-coding	22.7018	-0.572525	0.476994	-1.20028	0.230032	0.999987	3017	HIST1H2BD
PPP4R1L|C20orf192|PPP4R1P1|PRO1085|-|20q13.32|pseudo	112.081	0.252998	0.320077	0.790428	0.429278	0.999987	55370	PPP4R1L
TGFB2-AS1|-|-|1q41|ncRNA	0.476949	-2.36579	3.99736	-0.591838	0.553959	0.999987	728463	TGFB2-AS1
OR1J4|HSHTPCRX01|HTPCRX01|OR9-21|-|9q33.2|protein-coding	0.851513	3.22837	3.34162	0.966111	0.333988	0.999987	26219	OR1J4
LINC00634|BK250D10.8|-|22q13.2|ncRNA	1.48731	0.320161	1.75731	0.182189	0.855435	0.999987	339674	LINC00634
CHST6|MCDC1|-|16q23.1|protein-coding	16.235	0.755466	0.862011	0.8764	0.380813	0.999987	4166	CHST6
HLA-F-AS1|-|-|6p22.1|ncRNA	21.5105	-0.778916	0.547512	-1.42265	0.154838	0.999987	285830	HLA-F-AS1
SLC39A13|LZT-Hs9|-|11p11.2|protein-coding	2041.55	-0.0394866	0.130135	-0.303427	0.761564	0.999987	91252	SLC39A13
GUCY1A2|GC-SA2|GUC1A2|-|11q22.3|protein-coding	2.81864	0.91954	1.22971	0.747772	0.454598	0.999987	2977	GUCY1A2
ATAD2B|-|-|2p24.1-p23.3|protein-coding	233.508	0.203612	0.181045	1.12465	0.260737	0.999987	54454	ATAD2B
PRPF18|PRP18|hPrp18|-|10p13|protein-coding	503.966	0.0454814	0.165669	0.274531	0.783676	0.999987	8559	PRPF18
ATG9B|APG9L2|NOS3AS|SONE|-|7q36.1|protein-coding	4.39754	-0.486847	1.07565	-0.452607	0.650832	0.999987	285973	ATG9B
IL17RE|-|-|3p25.3|protein-coding	355.779	-0.10666	0.222229	-0.479956	0.631258	0.999987	132014	IL17RE
HIST1H4H|H4/h|H4FH|-|6p22.2|protein-coding	8.02267	0.525092	0.768108	0.683617	0.494217	0.999987	8365	HIST1H4H
FHOD3|FHOS2|Formactin2|-|18q12.2|protein-coding	253.694	0.349145	0.243238	1.4354	0.151173	0.999987	80206	FHOD3
ISLR2|LINX|-|15q24.1|protein-coding	0.652305	0.0321578	2.56249	0.0125494	0.989987	0.999987	57611	ISLR2
SDHAF2|C11orf79|PGL2|SDH5|-|11q12.2|protein-coding	920.076	-0.0918608	0.107659	-0.853258	0.393516	0.999987	54949	SDHAF2
RMDN1|CGI-90|FAM82B|RMD-1|RMD1|-|8q21.3|protein-coding	891.323	0.195702	0.108085	1.81063	0.0701989	0.999987	51115	RMDN1
CNR1|CANN6|CB-R|CB1|CB1A|CB1K5|CB1R|CNR|-|6q15|protein-coding	11.0701	0.758941	1.21763	0.623295	0.533091	0.999987	1268	CNR1
SMOC1|OAS|-|14q24.2|protein-coding	11.0512	0.315595	1.22373	0.257895	0.796488	0.999987	64093	SMOC1
E2F1|E2F-1|RBAP1|RBBP3|RBP3|-|20q11.22|protein-coding	420.404	0.309058	0.272102	1.13582	0.256033	0.999987	1869	E2F1
CNTN6|NB3|-|3p26.3|protein-coding	5.42593	0.431786	1.65067	0.261583	0.793643	0.999987	27255	CNTN6
NRAS|ALPS4|CMNS|N-ras|NCMS|NRAS1|NS6|-|1p13.2|protein-coding	3158.21	0.068487	0.122	0.561368	0.574546	0.999987	4893	NRAS
FAM135A|KIAA1411|-|6q13|protein-coding	183.693	0.144468	0.198104	0.729253	0.465847	0.999987	57579	FAM135A
DIP2A-IT1|-|-|21q22.3|ncRNA	1.34522	0.0320034	1.6448	0.0194574	0.984476	0.999987	100862692	DIP2A-IT1
PPP1R42|LRRC67|TLLR|dtr|-|8q13.1|protein-coding	0.33418	1.88175	4.03853	0.46595	0.641251	0.999987	286187	PPP1R42
CAMK2N2|CAM-KIIN|CAMKIIN|-|3q27.1|protein-coding	2.14787	-1.15396	1.54	-0.749324	0.453662	0.999987	94032	CAMK2N2
PRKD3|EPK2|PKC-NU|PKD3|PRKCN|nPKC-NU|-|2p22.2|protein-coding	2153.12	0.162576	0.115297	1.41005	0.158524	0.999987	23683	PRKD3
TBX19|TBS19|TPIT|dJ747L4.1|-|1q24.2|protein-coding	14.1082	-0.214063	0.56627	-0.378022	0.705414	0.999987	9095	TBX19
IL4|BCGF-1|BCGF1|BSF-1|BSF1|IL-4|-|5q31.1|protein-coding	0.665268	-2.83905	2.86464	-0.991068	0.321652	0.999987	3565	IL4
HEPH|CPL|-|Xq12|protein-coding	141.382	0.358478	0.329252	1.08877	0.276257	0.999987	9843	HEPH
PNPLA2|1110001C14Rik|ATGL|FP17548|PEDF-R|TTS-2.2|TTS2|iPLA2zeta|-|11p15.5|protein-coding	844.766	-0.0277289	0.239635	-0.115713	0.90788	0.999987	57104	PNPLA2
COL4A5|ASLN|ATS|CA54|-|Xq22.3|protein-coding	1647.48	0.00904904	0.376998	0.0240029	0.98085	0.999987	1287	COL4A5
FGD5|ZFYVE23|-|3p25.1|protein-coding	993.107	-0.43505	0.304883	-1.42694	0.153596	0.999987	152273	FGD5
FBXO7|FBX|FBX07|FBX7|PARK15|PKPS|-|22q12.3|protein-coding	2020.26	-0.0676922	0.0882111	-0.767388	0.442851	0.999987	25793	FBXO7
LOC100287896|-|-|11q13.4|protein-coding	14.1829	0.550341	0.580223	0.948499	0.342875	0.999987	100287896	LOC100287896
SLC25A2|ORC2|ORNT2|-|5q31.3|protein-coding	0.497716	-0.841076	3.23175	-0.260254	0.794668	0.999987	83884	SLC25A2
PABPC4L|-|-|4q28.3|protein-coding	20.9436	-1.24436	0.893693	-1.39238	0.163806	0.999987	132430	PABPC4L
IKZF3|AIO|AIOLOS|ZNFN1A3|-|17q12-q21.1|protein-coding	1.84856	1.42428	1.8769	0.758847	0.447944	0.999987	22806	IKZF3
CKB|B-CK|BCK|CKBB|HEL-211|HEL-S-29|-|14q32.33|protein-coding	120.446	-0.103939	0.369136	-0.281574	0.778271	0.999987	1152	CKB
PRRT2|BFIC2|BFIS2|DSPB3|DYT10|EKD1|FICCA|ICCA|IFITMD1|PKC|-|16p11.2|protein-coding	10.5344	0.248187	0.665681	0.372832	0.709273	0.999987	112476	PRRT2
PCYOX1|PCL1|-|2p13.3|protein-coding	2513.25	-0.195118	0.174713	-1.11679	0.264083	0.999987	51449	PCYOX1
SNORA71C|U71c|-|20q11.23|snoRNA	3.03244	-0.663925	1.44983	-0.457933	0.647	0.999987	677839	SNORA71C
C19orf33|H2RSP|IMUP|IMUP-1|IMUP-2|-|19q13.2|protein-coding	1.80828	-0.745475	1.49873	-0.497405	0.618903	0.999987	64073	C19orf33
MARCH7|AXO|AXOT|MARCH-VII|RNF177|-|2q24.2|protein-coding	2078.82	0.0355544	0.0931126	0.381844	0.702577	0.999987	64844	2019-03-07
PTPRZ1|HPTPZ|HPTPzeta|PTP-ZETA|PTP18|PTPRZ|PTPZ|R-PTP-zeta-2|RPTPB|RPTPbeta|phosphacan|-|7q31.32|protein-coding	1.65647	1.20113	2.38209	0.504235	0.614096	0.999987	5803	PTPRZ1
RBM34|-|-|1q42.3|protein-coding	846.313	0.158912	0.171734	0.925338	0.35479	0.999987	23029	RBM34
REM2|-|-|14q11.2|protein-coding	1.16517	1.37102	1.91301	0.716685	0.473569	0.999987	161253	REM2
MTFR2|DUFD1|FAM54A|-|6q23.3|protein-coding	200.514	0.285638	0.275119	1.03823	0.299161	0.999987	113115	MTFR2
PARP6|ARTD17|PARP-6-B1|PARP-6-C|pART17|-|15q23|protein-coding	432.265	0.0314196	0.139846	0.224672	0.822234	0.999987	56965	PARP6
MELTF-AS1|MFI2-AS1|-|3q29|ncRNA	10.014	0.017871	0.675727	0.026447	0.978901	0.999987	100507057	MELTF-AS1
FAM166B|-|-|9p13.3|protein-coding	1.49626	1.80277	2.03466	0.886032	0.375601	0.999987	730112	FAM166B
DIRC3-AS1|-|-|2q35|ncRNA	0.480045	-2.37416	3.99684	-0.594009	0.552506	0.999987	105373877	DIRC3-AS1
LOC101409256|-|-|7q21.13|pseudo	2.14741	-0.185887	1.33229	-0.139524	0.889036	0.999987	101409256	LOC101409256
NT5C1B|AIRP|CN-IB|CN1B|-|2p24.2|protein-coding	0.49348	0.886025	4.04161	0.219226	0.826474	0.999987	93034	NT5C1B
BTG4|APRO3|PC3B|-|11q23.1|protein-coding	1.65622	-0.560569	1.96006	-0.285995	0.774882	0.999987	54766	BTG4
PLD5|PLDC|-|1q43|protein-coding	1.69832	3.12364	2.3611	1.32296	0.18585	0.999987	200150	PLD5
SEPT8|SEP2|-|5q31.1|protein-coding	3490.44	-0.180756	0.107421	-1.6827	0.0924333	0.999987	23176	2019-09-08
TTC3|DCRR1|RNF105|TPRDIII|-|21q22.13|protein-coding	3567.46	0.0431938	0.110685	0.39024	0.696359	0.999987	7267	TTC3
ARCN1|COPD|SRMMD|-|11q23.3|protein-coding	7949.11	0.0359735	0.0730308	0.49258	0.622309	0.999987	372	ARCN1
MRPS31|IMOGN38|MRP-S31|S31mt|-|13q14.11|protein-coding	400.493	0.268435	0.24864	1.07961	0.280315	0.999987	10240	MRPS31
FAM120B|CCPG|KIAA1838|PGCC1|dJ894D12.1|-|6q27|protein-coding	1209.7	-0.22432	0.121768	-1.8422	0.0654464	0.999987	84498	FAM120B
LINC01561|C10orf85|-|10q26.12|ncRNA	0.343362	0.0322791	4.08047	0.00791063	0.993688	0.999987	404216	LINC01561
SERF2-C15ORF63|-|-|15q15.3|ncRNA	1318.87	-0.0293261	0.120668	-0.243032	0.807981	0.999987	100529067	SERF2-C15ORF63
AQP9|AQP-9|HsT17287|SSC1|T17287|-|15q21.3|protein-coding	2.51865	0.966078	2.30819	0.418543	0.67555	0.999987	366	AQP9
AKAP11|AKAP-11|AKAP220|PPP1R44|PRKA11|-|13q14.11|protein-coding	1710.31	0.0866248	0.114236	0.758297	0.448273	0.999987	11215	AKAP11
AIFM3|AIFL|-|22q11.21|protein-coding	3.65709	-0.504331	1.04083	-0.484549	0.627996	0.999987	150209	AIFM3
GSTA4|GSTA4-4|GTA4|-|6p12.2|protein-coding	356.136	-0.0498403	0.232549	-0.214322	0.830296	0.999987	2941	GSTA4
CEBPZOS|CEBPZ-AS1|-|2p22.2|protein-coding	887.443	0.0446328	0.113979	0.391587	0.695363	0.999987	100505876	CEBPZOS
FBLN5|ADCL2|ARCL1A|ARMD3|DANCE|EVEC|FIBL-5|HNARMD|UP50|-|14q32.12|protein-coding	10803.3	0.121222	0.207383	0.584533	0.558862	0.999987	10516	FBLN5
RNF187|RACO-1|RACO1|-|1q42.13|protein-coding	1458.82	-0.0581976	0.129502	-0.449396	0.653146	0.999987	149603	RNF187
MAMDC4|AEGP|-|9q34.3|protein-coding	29.7219	-0.0387289	0.407897	-0.0949477	0.924356	0.999987	158056	MAMDC4
GYS1|GSY|GYS|-|19q13.33|protein-coding	1475.07	-0.0758586	0.121125	-0.626282	0.53113	0.999987	2997	GYS1
ANKRD18A|-|-|9p13.1|protein-coding	0.510452	0.947767	3.21636	0.294671	0.768245	0.999987	253650	ANKRD18A
UNC5CL|MUXA|ZUD|-|6p21.1|protein-coding	0.688669	1.54297	2.95731	0.521747	0.601846	0.999987	222643	UNC5CL
GALNT13|GalNAc-T13|-|2q23.3-q24.1|protein-coding	315.028	0.29549	0.275076	1.07421	0.282728	0.999987	114805	GALNT13
SYT12|SYT11|sytXII|-|11q13.2|protein-coding	0.484064	0.9052	3.25639	0.277976	0.78103	0.999987	91683	SYT12
LOC440600|-|-|1p13.3|ncRNA	3.12369	-0.438823	1.20983	-0.362715	0.716818	0.999987	440600	LOC440600
DEDD|CASP8IP1|DEDD1|DEFT|FLDED1|KE05|-|1q23.3|protein-coding	640.225	0.00638844	0.108759	0.0587393	0.95316	0.999987	9191	DEDD
HMGN5|NBP-45|NSBP1|-|Xq21.1|protein-coding	26.7723	0.0950122	0.476239	0.199505	0.841868	0.999987	79366	HMGN5
KHDC1|C6orf147|C6orf148|Em:AC019205.8|NDG1|bA257K9.4|-|6q13|protein-coding	22.4703	-0.388425	0.493017	-0.787855	0.430782	0.999987	80759	KHDC1
LINC01607|-|-|8q21.13|ncRNA	1.15805	-0.344459	2.15427	-0.159896	0.872963	0.999987	101927067	LINC01607
MIR6840|hsa-mir-6840|-|7q22.1|ncRNA	1.83376	0.303428	1.44598	0.209842	0.833791	0.999987	102466747	MIR6840
PPM1N|-|-|19q13.32|protein-coding	7.16981	-0.749675	0.917653	-0.816949	0.413958	0.999987	147699	PPM1N
BBS4|-|-|15q24.1|protein-coding	321.501	0.167848	0.190804	0.879686	0.379029	0.999987	585	BBS4
TSC1|LAM|TSC|-|9q34.13|protein-coding	978.845	-0.112307	0.153792	-0.730256	0.465234	0.999987	7248	TSC1
RCL1|RNAC|RPCL1|-|9p24.1|protein-coding	338.743	0.114971	0.189936	0.605313	0.544971	0.999987	10171	RCL1
RGS7|-|-|1q43|1q23.1|protein-coding	76.6602	0.337085	0.333694	1.01016	0.312419	0.999987	6000	RGS7
DCC|CRC18|CRCR1|IGDCC1|MRMV1|NTN1R1|-|18q21.2|protein-coding	1.16963	3.68819	3.94488	0.934929	0.349825	0.999987	1630	DCC
U2AF1L5|-|-|21p12|protein-coding	1643.62	0.178377	0.151962	1.17383	0.240464	0.999987	102724594	U2AF1L5
CD209|CDSIGN|CLEC4L|DC-SIGN|DC-SIGN1|-|19p13.2|protein-coding	2.67276	0.441621	1.36184	0.324282	0.745724	0.999987	30835	CD209
ATP6V1H|CGI-11|MSTP042|NBP1|SFD|SFDalpha|SFDbeta|VMA13|-|8q11.23|protein-coding	1054.95	-0.0874299	0.119461	-0.731868	0.464249	0.999987	51606	ATP6V1H
TIMM44|TIM44|-|19p13.2|protein-coding	687.111	0.0120011	0.119647	0.100305	0.920102	0.999987	10469	TIMM44
LOC100289495|-|-|6q27|ncRNA	5.31286	0.746963	1.22399	0.610271	0.541682	0.999987	100289495	LOC100289495
RPP38|-|-|10p13|protein-coding	226.837	0.0967987	0.198892	0.486689	0.626479	0.999987	10557	RPP38
SMAD4|DPC4|JIP|MADH4|MYHRS|-|18q21.2|protein-coding	1106.58	0.0381293	0.119644	0.318689	0.749962	0.999987	4089	SMAD4
AFDN|AF6|MLL-AF6|MLLT4|-|6q27|protein-coding	1621.81	-0.0656596	0.15711	-0.417921	0.676005	0.999987	4301	AFDN
ASPRV1|MUNO|SASP|SASPase|Taps|-|2p13.3|protein-coding	4.18761	0.161328	1.01845	0.158405	0.874138	0.999987	151516	ASPRV1
LOC101928103|-|-|2q35|ncRNA	4.7697	0.136463	0.951303	0.143448	0.885936	0.999987	101928103	LOC101928103
SYNJ2BP|ARIP2|OMP25|-|14q24.2|protein-coding	872.57	0.0276858	0.113581	0.243754	0.807421	0.999987	55333	SYNJ2BP
KLF14|BTEB5|-|7q32.2|protein-coding	1.81207	-0.183843	1.54	-0.119379	0.904975	0.999987	136259	KLF14
LOC441455|-|-|9q22.33|pseudo	2.22489	-1.27047	2.00709	-0.632989	0.526741	0.999987	441455	LOC441455
HCN1|BCNG-1|BCNG1|EIEE24|HAC-2|-|5p12|protein-coding	0.342674	-1.87693	4.03332	-0.465356	0.641676	0.999987	348980	HCN1
TMEM51|C1orf72|-|1p36.21|protein-coding	133.91	-0.186299	0.313991	-0.593325	0.552964	0.999987	55092	TMEM51
BMF|-|-|15q15.1|protein-coding	57.4641	-0.985991	0.683649	-1.44225	0.149232	0.999987	90427	BMF
CD99L2|CD99B|MIC2L1|-|Xq28|protein-coding	1948.69	-0.0946561	0.173367	-0.545988	0.585074	0.999987	83692	CD99L2
ALG2|CDG1I|CDGIi|CMS14|CMSTA3|NET38|hALPG2|-|9q22.33|protein-coding	819.207	-0.0794218	0.120507	-0.659063	0.509856	0.999987	85365	ALG2
NDRG4|BDM1|SMAP-8|SMAP8|-|16q21|protein-coding	49.8203	-0.236406	0.378844	-0.624019	0.532615	0.999987	65009	NDRG4
SMIM11B|-|-|21p11.2|protein-coding	202.561	0.12581	0.216921	0.579981	0.561927	0.999987	102723553	SMIM11B
PPP5C|PP5|PPP5|PPT|-|19q13.32|protein-coding	1925.2	0.0981059	0.0975319	1.00589	0.314471	0.999987	5536	PPP5C
FHAD1|-|-|1p36.21|protein-coding	112.136	0.148686	0.353251	0.420908	0.673822	0.999987	114827	FHAD1
IL22RA1|CRF2-9|IL22R|IL22R1|-|1p36.11|protein-coding	0.485215	-0.840996	3.25442	-0.258416	0.796086	0.999987	58985	IL22RA1
PSPC1|PSP1|-|13q12.11|protein-coding	737.653	0.0649614	0.136133	0.477189	0.633228	0.999987	55269	PSPC1
MIR1287|MIRN1287|hsa-mir-1287|mir-1287|-|10q24.2|ncRNA	2.55352	2.03015	1.81475	1.11869	0.263271	0.999987	100302133	MIR1287
THEM4|CTMP|-|1q21.3|protein-coding	333.959	0.0740219	0.233727	0.316703	0.751469	0.999987	117145	THEM4
FNDC10|C1orf233|-|1p36.33|protein-coding	59.374	0.0343651	0.382653	0.0898074	0.92844	0.999987	643988	FNDC10
AHCYL2|ADOHCYASE3|IRBIT2|-|7q32.1|protein-coding	232.793	-0.239719	0.183555	-1.30598	0.191561	0.999987	23382	AHCYL2
PLEKHF2|EAPF|PHAFIN2|ZFYVE18|-|8q22.1|protein-coding	264.801	-0.0801651	0.198793	-0.403259	0.686758	0.999987	79666	PLEKHF2
OTUB1|HSPC263|OTB1|OTU1|-|11q13.1|protein-coding	1499.5	0.0125779	0.118111	0.106493	0.915192	0.999987	55611	OTUB1
KRTAP4-9|KAP4.9|-|17q21.2|protein-coding	33.9259	-0.473685	0.526005	-0.900532	0.367837	0.999987	100132386	KRTAP4-9
GALM|BLOCK25|GLAT|HEL-S-63p|IBD1|-|2p22.1|protein-coding	131.348	-0.304589	0.326967	-0.931557	0.351566	0.999987	130589	GALM
APOBEC3H|A3H|ARP-10|ARP10|-|22q13.1|protein-coding	0.6561	1.46959	3.77852	0.388934	0.697325	0.999987	164668	APOBEC3H
ESYT3|CHR3SYT|E-Syt3|FAM62C|-|3q22.3|protein-coding	4.35573	-0.909111	1.43571	-0.633213	0.526595	0.999987	83850	ESYT3
TRPC6|FSGS2|TRP6|-|11q22.1|protein-coding	804.326	-0.883084	0.642851	-1.3737	0.169535	0.999987	7225	TRPC6
DSE|DS-epi1|DSEP|DSEPI|EDSMC2|SART-2|SART2|-|6q22.1|protein-coding	1050.49	0.0134868	0.241482	0.05585	0.955461	0.999987	29940	DSE
IDI2-AS1|C10orf110|HT009|IDI2-AS|-|10p15.3|ncRNA	2.83207	0.903231	1.16776	0.773474	0.439242	0.999987	55853	IDI2-AS1
EDA|ECTD1|ED1|ED1-A1|ED1-A2|EDA-A1|EDA-A2|EDA1|EDA2|HED|HED1|ODT1|STHAGX1|TNLG7C|XHED|XLHED|-|Xq13.1|protein-coding	8.9204	-0.0813426	0.755748	-0.107632	0.914288	0.999987	1896	EDA
CCDC69|-|-|5q33.1|protein-coding	67.248	0.520029	0.55686	0.933859	0.350377	0.999987	26112	CCDC69
PSME4|PA200|-|2p16.2|protein-coding	3407.71	0.200841	0.157455	1.27555	0.202115	0.999987	23198	PSME4
LGALS4|GAL4|L36LBP|-|19q13.2|protein-coding	1.17181	1.45271	2.64445	0.549343	0.58277	0.999987	3960	LGALS4
UCN2|SRP|UCN-II|UCNI|UR|URP|-|3p21.31|protein-coding	6.31013	-0.298037	0.983799	-0.302945	0.761932	0.999987	90226	UCN2
PHLDB1|LL5A|-|11q23.3|protein-coding	1792.55	-0.198993	0.170435	-1.16756	0.242984	0.999987	23187	PHLDB1
RSPH3|CILD32|RSHL2|RSP3|dJ111C20.1|-|6q25.3|protein-coding	155.785	-0.0305371	0.217597	-0.140338	0.888393	0.999987	83861	RSPH3
FAM103A1|C15orf18|HsT19360|RAM|-|15q25.2|protein-coding	137.013	-0.0281572	0.217964	-0.129183	0.897213	0.999987	83640	FAM103A1
LOC100419583|-|-|15q21.1|pseudo	268.027	-0.238459	0.151867	-1.57018	0.116373	0.999987	100419583	LOC100419583
EPB41L4A-AS1|C5orf26|NCRNA00219|TIGA1|-|5q22.1|ncRNA	169.35	0.074064	0.280368	0.264167	0.791651	0.999987	114915	EPB41L4A-AS1
DHCR7|SLOS|-|11q13.4|protein-coding	2323.17	0.223302	0.212671	1.04999	0.293723	0.999987	1717	DHCR7
TNXB|EDS3|HXBL|TENX|TN-X|TNX|TNXB1|TNXB2|TNXBS|VUR8|XB|XBS|-|6p21.33-p21.32|protein-coding	67.7676	0.601028	0.566145	1.06161	0.288411	0.999987	7148	TNXB
TAF5|TAF(II)100|TAF2D|TAFII-100|TAFII100|-|10q24.33|protein-coding	211.616	0.203541	0.176967	1.15016	0.250076	0.999987	6877	TAF5
SPACA9|C9orf9|Mast|-|9q34.13|protein-coding	74.563	-0.410468	0.284666	-1.44192	0.149324	0.999987	11092	SPACA9
LOXL3|LOXL|-|2p13.1|protein-coding	619.276	-0.192813	0.359249	-0.53671	0.591468	0.999987	84695	LOXL3
IQSEC2|BRAG1|MRX1|MRX18|MRX78|-|Xp11.22|protein-coding	129.29	-0.241599	0.226799	-1.06525	0.286761	0.999987	23096	IQSEC2
CCNB2|HsT17299|-|15q22.2|protein-coding	1046.72	0.234846	0.22579	1.04011	0.29829	0.999987	9133	CCNB2
EXOC6|EXOC6A|SEC15|SEC15L|SEC15L1|SEC15L3|Sec15p|-|10q23.33|protein-coding	585.473	-0.136814	0.237264	-0.576633	0.564188	0.999987	54536	EXOC6
SKA2|FAM33A|-|17q22|protein-coding	941.311	0.0443867	0.134028	0.331175	0.740512	0.999987	348235	SKA2
ZNF419|ZAPHIR|ZNF419A|-|19q13.43|protein-coding	83.5025	-0.213452	0.281527	-0.758195	0.448334	0.999987	79744	ZNF419
CDAN1|CDA1|CDAI|CDAN1A|DLT|PRO1295|-|15q15.2|protein-coding	327.636	-0.029197	0.186289	-0.156729	0.875458	0.999987	146059	CDAN1
FSTL1|FRP|FSL1|MIR198|OCC-1|OCC1|tsc36|-|3q13.33|protein-coding	46899.1	-0.199224	0.190334	-1.04671	0.295234	0.999987	11167	FSTL1
PFKP|ATP-PFK|PFK-C|PFK-P|PFKF|-|10p15.2|protein-coding	4207.9	-0.114994	0.0859138	-1.33848	0.180739	0.999987	5214	PFKP
ZNF155|pHZ-96|-|19q13.31|protein-coding	141.162	-0.143681	0.236677	-0.607077	0.5438	0.999987	7711	ZNF155
KLF17|ZNF393|Zfp393|-|1p34.1|protein-coding	0.490835	-2.40338	3.99506	-0.601589	0.547448	0.999987	128209	KLF17
LYN|JTK8|p53Lyn|p56Lyn|-|8q12.1|protein-coding	352.729	-0.70125	0.380618	-1.8424	0.0654174	0.999987	4067	LYN
MATN1-AS1|-|-|1p35.2|ncRNA	2.43845	-0.954541	1.39809	-0.682744	0.494769	0.999987	100129196	MATN1-AS1
FOS|AP-1|C-FOS|p55|-|14q24.3|protein-coding	50.8905	0.240968	0.658012	0.366206	0.714212	0.999987	2353	FOS
ITPKB|IP3-3KB|IP3K|IP3K-B|IP3KB|PIG37|-|1q42.12|protein-coding	210.163	-0.287647	0.331016	-0.868984	0.384856	0.999987	3707	ITPKB
C9orf47|C9orf108|bA791O21.3|-|9q22.1|protein-coding	15.631	0.539096	0.56926	0.947011	0.343633	0.999987	286223	C9orf47
SLC38A7|SNAT7|-|16q21|protein-coding	743.905	-0.269933	0.19322	-1.39703	0.162405	0.999987	55238	SLC38A7
TMC4|-|-|19q13.42|protein-coding	3.55183	0.152129	1.16615	0.130454	0.896207	0.999987	147798	TMC4
KANK1|ANKRD15|CPSQ2|KANK|-|9p24.3|protein-coding	1710.17	-0.290745	0.245895	-1.18239	0.23705	0.999987	23189	KANK1
SCN5A|CDCD2|CMD1E|CMPD2|HB1|HB2|HBBD|HH1|ICCD|IVF|LQT3|Nav1.5|PFHB1|SSS1|VF1|-|3p22.2|protein-coding	4.73561	-0.882678	1.05618	-0.835726	0.403309	0.999987	6331	SCN5A
PDE4D|ACRDYS2|DPDE3|HSPDE4D|PDE43|PDE4DN2|STRK1|-|5q11.2-q12.1|protein-coding	133.035	0.519972	0.409921	1.26847	0.204631	0.999987	5144	PDE4D
PRAME|CT130|MAPE|OIP-4|OIP4|-|22q11.22|protein-coding	0.926126	-3.32327	3.95368	-0.840551	0.4006	0.999987	23532	PRAME
KIAA0922|TMEM131L|-|4q31.3|protein-coding	534.612	0.122333	0.192251	0.63632	0.524568	0.999987	23240	KIAA0922
TTLL11|C9orf20|bA244O19.1|-|9q33.2|protein-coding	292.491	-0.141736	0.304683	-0.465191	0.641794	0.999987	158135	TTLL11
HES1|HES-1|HHL|HRY|bHLHb39|-|3q29|protein-coding	78.6219	-0.602194	0.467131	-1.28913	0.197352	0.999987	3280	HES1
C4orf3|HCVFTP1|-|4q26|protein-coding	1659.66	-0.0708997	0.132471	-0.535209	0.592505	0.999987	401152	C4orf3
ZNF345|HZF10|-|19q13.12|protein-coding	30.8198	0.0137765	0.390564	0.0352733	0.971862	0.999987	25850	ZNF345
TRIM52|RNF102|-|5q35.3|protein-coding	199.955	-0.160561	0.200755	-0.799788	0.423834	0.999987	84851	TRIM52
GNRH2|GnRH-II|LH-RHII|-|20p13|protein-coding	1.35463	0.0550723	1.85097	0.0297533	0.976264	0.999987	2797	GNRH2
MRPS18B|C6orf14|HSPC183|HumanS18a|MRP-S18-2|MRPS18-2|PTD017|S18amt|-|6p21.33|protein-coding	1101.1	0.132058	0.178099	0.741489	0.458397	0.999987	28973	MRPS18B
GRAMD4|DIP|dA59H18.1|dJ439F8.1|-|22q13.31|protein-coding	149.762	0.0969691	0.208028	0.466136	0.641118	0.999987	23151	GRAMD4
PKLR|PK1|PKL|PKR|PKRL|RPK|-|1q22|protein-coding	0.844174	-0.514784	2.40037	-0.21446	0.830188	0.999987	5313	PKLR
ROBO1|DUTT1|SAX3|-|3p12.3|protein-coding	848.81	-0.0308538	0.157143	-0.196342	0.844342	0.999987	6091	ROBO1
RNF111|ARK|-|15q22.1-q22.2|protein-coding	782.4	-0.104634	0.125475	-0.833906	0.404334	0.999987	54778	RNF111
SCRN1|SES1|-|7p14.3|protein-coding	6501.6	-0.141432	0.0916357	-1.54342	0.12273	0.999987	9805	SCRN1
CBWD6|-|-|9p11.2|protein-coding	14.5509	0.726959	0.660059	1.10135	0.270742	0.999987	644019	CBWD6
SULF2|HSULF-2|-|20q13.12|protein-coding	27.7345	-0.326102	0.586503	-0.556011	0.578203	0.999987	55959	SULF2
BCL2A1|ACC-1|ACC-2|ACC1|ACC2|BCL2L5|BFL1|GRS|HBPA1|-|15q25.1|protein-coding	10.9425	0.864112	0.762344	1.13349	0.257007	0.999987	597	BCL2A1
IFFO1|HOM-TES-103|IFFO|-|12p13.31|protein-coding	1008.31	-0.0880013	0.151953	-0.579135	0.562498	0.999987	25900	IFFO1
IQCH|NYDSP5|-|15q23|protein-coding	30.4151	-0.114479	0.430491	-0.265928	0.790295	0.999987	64799	IQCH
MRPS18A|HumanS18b|MRP-S18-3|MRPS18-3|S18bmt|-|6p21.1|protein-coding	480.436	0.0221284	0.143889	0.153787	0.877777	0.999987	55168	MRPS18A
ARHGAP42|GRAF3|-|11q22.1|protein-coding	115.695	0.0472357	0.269603	0.175205	0.860919	0.999987	143872	ARHGAP42
ZNF454|-|-|5q35.3|protein-coding	10.2562	0.180607	0.764628	0.236203	0.813275	0.999987	285676	ZNF454
CCT6A|CCT-zeta|CCT-zeta-1|CCT6|Cctz|HTR3|MoDP-2|TCP-1-zeta|TCP20|TCPZ|TTCP20|-|7p11.2|protein-coding	7881.93	0.147565	0.15437	0.955918	0.339113	0.999987	908	CCT6A
PRKG1|AAT8|PKG|PRKG1B|PRKGR1B|cGK|cGK 1|cGK1|cGKI|cGKI-BETA|cGKI-alpha|-|10q11.23-q21.1|protein-coding	237.917	-0.371879	0.36242	-1.0261	0.304845	0.999987	5592	PRKG1
MUSK|CMS9|FADS|-|9q31.3|protein-coding	5.43739	-0.0655464	0.980409	-0.0668562	0.946696	0.999987	4593	MUSK
COL4A4|CA44|-|2q36.3|protein-coding	9.14184	1.47195	0.796051	1.84906	0.0644487	0.999987	1286	COL4A4
PRDM6|KMT8C|PDA3|PRISM|-|5q23.2|protein-coding	2.50649	-0.194131	1.62273	-0.119632	0.904774	0.999987	93166	PRDM6
CDH10|-|-|5p14.2-p14.1|protein-coding	2.34868	0.45906	1.51167	0.303677	0.761374	0.999987	1008	CDH10
PRCC|RCCP1|TPRC|-|1q23.1|protein-coding	865.616	-0.0151534	0.117012	-0.129503	0.896959	0.999987	5546	PRCC
OAZ1|AZI|OAZ|-|19p13.3|protein-coding	11816	0.13449	0.0798977	1.68327	0.0923221	0.999987	4946	OAZ1
ZNF761|ZNF468|-|19q13.42|protein-coding	309.71	0.0459441	0.201433	0.228086	0.819579	0.999987	388561	ZNF761
DNM1L|DLP1|DRP1|DVLP|DYMPLE|EMPF|EMPF1|HDYNIV|-|12p11.21|protein-coding	2604.55	0.0498823	0.082021	0.608165	0.543078	0.999987	10059	DNM1L
C1orf21|PIG13|-|1q25.3|protein-coding	238.94	-0.0614951	0.294644	-0.208709	0.834675	0.999987	81563	C1orf21
CMTM6|CKLFSF6|PRO2219|-|3p22.3|protein-coding	3101.05	-0.0275773	0.0931958	-0.295907	0.767301	0.999987	54918	CMTM6
NSUN7|-|-|4p14|protein-coding	0.350242	1.94074	4.03333	0.481175	0.630392	0.999987	79730	NSUN7
MRVI1-AS1|-|-|11p15.4|ncRNA	2.19604	-0.135526	1.9484	-0.0695574	0.944546	0.999987	100129827	MRVI1-AS1
ZNF571-AS1|-|-|19q13.12|ncRNA	41.0095	-0.565147	0.350087	-1.61431	0.106461	0.999987	100507433	ZNF571-AS1
NSF|SKD2|-|17q21.31|protein-coding	1833.83	-0.0999171	0.126802	-0.787979	0.430709	0.999987	4905	NSF
SV2B|HsT19680|-|15q26.1|protein-coding	0.33418	1.88175	4.03853	0.46595	0.641251	0.999987	9899	SV2B
MED12|ARC240|CAGH45|FGS1|HOPA|MED12S|OHDOX|OKS|OPA1|TNRC11|TRAP230|-|Xq13.1|protein-coding	600.518	-0.199479	0.147267	-1.35454	0.175564	0.999987	9968	MED12
LINC00200|C10orf139|NCRNA00200|-|10p15.3|ncRNA	0.517332	2.50758	3.95065	0.634725	0.525608	0.999987	399706	LINC00200
NUGGC|C8orf80|HMFN0672|SLIP-GC|-|8p21.1|protein-coding	0.65207	-1.40779	2.98616	-0.471438	0.637328	0.999987	389643	NUGGC
SOX6|HSSOX6|SOXD|-|11p15.2|protein-coding	3.54922	-4.22014	2.20195	-1.91655	0.0552957	0.999987	55553	SOX6
ENTPD3-AS1|-|-|3p22.1|ncRNA	8.03357	-0.0827564	0.765827	-0.108061	0.913947	0.999987	285266	ENTPD3-AS1
IMPA1|IMP|IMPA|-|8q21.13|protein-coding	531.209	-0.15459	0.17528	-0.881959	0.377799	0.999987	3612	IMPA1
LMTK2|AATYK2|BREK|KPI-2|KPI2|LMR2|PPP1R100|cprk|hBREK|-|7q21.3|protein-coding	462.69	-0.032982	0.118364	-0.278649	0.780514	0.999987	22853	LMTK2
RANBP3|-|-|19p13.3|protein-coding	909.993	0.0472415	0.112761	0.418954	0.67525	0.999987	8498	RANBP3
RNF145|-|-|5q33.3|protein-coding	1947.9	-0.0591663	0.165422	-0.357668	0.720591	0.999987	153830	RNF145
CNIH2|CNIH-2|Cnil|-|11q13.2|protein-coding	1.32584	-0.739921	1.80464	-0.41001	0.681798	0.999987	254263	CNIH2
USP27X-AS1|-|-|Xp11.23|ncRNA	13.166	-0.239551	0.611771	-0.39157	0.695376	0.999987	158572	USP27X-AS1
AKT1S1|Lobe|PRAS40|-|19q13.33|protein-coding	1067.92	-0.0420936	0.128275	-0.328151	0.742797	0.999987	84335	AKT1S1
MEI1|SPATA38|-|22q13.2|protein-coding	37.3686	-0.178337	0.52318	-0.340871	0.7332	0.999987	150365	MEI1
LOC102724593|-|-|10q11.22|ncRNA	1.67344	-1.1742	1.66034	-0.707209	0.479437	0.999987	102724593	LOC102724593
KIF3A|FLA10|KLP-20|-|5q31.1|protein-coding	437.787	-0.204559	0.184165	-1.11074	0.266681	0.999987	11127	KIF3A
NBPF10|AB6|AG1|NBPF9|-|1q21.1|protein-coding	87.296	0.158475	0.262069	0.604706	0.545375	0.999987	100132406	NBPF10
PLEKHG4|ARHGEF44|PRTPHN1|SCA4|-|16q22.1|protein-coding	777.336	-0.0796988	0.140672	-0.566559	0.571014	0.999987	25894	PLEKHG4
GSPT1|551G9.2|ETF3A|GST1|eRF3a|-|16p13.13|protein-coding	5010.7	0.0889826	0.128377	0.693135	0.488225	0.999987	2935	GSPT1
GRWD1|CDW4|GRWD|RRB1|WDR28|-|19q13.33|protein-coding	973.56	0.170323	0.115016	1.48086	0.138643	0.999987	83743	GRWD1
SNORD58A|RNU58A|U58a|-|18q21.1|snoRNA	7.15257	0.369629	0.791012	0.467286	0.640295	0.999987	26791	SNORD58A
CYP4F3|CPF3|CYP4F|LTB4H|-|19p13.12|protein-coding	1.79601	-0.201804	1.5385	-0.131169	0.895642	0.999987	4051	CYP4F3
TRMT12|TRM12|TYW2|-|8q24.13|protein-coding	205.07	-0.108639	0.180752	-0.601039	0.547814	0.999987	55039	TRMT12
ANAPC11|APC11|Apc11p|HSPC214|-|17q25.3|protein-coding	1001.26	0.0655548	0.130458	0.502497	0.615318	0.999987	51529	ANAPC11
WRN|RECQ3|RECQL2|RECQL3|-|8p12|protein-coding	727.616	0.0468393	0.148803	0.314774	0.752933	0.999987	7486	WRN
RP2|DELXp11.3|NM23-H10|NME10|TBCCD2|XRP2|-|Xp11.3|protein-coding	995.862	-0.0844567	0.110695	-0.762971	0.445481	0.999987	6102	RP2
SNHG11|C20orf198|LINC00101|NCRNA00101|-|20q11.23|ncRNA	88.6312	0.0150274	0.266992	0.056284	0.955116	0.999987	128439	SNHG11
UBE2F|NCE2|-|2q37.3|protein-coding	795.336	-0.0627955	0.114178	-0.549977	0.582335	0.999987	140739	UBE2F
TTLL6|TTL.6|-|17q21.32|protein-coding	2.42341	0.298663	1.90775	0.156553	0.875597	0.999987	284076	TTLL6
PDE9A|HSPDE9A2|-|21q22.3|protein-coding	2.10425	-0.606373	2.35007	-0.258023	0.796389	0.999987	5152	PDE9A
SLCO3A1|OATP-D|OATP-RP3|OATP3A1|OATPD|OATPRP3|SLC21A11|-|15q26.1|protein-coding	222.676	-0.358538	0.317096	-1.13069	0.258185	0.999987	28232	SLCO3A1
ZBED9|Buster4|SCAND3|ZFP38-L|ZNF305P2|ZNF452|dJ1186N24.3|-|6p22.1|protein-coding	1.29761	0.765352	2.16217	0.353974	0.723358	0.999987	114821	ZBED9
AKAP7|AKAP15|AKAP18|-|6q23.2|protein-coding	113.828	0.229011	0.280644	0.816022	0.414488	0.999987	9465	AKAP7
KRTAP4-11|KAP4.11|KAP4.14|KRTAP4-14|KRTAP4.14|-|17q21.2|protein-coding	2.17873	-1.14245	1.38125	-0.827113	0.408173	0.999987	653240	KRTAP4-11
SPATA9|NYD-SP16|-|5q15|protein-coding	56.2494	-0.232386	0.398743	-0.582796	0.56003	0.999987	83890	SPATA9
ZHX3|TIX1|-|20q12|protein-coding	2556.01	-0.0344131	0.169556	-0.20296	0.839166	0.999987	23051	ZHX3
POLQ|PRO0327|-|3q13.33|protein-coding	524.452	0.127839	0.198668	0.643478	0.519914	0.999987	10721	POLQ
LOC105369332|-|-|11q12.3|ncRNA	0.514698	-0.900189	3.21203	-0.280255	0.779282	0.999987	105369332	LOC105369332
ARHGAP10|GRAF2|PS-GAP|PSGAP|-|4q31.23|protein-coding	842.904	0.0912216	0.133127	0.685224	0.493203	0.999987	79658	ARHGAP10
DDX3X|CAP-Rf|DBX|DDX14|DDX3|HLP2|MRX102|-|Xp11.4|protein-coding	9316.95	-0.206229	0.153541	-1.34315	0.179223	0.999987	1654	DDX3X
IGFBP7-AS1|-|-|4q12|ncRNA	1.36966	-0.691055	2.58435	-0.267401	0.789161	0.999987	255130	IGFBP7-AS1
ZNF2|A1-5|ZNF661|Zfp661|-|2q11.1|protein-coding	109.632	-0.0132723	0.280089	-0.0473859	0.962206	0.999987	7549	ZNF2
CADPS|CADPS1|CAPS|CAPS1|UNC-31|-|3p14.2|protein-coding	2.77125	0.940225	1.55621	0.604176	0.545727	0.999987	8618	CADPS
SH3BP1|ARHGAP43|-|22q13.1|protein-coding	118.342	0.0113767	0.215379	0.0528218	0.957874	0.999987	23616	SH3BP1
CCM2|C7orf22|OSM|PP10187|-|7p13|protein-coding	1146.96	-0.00971596	0.111713	-0.0869723	0.930694	0.999987	83605	CCM2
TRIM32|BBS11|HT2A|LGMD2H|TATIP|-|9q33.1|protein-coding	533.605	-0.0297315	0.163557	-0.181781	0.855755	0.999987	22954	TRIM32
RANBP9|BPM-L|BPM90|RANBPM|RanBP7|-|6p23|protein-coding	1032.88	0.00928826	0.107784	0.0861744	0.931328	0.999987	10048	RANBP9
ZMYM6|Buster2|MYM|ZBED7|ZNF198L4|ZNF258|-|1p34.3|protein-coding	472.144	0.152166	0.137736	1.10476	0.269263	0.999987	9204	ZMYM6
ZNF557|-|-|19p13.2|protein-coding	153.717	0.142978	0.183372	0.779712	0.435561	0.999987	79230	ZNF557
NOMO2|Nomo|PM5|-|16p12.3|protein-coding	286.652	-0.309332	0.176306	-1.75452	0.0793416	0.999987	283820	NOMO2
ZMIZ1-AS1|-|-|10q22.3|ncRNA	3.96352	0.723212	1.39613	0.518013	0.604449	0.999987	283050	ZMIZ1-AS1
ZNF791|-|-|19p13.13|protein-coding	277.576	-0.0455535	0.157511	-0.289209	0.772422	0.999987	163049	ZNF791
SPEF1|C20orf28|CLAMP|SPEF1A|-|20p13|protein-coding	0.338427	0.0322791	4.08047	0.00791063	0.993688	0.999987	25876	SPEF1
GLI2|CJS|HPE9|PHS2|THP1|THP2|-|2q14.2|protein-coding	86.4152	-0.100963	0.361992	-0.278908	0.780315	0.999987	2736	GLI2
BCAS3|GAOB1|MAAB|-|17q23.2|protein-coding	234.814	-0.16765	0.175134	-0.957264	0.338434	0.999987	54828	BCAS3
GNA12|NNX3|RMP|gep|-|7p22.3-p22.2|protein-coding	2328.16	-0.0947332	0.0984116	-0.962622	0.335737	0.999987	2768	GNA12
PTCD2|-|-|5q13.2|protein-coding	227.901	0.201552	0.160376	1.25675	0.208846	0.999987	79810	PTCD2
SNORD45C|U45C|-|1p31.1|snoRNA	0.809304	1.89512	2.84323	0.666537	0.505068	0.999987	692085	SNORD45C
TAPBP|NGS17|TAPA|TPN|TPSN|-|6p21.32|protein-coding	1450.26	-0.248486	0.153042	-1.62364	0.104452	0.999987	6892	TAPBP
USP9X|DFFRX|FAF|FAM|MRX99|MRXS99F|-|Xp11.4|protein-coding	3574.7	-0.240328	0.108671	-2.21151	0.0270006	0.999987	8239	USP9X
ANGPT4|ANG3|ANG4|-|20p13|protein-coding	0.339577	-1.86549	4.03431	-0.462406	0.64379	0.999987	51378	ANGPT4
ZNF221|-|-|19q13.31|protein-coding	37.0937	-0.587079	0.373172	-1.57321	0.11567	0.999987	7638	ZNF221
NCAM1|CD56|MSK39|NCAM|-|11q23.2|protein-coding	34.7076	-0.231593	0.715541	-0.323661	0.746195	0.999987	4684	NCAM1
JMY|WHAMM2|WHDC1L3|-|5q14.1|protein-coding	193.819	0.297988	0.189696	1.57087	0.116212	0.999987	133746	JMY
CXorf58|-|-|Xp22.11|protein-coding	0.675933	0.0890354	3.02142	0.0294681	0.976491	0.999987	254158	CXorf58
TXLNGY|CYorf15A|CYorf15B|TXLNG2P|-|Yq11.222-q11.223|pseudo	142.142	1.29197	3.29234	0.392417	0.69475	0.999987	246126	TXLNGY
DHX32|DDX32|DHLP1|-|10q26.2|protein-coding	789.454	-0.0964388	0.119027	-0.810229	0.417808	0.999987	55760	DHX32
PLS1|-|-|3q23|protein-coding	13.6863	0.28526	0.607313	0.469708	0.638563	0.999987	5357	PLS1
ZNF366|DCSCRIPT|-|5q13.2|5q13.2|protein-coding	203.453	-0.359077	0.882273	-0.40699	0.684015	0.999987	167465	ZNF366
MIR503HG|H19X|MIR503HG2|-|Xq26.3|ncRNA	106.887	-0.229241	0.306237	-0.748574	0.454114	0.999987	84848	MIR503HG
LOC154761|-|-|7q35|pseudo	8.09572	-0.635059	0.817398	-0.776928	0.437201	0.999987	154761	LOC154761
TMEM232|-|-|5q22.1|protein-coding	3.80845	0.164648	1.03272	0.159432	0.873329	0.999987	642987	TMEM232
CRHR1-IT1|C17orf69|MGC57346|-|17q21.31|ncRNA	157.777	-0.195878	0.560992	-0.349164	0.726966	0.999987	147081	CRHR1-IT1
LIAS|HGCLAS|HUSSY-01|LAS|LIP1|LS|PDHLD|-|4p14|protein-coding	199.042	0.313273	0.222084	1.4106	0.158361	0.999987	11019	LIAS
EMBP1|-|-|1p11.2|pseudo	0.339577	-1.86549	4.03431	-0.462406	0.64379	0.999987	647121	EMBP1
ARMC9|ARM|KU-MEL-1|NS21|-|2q37.1|protein-coding	468.322	-0.341232	0.248818	-1.37141	0.170246	0.999987	80210	ARMC9
TBC1D3E|TBC1DE3|-|17q12|protein-coding	4.32683	0.0127378	1.00305	0.0126991	0.989868	0.999987	102723859	TBC1D3E
PDCD7|ES18|HES18|-|15q22.31|protein-coding	546.094	0.0951221	0.141483	0.672322	0.501379	0.999987	10081	PDCD7
LAT2|HSPC046|LAB|NTAL|WBSCR15|WBSCR5|WSCR5|-|7q11.23|protein-coding	9.33612	-0.280195	0.686968	-0.407871	0.683368	0.999987	7462	LAT2
FLOT1|-|-|6p21.33|protein-coding	2079.33	0.0449277	0.214749	0.209211	0.834284	0.999987	10211	FLOT1
PPCS|-|-|1p34.2|protein-coding	464.179	-0.104361	0.125713	-0.830156	0.40645	0.999987	79717	PPCS
METTL21A|FAM119A|HCA557b|HSPA-KMT|-|2q33.3|protein-coding	110.627	0.188425	0.220218	0.855626	0.392204	0.999987	151194	METTL21A
ATP5SL|-|-|19q13.2|protein-coding	869.993	-0.0827834	0.105197	-0.786939	0.431318	0.999987	55101	ATP5SL
CEACAM3|CD66D|CEA|CGM1|W264|W282|-|19q13.2|protein-coding	0.339577	-1.86549	4.03431	-0.462406	0.64379	0.999987	1084	CEACAM3
MGLL|HU-K5|HUK5|MAGL|MGL|-|3q21.3|protein-coding	9537.67	0.172162	0.100168	1.71874	0.0856621	0.999987	11343	MGLL
NR5A2|B1F|B1F2|CPF|FTF|FTZ-F1|FTZ-F1beta|LRH-1|LRH1|hB1F-2|-|1q32.1|protein-coding	848.139	-0.534429	0.938007	-0.569749	0.568848	0.999987	2494	NR5A2
IARS|GRIDHH|IARS1|ILERS|ILRS|IRS|PRO0785|-|9q22.31|protein-coding	6562.53	0.0745466	0.0958916	0.777405	0.43692	0.999987	3376	IARS
LINC00680|-|-|6p11.2|ncRNA	65.3287	0.16335	0.361289	0.452132	0.651174	0.999987	106660612	LINC00680
LOC100130950|-|-|17p13.2|ncRNA	10.6383	0.121617	0.628994	0.193352	0.846683	0.999987	100130950	LOC100130950
TFB1M|CGI-75|CGI75|mtTFB|mtTFB1|-|6q25.3|protein-coding	870.957	-0.0303098	0.286101	-0.105941	0.915629	0.999987	51106	TFB1M
CHN1|ARHGAP2|CHN|DURS2|NC|RHOGAP2|-|2q31.1|protein-coding	174.652	0.690171	0.443812	1.5551	0.119923	0.999987	1123	CHN1
ZNF74|COS52|ZFP520|ZNF520|hZNF7|-|22q11.21|protein-coding	117.777	0.0528571	0.233694	0.22618	0.821061	0.999987	7625	ZNF74
RAB4B-EGLN2|RERT-lncRNA|-|19q13.2|ncRNA	1292.59	-0.0682228	0.131157	-0.520163	0.60295	0.999987	100529264	RAB4B-EGLN2
TMEM14A|C6orf73|PTD011|-|6p12.2|protein-coding	208.245	0.0694179	0.245276	0.28302	0.777162	0.999987	28978	TMEM14A
LOC102723557|-|-|5q23.2|ncRNA	0.335331	0.0322791	4.08047	0.00791063	0.993688	0.999987	102723557	LOC102723557
IFITM2|1-8D|DSPA2c|-|11p15.5|protein-coding	3807.41	0.0444388	0.319174	0.139231	0.889268	0.999987	10581	IFITM2
COQ10B|-|-|2q33.1|protein-coding	703.636	-0.0518843	0.152019	-0.341302	0.732876	0.999987	80219	COQ10B
THNSL1|TSH1|-|10p12.1|protein-coding	121.144	0.321112	0.218508	1.46957	0.141678	0.999987	79896	THNSL1
RPS6|S6|-|9p22.1|protein-coding	19781.8	0.0646959	0.107556	0.601512	0.547499	0.999987	6194	RPS6
FNTA|FPTA|PGGT1A|PTAR2|-|8p11.21|protein-coding	1160.21	-0.00398853	0.0991377	-0.0402322	0.967908	0.999987	2339	FNTA
ALB|HSA|PRO0883|PRO0903|PRO1341|-|4q13.3|protein-coding	0.32971	1.86485	4.04005	0.46159	0.644375	0.999987	213	ALB
ZNF213-AS1|-|-|16p13.3|ncRNA	23.6421	0.733995	0.451546	1.62551	0.104053	0.999987	100507458	ZNF213-AS1
AFF2|FMR2|FMR2P|FRAXE|MRX2|OX19|-|Xq28|protein-coding	2.68435	2.14352	1.53033	1.40069	0.161306	0.999987	2334	AFF2
ZBTB16|PLZF|ZNF145|-|11q23.2|protein-coding	145.797	-0.28037	0.244485	-1.14678	0.251474	0.999987	7704	ZBTB16
PARM1|Cipar1|DKFZP564O0823|PARM-1|WSC4|-|4q13.3|protein-coding	0.661022	-1.44936	2.51884	-0.575407	0.565016	0.999987	25849	PARM1
PPP1R37|LRRC68|-|19q13.32|protein-coding	358.374	-0.0181885	0.138878	-0.130968	0.895801	0.999987	284352	PPP1R37
CDK2AP2|DOC-1R|p14|-|11q13.2|protein-coding	398.761	-0.00303164	0.189535	-0.0159951	0.987238	0.999987	10263	CDK2AP2
TOP1P1|-|-|1q24.3|pseudo	4.18531	0.151822	1.05985	0.143248	0.886094	0.999987	7151	TOP1P1
RALGAPA1|GARNL1|GRIPE|RalGAPalpha1|TULIP1|p240|-|14q13.2|protein-coding	214.233	-0.024504	0.219013	-0.111884	0.910915	0.999987	253959	RALGAPA1
TEKT3|-|-|17p12|protein-coding	0.826503	-1.85111	2.77766	-0.666426	0.505139	0.999987	64518	TEKT3
FRS2|FRS1A|FRS2A|FRS2alpha|SNT|SNT-1|SNT1|-|12q15|protein-coding	577.436	0.0373611	0.112005	0.333566	0.738707	0.999987	10818	FRS2
BIVM-ERCC5|ERCC5-202|-|13q33.1|protein-coding	1680.04	-0.0251221	0.095757	-0.262353	0.79305	0.999987	100533467	BIVM-ERCC5
FAM46A|C6orf37|XTP11|-|6q14.1|protein-coding	599.697	-0.0512185	0.328018	-0.156145	0.875919	0.999987	55603	FAM46A
LINGO2|LERN3|LRRN6C|-|9p21.2-p21.1|protein-coding	0.510452	0.947767	3.21636	0.294671	0.768245	0.999987	158038	LINGO2
NSG1|D4S234|D4S234E|NEEP21|P21|-|4p16.3|protein-coding	63.6652	1.23585	0.907448	1.3619	0.173229	0.999987	27065	NSG1
SLC41A3|SLC41A1-L2|-|3q21.2-q21.3|protein-coding	655.152	0.00402563	0.145248	0.0277156	0.977889	0.999987	54946	SLC41A3
CCDC188|-|-|22q11.21|protein-coding	14.2686	0.196984	0.600357	0.328112	0.742827	0.999987	388849	CCDC188
DPY30|Cps25|HDPY-30|Saf19|-|2p22.3|protein-coding	581.13	0.123959	0.137262	0.903083	0.366482	0.999987	84661	DPY30
NDOR1|NR1|bA350O14.9|-|9q34.3|protein-coding	308.288	0.0648049	0.189291	0.342355	0.732083	0.999987	27158	NDOR1
DLGAP1|DAP-1|DAP-1-ALPHA|DAP-1-BETA|DAP1|DLGAP1A|DLGAP1B|GKAP|SAPAP1|-|18p11.31|protein-coding	9.61836	-0.499644	0.877196	-0.569592	0.568954	0.999987	9229	DLGAP1
RPRD1A|HsT3101|P15RS|-|18q12.2|protein-coding	1078.69	0.218491	0.133433	1.63746	0.101535	0.999987	55197	RPRD1A
LRTOMT|CFAP111|DFNB63|LRRC51|-|11q13.4|protein-coding	35.9032	0.0921832	0.370611	0.248733	0.803568	0.999987	220074	LRTOMT
TMED7-TICAM2|-|-|5q22.3|protein-coding	1522.02	0.0034012	0.109687	0.0310083	0.975263	0.999987	100302736	TMED7-TICAM2
MIR30C2|MIRN30C2|mir-30c-2|-|6q13|ncRNA	0.342211	1.91147	4.03588	0.473618	0.635773	0.999987	407032	MIR30C2
ARPIN|C15orf38|-|15q26.1|protein-coding	677.571	0.152466	0.118261	1.28923	0.197316	0.999987	348110	ARPIN
KIAA1161|NET37|-|9p13.3|protein-coding	78.8539	-0.162913	0.315832	-0.515823	0.605978	0.999987	57462	KIAA1161
MIR1181|MIRN1181|hsa-mir-1181|-|19p13.2|ncRNA	0.476949	-2.36579	3.99736	-0.591838	0.553959	0.999987	100302213	MIR1181
STXBP5|LGL3|LLGL3|Nbla04300|-|6q24.3|protein-coding	3084.77	0.0253087	0.121403	0.208468	0.834864	0.999987	134957	STXBP5
TRPV6|ABP/ZF|CAT1|CATL|ECAC2|HSA277909|LP6728|ZFAB|-|7q34|protein-coding	0.32971	1.86485	4.04005	0.46159	0.644375	0.999987	55503	TRPV6
IGBP1|ALPHA-4|IBP1|-|Xq13.1|protein-coding	809.89	-0.0605569	0.127679	-0.474289	0.635294	0.999987	3476	IGBP1
CYP26A1|CP26|CYP26|P450RAI|P450RAI1|-|10q23.33|protein-coding	0.667216	1.5325	2.98018	0.514231	0.607091	0.999987	1592	CYP26A1
LOC101929550|-|-|8p12|ncRNA	0.67663	-1.50169	3.76129	-0.399248	0.689711	0.999987	101929550	LOC101929550
LINC01600|C6orf195|bA145H9.2|-|6p25.2|ncRNA	0.996937	2.22686	2.72605	0.816883	0.413996	0.999987	154386	LINC01600
SNORD2|R39B|SNR39B|-|3q27.3|snoRNA	26.5056	0.04786	0.531807	0.0899951	0.928291	0.999987	619567	SNORD2
MCM3AP|GANP|MAP80|SAC3|-|21q22.3|protein-coding	2317.9	0.221615	0.084358	2.62707	0.00861224	0.999987	8888	MCM3AP
TCEANC2|C1orf83|-|1p32.3|protein-coding	275.325	0.000890471	0.169805	0.00524408	0.995816	0.999987	127428	TCEANC2
RBM15B|HUMAGCGB|OTT3|-|3p21.2|protein-coding	1484.71	-0.0525022	0.133291	-0.393893	0.69366	0.999987	29890	RBM15B
VDR|NR1I1|PPP1R163|-|12q13.11|protein-coding	139.156	-0.263376	0.256396	-1.02723	0.304314	0.999987	7421	VDR
OGDHL|-|-|10q11.23|protein-coding	0.976394	2.2218	2.66376	0.834084	0.404234	0.999987	55753	OGDHL
UTP3|CRL1|CRLZ1|SAS10|-|4q13.3|protein-coding	1903.08	0.173414	0.156115	1.11081	0.266648	0.999987	57050	UTP3
COBLL1|COBLR1|-|2q24.3|protein-coding	638.852	0.00651759	0.119159	0.0546967	0.95638	0.999987	22837	COBLL1
SRP14|ALURBP|-|15q15.1|protein-coding	2687.56	-0.0262937	0.130412	-0.20162	0.840214	0.999987	6727	SRP14
AKR7A3|AFAR2|-|1p36.13|protein-coding	5.22198	-0.128432	1.075	-0.119471	0.904902	0.999987	22977	AKR7A3
IRF6|LPS|OFC6|PIT|PPS|PPS1|VWS|VWS1|-|1q32.2|protein-coding	4.1619	0.381437	1.08058	0.352992	0.724094	0.999987	3664	IRF6
KRT19|CK19|K19|K1CS|-|17q21.2|protein-coding	229.731	-1.64024	1.44633	-1.13408	0.256763	0.999987	3880	KRT19
NIPAL3|DJ462O23.2|NPAL3|-|1p36.11|protein-coding	980.703	-0.466971	0.186899	-2.49853	0.0124711	0.999987	57185	NIPAL3
MFSD1|SMAP4|-|3q25.32|protein-coding	4163.3	-0.395531	0.225198	-1.75637	0.0790247	0.999987	64747	MFSD1
C4orf22|-|-|4q21.21|protein-coding	22.2433	0.0739146	0.481305	0.153571	0.877948	0.999987	255119	C4orf22
POLR3C|RPC3|RPC62|-|1q21.1|protein-coding	1150.78	-0.0931059	0.122002	-0.763151	0.445373	0.999987	10623	POLR3C
CYP2C8|CPC8|CYPIIC8|MP-12/MP-20|-|10q23.33|protein-coding	2.54193	0.223906	1.51069	0.148215	0.882173	0.999987	1558	CYP2C8
MIP|AQP0|CTRCT15|LIM1|MIP26|MP26|-|12q13.3|protein-coding	1.4966	-1.80557	1.90355	-0.948526	0.342862	0.999987	4284	MIP
STARD4|-|-|5q22.1|protein-coding	3439.56	0.112683	0.210098	0.536337	0.591726	0.999987	134429	STARD4
TEX2|HT008|TMEM96|-|17q23.3|protein-coding	1130.69	0.0563857	0.114938	0.490575	0.623727	0.999987	55852	TEX2
FZD8|FZ-8|hFZ8|-|10p11.21|protein-coding	104.399	0.409003	0.572813	0.714025	0.475212	0.999987	8325	FZD8
RRN3P1|-|-|16p12.2|pseudo	23.8884	0.374731	0.442956	0.845979	0.397564	0.999987	730092	RRN3P1
NRN1|NRN|dJ380B8.2|-|6p25.1|protein-coding	2147.44	-0.373648	0.199329	-1.87453	0.060858	0.999987	51299	NRN1
FBXO44|FBG3|FBX30|FBX6A|Fbx44|Fbxo6a|-|1p36.22|protein-coding	107.236	-0.29194	0.294643	-0.990825	0.321771	0.999987	93611	FBXO44
BEND3|KIAA1553|-|6q21|protein-coding	76.0727	0.343088	0.274818	1.24842	0.211877	0.999987	57673	BEND3
LINC01279|-|-|3q13.2|ncRNA	921.989	0.0987975	0.406139	0.24326	0.807804	0.999987	100506621	LINC01279
FGFRL1|FGFR5|FHFR|-|4p16.3|protein-coding	319.269	-0.255769	0.2374	-1.07738	0.281312	0.999987	53834	FGFRL1
MVD|FP17780|MDDase|MPD|POROK7|-|16q24.2|protein-coding	1518.66	-0.160666	0.238128	-0.674704	0.499864	0.999987	4597	MVD
NIM1K|NIM1|-|5p12|protein-coding	5.86471	0.627249	0.86773	0.722862	0.469765	0.999987	167359	NIM1K
FGF20|FGF-20|RHDA2|-|8p22|protein-coding	1.17974	0.419413	1.89956	0.220795	0.825252	0.999987	26281	FGF20
THRA|AR7|CHNG6|EAR7|ERB-T-1|ERBA|ERBA1|NR1A1|THRA1|THRA2|c-ERBA-1|-|17q21.1|protein-coding	316.441	-0.0806882	0.186404	-0.432866	0.665112	0.999987	7067	THRA
GNG4|-|-|1q42.3|protein-coding	3.34012	0.58923	1.16962	0.50378	0.614416	0.999987	2786	GNG4
ABHD5|CDS|CGI58|IECN2|NCIE2|-|3p21.33|protein-coding	1425.01	-0.112521	0.254303	-0.44247	0.658149	0.999987	51099	ABHD5
TBC1D3F|TBC1D3|-|17q12|protein-coding	4.32683	0.0127378	1.00305	0.0126991	0.989868	0.999987	84218	TBC1D3F
CDRT1|C170RF1|C17ORF1|C17ORF1A|FBXW10B|FBXW10P1|HREP|SM25H2|-|17p12|protein-coding	5.10376	-1.01809	0.938788	-1.08447	0.278157	0.999987	374286	CDRT1
GAR1|NOLA1|-|4q25|protein-coding	595.486	0.0651124	0.211643	0.307652	0.758347	0.999987	54433	GAR1
TMEM87A|-|-|15q15.1|protein-coding	1696.18	0.0281847	0.143009	0.197083	0.843762	0.999987	25963	TMEM87A
CIPC|KIAA1737|-|14q24.3|protein-coding	357.803	-0.237334	0.145866	-1.62707	0.103723	0.999987	85457	CIPC
ANO3|C11orf25|DYT23|DYT24|GENX-3947|TMEM16C|-|11p14.3-p14.2|protein-coding	136.084	-0.194061	0.535818	-0.362177	0.71722	0.999987	63982	ANO3
BMP4|BMP2B|BMP2B1|MCOPS6|OFC11|ZYME|-|14q22.2|protein-coding	15.4658	-0.331525	0.757345	-0.437746	0.66157	0.999987	652	BMP4
SENP8|DEN1|NEDP1|PRSC2|-|15q23|protein-coding	61.8607	0.179238	0.288067	0.622208	0.533805	0.999987	123228	SENP8
GOLPH3L|GPP34R|-|1q21.3|protein-coding	601.273	0.162408	0.113951	1.42525	0.154085	0.999987	55204	GOLPH3L
SLC47A1|MATE1|-|17p11.2|protein-coding	30.2473	-1.61397	1.00135	-1.6118	0.107006	0.999987	55244	SLC47A1
LINC00472|C6orf155|-|6q13|ncRNA	141.347	0.0641782	0.258007	0.248746	0.803558	0.999987	79940	LINC00472
PITPNC1|M-RDGB-beta|MRDGBbeta|RDGB-BETA|RDGBB|RDGBB1|-|17q24.2|protein-coding	354.489	0.124593	0.210255	0.592581	0.553462	0.999987	26207	PITPNC1
DRG2|-|-|17p11.2|protein-coding	778.952	-0.0941564	0.133861	-0.70339	0.481813	0.999987	1819	DRG2
RIF1|-|-|2q23.3|protein-coding	1416.81	0.0985051	0.16618	0.592763	0.55334	0.999987	55183	RIF1
SCMH1|Scml3|-|1p34.2|protein-coding	699.68	0.0036095	0.10755	0.0335613	0.973227	0.999987	22955	SCMH1
SLC5A8|AIT|SMCT|SMCT1|-|12q23.1-q23.2|protein-coding	1.28108	-0.681231	2.16513	-0.314637	0.753037	0.999987	160728	SLC5A8
MARC1|MOSC1|-|1q41|protein-coding	12.3951	-0.217943	0.811147	-0.268685	0.788172	0.999987	64757	2019-03-01
LINC01684|-|-|21q21.2|ncRNA	1.2114	0.456045	2.6602	0.171433	0.863884	0.999987	105372751	LINC01684
UNC13A|Munc13-1|-|19p13.11|protein-coding	26.2588	-1.08905	0.669537	-1.62657	0.103829	0.999987	23025	UNC13A
BRSK2|C11orf7|PEN11B|SAD1|SADA|STK29|-|11p15.5|protein-coding	1.85383	1.50878	1.96087	0.769443	0.44163	0.999987	9024	BRSK2
LOC100507487|-|-|4q28.2|ncRNA	6.33675	-0.124865	0.856466	-0.145791	0.884086	0.999987	100507487	LOC100507487
MGA|MAD5|MXD5|-|15q15.1|protein-coding	911.753	-0.00033877	0.124482	-0.00272144	0.997829	0.999987	23269	MGA
NFKB2|CVID10|H2TF1|LYT-10|LYT10|NF-kB2|p100|p49/p100|p52|-|10q24.32|protein-coding	625.175	-0.0736092	0.158941	-0.463122	0.643277	0.999987	4791	NFKB2
POLL|BETAN|POLKAPPA|-|10q24.32|protein-coding	302.269	0.188638	0.159276	1.18435	0.236275	0.999987	27343	POLL
C3orf52|TTMP|-|3q13.2|protein-coding	34.1667	0.359655	0.444933	0.808336	0.418897	0.999987	79669	C3orf52
NRK|NESK|-|Xq22.3|protein-coding	88.2928	0.387054	0.873526	0.443094	0.657698	0.999987	203447	NRK
GTF2I|BAP135|BTKAP1|DIWS|GTFII-I|IB291|SPIN|TFII-I|WBS|WBSCR6|-|7q11.23|protein-coding	781.958	-0.0357385	0.10867	-0.328871	0.742253	0.999987	2969	GTF2I
C5orf58|-|-|5q35.1|protein-coding	0.33418	1.88175	4.03853	0.46595	0.641251	0.999987	133874	C5orf58
CYP46A1|CP46|CYP46|-|14q32.2|protein-coding	2.53276	1.47284	1.45543	1.01196	0.311556	0.999987	10858	CYP46A1
MYOZ1|CS-2|FATZ|MYOZ|-|10q22.2|protein-coding	0.679952	2.90297	2.84697	1.01967	0.307886	0.999987	58529	MYOZ1
PAPSS1|ATPSK1|PAPSS|SK1|-|4q25|protein-coding	1454.02	-0.0454621	0.125965	-0.360911	0.718166	0.999987	9061	PAPSS1
LOC283887|-|-|16p12.1|ncRNA	2.35052	-0.408263	1.41093	-0.289357	0.772308	0.999987	283887	LOC283887
ELAVL3|HUC|HUCL|PLE21|-|19p13.2|protein-coding	0.338427	0.0322791	4.08047	0.00791063	0.993688	0.999987	1995	ELAVL3
LOC101928414|-|-|15q21.1|ncRNA	3.27357	-1.19852	1.26913	-0.944359	0.344986	0.999987	101928414	LOC101928414
CSNK2A1|CK2A1|CKII|CSNK2A3|OCNDS|-|20p13|protein-coding	1351.7	0.0767171	0.1172	0.65458	0.512738	0.999987	1457	CSNK2A1
MRPL15|HSPC145|L15mt|MRP-L15|MRP-L7|RPML7|-|8q11.23|protein-coding	1604.19	0.135275	0.139791	0.967696	0.333196	0.999987	29088	MRPL15
PGM3|AGM1|IMD23|PAGM|PGM 3|-|6q14.1|protein-coding	2203.23	0.0781363	0.0907479	0.861026	0.389224	0.999987	5238	PGM3
FAM156A|PRO0659|TMEM29|-|Xp11.22|protein-coding	0.66057	1.48379	2.97804	0.498244	0.618312	0.999987	29057	FAM156A
ELP6|C3orf75|TMEM103|-|3p21.31|protein-coding	568.12	-0.0849595	0.134345	-0.6324	0.527126	0.999987	54859	ELP6
GCDH|ACAD5|GCD|-|19p13.13|protein-coding	385.177	-0.0237589	0.201205	-0.118083	0.906002	0.999987	2639	GCDH
PLS3-AS1|-|-|Xq23|ncRNA	4.82935	0.318232	1.1194	0.284288	0.77619	0.999987	101927352	PLS3-AS1
PHLDA2|BRW1C|BWR1C|HLDA2|IPL|TSSC3|-|11p15.4|protein-coding	543.672	-0.27937	0.248571	-1.12391	0.261053	0.999987	7262	PHLDA2
MIR3681HG|-|-|2p24.3|ncRNA	0.510914	-2.45615	3.96983	-0.618705	0.536111	0.999987	100506457	MIR3681HG
LDLRAP1|ARH|ARH1|ARH2|FHCB1|FHCB2|-|1p36.11|protein-coding	435.721	-0.367058	0.19439	-1.88825	0.0589917	0.999987	26119	LDLRAP1
TWISTNB|-|-|7p21.1|protein-coding	830.538	0.12909	0.156589	0.824389	0.409718	0.999987	221830	TWISTNB
SDHAF3|ACN9|DC11|LYRM10|Sdh7|-|7q21.3|protein-coding	155.895	0.226532	0.305588	0.741298	0.458513	0.999987	57001	SDHAF3
PLEKHG6|MyoGEF|-|12p13.31|protein-coding	0.851289	1.93992	2.35236	0.824672	0.409558	0.999987	55200	PLEKHG6
ADORA2A|A2aR|ADORA2|RDC8|-|22q11.23|protein-coding	14.3621	-0.0538053	0.569811	-0.0944265	0.92477	0.999987	135	ADORA2A
LOC646471|-|-|1p36.11|ncRNA	0.662172	-2.83331	2.86695	-0.988265	0.323023	0.999987	646471	LOC646471
CLK2P1|CLK2P|-|7p15.3|pseudo	1.31012	0.780631	1.84723	0.422594	0.672591	0.999987	1197	CLK2P1
AURKB|AIK2|AIM-1|AIM1|ARK2|AurB|IPL1|PPP1R48|STK12|STK5|aurkb-sv1|aurkb-sv2|-|17p13.1|protein-coding	517.414	0.193231	0.254635	0.758858	0.447938	0.999987	9212	AURKB
CYB561D1|-|-|1p13.3|protein-coding	337.877	-0.184305	0.167572	-1.09986	0.271394	0.999987	284613	CYB561D1
KCNN1|KCa2.1|SK1|SKCA1|hSK1|-|19p13.11|protein-coding	2.61919	-1.08438	1.28233	-0.845633	0.397758	0.999987	3780	KCNN1
ZSWIM5|-|-|1p34.1|protein-coding	3.68359	1.42901	1.11161	1.28553	0.198607	0.999987	57643	ZSWIM5
ZNF385B|ZNF533|-|2q31.2-q31.3|protein-coding	0.827437	0.542003	2.89242	0.187388	0.851357	0.999987	151126	ZNF385B
AXIN1|AXIN|PPP1R49|-|16p13.3|protein-coding	405.245	0.0243845	0.155691	0.156622	0.875543	0.999987	8312	AXIN1
DCUN1D3|44M2.4|SCCRO3|-|16p12.3|protein-coding	348.348	-0.0887872	0.203543	-0.436208	0.662686	0.999987	123879	DCUN1D3
UBAP2|UBAP-2|-|9p13.3|protein-coding	1125.22	0.0560157	0.121041	0.462785	0.643519	0.999987	55833	UBAP2
MPP3|DLG3|-|17q21.31|protein-coding	140.473	0.0746464	0.210631	0.354395	0.723043	0.999987	4356	MPP3
TAF11|MGC:15243|PRO2134|TAF2I|TAFII28|-|6p21.31|protein-coding	857.182	-0.139758	0.140809	-0.992534	0.320937	0.999987	6882	TAF11
LOC105747689|-|-|2q32.3|ncRNA	111.439	-0.00271621	0.307601	-0.00883028	0.992955	0.999987	105747689	LOC105747689
PIP5K1B|MSS4|STM7|-|9q21.11|protein-coding	1.82952	0.81967	1.47941	0.554051	0.579544	0.999987	8395	PIP5K1B
IFIH1|AGS7|Hlcd|IDDM19|MDA-5|MDA5|RLR-2|SGMRT1|-|2q24.2|protein-coding	92.9934	0.0907803	0.330137	0.274978	0.783333	0.999987	64135	IFIH1
SCARB1|CD36L1|CLA-1|CLA1|HDLQTL6|SR-BI|SRB1|-|12q24.31|protein-coding	890.425	-0.500263	0.275707	-1.81447	0.0696048	0.999987	949	SCARB1
CERS4|LASS4|Trh1|-|19p13.2|protein-coding	5.26052	-0.875323	0.933092	-0.938088	0.348199	0.999987	79603	CERS4
VAPB|ALS8|VAMP-B|VAP-B|-|20q13.32|protein-coding	1355.99	0.131582	0.159173	0.82666	0.40843	0.999987	9217	VAPB
RASSF1|123F2|NORE2A|RASSF1A|RDA32|REH3P21|-|3p21.31|protein-coding	673.554	-0.0640211	0.157874	-0.405519	0.685096	0.999987	11186	RASSF1
TATDN1|CDA11|-|8q24.13|protein-coding	311.612	0.294351	0.194244	1.51537	0.129679	0.999987	83940	TATDN1
FAM111B|CANP|POIKTMP|-|11q12.1|protein-coding	575.369	0.255056	0.300822	0.847864	0.396514	0.999987	374393	FAM111B
LOC90784|-|-|2p11.2|ncRNA	196.733	-0.0228521	0.231743	-0.0986095	0.921448	0.999987	90784	LOC90784
FAT4|CDHF14|CDHR11|FAT-J|FATJ|HKLLS2|NBLA00548|VMLDS2|-|4q28.1|protein-coding	1449.66	-0.115923	0.244145	-0.474811	0.634922	0.999987	79633	FAT4
SNORA16B|U98b|-|1q32.3|snoRNA	0.490835	-2.40338	3.99506	-0.601589	0.547448	0.999987	692157	SNORA16B
THAP9|hTh9|-|4q21.22|protein-coding	42.8897	0.122132	0.408875	0.298703	0.765167	0.999987	79725	THAP9
ZDHHC8|DHHC8|ZDHHCL1|ZNF378|-|22q11.21|protein-coding	827.338	0.134115	0.141524	0.947647	0.343309	0.999987	29801	ZDHHC8
GDF9|-|-|5q31.1|protein-coding	4.34667	0.263445	0.973614	0.270585	0.786711	0.999987	2661	GDF9
ANKRD52|ANKRD33|-|12q13.3|protein-coding	2753.84	-0.0309126	0.171246	-0.180515	0.856748	0.999987	283373	ANKRD52
B4GALT1-AS1|-|-|9p21.1|ncRNA	17.728	0.411851	0.566281	0.727292	0.467047	0.999987	101929639	B4GALT1-AS1
RHOH|ARHH|TTF|-|4p14|protein-coding	1.16208	1.30697	2.64907	0.49337	0.621751	0.999987	399	RHOH
THBD|AHUS6|BDCA3|CD141|THPH12|THRM|TM|-|20p11.21|protein-coding	1208.9	-0.000727423	0.20149	-0.00361023	0.997119	0.999987	7056	THBD
ZCCHC2|C18orf49|-|18q21.33|protein-coding	307.525	0.0183214	0.221748	0.0826227	0.934152	0.999987	54877	ZCCHC2
HDGFRP3|CGI-142|HDGF-2|HDGF2|HRP-3|-|15q25.2|protein-coding	1025.63	0.209327	0.159146	1.31532	0.188402	0.999987	50810	HDGFRP3
TLL2|-|-|10q24.1|protein-coding	2.82609	-0.110741	1.2749	-0.0868626	0.930781	0.999987	7093	TLL2
EPB41L5|BE37|YMO1|YRT|-|2q14.2|protein-coding	584.601	0.133125	0.200205	0.66494	0.506089	0.999987	57669	EPB41L5
MIR671|MIRN671|hsa-mir-671|mir-671|-|7q36.1|ncRNA	67.1145	-0.116703	0.303103	-0.385028	0.700217	0.999987	768213	MIR671
SLC25A37|HT015|MFRN|MFRN1|MSC|MSCP|PRO1278|PRO1584|PRO2217|-|8p21.2|protein-coding	1064.9	0.178622	0.126048	1.41709	0.156457	0.999987	51312	SLC25A37
RPL8|L8|-|8q24.3|protein-coding	14059.3	0.0137399	0.0913858	0.150351	0.880488	0.999987	6132	RPL8
LOC401261|-|-|6p21.1|ncRNA	6.65317	0.449843	0.884337	0.508678	0.610978	0.999987	401261	LOC401261
SMIM5|C17orf109|PP12104|-|17q25.1|protein-coding	0.485215	-0.840996	3.25442	-0.258416	0.796086	0.999987	643008	SMIM5
CX3CR1|CCRL1|CMKBRL1|CMKDR1|GPR13|GPRV28|V28|-|3p22.2|protein-coding	0.80264	-3.11667	2.71887	-1.14631	0.251667	0.999987	1524	CX3CR1
PTK7|CCK-4|CCK4|-|6p21.1|protein-coding	1226.71	-0.242155	0.27762	-0.872254	0.38307	0.999987	5754	PTK7
TP53RK|BUD32|C20orf64|Nori-2|Nori-2p|PRPK|dJ101A2|-|20q13.12|protein-coding	440.754	0.0997195	0.123858	0.80511	0.420756	0.999987	112858	TP53RK
CLK3|PHCLK3|PHCLK3/152|-|15q24.1|protein-coding	709.117	-0.12337	0.114713	-1.07547	0.282165	0.999987	1198	CLK3
MRPL51|CDA09|HSPC241|MRP64|bMRP64|-|12p13.31|protein-coding	2190.34	0.15438	0.127023	1.21537	0.224226	0.999987	51258	MRPL51
NUMB|C14orf41|S171|c14_5527|-|14q24.2-q24.3|protein-coding	2855.56	0.0306649	0.157451	0.194759	0.845582	0.999987	8650	NUMB
NRXN1|Hs.22998|PTHSL2|SCZD17|-|2p16.3|protein-coding	1.01632	-2.21576	3.4067	-0.650413	0.515426	0.999987	9378	NRXN1
KCNT2|KCa4.2|SLICK|SLO2.1|-|1q31.3|protein-coding	3.3409	-1.1746	1.34374	-0.874127	0.382049	0.999987	343450	KCNT2
CCT5|CCT-epsilon|CCTE|HEL-S-69|PNAS-102|TCP-1-epsilon|-|5p15.2|protein-coding	9484.78	0.112443	0.12676	0.887052	0.375051	0.999987	22948	CCT5
FOXA2|HNF3B|TCF3B|-|20p11.21|protein-coding	2.79138	2.87315	2.09632	1.37057	0.17051	0.999987	3170	FOXA2
SPACA6P-AS|LINC01129|-|19q13.41|ncRNA	0.485215	-0.840996	3.25442	-0.258416	0.796086	0.999987	102238594	SPACA6P-AS
RPL13A|L13A|TSTA1|-|19q13.33|protein-coding	8450.49	0.0222707	0.113987	0.195379	0.845097	0.999987	23521	RPL13A
LINC00339|HSPC157|NCRNA00339|-|1p36.12|ncRNA	116.093	-0.111095	0.275695	-0.402963	0.686975	0.999987	29092	LINC00339
LANCL3|-|-|Xp21.1|protein-coding	0.49348	0.886025	4.04161	0.219226	0.826474	0.999987	347404	LANCL3
LACTB2-AS1|-|-|8q13.3|ncRNA	0.32971	1.86485	4.04005	0.46159	0.644375	0.999987	286190	LACTB2-AS1
VASP|-|-|19q13.32|protein-coding	4139.74	-0.0882861	0.0873657	-1.01054	0.312239	0.999987	7408	VASP
POLR3A|ADDH|HLD7|RPC1|RPC155|hRPC155|-|10q22.3|protein-coding	1272.45	0.0184078	0.14616	0.125942	0.899778	0.999987	11128	POLR3A
KCTD2|-|-|17q25.1|protein-coding	661.386	0.0427251	0.167372	0.25527	0.798514	0.999987	23510	KCTD2
SNORD117|U83|-|6p21.33|snoRNA	1.32182	-2.67865	2.03454	-1.31658	0.187978	0.999987	692233	SNORD117
C1orf53|-|-|1q31.3|protein-coding	12.4718	-0.00874221	0.648554	-0.0134795	0.989245	0.999987	388722	C1orf53
MFSD4A|MFSD4|UNQ3064|-|1q32.1|protein-coding	3.80766	-0.341419	1.09233	-0.312562	0.754614	0.999987	148808	MFSD4A
DENND2C|dJ1156J9.1|-|1p13.2|protein-coding	39.295	-0.112318	0.379253	-0.296155	0.767112	0.999987	163259	DENND2C
TRIM25|EFP|RNF147|Z147|ZNF147|-|17q22|protein-coding	2076.25	-0.00874727	0.1651	-0.0529816	0.957747	0.999987	7706	TRIM25
ZSCAN26|SRE-ZBP|SREZBP|ZNF187|-|6p22.1|protein-coding	294.016	-0.0490978	0.20621	-0.238096	0.811807	0.999987	7741	ZSCAN26
TOMM40|C19orf1|D19S1177E|PER-EC1|PEREC1|TOM40|-|19q13.32|protein-coding	974.575	0.215085	0.166913	1.28861	0.197534	0.999987	10452	TOMM40
C14orf2|MP68|PLPM|-|14q32.33|protein-coding	1372.07	-0.00454497	0.097431	-0.0466481	0.962794	0.999987	9556	C14orf2
ERCC6L2|BMFS2|C9orf102|RAD26L|SR278|-|9q22.32|protein-coding	454.613	0.134621	0.166725	0.807444	0.419411	0.999987	375748	ERCC6L2
FRYL|AF4p12|KIAA0826|MOR2|-|4p11|protein-coding	2028.7	-0.00214743	0.093264	-0.0230253	0.98163	0.999987	285527	FRYL
LOC100130417|-|-|1p36.33|ncRNA	0.338427	0.0322791	4.08047	0.00791063	0.993688	0.999987	100130417	LOC100130417
EXOSC6|EAP4|MTR3|Mtr3p|hMtr3p|p11|-|16q22.1|protein-coding	238.901	-0.0115507	0.199432	-0.0579178	0.953814	0.999987	118460	EXOSC6
ECD|GCR2|HSGT1|SGT1|-|10q22.2|protein-coding	1321.87	-0.0641124	0.100439	-0.638323	0.523263	0.999987	11319	ECD
RCHY1|ARNIP|CHIMP|PIRH2|PRO1996|RNF199|ZCHY|ZNF363|-|4q21.1|protein-coding	300.823	0.151164	0.147101	1.02762	0.304129	0.999987	25898	RCHY1
LINC00535|-|-|8q22.1|ncRNA	1.29359	-0.658957	1.91294	-0.344473	0.73049	0.999987	642924	LINC00535
NFATC2|NFAT1|NFATP|-|20q13.2|protein-coding	43.558	-0.270882	0.687878	-0.393794	0.693733	0.999987	4773	NFATC2
ZNF862|-|-|7q36.1|protein-coding	179.41	-0.0655803	0.331766	-0.19767	0.843303	0.999987	643641	ZNF862
NOXRED1|C14orf148|-|14q24.3|protein-coding	3.65972	0.0344961	1.0195	0.0338363	0.973008	0.999987	122945	NOXRED1
LOC100133669|-|-|8q24.3|ncRNA	1.19728	3.71844	2.41297	1.54102	0.123312	0.999987	100133669	LOC100133669
CDCP1|CD318|SIMA135|TRASK|-|3p21.31|protein-coding	217.844	0.932424	0.54327	1.71632	0.0861039	0.999987	64866	CDCP1
MIR3654|-|-|7q33|ncRNA	2.61873	-0.291421	1.30137	-0.223934	0.822808	0.999987	100500804	MIR3654
LOC644285|-|-|5q14.3|ncRNA	8.67255	0.285106	0.825723	0.34528	0.729884	0.999987	644285	LOC644285
OGFOD2|-|-|12q24.31|protein-coding	187.004	0.0060092	0.17375	0.0345853	0.97241	0.999987	79676	OGFOD2
GDE1|363E6.2|MIR16|-|16p12.3|protein-coding	1239.61	-0.132269	0.120666	-1.09615	0.273011	0.999987	51573	GDE1
SIAH1|SIAH1A|-|16q12.1|protein-coding	238.059	0.105987	0.194042	0.546204	0.584926	0.999987	6477	SIAH1
KCTD10|BTBD28|MSTP028|ULRO61|hBACURD3|-|12q24.11|protein-coding	3306.58	-0.0285943	0.110737	-0.258218	0.796238	0.999987	83892	KCTD10
EGR2|AT591|CMT1D|CMT4E|KROX20|-|10q21.3|protein-coding	2.33916	0.0446614	1.56121	0.0286068	0.977178	0.999987	1959	EGR2
BCL6B|BAZF|ZBTB28|ZNF62|-|17p13.1|protein-coding	100.535	-0.462044	0.612789	-0.754002	0.450848	0.999987	255877	BCL6B
SAFB2|-|-|19p13.3|protein-coding	668.364	0.00228675	0.135297	0.0169017	0.986515	0.999987	9667	SAFB2
NR1H4|BAR|FXR|HRR-1|HRR1|PFIC5|RIP14|-|12q23.1|protein-coding	0.476949	-2.36579	3.99736	-0.591838	0.553959	0.999987	9971	NR1H4
SLF1|ANKRD32|BRCTD1|BRCTx|-|5q15|protein-coding	268.691	0.329899	0.182632	1.80636	0.070862	0.999987	84250	SLF1
DPY19L2|SPATA34|SPGF9|-|12q14.2|protein-coding	6.88128	-0.945039	1.06678	-0.885877	0.375684	0.999987	283417	DPY19L2
SRFBP1|BUD22|P49|Rlb1|STRAP|p49/STRAP|-|5q23.1|protein-coding	441.581	0.116641	0.155541	0.749901	0.453314	0.999987	153443	SRFBP1
AFTPH|Nbla10388|-|2p14|protein-coding	561.265	0.0139405	0.122273	0.114012	0.909228	0.999987	54812	AFTPH
WAC-AS1|-|-|10p12.1|ncRNA	343.606	0.00935635	0.334105	0.0280043	0.977659	0.999987	220906	WAC-AS1
ZBTB45|ZNF499|-|19q13.43|protein-coding	146.089	0.119213	0.183266	0.650495	0.515372	0.999987	84878	ZBTB45
ALKBH3|ABH3|DEPC-1|DEPC1|PCA1|hABH3|-|11p11.2|protein-coding	450.417	0.226552	0.150996	1.50039	0.133515	0.999987	221120	ALKBH3
ASB9|-|-|Xp22.2|protein-coding	14.3195	1.15407	0.583971	1.97624	0.0481279	0.999987	140462	ASB9
ADRA2B|ADRA2L1|ADRA2RL1|ADRARL1|ALPHA2BAR|FAME2|alpha-2BAR|-|2q11.2|protein-coding	1.93224	0.062143	1.94929	0.0318798	0.974568	0.999987	151	ADRA2B
SLC9A3R1|EBP50|NHERF|NHERF-1|NHERF1|NPHLOP2|-|17q25.1|protein-coding	693.852	-0.107014	0.205094	-0.521783	0.601822	0.999987	9368	SLC9A3R1
AK5|AK6|-|1p31.1|protein-coding	2079.62	-0.382737	0.375602	-1.019	0.308205	0.999987	26289	AK5
LOC283440|-|-|12p13.33|ncRNA	0.838777	1.94916	2.77486	0.702436	0.482408	0.999987	283440	LOC283440
RPH3A|-|-|12q24.13|protein-coding	1.01517	-0.97737	2.79476	-0.349715	0.726552	0.999987	22895	RPH3A
BMPR1B|ALK-6|ALK6|AMDD|BDA1D|BDA2|CDw293|-|4q22.3|protein-coding	9.61144	1.3273	1.3203	1.0053	0.314753	0.999987	658	BMPR1B
PNKP|AOA4|EIEE10|MCSZ|PNK|-|19q13.33|protein-coding	333.424	0.322366	0.247412	1.30295	0.192591	0.999987	11284	PNKP
FBXO34|CGI-301|Fbx34|-|14q22.3|protein-coding	430.969	0.00441549	0.145905	0.0302627	0.975858	0.999987	55030	FBXO34
GS1-259H13.2|-|-|7q22.1|protein-coding	4.66284	0.240039	1.02544	0.234083	0.814921	0.999987	100289187	GS1-259H13.2
PA2G4P4|PA2G4L1|-|3q25.31|pseudo	5.83971	0.619871	0.828843	0.747875	0.454535	0.999987	647033	PA2G4P4
PPP2R2B|B55BETA|PP2AB55BETA|PP2ABBETA|PP2APR55B|PP2APR55BETA|PR2AB55BETA|PR2ABBETA|PR2APR55BETA|PR52B|PR55-BETA|PR55BETA|SCA12|-|5q32|protein-coding	0.338427	0.0322791	4.08047	0.00791063	0.993688	0.999987	5521	PPP2R2B
SLCO1A2|OATP|OATP-A|OATP1A2|SLC21A3|-|12p12.1|protein-coding	1.51921	-2.89894	2.46697	-1.1751	0.239954	0.999987	6579	SLCO1A2
CTLA4|ALPS5|CD|CD152|CELIAC3|CTLA-4|GRD4|GSE|IDDM12|-|2q33.2|protein-coding	0.81801	0.696622	2.84307	0.245025	0.806437	0.999987	1493	CTLA4
GNL3|C77032|E2IG3|NNP47|NS|-|3p21.1|protein-coding	2519.17	0.0709082	0.160577	0.441583	0.658791	0.999987	26354	GNL3
KCNN4|DHS2|IK|IK1|IKCA1|KCA4|KCa3.1|SK4|hIKCa1|hKCa4|hSK4|-|19q13.31|protein-coding	2.68837	0.42076	1.3456	0.312694	0.754513	0.999987	3783	KCNN4
SUN1|UNC84A|-|7p22.3|protein-coding	2399.04	0.0198209	0.119233	0.166236	0.867971	0.999987	23353	SUN1
HOXA9|ABD-B|HOX1|HOX1.7|HOX1G|-|7p15.2|protein-coding	357.131	0.157489	0.187053	0.841949	0.399816	0.999987	3205	HOXA9
BRD9|LAVS3040|PRO9856|-|5p15.33|protein-coding	1087.84	-0.108737	0.11102	-0.979432	0.327366	0.999987	65980	BRD9
PLSCR4|TRA1|-|3q24|protein-coding	677.204	-0.0830755	0.230486	-0.360436	0.718521	0.999987	57088	PLSCR4
VASH2|-|-|1q32.3|protein-coding	2.17529	1.19162	1.3767	0.865566	0.386728	0.999987	79805	VASH2
HPS1|BLOC3S1|HPS|-|10q24.2|protein-coding	1181.06	-0.123359	0.168431	-0.732401	0.463924	0.999987	3257	HPS1
ZNF548|-|-|19q13.43|protein-coding	133.424	-0.183432	0.243708	-0.752672	0.451647	0.999987	147694	ZNF548
C4orf33|-|-|4q28.2|protein-coding	186.113	0.156173	0.194695	0.802139	0.422472	0.999987	132321	C4orf33
HERC2P9|-|-|15q13.1|pseudo	33.9024	-0.144796	0.682992	-0.212003	0.832105	0.999987	440248	HERC2P9
SNORA3B|ACA3-2|SNORA45|SNORA45B|-|11p15.4|snoRNA	11.2468	0.730195	0.726921	1.0045	0.315136	0.999987	677826	SNORA3B
COMMD9|HSPC166|-|11p13|protein-coding	779.352	-0.152046	0.139151	-1.09267	0.274538	0.999987	29099	COMMD9
PARD6A|PAR-6A|PAR6|PAR6C|PAR6alpha|TAX40|TIP-40|-|16q22.1|protein-coding	5.25376	0.232539	0.942662	0.246683	0.805154	0.999987	50855	PARD6A
CYP3A7|CP37|CYPIIIA7|P-450(HFL33)|P-450111A7|P450-HFLA|-|7q22.1|protein-coding	0.33418	1.88175	4.03853	0.46595	0.641251	0.999987	1551	CYP3A7
NPC2|EDDM1|HE1|-|14q24.3|protein-coding	2115.79	-0.223699	0.219571	-1.0188	0.308297	0.999987	10577	NPC2
VSTM1|SIRL-1|SIRL1|UNQ3033|-|19q13.42|protein-coding	0.338427	0.0322791	4.08047	0.00791063	0.993688	0.999987	284415	VSTM1
STIM1|D11S4896E|GOK|IMD10|STRMK|TAM|TAM1|-|11p15.4|protein-coding	867.807	-0.138561	0.190513	-0.727304	0.467039	0.999987	6786	STIM1
ERICH1|HSPC319|-|8p23.3|protein-coding	285.562	-0.019485	0.141868	-0.137346	0.890757	0.999987	157697	ERICH1
ST8SIA2|HsT19690|SIAT8-B|SIAT8B|ST8SIA-II|ST8SiaII|STX|-|15q26.1|protein-coding	16.5033	-1.03109	0.97799	-1.0543	0.291747	0.999987	8128	ST8SIA2
KLHL41|KBTBD10|Krp1|SARCOSIN|-|2q31.1|protein-coding	4.6844	0.0457084	1.04729	0.0436443	0.965188	0.999987	10324	KLHL41
PRKCQ|PRKCT|nPKC-theta|-|10p15.1|protein-coding	2.36545	-0.0110843	1.52029	-0.00729089	0.994183	0.999987	5588	PRKCQ
MOB4|2C4D|CGI-95|MOB1|MOB3|MOBKL3|PHOCN|PREI3|-|2q33.1|protein-coding	1055.68	0.106656	0.147425	0.723457	0.469399	0.999987	25843	MOB4
LINC01569|-|-|16p13.3|ncRNA	9.35747	-0.08284	0.68866	-0.120291	0.904252	0.999987	100507501	LINC01569
CHD1|-|-|5q15-q21.1|protein-coding	1025.88	0.255372	0.141155	1.80916	0.0704263	0.999987	1105	CHD1
IGSF23|-|-|19q13.31|protein-coding	5.68891	-0.128702	0.989489	-0.130069	0.896512	0.999987	147710	IGSF23
LOC100505635|-|-|6p21.2|ncRNA	0.335331	0.0322791	4.08047	0.00791063	0.993688	0.999987	100505635	LOC100505635
SDHAP2|SDHAL2|SDHALP2|-|3q29|pseudo	56.322	-0.648624	0.698377	-0.92876	0.353014	0.999987	727956	SDHAP2
PCDHA2|PCDH-ALPHA2|-|5q31.3|protein-coding	1.83421	0.356153	1.91597	0.185886	0.852534	0.999987	56146	PCDHA2
HYMAI|NCRNA00020|-|6q24.2|ncRNA	6.15634	0.584424	0.840369	0.695436	0.486782	0.999987	57061	HYMAI
GRM1|GPRC1A|MGLU1|MGLUR1|PPP1R85|SCAR13|-|6q24.3|protein-coding	0.343362	0.0322791	4.08047	0.00791063	0.993688	0.999987	2911	GRM1
LOC105376382|-|-|10p15.1|ncRNA	10.1266	-0.197692	0.810726	-0.243846	0.80735	0.999987	105376382	LOC105376382
C22orf29|BOP|-|22q11.21|protein-coding	1512.15	0.0473697	0.210733	0.224785	0.822146	0.999987	79680	C22orf29
ZNF670-ZNF695|-|-|1q44|ncRNA	24.1435	0.333249	0.441255	0.755229	0.450111	0.999987	100533111	ZNF670-ZNF695
EVL|RNB6|-|14q32.2|protein-coding	250.37	0.0566801	0.166855	0.339697	0.734085	0.999987	51466	EVL
DAG1|156DAG|A3a|AGRNR|DAG|MDDGA9|MDDGC7|MDDGC9|-|3p21.31|protein-coding	3985	-0.149945	0.136743	-1.09655	0.272838	0.999987	1605	DAG1
PPP1CB|HEL-S-80p|PP-1B|PP1B|PP1beta|PPP1CD|-|2p23.2|protein-coding	2331.05	0.0941347	0.082477	1.14135	0.253726	0.999987	5500	PPP1CB
ZFP57|C6orf40|TNDM1|ZNF698|bA145L22|bA145L22.2|-|6p22.1|protein-coding	18.472	0.0882964	3.73502	0.0236402	0.98114	0.999987	346171	ZFP57
MAP2K6|MAPKK6|MEK6|MKK6|PRKMK6|SAPKK-3|SAPKK3|-|17q24.3|protein-coding	20.2038	0.406861	0.760241	0.535174	0.59253	0.999987	5608	MAP2K6
NOM1|C7orf3|PPP1R113|SGD1|-|7q36.3|protein-coding	825.461	0.169674	0.160152	1.05946	0.289391	0.999987	64434	NOM1
PRKD1|PKC-MU|PKCM|PKD|PRKCM|-|14q12|protein-coding	652.144	-0.0905677	0.250949	-0.360901	0.718173	0.999987	5587	PRKD1
IFT88|D13S1056E|DAF19|TG737|TTC10|hTg737|-|13q12.11|protein-coding	276.426	0.32936	0.170063	1.93669	0.0527832	0.999987	8100	IFT88
DOCK4|-|-|7q31.1|protein-coding	2108.58	0.00586847	0.162439	0.0361272	0.971181	0.999987	9732	DOCK4
EXOC3-AS1|C5orf55|-|5p15.33|ncRNA	33.3844	-0.0226883	0.390803	-0.0580557	0.953704	0.999987	116349	EXOC3-AS1
ADK|AK|-|10q22.2|10q11-q24|protein-coding	1259.56	0.00543366	0.193979	0.0280116	0.977653	0.999987	132	ADK
MTMR11|CRA|-|1q21.2|protein-coding	172.901	0.106399	0.279072	0.381261	0.70301	0.999987	10903	MTMR11
LINC00470|C18orf2|-|18p11.32|ncRNA	0.463063	-2.32739	3.99978	-0.581879	0.560648	0.999987	56651	LINC00470
FAM134C|-|-|17q21.2|protein-coding	636.703	-0.0627941	0.162489	-0.386451	0.699163	0.999987	162427	FAM134C
TMEM169|-|-|2q35|protein-coding	4.6415	0.0408997	0.914442	0.0447264	0.964325	0.999987	92691	TMEM169
MYO3B|-|-|2q31.1|protein-coding	0.333957	0.0322791	4.08047	0.00791063	0.993688	0.999987	140469	MYO3B
SUCO|C1orf9|CH1|OPT|SLP1|-|1q24.3|protein-coding	1324.52	0.118877	0.136452	0.871206	0.383642	0.999987	51430	SUCO
BTN2A3P|BTN2.3|BTN2A3|-|6p22.2|pseudo	86.3695	-0.200899	0.264986	-0.758147	0.448363	0.999987	54718	BTN2A3P
CFP|BFD|PFC|PFD|PROPERDIN|-|Xp11.23|protein-coding	7.512	-0.432381	0.809331	-0.534245	0.593172	0.999987	5199	CFP
ZC3HAV1L|C7orf39|-|7q34|protein-coding	85.0191	-0.122357	0.301662	-0.405611	0.685028	0.999987	92092	ZC3HAV1L
HLA-L|HLA-92|HLA92|HLAL|-|6p22.1|pseudo	187.411	0.00977362	0.609176	0.016044	0.987199	0.999987	3139	HLA-L
RUNX3|AML2|CBFA3|PEBP2aC|-|1p36.11|protein-coding	531.127	-0.218068	0.328863	-0.663097	0.507268	0.999987	864	RUNX3
HLX|HB24|HLX1|-|1q41|protein-coding	88.3189	0.498373	0.256294	1.94454	0.0518305	0.999987	3142	HLX
LOC101927620|-|-|14q22.1|ncRNA	1.61573	0.0667479	1.77804	0.0375401	0.970054	0.999987	101927620	LOC101927620
TEX261|TEG-261|-|2p13.3|protein-coding	2758.88	-0.0547342	0.0980615	-0.558163	0.576733	0.999987	113419	TEX261
MRPL46|C15orf4|LIECG2|P2ECSL|-|15q25.3|protein-coding	374.228	0.0638838	0.161115	0.39651	0.691729	0.999987	26589	MRPL46
APOL4|APOL-IV|APOLIV|-|22q12.3|protein-coding	0.806659	-0.535083	2.41025	-0.222003	0.824312	0.999987	80832	APOL4
EDEM2|C20orf31|C20orf49|bA4204.1|-|20q11.22|protein-coding	655.433	-0.0118385	0.195833	-0.0604517	0.951796	0.999987	55741	EDEM2
SBF1|CMT4B3|DENND7A|MTMR5|-|22q13.33|protein-coding	1415.36	-0.0377803	0.164447	-0.229742	0.818292	0.999987	6305	SBF1
LOC105376114|-|-|9q21.32|ncRNA	33.4735	-0.225267	0.447442	-0.503456	0.614644	0.999987	105376114	LOC105376114
ATXN1|ATX1|D6S504E|SCA1|-|6p22.3|protein-coding	356.761	-0.0343146	0.257777	-0.133117	0.8941	0.999987	6310	ATXN1
FAAHP1|-|-|1p33|pseudo	0.674908	-1.48323	2.97432	-0.498681	0.618004	0.999987	729041	FAAHP1
MSH5|G7|MUTSH5|NG23|-|6p21.33|protein-coding	219.519	0.216153	0.200258	1.07937	0.280422	0.999987	4439	MSH5
LIG1|-|-|19q13.33|protein-coding	565.442	0.215468	0.214227	1.00579	0.314516	0.999987	3978	LIG1
SSMEM1|C7orf45|-|7q32.2|protein-coding	0.826052	0.618139	2.40388	0.257142	0.797069	0.999987	136263	SSMEM1
BEX2|BEX1|DJ79P11.1|-|Xq22.2|protein-coding	4.16995	0.847414	1.00493	0.843257	0.399085	0.999987	84707	BEX2
PLSCR3|-|-|17p13.1|protein-coding	1790.37	-0.134824	0.16044	-0.840337	0.400719	0.999987	57048	PLSCR3
EEF1D|EF-1D|EF1D|FP1047|-|8q24.3|protein-coding	4315	0.109962	0.128962	0.852671	0.393842	0.999987	1936	EEF1D
SCN2A|BFIC3|BFIS3|BFNIS|EIEE11|HBA|HBSCI|HBSCII|NAC2|Na(v)1.2|Nav1.2|SCN2A1|SCN2A2|-|2q24.3|protein-coding	2.20018	0.683059	1.88895	0.361607	0.717646	0.999987	6326	SCN2A
TXNDC11|EFP1|-|16p13.13|protein-coding	1035.5	0.00542636	0.109745	0.0494451	0.960565	0.999987	51061	TXNDC11
ADAMTSL4-AS1|C1orf138|-|1q21.2|ncRNA	4.52602	0.165116	1.08717	0.151877	0.879284	0.999987	574406	ADAMTSL4-AS1
ZNF195|HRF1|ZNFP104|-|11p15.4|protein-coding	431.452	0.139324	0.140235	0.993504	0.320464	0.999987	7748	ZNF195
LINC00222|C6orf181|NCRNA00222|dJ354J5.2|-|6q21|ncRNA	0.661022	-1.44936	2.51884	-0.575407	0.565016	0.999987	387111	LINC00222
IFITM1|9-27|CD225|DSPA2a|IFI17|LEU13|-|11p15.5|protein-coding	604.658	0.127256	0.413604	0.307676	0.758329	0.999987	8519	IFITM1
PDE8B|ADSD|PPNAD3|-|5q13.3|protein-coding	3.8057	-0.0798873	1.1566	-0.0690706	0.944933	0.999987	8622	PDE8B
SPNS2|-|-|17p13.2|protein-coding	4.17018	-3.49838	1.40879	-2.48324	0.0130192	0.999987	124976	SPNS2
SHISA4|C1orf40|TMEM58|-|1q32.1|protein-coding	347.93	-0.357581	0.282753	-1.26464	0.206	0.999987	149345	SHISA4
HSD11B2|AME|AME1|HSD11K|HSD2|SDR9C3|-|16q22.1|protein-coding	2.13731	0.286829	1.42421	0.201396	0.840389	0.999987	3291	HSD11B2
TFAP2E|AP2E|-|1p34.3|protein-coding	5.72625	-0.0415359	0.929124	-0.0447044	0.964343	0.999987	339488	TFAP2E
METTL7A|AAM-B|-|12q13.12|protein-coding	211.802	-0.00333486	0.345476	-0.00965294	0.992298	0.999987	25840	METTL7A
HSBP1L1|-|-|18q23|protein-coding	81.3937	-0.451892	0.39394	-1.14711	0.251337	0.999987	440498	HSBP1L1
NLN|AGTBP|EP24.16|MEP|MOP|-|5q12.3|protein-coding	2290.85	-0.0103184	0.146477	-0.0704435	0.943841	0.999987	57486	NLN
CNTN3|BIG-1|PANG|PCS|-|3p12.3|protein-coding	94.7348	0.366637	0.629614	0.58232	0.560351	0.999987	5067	CNTN3
MIR3164|-|-|11q13.3|ncRNA	0.513548	0.947749	3.21106	0.295152	0.767878	0.999987	100422846	MIR3164
FOXM1|FKHL16|FOXM1B|HFH-11|HFH11|HNF-3|INS-1|MPHOSPH2|MPP-2|MPP2|PIG29|TRIDENT|-|12p13.33|protein-coding	2128.92	0.181146	0.201471	0.899116	0.368591	0.999987	2305	FOXM1
PCDH19|EFMR|EIEE9|-|Xq22.1|protein-coding	2.88106	0.523411	1.39226	0.375944	0.706959	0.999987	57526	PCDH19
TMCC3|-|-|12q22|protein-coding	105.726	1.19452	0.45766	2.61006	0.0090526	0.999987	57458	TMCC3
CAMK1|CAMKI|-|3p25.3|protein-coding	390.657	0.0671324	0.165757	0.405004	0.685474	0.999987	8536	CAMK1
ESM1|endocan|-|5q11.2|protein-coding	299.744	0.561484	0.813924	0.689848	0.49029	0.999987	11082	ESM1
MPZL3|-|-|11q23.3|protein-coding	18.0156	-0.428717	0.837546	-0.511873	0.60874	0.999987	196264	MPZL3
APOM|G3a|HSPC336|NG20|apo-M|-|6p21.33|protein-coding	17.9671	0.391767	0.590337	0.663632	0.506926	0.999987	55937	APOM
MSMP|PSMP|-|9p13.3|protein-coding	1.69776	0.593835	1.96107	0.302811	0.762034	0.999987	692094	MSMP
LOC101927391|-|-|7p21.3|ncRNA	2.79593	-0.490072	1.20956	-0.405165	0.685356	0.999987	101927391	LOC101927391
YKT6|-|-|7p13|protein-coding	3891.51	0.00618186	0.093272	0.0662778	0.947157	0.999987	10652	YKT6
LOC100507547|-|-|6p21.32|ncRNA	5.97882	0.851504	0.898359	0.947844	0.343209	0.999987	100507547	LOC100507547
SLFN5|-|-|17q12|protein-coding	2145.13	-0.000843489	0.222591	-0.00378942	0.996976	0.999987	162394	SLFN5
NUDT16L1|SDOS|-|16p13.3|protein-coding	339.787	-0.0711921	0.160631	-0.443203	0.657619	0.999987	84309	NUDT16L1
JHDM1D-AS1|-|-|7q34|ncRNA	18.3432	0.392995	0.590478	0.665554	0.505696	0.999987	100134229	JHDM1D-AS1
STX2|EPIM|EPM|STX2A|STX2B|STX2C|-|12q24.33|protein-coding	1510.54	-0.00125028	0.131054	-0.0095402	0.992388	0.999987	2054	STX2
F2RL3|PAR4|-|19p13.11|protein-coding	45.0703	-0.627932	0.609247	-1.03067	0.302696	0.999987	9002	F2RL3
DINO|-|-|6p21|ncRNA	0.505517	0.919978	4.03853	0.2278	0.819801	0.999987	108783646	DINO
GPR68|AI2A6|GPR12A|OGR1|-|14q32.11|protein-coding	532.814	-0.055624	0.276869	-0.200903	0.840774	0.999987	8111	GPR68
SEC23B|CDA-II|CDAII|CDAN2|CWS7|HEMPAS|-|20p11.23|protein-coding	1766.1	0.156192	0.100139	1.55976	0.118817	0.999987	10483	SEC23B
CFAP20|C16orf80|EVORF|GTL3|fSAP23|-|16q21|protein-coding	611.591	-0.114204	0.130707	-0.873743	0.382258	0.999987	29105	CFAP20
IQUB|-|-|7q31.32|protein-coding	3.61083	-0.201342	1.16926	-0.172197	0.863283	0.999987	154865	IQUB
FAM228B|-|-|2p23.3|protein-coding	56.1166	-0.542266	0.356843	-1.51962	0.128606	0.999987	375190	FAM228B
HPSE2|HPA2|HPR2|UFS|UFS1|-|10q24.2|protein-coding	1.2851	0.812799	2.51693	0.322933	0.746746	0.999987	60495	HPSE2
GPN1|ATPBD1A|MBDIN|NTPBP|RPAP4|XAB1|-|2p23.3|protein-coding	1502.34	0.0437843	0.125902	0.347764	0.728017	0.999987	11321	GPN1
ABT1|hABT1|-|6p22.2|protein-coding	596.209	0.139036	0.121041	1.14867	0.250694	0.999987	29777	ABT1
UMPS|OPRT|-|3q21.2|protein-coding	981.874	0.102156	0.147437	0.692882	0.488383	0.999987	7372	UMPS
DMRT2|-|-|9p24.3|protein-coding	5.14405	-0.471848	1.22499	-0.385185	0.7001	0.999987	10655	DMRT2
NSRP1|CCDC55|HSPC095|NSrp70|-|17q11.2|protein-coding	804.819	0.12679	0.124753	1.01633	0.309474	0.999987	84081	NSRP1
FOXC1|ARA|FKHL7|FREAC-3|FREAC3|IGDA|IHG1|IRID1|RIEG3|-|6p25.3|protein-coding	50.8983	0.400906	0.430425	0.931419	0.351637	0.999987	2296	FOXC1
PARGP1|-|-|10q11.22|pseudo	20.0256	0.450321	0.516453	0.871951	0.383235	0.999987	728407	PARGP1
UCK1|URK1|-|9q34.13|protein-coding	479.246	-0.0391661	0.142044	-0.275732	0.782754	0.999987	83549	UCK1
MCOLN3|TRP-ML3|TRPML3|-|1p22.3|protein-coding	5.16995	0.308907	1.09752	0.28146	0.778358	0.999987	55283	MCOLN3
ANTXR1|ATR|GAPO|TEM8|-|2p13.3|protein-coding	1262.53	-0.099499	0.233517	-0.42609	0.670043	0.999987	84168	ANTXR1
TMCO6|PRO1580|-|5q31.3|protein-coding	191.811	0.0788767	0.240372	0.328145	0.742802	0.999987	55374	TMCO6
NPIPB3|KIAA0220L|NPIP|NPIPB|NPIPB5|NPIPL3|-|16p12.2|protein-coding	17.9823	-0.430502	0.725147	-0.593675	0.55273	0.999987	23117	NPIPB3
GAL3ST1|CST|-|22q12.2|protein-coding	1.93453	-0.921301	1.70441	-0.54054	0.588825	0.999987	9514	GAL3ST1
LRRC4|NAG14|NGL-2|-|7q32.1|protein-coding	30.9183	0.0149639	0.439386	0.0340564	0.972832	0.999987	64101	LRRC4
LOC654342|-|-|2p11.2|pseudo	100.594	-0.50579	0.501075	-1.00941	0.312779	0.999987	654342	LOC654342
KDF1|C1orf172|-|1p36.11|protein-coding	2.28503	0.00866637	1.59432	0.00543578	0.995663	0.999987	126695	KDF1
GCC2-AS1|-|-|2q12.3|ncRNA	1.01126	0.0553109	2.00115	0.0276396	0.97795	0.999987	644903	GCC2-AS1
GCKR|FGQTL5|GKRP|-|2p23.3|protein-coding	4.69601	-0.40463	1.03512	-0.390902	0.69587	0.999987	2646	GCKR
FLOT2|ECS-1|ECS1|ESA|ESA1|M17S1|-|17q11.2|protein-coding	2047.61	-0.111868	0.160546	-0.696794	0.485932	0.999987	2319	FLOT2
HSP90AB1|D6S182|HSP84|HSP90B|HSPC2|HSPCB|-|6p21.1|protein-coding	23955.1	-0.0564527	0.101524	-0.556054	0.578174	0.999987	3326	HSP90AB1
RPL31P11|RPL31_1_108|-|1q23.3|pseudo	1.63052	0.0510876	2.01546	0.0253478	0.979778	0.999987	641311	RPL31P11
LRRC29|FBL9|FBXL9|-|16q22.1|protein-coding	33.9478	0.262126	0.36545	0.717267	0.473209	0.999987	26231	LRRC29
PKD1|PBP|Pc-1|TRPP1|-|16p13.3|protein-coding	989.022	-0.0291258	0.200296	-0.145414	0.884384	0.999987	5310	PKD1
SPX|C12orf39|-|12p12.1|protein-coding	16.4571	-0.0451545	0.524977	-0.0860123	0.931457	0.999987	80763	SPX
ZNF574|FP972|-|19q13.2|protein-coding	258.998	0.0181755	0.182716	0.0994742	0.920762	0.999987	64763	ZNF574
CCDC50|C3orf6|DFNA44|YMER|-|3q28|protein-coding	2536.45	-0.101601	0.144958	-0.700901	0.483365	0.999987	152137	CCDC50
LOC102724467|-|-|16q24.2|ncRNA	0.679843	-1.47801	3.75129	-0.393999	0.693582	0.999987	102724467	LOC102724467
LOC645485|-|-|12p11.21|ncRNA	0.33086	0.0322791	4.08047	0.00791063	0.993688	0.999987	645485	LOC645485
CPNE4|COPN4|CPN4|-|3q22.1|protein-coding	0.471329	-0.784357	4.04512	-0.193902	0.846253	0.999987	131034	CPNE4
KIF4B|-|-|5q33.2|protein-coding	1.66748	-0.563892	1.80975	-0.311586	0.755355	0.999987	285643	KIF4B
GRAP2|GADS|GRAP-2|GRB2L|GRBLG|GRID|GRPL|GrbX|Grf40|Mona|P38|-|22q13.1|protein-coding	2.70168	0.0555817	1.43544	0.0387209	0.969113	0.999987	9402	GRAP2
MCFD2|F5F8D|F5F8D2|LMAN1IP|SDNSF|-|2p21|protein-coding	12120.6	-0.0486146	0.137484	-0.353601	0.723638	0.999987	90411	MCFD2
HARS2|HARSL|HARSR|HO3|PRLTS2|-|5q31.3|protein-coding	798.95	-0.000769889	0.112997	-0.00681337	0.994564	0.999987	23438	HARS2
APP|AAA|ABETA|ABPP|AD1|APPI|CTFgamma|CVAP|PN-II|PN2|-|21q21.3|protein-coding	23353.6	-0.0725921	0.214292	-0.338754	0.734795	0.999987	351	APP
ANKRD46|ANK-S|GENX-115279|-|8q22.3|protein-coding	145.003	0.174454	0.225737	0.77282	0.439629	0.999987	157567	ANKRD46
ZNF582-AS1|-|-|19q13.43|ncRNA	12.4891	-0.329238	0.654594	-0.502965	0.614989	0.999987	386758	ZNF582-AS1
IKBKB|IKK-beta|IKK2|IKKB|IMD15|NFKBIKB|-|8p11.21|protein-coding	1114.36	0.0140831	0.114388	0.123117	0.902014	0.999987	3551	IKBKB
HMGB2|HMG2|-|4q34.1|protein-coding	2390.86	0.272052	0.250338	1.08674	0.277152	0.999987	3148	HMGB2
TSGA10IP|FAM161C|-|11q13.1|protein-coding	1.49796	1.90281	2.01351	0.945019	0.344649	0.999987	254187	TSGA10IP
MCM7|CDC47|MCM2|P1.1-MCM3|P1CDC47|P85MCM|PNAS146|PPP1R104|-|7q22.1|protein-coding	3318.52	0.237947	0.239491	0.993552	0.320441	0.999987	4176	MCM7
CCDC107|PSEC0222|-|9p13.3|protein-coding	506.846	-0.138165	0.142699	-0.968231	0.332929	0.999987	203260	CCDC107
OR52N4|OR11-64|-|11p15.4|protein-coding	0.625683	-1.36643	3.82762	-0.356993	0.721097	0.999987	390072	OR52N4
FBXO22|FBX22|FISTC1|-|15q24.2|protein-coding	644.782	0.226325	0.149655	1.51231	0.130454	0.999987	26263	FBXO22
REST|NRSF|WT6|XBR|-|4q12|protein-coding	1094.65	0.0282752	0.131527	0.214976	0.829786	0.999987	5978	REST
PHC1|EDR1|HPH1|MCPH11|RAE28|-|12p13.31|protein-coding	41.2142	0.278807	0.387621	0.719276	0.471971	0.999987	1911	PHC1
TNFSF13B|BAFF|BLYS|CD257|DTL|TALL-1|TALL1|THANK|TNFSF20|TNLG7A|ZTNF4|-|13q33.3|protein-coding	8.3404	-0.478924	0.84351	-0.567775	0.570188	0.999987	10673	TNFSF13B
GPX4|GPx-4|GSHPx-4|MCSP|PHGPx|SMDS|snGPx|snPHGPx|-|19p13.3|protein-coding	1707.19	-0.279493	0.17771	-1.57275	0.115776	0.999987	2879	GPX4
NCAN|CSPG3|-|19p13.11|protein-coding	1.31906	0.792044	1.84767	0.428671	0.668163	0.999987	1463	NCAN
FURIN|FUR|PACE|PCSK3|SPC1|-|15q26.1|protein-coding	2363.9	-0.0734046	0.197611	-0.371459	0.710295	0.999987	5045	FURIN
CSE1L|CAS|CSE1|XPO2|-|20q13.13|protein-coding	5224.66	0.228438	0.171228	1.33412	0.182165	0.999987	1434	CSE1L
LINC01117|-|-|2q31.1|ncRNA	17.6201	0.253249	0.590329	0.428997	0.667926	0.999987	102724224	LINC01117
APPBP2|APP-BP2|HS.84084|PAT1|-|17q23.2|protein-coding	1103.68	-0.0301927	0.109332	-0.276156	0.782428	0.999987	10513	APPBP2
LOC728084|-|-|12q21.33|ncRNA	0.651382	-2.81206	3.62646	-0.775429	0.438086	0.999987	728084	LOC728084
LOC729218|-|-|4q26|pseudo	48.6269	0.20993	0.305031	0.688224	0.491312	0.999987	729218	LOC729218
C1orf56|MENT|-|1q21.3|protein-coding	21.8421	-0.233248	0.472058	-0.494108	0.62123	0.999987	54964	C1orf56
FCHO1|-|-|19p13.11|protein-coding	10.3316	-0.733095	0.652341	-1.12379	0.261102	0.999987	23149	FCHO1
SLFN13|SLFN10|-|17q12|protein-coding	34.4646	0.182255	0.455217	0.400369	0.688885	0.999987	146857	SLFN13
RGP1|KIAA0258|-|9p13.3|protein-coding	284.376	0.00360651	0.171351	0.0210475	0.983208	0.999987	9827	RGP1
KCNQ5|Kv7.5|-|6q13|protein-coding	69.3141	-0.65241	0.412428	-1.58188	0.113678	0.999987	56479	KCNQ5
GFRA3|GDNFR3|-|5q31.2|protein-coding	0.633948	0.0687852	3.81102	0.018049	0.9856	0.999987	2676	GFRA3
PSMD3|P58|RPN3|S3|TSTA2|-|17q21.1|protein-coding	3370.74	0.00598497	0.0925701	0.0646534	0.94845	0.999987	5709	PSMD3
TMEM204|C16orf30|CLP24|-|16p13.3|protein-coding	571.703	-0.273104	0.165044	-1.65473	0.0979797	0.999987	79652	TMEM204
PLA1A|PS-PLA1|PSPLA1|-|3q13.33|protein-coding	3.76462	-1.78236	1.23483	-1.4434	0.148907	0.999987	51365	PLA1A
THAP7-AS1|-|-|22q11.21|ncRNA	16.5151	0.744338	0.655683	1.13521	0.256287	0.999987	439931	THAP7-AS1
GFM2|EF-G2mt|EFG2|MRRF2|MST027|MSTP027|RRF2|RRF2mt|hEFG2|mEF-G 2|-|5q13.3|protein-coding	1078.23	-0.0133069	0.10635	-0.125124	0.900425	0.999987	84340	GFM2
SH3GL3|CNSA3|EEN-B2|HsT19371|SH3D2C|SH3P13|-|15q25.2|protein-coding	2.19043	2.5072	1.60971	1.55755	0.119341	0.999987	6457	SH3GL3
SLC7A11|CCBR1|xCT|-|4q28.3|protein-coding	3546.26	-0.195709	0.335229	-0.583807	0.55935	0.999987	23657	SLC7A11
LRRC39|-|-|1p21.2|protein-coding	9.56121	0.547314	0.758503	0.721571	0.470558	0.999987	127495	LRRC39
LINC00327|NCRNA00327|-|13q12.12|ncRNA	75.0382	-0.533	0.676514	-0.787863	0.430777	0.999987	100506697	LINC00327
BFAR|BAR|RNF47|-|16p13.12|protein-coding	2169.56	-0.0633754	0.10597	-0.598053	0.549804	0.999987	51283	BFAR
RNF114|PSORS12|ZNF313|-|20q13.13|protein-coding	1039.87	0.00145822	0.108482	0.0134421	0.989275	0.999987	55905	RNF114
TTC6|C14orf25|NCRNA00291|-|14q21.1|protein-coding	0.835227	1.91186	2.82385	0.67704	0.49838	0.999987	319089	TTC6
ACSL6|ACS2|FACL6|LACS 6|LACS2|LACS5|-|5q31.1|protein-coding	0.673534	-1.49056	2.97746	-0.500615	0.616642	0.999987	23305	ACSL6
GTF2A2|HsT18745|T18745|TF2A2|TFIIA|TFIIA-12|TFIIA-gamma|TFIIAS|-|15q22.2|protein-coding	926.641	0.234671	0.140613	1.66892	0.095133	0.999987	2958	GTF2A2
SPDEF|PDEF|bA375E1.3|-|6p21.31|protein-coding	1.16826	1.36427	1.91253	0.713335	0.475639	0.999987	25803	SPDEF
PPP3CB|CALNA2|CALNB|CNA2|PP2Bbeta|-|10q22.2|protein-coding	1199.9	0.112882	0.123951	0.9107	0.362453	0.999987	5532	PPP3CB
LUZP2|KFSP2566|PRO6246|-|11p14.3|protein-coding	0.32971	1.86485	4.04005	0.46159	0.644375	0.999987	338645	LUZP2
ST6GALNAC3|PRO7177|SIAT7C|ST6GALNACIII|STY|-|1p31.1|protein-coding	7.07783	0.59527	0.886726	0.671312	0.502022	0.999987	256435	ST6GALNAC3
DNAJA2|CPR3|DJ3|DJA2|DNAJ|DNJ3|HIRIP4|PRO3015|RDJ2|-|16q11.2|protein-coding	1604.47	-0.0141614	0.109329	-0.12953	0.896938	0.999987	10294	DNAJA2
PTPRO|GLEPP1|NPHS6|PTP-OC|PTP-U2|PTPROT|PTPU2|R-PTP-O|-|12p12.3|12p13-p12|protein-coding	3.17246	1.89298	1.43758	1.31678	0.187911	0.999987	5800	PTPRO
INTS6L|DDX26B|-|Xq26.3|protein-coding	96.4645	-0.110641	0.248613	-0.445033	0.656296	0.999987	203522	INTS6L
ANAPC4|APC4|-|4p15.2|protein-coding	717.064	0.117766	0.143991	0.817869	0.413432	0.999987	29945	ANAPC4
LOC728392|-|-|17p13.2|protein-coding	53.0941	0.0650912	0.452592	0.143819	0.885644	0.999987	728392	LOC728392
FBXO38|Fbx38|HMN2D|MOKA|SP329|-|5q32|protein-coding	1054.51	0.02143	0.129846	0.165042	0.868911	0.999987	81545	FBXO38
LINC01032|-|-|1q31.2|ncRNA	0.855535	0.59167	2.82859	0.209175	0.834312	0.999987	102724954	LINC01032
KEL|CD238|ECE3|-|7q34|protein-coding	1.32744	-3.83629	2.24007	-1.71257	0.0867911	0.999987	3792	KEL
EIF3J|EIF3S1|eIF3-alpha|eIF3-p35|-|15q21.1|protein-coding	1762.19	0.116397	0.135713	0.857674	0.391072	0.999987	8669	EIF3J
CCL14|CC-1|CC-3|CKB1|HCC-1|HCC-1(1-74)|HCC-1/HCC-3|HCC-3|MCIF|NCC-2|NCC2|SCYA14|SCYL2|SY14|-|17q12|protein-coding	23.9944	-0.89217	1.43063	-0.623622	0.532876	0.999987	6358	CCL14
OAF|NS5ATP13TP2|-|11q23.3|protein-coding	2214.8	0.204523	0.164063	1.24661	0.21254	0.999987	220323	OAF
HS1BP3|ETM2|HS1-BP3|-|2p24.1|protein-coding	391.19	-0.0650133	0.154192	-0.421639	0.673289	0.999987	64342	HS1BP3
DISP2|DISPB|HsT16908|LINC00594|-|15q15.1|protein-coding	94.0307	0.0625478	0.687739	0.0909471	0.927535	0.999987	85455	DISP2
TCEA2|TFIIS|-|20q13.33|protein-coding	110.885	-0.18168	0.345211	-0.526288	0.598688	0.999987	6919	TCEA2
DAAM1|-|-|14q23.1|protein-coding	176.939	-0.460205	0.240607	-1.91268	0.0557887	0.999987	23002	DAAM1
ABCB7|ABC7|ASAT|Atm1p|EST140535|-|Xq13.3|protein-coding	448.933	0.0637047	0.140368	0.453839	0.649945	0.999987	22	ABCB7
CAGE1|CT3|CT95|CTAG3|bA69L16.7|-|6p24.3|protein-coding	0.512862	2.49612	3.95981	0.630364	0.528456	0.999987	285782	CAGE1
AHCY|SAHH|adoHcyase|-|20q11.22|protein-coding	3003.07	-0.0552317	0.15505	-0.356218	0.721677	0.999987	191	AHCY
VWA5A|BCSC-1|BCSC1|LOH11CR2A|-|11q24.2|protein-coding	68.771	-0.298376	0.448994	-0.664542	0.506343	0.999987	4013	VWA5A
PRSS35|C6orf158|dJ223E3.1|-|6q14.2|protein-coding	3.81787	0.155136	1.043	0.14874	0.881759	0.999987	167681	PRSS35
RBMX2|CGI-79|Snu17|-|Xq26.1|protein-coding	434.03	0.00947265	0.173765	0.0545142	0.956525	0.999987	51634	RBMX2
HSPA12A|-|-|10q25.3|protein-coding	166.215	0.443123	0.489195	0.905822	0.36503	0.999987	259217	HSPA12A
CMSS1|C3orf26|-|3q12.1|protein-coding	554.32	0.205059	0.210876	0.972415	0.330844	0.999987	84319	CMSS1
IPMK|-|-|10q21.1|protein-coding	151.73	-0.117022	0.222926	-0.524938	0.599626	0.999987	253430	IPMK
FAM110B|C8orf72|-|8q12.1|protein-coding	37.4714	0.362418	0.388005	0.934056	0.350275	0.999987	90362	FAM110B
DPP8|DP8|DPRP-1|DPRP1|MST097|MSTP097|MSTP135|MSTP141|-|15q22.31|protein-coding	1441.78	-0.0260208	0.1273	-0.204406	0.838037	0.999987	54878	DPP8
DARS|HBSL|aspRS|-|2q21.3|protein-coding	2193.39	0.124493	0.162396	0.766601	0.443319	0.999987	1615	DARS
GATA3|HDR|HDRS|-|10p14|protein-coding	5.35155	-0.779816	1.47667	-0.528091	0.597436	0.999987	2625	GATA3
MRC1|CD206|CLEC13D|CLEC13DL|MMR|MRC1L1|bA541I19.1|hMR|-|10p12.33|protein-coding	9.91434	-1.82635	1.09711	-1.66469	0.0959745	0.999987	4360	MRC1
PLAUR|CD87|U-PAR|UPAR|URKR|-|19q13.31|protein-coding	1769.13	-0.0232187	0.0890155	-0.260838	0.794217	0.999987	5329	PLAUR
GALNT9|GALNAC-T9|GALNACT9|-|12q24.33|protein-coding	0.990497	-0.938863	2.01552	-0.465817	0.641347	0.999987	50614	GALNT9
FBXL5|FBL4|FBL5|FLR1|-|4p15.32|protein-coding	2085.65	-0.149163	0.13547	-1.10108	0.270861	0.999987	26234	FBXL5
PLPP1|LLP1a|LPP1|PAP-2a|PAP2|PPAP2A|-|5q11.2|protein-coding	773.095	-0.0560874	0.134428	-0.41723	0.676511	0.999987	8611	PLPP1
CBR3-AS1|PlncRNA-1|PlncRNA1|-|21q22.12|ncRNA	17.3841	0.2487	0.551001	0.451361	0.65173	0.999987	100506428	CBR3-AS1
FKBP15|FKBP133|KIAA0674|PPP1R76|-|9q32|protein-coding	1298.78	-0.0824246	0.107427	-0.767261	0.442927	0.999987	23307	FKBP15
PLP2|A4|A4LSB|-|Xp11.23|protein-coding	2993.87	0.0622923	0.149344	0.417105	0.676602	0.999987	5355	PLP2
NOXA1|NY-CO-31|SDCCAG31|p51NOX|-|9q34.3|protein-coding	0.65092	0.121795	3.03839	0.0400852	0.968025	0.999987	10811	NOXA1
LOC100996419|-|-|5q35.3|ncRNA	7.32428	-0.370709	0.805144	-0.460426	0.645211	0.999987	100996419	LOC100996419
SMC5-AS1|MAMDC2-AS2|-|9q21.12|ncRNA	4.4946	-0.507436	0.935256	-0.542564	0.58743	0.999987	100507299	SMC5-AS1
C19orf60|-|-|19p13.11|protein-coding	117.129	-0.0640708	0.283517	-0.225986	0.821213	0.999987	55049	C19orf60
LMO7DN-IT1|C13orf45-IT1|TCONS_00021569|-|13q22.2|ncRNA	0.350242	1.94074	4.03333	0.481175	0.630392	0.999987	104326189	LMO7DN-IT1
TRIP13|16E1BP|-|5p15.33|protein-coding	1132.69	0.2679	0.22988	1.16539	0.24386	0.999987	9319	TRIP13
KIAA0232|-|-|4p16.1|protein-coding	1117.04	-0.0642682	0.128528	-0.500034	0.617051	0.999987	9778	KIAA0232
NUP85|FROUNT|Nup75|-|17q25.1|protein-coding	1084.24	0.0488103	0.154546	0.31583	0.752131	0.999987	79902	NUP85
FCRLB|FCRL2|FCRLM2|FCRLY|FREB-2|FREB2|FcRY|-|1q23.3|protein-coding	138.629	0.230614	0.448089	0.514662	0.606789	0.999987	127943	FCRLB
SNORA60|ACA60|-|20q11.23|snoRNA	1.01081	2.2521	2.21995	1.01448	0.310354	0.999987	677837	SNORA60
GBP7|GBP4L|-|1p22.2|protein-coding	0.672837	0.0994524	3.02345	0.0328936	0.973759	0.999987	388646	GBP7
N4BP2L2|92M18.3|CG005|CG016|PFAAP5|-|13q13.1|protein-coding	811.44	0.0289483	0.11938	0.242489	0.808401	0.999987	10443	N4BP2L2
PTGS2|COX-2|COX2|GRIPGHS|PGG/HS|PGHS-2|PHS-2|hCox-2|-|1q31.1|protein-coding	24.4306	1.27742	1.02269	1.24908	0.211636	0.999987	5743	PTGS2
ADAMTS17|-|-|15q26.3|protein-coding	0.977761	-2.15715	2.27934	-0.94639	0.34395	0.999987	170691	ADAMTS17
DCST2|-|-|1q21.3|protein-coding	1.81792	-0.208655	1.44508	-0.14439	0.885193	0.999987	127579	DCST2
WNT9A|WNT14|-|1q42.13|protein-coding	18.4641	0.305545	0.683269	0.447181	0.654745	0.999987	7483	WNT9A
DGKA|DAGK|DAGK1|DGK-alpha|-|12q13.2|protein-coding	933.082	0.00480692	0.191408	0.0251134	0.979965	0.999987	1606	DGKA
ATP5O|ATPO|HMC08D05|OSCP|-|21q22.11|protein-coding	2655.86	0.0474523	0.106011	0.447616	0.65443	0.999987	539	ATP5O
KRTAP1-5|KAP1.5|KRTAP1.5|-|17q21.2|protein-coding	74.3573	-0.879693	0.580319	-1.51588	0.12955	0.999987	83895	KRTAP1-5
CBS|HIP4|-|21q22.3|protein-coding	477.747	0.0890678	0.311888	0.285576	0.775203	0.999987	875	CBS
GRTP1-AS1|-|-|13q34|ncRNA	0.826738	-0.579106	2.40545	-0.240747	0.809751	0.999987	100874068	GRTP1-AS1
ZXDA|ZNF896|-|Xp11.21|protein-coding	56.735	-0.0478329	0.301075	-0.158874	0.873768	0.999987	7789	ZXDA
LOC100652768|-|-|11q23.3|ncRNA	18.7009	-0.234164	0.507438	-0.461463	0.644466	0.999987	100652768	LOC100652768
NFATC4|NF-AT3|NF-ATC4|NFAT3|-|14q12|protein-coding	222.721	-0.0886426	0.188931	-0.469179	0.638942	0.999987	4776	NFATC4
ZNF69|Cos5|hZNF3|-|19p13.2|protein-coding	32.3614	-0.795456	0.42822	-1.85759	0.0632274	0.999987	7620	ZNF69
LONP1|CODASS|LON|LONP|LonHS|PIM1|PRSS15|hLON|-|19p13.3|protein-coding	1219.46	0.0652509	0.155377	0.419951	0.674521	0.999987	9361	LONP1
HHLA3|-|-|1p31.1|protein-coding	57.7868	-0.406105	0.374911	-1.08321	0.278717	0.999987	11147	HHLA3
MIR924HG|LINC00669|-|18q12.2-q12.3|ncRNA	10.3932	-1.38834	0.784912	-1.76879	0.0769297	0.999987	647946	MIR924HG
BCL6|BCL5|BCL6A|LAZ3|ZBTB27|ZNF51|-|3q27.3|protein-coding	699.004	0.00387155	0.113124	0.0342239	0.972699	0.999987	604	BCL6
GAD1|CPSQ1|GAD|SCP|-|2q31.1|protein-coding	1.11135	-3.58741	2.53361	-1.41593	0.156797	0.999987	2571	GAD1
ELMSAN1|C14orf117|C14orf43|LSR68|MIDEAS|c14_5541|-|14q24.3|protein-coding	750.232	-0.152191	0.158368	-0.960997	0.336554	0.999987	91748	ELMSAN1
PIGU|CDC91L1|GAB1|-|20q11.22|protein-coding	441.802	0.0276073	0.135603	0.203589	0.838675	0.999987	128869	PIGU
EYS|C6orf178|C6orf179|C6orf180|EGFL10|EGFL11|RP25|SPAM|bA166P24.2|bA307F22.3|bA74E24.1|dJ1018A4.2|dJ22I17.2|dJ303F19.1|-|6q12|protein-coding	1.8279	0.32968	1.62645	0.202699	0.83937	0.999987	346007	EYS
STEAP1B|-|-|7p15.3|protein-coding	1054.13	0.281114	0.14797	1.8998	0.0574594	0.999987	256227	STEAP1B
CASKIN1|ANKS5A|-|16p13.3|protein-coding	0.667902	0.0595189	2.55519	0.0232933	0.981416	0.999987	57524	CASKIN1
MIR6506|hsa-mir-6506|-|16p13.11|ncRNA	10.6156	-0.0645006	0.63139	-0.102157	0.918632	0.999987	102465252	MIR6506
PAK4|-|-|19q13.2|protein-coding	509.329	0.210738	0.202345	1.04147	0.297655	0.999987	10298	PAK4
ZNF20|KOX13|-|19p13.2|protein-coding	98.9786	-0.0574156	0.223485	-0.25691	0.797248	0.999987	7568	ZNF20
MAGEB17|-|-|Xp22.2|protein-coding	0.512862	2.49612	3.95981	0.630364	0.528456	0.999987	645864	MAGEB17
KATNBL1|C15orf29|-|15q14|protein-coding	471.664	0.0724807	0.178716	0.405563	0.685064	0.999987	79768	KATNBL1
ZNF736|-|-|7q11.21|protein-coding	159.058	0.222948	0.290875	0.766474	0.443394	0.999987	728927	ZNF736
THG1L|ICF45|IHG-1|hTHG1|-|5q33.3|protein-coding	307.114	0.10196	0.182403	0.558981	0.576175	0.999987	54974	THG1L
HCG17|HCG18|LINC00046|NCRNA00046|-|6p22.1|ncRNA	2.17998	0.769414	1.67384	0.459669	0.645754	0.999987	414778	HCG17
LOC645166|-|-|1q21.1|pseudo	174.318	-0.376628	0.241195	-1.56151	0.118404	0.999987	645166	LOC645166
C6orf47|D6S53E|G4|NG34|-|6p21.33|protein-coding	419.603	-0.0365054	0.142254	-0.256622	0.797471	0.999987	57827	C6orf47
BSDC1|-|-|1p35.1|protein-coding	1362.24	-0.197553	0.155485	-1.27056	0.203884	0.999987	55108	BSDC1
THOC2|CXorf3|MRX12|MRX35|THO2|dJ506G2.1|hTREX120|-|Xq25|protein-coding	1747.25	0.0291794	0.125048	0.233345	0.815493	0.999987	57187	THOC2
ADAMTSL2|GPHYSD1|-|9q34.2|protein-coding	0.674908	-1.48323	2.97432	-0.498681	0.618004	0.999987	9719	ADAMTSL2
SLC30A7|ZNT7|ZnT-7|ZnTL2|-|1p21.2|protein-coding	892.477	0.0755142	0.14458	0.522302	0.60146	0.999987	148867	SLC30A7
ALOX12B|12R-LOX|ARCI2|-|17p13.1|protein-coding	0.647136	-1.41532	2.99386	-0.472741	0.636398	0.999987	242	ALOX12B
TIMMDC1|C3orf1|-|3q13.33|protein-coding	1334.34	0.0432929	0.0951158	0.45516	0.648994	0.999987	51300	TIMMDC1
FRG2C|-|-|3p12.3|protein-coding	1.01907	0.994978	2.72079	0.365695	0.714593	0.999987	100288801	FRG2C
PTPN20|CT126|PTPN20A|PTPN20B|bA142I17.1|bA42B19.1|-|10q11.22|protein-coding	0.500812	-0.85179	3.22804	-0.263873	0.791878	0.999987	26095	PTPN20
RAB18|RAB18LI1|WARBM3|-|10p12.1|protein-coding	1651.25	0.0555315	0.103353	0.537297	0.591063	0.999987	22931	RAB18
RASL11B|-|-|4q12|protein-coding	8.11166	0.298668	1.12019	0.266623	0.78976	0.999987	65997	RASL11B
JAK2|JTK10|THCYT3|-|9p24.1|protein-coding	359.896	0.144845	0.146708	0.987304	0.323494	0.999987	3717	JAK2
KDM3B|5qNCA|C5orf7|JMJD1B|NET22|-|5q31.2|protein-coding	1441.53	-0.110452	0.108988	-1.01343	0.310854	0.999987	51780	KDM3B
PIR|-|-|Xp22.2|protein-coding	414.497	0.362918	0.407452	0.890701	0.37309	0.999987	8544	PIR
HMGCS1|HMGCS|-|5p12|protein-coding	10784.5	0.0506473	0.275659	0.183732	0.854224	0.999987	3157	HMGCS1
CNTNAP1|CASPR|CNTNAP|NRXN4|P190|-|17q21.2|protein-coding	1061.55	-0.13821	0.258606	-0.534443	0.593035	0.999987	8506	CNTNAP1
UFSP2|BHD|C4orf20|-|4q35.1|protein-coding	502.449	-0.00709754	0.121243	-0.0585399	0.953319	0.999987	55325	UFSP2
L3HYPDH|C14orf149|-|14q23.1|protein-coding	431.248	-0.0603601	0.181198	-0.333116	0.739046	0.999987	112849	L3HYPDH
OOEP|C6orf156|FLOPED|HOEP19|KHDC2|-|6q13|protein-coding	0.496576	0.886025	4.04161	0.219226	0.826474	0.999987	441161	OOEP
LOC400464|-|-|15q26.3|pseudo	17.1091	-0.366549	0.611153	-0.599767	0.548662	0.999987	400464	LOC400464
MIR6759|hsa-mir-6759|-|12q14.1|ncRNA	0.329475	0.0322791	4.08047	0.00791063	0.993688	0.999987	102466729	MIR6759
EGR3|EGR-3|PILOT|-|8p21.3|protein-coding	1.80898	-1.4033	1.67393	-0.838327	0.401847	0.999987	1960	EGR3
KIAA2026|-|-|9p24.1|protein-coding	553.074	-0.00604736	0.142801	-0.042348	0.966221	0.999987	158358	KIAA2026
ALS2CR11|-|-|2q33.1|protein-coding	17.493	0.30571	0.647308	0.472279	0.636728	0.999987	151254	ALS2CR11
FAM78B|-|-|1q24.1|protein-coding	4.9744	0.471814	1.13823	0.414516	0.678496	0.999987	149297	FAM78B
DRAM2|CORD21|PRO180|TMEM77|WWFQ154|-|1p13.3|protein-coding	569.134	-0.0203909	0.115622	-0.176358	0.860013	0.999987	128338	DRAM2
GUCA1B|GCAP2|GUCA2|RP48|-|6p21.1|protein-coding	11.0867	-0.171068	0.63617	-0.268902	0.788005	0.999987	2979	GUCA1B
NT5E|CALJA|CD73|E5NT|NT|NT5|NTE|eN|eNT|-|6q14.3|protein-coding	10723.7	0.214833	0.163458	1.3143	0.188746	0.999987	4907	NT5E
EEF1AKMT1|ESP13|N6AMT2|-|13q12.11|protein-coding	201.165	0.00244494	0.18676	0.0130913	0.989555	0.999987	221143	EEF1AKMT1
SEPT2|DIFF6|NEDD-5|NEDD5|Pnutl3|hNedd5|-|2q37.3|protein-coding	12024.7	-0.00538444	0.0894904	-0.0601678	0.952022	0.999987	4735	2019-09-02
H2AFY|H2A.y|H2A/y|H2AF12M|MACROH2A1.1|mH2A1|macroH2A1.2|-|5q31.1|protein-coding	2496.71	0.00942246	0.0863287	0.109146	0.913086	0.999987	9555	H2AFY
TSACC|C1orf182|SIP|SSTK-IP|-|1q22|protein-coding	3.00168	0.682513	1.19933	0.569081	0.569301	0.999987	128229	TSACC
TRMT10C|COXPD30|HNYA|MRPP1|RG9MTD1|-|3q12.3|protein-coding	628.637	0.161967	0.192666	0.840664	0.400536	0.999987	54931	TRMT10C
AZIN1|AZI|AZIA1|OAZI|OAZIN|ODC1L|-|8q22.3|protein-coding	3410.91	0.0769322	0.113113	0.680138	0.496417	0.999987	51582	AZIN1
COX5A|COX|COX-VA|VA|-|15q24.2|protein-coding	1270.29	0.0996673	0.110805	0.899481	0.368397	0.999987	9377	COX5A
NANOS3|NANOS1L|NOS3|ZC2HC12C|-|19p13.12|protein-coding	2.35328	-1.27485	1.56986	-0.812076	0.416748	0.999987	342977	NANOS3
METTL8|TIP|-|2q31.1|protein-coding	546.698	0.0285753	0.145167	0.196845	0.843949	0.999987	79828	METTL8
MIR155|MIRN155|miRNA155|mir-155|-|21q21.3|ncRNA	0.671921	2.88833	2.85278	1.01246	0.311317	0.999987	406947	MIR155
PHOSPHO2-KLHL23|-|-|2q31.1|protein-coding	32.2974	0.128875	0.631257	0.204156	0.838232	0.999987	100526832	PHOSPHO2-KLHL23
CPPED1|CSTP1|-|16p13.12|protein-coding	3101.06	-0.163869	0.171737	-0.954181	0.339992	0.999987	55313	CPPED1
PLEKHA8P1|PLEKHA9|-|12q12|pseudo	35.2287	0.00115396	0.411356	0.00280526	0.997762	0.999987	51054	PLEKHA8P1
ZNF137P|ZNF137|pHZ-30|-|19q13.41|pseudo	29.0925	-0.0252246	0.43173	-0.0584269	0.953409	0.999987	7696	ZNF137P
NEDD8-MDP1|-|-|14q12|protein-coding	1131.03	-0.0178774	0.106547	-0.167789	0.866749	0.999987	100528064	NEDD8-MDP1
DCHS1|CDH19|CDH25|CDHR6|FIB1|MVP2|PCDH16|VMLDS1|-|11p15.4|protein-coding	726.081	-0.104564	0.322513	-0.324216	0.745775	0.999987	8642	DCHS1
LOC441178|-|-|6q27|ncRNA	6.32045	-1.43348	1.14912	-1.24747	0.212227	0.999987	441178	LOC441178
NPTN|GP55|GP65|SDFR1|SDR1|np55|np65|-|15q24.1|protein-coding	2183.44	-0.118339	0.151557	-0.780824	0.434906	0.999987	27020	NPTN
CEP104|CFAP256|GlyBP|JBTS25|KIAA0562|ROC22|-|1p36.32|protein-coding	705.534	-0.185388	0.124827	-1.48516	0.137502	0.999987	9731	CEP104
ZC3H12C|MCPIP3|-|11q22.3|protein-coding	1071.44	-0.120809	0.177182	-0.681836	0.495343	0.999987	85463	ZC3H12C
KLHL42|Ctb9|KLHDC5|-|12p11.22|protein-coding	727.494	0.228011	0.115571	1.97292	0.0485048	0.999987	57542	KLHL42
LINC00311|NCRNA00311|TMEM148|-|16q24.1|ncRNA	1.6903	3.10206	1.91554	1.61942	0.105357	0.999987	197196	LINC00311
RNF38|-|-|9p13.2|protein-coding	521.532	-0.0066603	0.147907	-0.0450303	0.964083	0.999987	152006	RNF38
MYO1A|BBMI|DFNA48|MIHC|MYHL|-|12q13.3|protein-coding	0.843944	0.559016	3.55902	0.15707	0.875189	0.999987	4640	MYO1A
MT1JP|MT1|MT1J|MT1NP|MTB|-|16q13|pseudo	1.50991	1.00471	2.0295	0.495053	0.620562	0.999987	4498	MT1JP
ADGRG2|CBAVDX|EDDM6|GPR64|HE6|TM7LN2|-|Xp22.13|protein-coding	17.2407	-1.42657	0.856614	-1.66536	0.0958412	0.999987	10149	ADGRG2
UBQLN4|A1U|A1Up|C1orf6|CIP75|UBIN|-|1q22|protein-coding	495.415	0.0763163	0.141627	0.538855	0.589987	0.999987	56893	UBQLN4
MAP4K3|GLK|MAPKKKK3|MEKKK 3|MEKKK3|RAB8IPL1|-|2p22.1|protein-coding	543.006	0.0826931	0.136391	0.606292	0.544321	0.999987	8491	MAP4K3
MIR4800|mir-4800|-|4p16.3|ncRNA	27.9273	0.261031	0.435313	0.59964	0.548746	0.999987	100616358	MIR4800
ARFGAP1|ARF1GAP|HRIHFB2281|-|20q13.33|protein-coding	1477.66	0.054325	0.109194	0.497509	0.61883	0.999987	55738	ARFGAP1
DHRS4L2|SDR25C3|-|14q11.2|protein-coding	106.027	0.266745	0.320895	0.831252	0.405831	0.999987	317749	DHRS4L2
BACH1-IT2|-|-|21q21.3|ncRNA	0.833057	-0.623318	2.83893	-0.219561	0.826213	0.999987	100874322	BACH1-IT2
NUP160|-|-|11p11.2|protein-coding	1379.39	0.022138	0.172919	0.128025	0.898129	0.999987	23279	NUP160
CNN1|HEL-S-14|SMCC|Sm-Calp|-|19p13.2|protein-coding	7.06826	-2.90253	1.78222	-1.62861	0.103396	0.999987	1264	CNN1
UBXN6|UBXD1|UBXDC2|-|19p13.3|protein-coding	1474.91	0.0564505	0.141378	0.399289	0.68968	0.999987	80700	UBXN6
FANCD2|FA-D2|FA4|FACD|FAD|FAD2|FANCD|-|3p25.3|protein-coding	543.272	0.344098	0.277354	1.24065	0.214737	0.999987	2177	FANCD2
ACADVL|ACAD6|LCACD|VLCAD|-|17p13.1|protein-coding	2523.35	-0.126297	0.173498	-0.727944	0.466648	0.999987	37	ACADVL
FAIM2|LFG|LFG2|NGP35|NMP35|TMBIM2|-|12q13.12|protein-coding	0.346458	0.0322791	4.08047	0.00791063	0.993688	0.999987	23017	FAIM2
SH3BGRL2|-|-|6q14.1|protein-coding	66.4064	0.373665	0.494882	0.75506	0.450213	0.999987	83699	SH3BGRL2
SNX25|MSTP043|SBBI31|-|4q35.1|protein-coding	448.992	0.118733	0.1296	0.916147	0.35959	0.999987	83891	SNX25
MIR106B|MIRN106B|mir-106b|-|7q22.1|ncRNA	0.337741	1.89482	4.03736	0.469322	0.63884	0.999987	406900	MIR106B
NUP155|ATFB15|N155|-|5p13.2|protein-coding	1118.34	0.136424	0.213572	0.638774	0.52297	0.999987	9631	NUP155
PPP6R1|KIAA1115|PP6R1|SAP190|SAPS1|-|19q13.42|protein-coding	1716.39	-0.034794	0.0869222	-0.400289	0.688944	0.999987	22870	PPP6R1
WDR61|REC14|SKI8|-|15q25.1|protein-coding	980.981	0.00544438	0.110774	0.0491485	0.960801	0.999987	80349	WDR61
NR1I2|BXR|ONR1|PAR|PAR1|PAR2|PARq|PRR|PXR|SAR|SXR|-|3q13.33|protein-coding	0.661022	-1.44936	2.51884	-0.575407	0.565016	0.999987	8856	NR1I2
STT3B|CDG1X|SIMP|STT3-B|-|3p23|protein-coding	5490.37	0.0847401	0.167257	0.506647	0.612403	0.999987	201595	STT3B
SNCB|-|-|5q35.2|protein-coding	0.805509	0.667358	2.84866	0.234271	0.814775	0.999987	6620	SNCB
PNPT1|COXPD13|DFNB70|OLD35|PNPASE|old-35|-|2p16.1|protein-coding	1010.8	0.25962	0.134856	1.92517	0.054208	0.999987	87178	PNPT1
STAG3L5P-PVRIG2P-PILRB|LOC101735302-LOC101752334-PILRB|-|7q22.1|ncRNA	302.69	0.117083	0.218639	0.535507	0.5923	0.999987	101752399	STAG3L5P-PVRIG2P-PILRB
TNFRSF1A|CD120a|FPF|TBP1|TNF-R|TNF-R-I|TNF-R55|TNFAR|TNFR1|TNFR55|TNFR60|p55|p55-R|p60|-|12p13.31|protein-coding	2340.54	-0.0941195	0.141765	-0.663913	0.506746	0.999987	7132	TNFRSF1A
TWF2|A6RP|A6r|MSTP011|PTK9L|-|3p21.2|protein-coding	1514.74	-0.129945	0.128947	-1.00774	0.31358	0.999987	11344	TWF2
FBXO6|FBG2|FBS2|FBX6|Fbx6b|-|1p36.22|protein-coding	77.2391	-0.362425	0.3997	-0.906742	0.364543	0.999987	26270	FBXO6
GREB1L|C18orf6|KIAA1772|-|18q11.1-q11.2|protein-coding	325.231	-0.510259	0.535299	-0.953223	0.340477	0.999987	80000	GREB1L
IFIT1|C56|G10P1|IFI-56|IFI-56K|IFI56|IFIT-1|IFNAI1|ISG56|P56|RNM561|-|10q23.31|protein-coding	71.7363	0.560416	0.463157	1.20999	0.226282	0.999987	3434	IFIT1
NEURL3|LINCR|-|2q11.2|protein-coding	4.00755	0.0377755	0.984426	0.0383731	0.96939	0.999987	93082	NEURL3
PRH2|PRP-1/PRP-2|Pr|pr1/Pr2|-|12p13.2|protein-coding	0.633948	0.0687852	3.81102	0.018049	0.9856	0.999987	5555	PRH2
CLCN7|CLC-7|CLC7|OPTA2|OPTB4|PPP1R63|-|16p13.3|protein-coding	871.85	-0.133952	0.137153	-0.976657	0.328739	0.999987	1186	CLCN7
UBXN2A|UBXD4|-|2p23.3|protein-coding	431.171	0.114165	0.130686	0.873578	0.382348	0.999987	165324	UBXN2A
KLRA1P|KLRA1|KLRAP1|LY49L|Ly-49L|Ly49|-|12p13.2|pseudo	33.7703	0.319116	0.416831	0.765577	0.443928	0.999987	10748	KLRA1P
CCDC181|C1orf114|-|1q24.2|protein-coding	3.637	0.0256543	1.14435	0.0224183	0.982114	0.999987	57821	CCDC181
ADAMTS12|PRO4389|-|5p13.3-p13.2|protein-coding	576.13	-0.217194	0.329056	-0.660053	0.50922	0.999987	81792	ADAMTS12
FOXP1|12CC4|HSPC215|MFH|QRF1|hFKH1B|-|3p13|protein-coding	499.37	0.301873	0.213698	1.41261	0.15777	0.999987	27086	FOXP1
MOB3A|MOB-LAK|MOB1C|MOBKL2A|moblak|-|19p13.3|protein-coding	1682.55	-0.0183433	0.105452	-0.173949	0.861905	0.999987	126308	MOB3A
TUBA1A|B-ALPHA-1|LIS3|TUBA3|-|12q13.12|protein-coding	6926.15	-0.216287	0.187466	-1.15374	0.248607	0.999987	7846	TUBA1A
ACKR4|CC-CKR-11|CCBP2|CCR-11|CCR10|CCR11|CCRL1|CCX CKR|CCX-CKR|CKR-11|PPR1|VSHK1|-|3q22.1|protein-coding	318.243	-0.0749244	0.291866	-0.256708	0.797404	0.999987	51554	ACKR4
NOL12|Nop25|dJ37E16.7|-|22q13.1|protein-coding	386.164	0.0131376	0.132281	0.0993157	0.920888	0.999987	79159	NOL12
PILRA|FDF03|-|7q22.1|protein-coding	2.63173	1.12609	1.74673	0.644685	0.519131	0.999987	29992	PILRA
SP4|HF1B|SPR-1|-|7p15.3|protein-coding	87.0103	0.237593	0.263438	0.901896	0.367112	0.999987	6671	SP4
ATP8B5P|FetA|-|9p13.3|pseudo	2.43628	-0.173567	1.61444	-0.107509	0.914385	0.999987	158381	ATP8B5P
KAT6A|MOZ|MRD32|MYST-3|MYST3|RUNXBP2|ZC2HC6A|ZNF220|-|8p11.21|protein-coding	1414.47	0.0165516	0.102123	0.162075	0.871247	0.999987	7994	KAT6A
ZP2|ZPA|Zp-2|-|16p12.3-p12.2|protein-coding	0.33418	1.88175	4.03853	0.46595	0.641251	0.999987	7783	ZP2
NUP37|p37|-|12q23.2|protein-coding	837.16	0.1285	0.17948	0.715958	0.474017	0.999987	79023	NUP37
RNPEPL1|-|-|2q37.3|protein-coding	954.359	0.0514092	0.14152	0.363265	0.716407	0.999987	57140	RNPEPL1
RAI2|-|-|Xp22.13|protein-coding	1.32389	-1.59628	2.15621	-0.740318	0.459107	0.999987	10742	RAI2
NLGN4Y-AS1|NLGN4Y-AS|NLGN4YAS|-|Yq11.221|ncRNA	0.499101	-0.892205	4.03532	-0.221099	0.825015	0.999987	100874056	NLGN4Y-AS1
LINC00184|HANC|NCRNA00184|-|1q42.3|ncRNA	2.302	0.0260086	1.31232	0.0198187	0.984188	0.999987	100302691	LINC00184
DCUN1D5|SCCRO5|-|11q22.3|protein-coding	1150.62	0.213543	0.164346	1.29935	0.193824	0.999987	84259	DCUN1D5
PPFIA2|-|-|12q21.31|protein-coding	11.8335	-0.998107	1.24194	-0.803666	0.42159	0.999987	8499	PPFIA2
PPP5D1|-|-|19q13.32|protein-coding	3.94549	-1.56256	1.14052	-1.37005	0.170672	0.999987	100506012	PPP5D1
PLCL1|PLCE|PLCL|PLDL1|PPP1R127|PRIP|-|2q33.1|protein-coding	155.707	0.224054	0.438781	0.510627	0.609612	0.999987	5334	PLCL1
ASIC1|ACCN2|ASIC|BNaC2|-|12q13.12|protein-coding	42.3547	0.438336	0.455989	0.961286	0.336408	0.999987	41	ASIC1
SETDB2|C13orf4|CLLD8|CLLL8|KMT1F|-|13q14.2|protein-coding	295.134	-0.00535955	0.177482	-0.0301977	0.975909	0.999987	83852	SETDB2
MED30|MED30S|THRAP6|TRAP25|-|8q24.11|protein-coding	167.544	0.166581	0.22768	0.731646	0.464385	0.999987	90390	MED30
PRPH|NEF4|PRPH1|-|12q13.12|protein-coding	0.337741	1.89482	4.03736	0.469322	0.63884	0.999987	5630	PRPH
MTIF2|-|-|2p16.1|protein-coding	848.764	0.169369	0.155968	1.08592	0.277514	0.999987	4528	MTIF2
C19orf38|HIDE1|-|19p13.2|protein-coding	0.651382	-2.81206	3.62646	-0.775429	0.438086	0.999987	255809	C19orf38
MAPK7|BMK1|ERK4|ERK5|PRKM7|-|17p11.2|protein-coding	323.752	0.133025	0.173824	0.765283	0.444103	0.999987	5598	MAPK7
FCN3|FCNH|HAKA1|-|1p36.11|protein-coding	2.32884	-0.810856	1.28873	-0.629192	0.529224	0.999987	8547	FCN3
RAB30|-|-|11q14.1|protein-coding	264.073	-0.571444	0.28857	-1.98026	0.0476739	0.999987	27314	RAB30
ZNF174|ZSCAN8|-|16p13.3|protein-coding	158.85	-0.0844034	0.209263	-0.403336	0.686701	0.999987	7727	ZNF174
CLSTN1|ALC-ALPHA|CDHR12|CST-1|CSTN1|PIK3CD|XB31alpha|alcalpha1|alcalpha2|-|1p36.22|protein-coding	4087.22	-0.0966192	0.17969	-0.5377	0.590784	0.999987	22883	CLSTN1
NPY1R|NPY1-R|NPYR|-|4q32.2|protein-coding	0.518483	0.978964	4.03333	0.242718	0.808224	0.999987	4886	NPY1R
SMARCAL1|HARP|HHARP|-|2q35|protein-coding	692.102	-0.0326072	0.166563	-0.195765	0.844794	0.999987	50485	SMARCAL1
NOB1|ART-4|MST158|MSTP158|NOB1P|PSMD8BP1|-|16q22.1|protein-coding	1089.72	0.0490669	0.129885	0.377771	0.705601	0.999987	28987	NOB1
RRNAD1|C1orf66|CGI-41|METTL25B|-|1q23.1|protein-coding	161.553	0.0217939	0.194055	0.112308	0.910579	0.999987	51093	RRNAD1
CRIP2|CRIP|CRP2|ESP1|-|14q32.33|protein-coding	1036.42	-0.223547	0.241815	-0.924458	0.355248	0.999987	1397	CRIP2
SP1|-|-|12q13.13|protein-coding	1720.51	-0.0111938	0.106587	-0.105021	0.916359	0.999987	6667	SP1
MRGPRX2|MGRG3|MRGX2|-|11p15.1|protein-coding	0.338427	0.0322791	4.08047	0.00791063	0.993688	0.999987	117194	MRGPRX2
THAP3|-|-|1p36.31|protein-coding	184.081	0.0269054	0.198542	0.135515	0.892205	0.999987	90326	THAP3
CCDC144CP|CCDC144C|-|17p11.2|pseudo	0.997612	1.03957	2.01419	0.51612	0.605771	0.999987	348254	CCDC144CP
TPD52|D52|N8L|PC-1|PrLZ|hD52|-|8q21.13|protein-coding	1.13879	1.32283	2.73341	0.48395	0.628421	0.999987	7163	TPD52
LOC91450|-|-|15q24.3|ncRNA	1.48707	-0.29297	1.56305	-0.187435	0.851319	0.999987	91450	LOC91450
CSTA|AREI|PSS4|STF1|STFA|-|3q21.1|protein-coding	2.22866	-1.80151	1.96327	-0.917607	0.358825	0.999987	1475	CSTA
PELI3|-|-|11q13.2|protein-coding	78.9178	-0.0190173	0.279258	-0.0680992	0.945707	0.999987	246330	PELI3
CFAP46|C10orf123|C10orf124|C10orf92|C10orf93|TTC40|bA288G11.4|bA288G11.5|bB137A17.2|bB137A17.3|-|10q26.3|protein-coding	2.44293	-0.141918	1.56371	-0.0907572	0.927686	0.999987	54777	CFAP46
MIR4514|-|-|15q25.1|ncRNA	0.525363	2.52796	3.99146	0.633341	0.526511	0.999987	100616181	MIR4514
NMD3|CGI-07|-|3q26.1|protein-coding	1480.98	-0.0248023	0.107914	-0.229834	0.818221	0.999987	51068	NMD3
ZNF511|-|-|10q26.3|protein-coding	290.612	0.0234313	0.167361	0.140004	0.888657	0.999987	118472	ZNF511
ZNF236|ZNF236A|ZNF236B|-|18q23|protein-coding	248.901	0.0256556	0.161461	0.158896	0.87375	0.999987	7776	ZNF236
SNORA44|ACA44|-|1p35.3|snoRNA	10.1283	0.866135	0.767725	1.12818	0.259242	0.999987	677825	SNORA44
OSBPL10|ORP10|OSBP9|-|3p23|protein-coding	892.672	-0.306798	0.162891	-1.88345	0.0596388	0.999987	114884	OSBPL10
ADSS|ADEH|ADSS 2|-|1q44|protein-coding	1977.05	0.0372097	0.102072	0.364544	0.715451	0.999987	159	ADSS
G3BP1|G3BP|HDH-VIII|-|5q33.1|protein-coding	4252.44	0.0555092	0.0875814	0.633801	0.526211	0.999987	10146	G3BP1
LARS2|HLASA|LEURS|PRLTS4|mtLeuRS|-|3p21.31|protein-coding	760.931	0.170054	0.140507	1.21029	0.226168	0.999987	23395	LARS2
SLC25A42|-|-|19p13.11|protein-coding	167.851	-0.305255	0.242398	-1.25931	0.207918	0.999987	284439	SLC25A42
SMPD2|ISC1|NSMASE|NSMASE1|-|6q21|protein-coding	92.0841	0.165413	0.242539	0.682007	0.495235	0.999987	6610	SMPD2
MB21D1|C6orf150|cGAS|h-cGAS|-|6q13|protein-coding	124.77	0.388018	0.222083	1.74718	0.0806062	0.999987	115004	MB21D1
API5|AAC-11|AAC11|-|11p12|protein-coding	2160.03	0.085606	0.12033	0.711425	0.476821	0.999987	8539	API5
MRAP2|C6orf117|bA51G5.2|-|6q14.2|protein-coding	2.62584	-0.319855	1.50894	-0.211974	0.832127	0.999987	112609	MRAP2
SLC39A4|AEZ|AWMS2|ZIP4|-|8q24.3|protein-coding	41.5534	-0.277151	0.418744	-0.661862	0.508059	0.999987	55630	SLC39A4
LINC00515|C21orf71|PRED21|-|21q21.3|ncRNA	0.824792	-1.87071	2.36729	-0.790232	0.429392	0.999987	282566	LINC00515
RPRD2|HSPC099|KIAA0460|-|1q21.2|protein-coding	864.72	0.080829	0.108191	0.747094	0.455007	0.999987	23248	RPRD2
FAT2|CDHF8|CDHR9|HFAT2|MEGF1|-|5q33.1|protein-coding	0.335331	0.0322791	4.08047	0.00791063	0.993688	0.999987	2196	FAT2
TIMM22|TEX4|TIM22|-|17p13.3|protein-coding	727.697	-0.00809829	0.116051	-0.0697819	0.944367	0.999987	29928	TIMM22
RPS6KA6|PP90RSK4|RSK-4|RSK4|S6K-alpha-6|p90RSK6|-|Xq21.1|protein-coding	31.4349	-0.96464	0.522852	-1.84496	0.0650437	0.999987	27330	RPS6KA6
FIG4|ALS11|BTOP|CMT4J|KIAA0274|SAC3|YVS|dJ249I4.1|-|6q21|protein-coding	394.339	0.000347052	0.139564	0.0024867	0.998016	0.999987	9896	FIG4
PLGRKT|AD025|C9orf46|MDS030|PLG-RKT|Plg-R(KT)|-|9p24.1|protein-coding	458.664	0.137185	0.195214	0.702741	0.482217	0.999987	55848	PLGRKT
THOP1|EP24.15|MEPD_HUMAN|MP78|TOP|-|19p13.3|protein-coding	995.2	0.177692	0.171566	1.03571	0.300337	0.999987	7064	THOP1
MLKL|hMLKL|-|16q23.1|protein-coding	700.604	0.19841	0.151801	1.30704	0.191199	0.999987	197259	MLKL
TTK|CT96|ESK|MPH1|MPS1|MPS1L1|PYT|-|6q14.1|protein-coding	772.095	0.324403	0.239813	1.35274	0.17614	0.999987	7272	TTK
GRIK1|EAA3|EEA3|GLR5|GLUR5|GluK1|gluR-5|-|21q21.3|protein-coding	0.335331	0.0322791	4.08047	0.00791063	0.993688	0.999987	2897	GRIK1
CDH23|CDHR23|USH1D|-|10q22.1|protein-coding	0.342211	1.91147	4.03588	0.473618	0.635773	0.999987	64072	CDH23
CISH|BACTS2|CIS|CIS-1|G18|SOCS|-|3p21.2|protein-coding	3.10086	-0.41468	1.28174	-0.32353	0.746294	0.999987	1154	CISH
TCF25|FKSG26|Hulp1|NULP1|PRO2620|hKIAA1049|-|16q24.3|protein-coding	1463.81	-0.0179979	0.105916	-0.169926	0.865069	0.999987	22980	TCF25
KCNJ8|KIR6.1|uKATP-1|-|12p12.1|protein-coding	7.67961	-0.0335604	0.976324	-0.0343742	0.972579	0.999987	3764	KCNJ8
LMO2|RBTN2|RBTNL1|RHOM2|TTG2|-|11p13|protein-coding	118.693	-0.446373	0.341301	-1.30786	0.190921	0.999987	4005	LMO2
RARA-AS1|-|-|17q21.2|ncRNA	9.46561	0.382383	0.702299	0.544473	0.586116	0.999987	101929693	RARA-AS1
FUT3|CD174|FT3B|FucT-III|LE|Les|-|19p13.3|protein-coding	0.976611	-0.910225	2.32579	-0.391361	0.695531	0.999987	2525	FUT3
TBC1D12|-|-|10q23.33|protein-coding	284.11	-0.0112599	0.173174	-0.0650204	0.948158	0.999987	23232	TBC1D12
WDR20|DMR|-|14q32.31|protein-coding	474.246	0.0076928	0.148961	0.0516429	0.958813	0.999987	91833	WDR20
PAXBP1|BM020|C21orf66|FSAP105|GCFC|GCFC1|-|21q22.11|protein-coding	535.163	0.239532	0.162479	1.47424	0.140418	0.999987	94104	PAXBP1
HCG23|dJ1077I5.3|-|6p21.32|ncRNA	1.16839	-0.439164	2.2054	-0.199131	0.84216	0.999987	414764	HCG23
COQ4|CGI-92|COQ10D7|-|9q34.11|protein-coding	360.099	0.111269	0.145573	0.764354	0.444656	0.999987	51117	COQ4
LINC01013|-|-|6q23.2|ncRNA	3.80214	-0.583353	1.15731	-0.504057	0.614221	0.999987	100507254	LINC01013
CORO7-PAM16|-|-|16p13.3|protein-coding	483.897	-8.96771e-05	0.152836	-0.000586754	0.999532	0.999987	100529144	CORO7-PAM16
CNKSR3|MAGI1|-|6q25.2|protein-coding	201.837	-0.16073	0.255043	-0.630206	0.52856	0.999987	154043	CNKSR3
KCP|CRIM2|KCP1|NET67|-|7q32.1|protein-coding	1.13637	0.46025	2.15363	0.213709	0.830774	0.999987	375616	KCP
SNORD45B|RNU45B|U45b|-|1p31.1|snoRNA	20.2266	0.100251	0.614816	0.163059	0.870472	0.999987	26804	SNORD45B
SORBS3|SCAM-1|SCAM1|SH3D4|-|8p21.3|protein-coding	2089.37	0.0247507	0.133556	0.185321	0.852977	0.999987	10174	SORBS3
CHRAC1|CHARC1|CHARC15|CHRAC-1|CHRAC-15|CHRAC15|YCL1|-|8q24.3|protein-coding	546.833	0.134862	0.210933	0.639361	0.522588	0.999987	54108	CHRAC1
ZNF428|C19orf37|Zfp428|-|19q13.31|protein-coding	316.499	-0.0323526	0.165674	-0.195279	0.845175	0.999987	126299	ZNF428
GAP43|B-50|PP46|-|3q13.31|protein-coding	0.338427	0.0322791	4.08047	0.00791063	0.993688	0.999987	2596	GAP43
PRPF4B|PR4H|PRP4|PRP4H|PRP4K|dJ1013A10.1|-|6p25.2|protein-coding	1987.71	0.0926481	0.117165	0.790752	0.429089	0.999987	8899	PRPF4B
IL7R|CD127|CDW127|IL-7R-alpha|IL7RA|ILRA|-|5p13.2|protein-coding	625.453	-0.247303	0.446239	-0.554194	0.579446	0.999987	3575	IL7R
AFAP1-AS1|AFAP1-AS|AFAP1AS|-|4p16.1|ncRNA	0.503571	-0.892205	4.03532	-0.221099	0.825015	0.999987	84740	AFAP1-AS1
RNF169|-|-|11q13.4|protein-coding	884.363	0.133666	0.14267	0.936883	0.348819	0.999987	254225	RNF169
APOBR|APOB100R|APOB48R|-|16p12.1|protein-coding	67.0735	-1.90852	0.783965	-2.43445	0.0149144	0.999987	55911	APOBR
PLOD1|EDS6|LH|LH1|LLH|PLOD|-|1p36.22|protein-coding	7227	-0.203015	0.217636	-0.932823	0.350911	0.999987	5351	PLOD1
SLC25A16|D10S105E|GDA|GDC|HGT.1|ML7|hML7|-|10q21.3|protein-coding	390.539	0.0489875	0.194178	0.252282	0.800823	0.999987	8034	SLC25A16
CTSO|CTSO1|-|4q32.1|protein-coding	381.694	-0.0738493	0.29547	-0.249938	0.802635	0.999987	1519	CTSO
AKT2|HIHGHH|PKBB|PKBBETA|PRKBB|RAC-BETA|-|19q13.2|protein-coding	2033.73	0.0222172	0.130065	0.170817	0.864368	0.999987	208	AKT2
C6orf203|HSPC230|PRED31|-|6q21|protein-coding	273.264	0.117215	0.152881	0.766708	0.443255	0.999987	51250	C6orf203
BCL2L1|BCL-XL/S|BCL2L|BCLX|Bcl-X|PPP1R52|-|20q11.21|protein-coding	6745.74	0.0225543	0.168493	0.133859	0.893514	0.999987	598	BCL2L1
HAUS6|Dgt6|FAM29A|-|9p22.1|protein-coding	673.328	0.268168	0.219531	1.22155	0.221879	0.999987	54801	HAUS6
PSORS1C1|C6orf16|SEEK1|-|6p21.33|protein-coding	9.0297	-0.187266	0.841312	-0.222588	0.823856	0.999987	170679	PSORS1C1
GOLGA8M|-|-|15q13.1|protein-coding	5.31683	0.103202	1.28864	0.0800863	0.936169	0.999987	653720	GOLGA8M
DPY19L3|-|-|19q13.11|protein-coding	1028.28	0.23429	0.20911	1.12041	0.262538	0.999987	147991	DPY19L3
ATP9A|ATPIIA|-|20q13.2|protein-coding	1611.94	-0.310983	0.278946	-1.11485	0.264915	0.999987	10079	ATP9A
ZNF121|D19S204|ZHC32|ZNF20|-|19p13.2|protein-coding	107.639	-0.167915	0.272825	-0.61547	0.538244	0.999987	7675	ZNF121
ZNF251|-|-|8q24.3|protein-coding	326.541	0.0296132	0.153234	0.193254	0.84676	0.999987	90987	ZNF251
PLA2G12A|GXII|PLA2G12|ROSSY|-|4q25|protein-coding	373.147	0.0483764	0.135472	0.357095	0.721021	0.999987	81579	PLA2G12A
VIM-AS1|-|-|10p13|ncRNA	78.5462	0.0646599	0.285662	0.226351	0.820928	0.999987	100507347	VIM-AS1
CCL3L1|464.2|D17S1718|G0S19-2|LD78|LD78-beta(1-70)|LD78BETA|MIP1AP|SCYA3L|SCYA3L1|-|17q21.1|protein-coding	0.630153	-1.36648	3.81909	-0.357802	0.720492	0.999987	6349	CCL3L1
PDZD4|LNX5|LU1|PDZK4|PDZRN4L|-|Xq28|protein-coding	1.1576	-0.416011	1.90123	-0.218812	0.826797	0.999987	57595	PDZD4
PTPRR|EC-PTP|PCPTP1|PTP-SL|PTPBR7|PTPRQ|-|12q15|protein-coding	11.7913	0.761964	0.720675	1.05729	0.290378	0.999987	5801	PTPRR
ABLIM1|ABLIM|LIMAB1|LIMATIN|abLIM-1|-|10q25.3|protein-coding	14.4824	0.205519	0.594786	0.345535	0.729693	0.999987	3983	ABLIM1
KIRREL2|FILTRIN|NEPH3|NLG1|-|19q13.12|protein-coding	0.997503	-2.19671	2.27973	-0.963585	0.335254	0.999987	84063	KIRREL2
CNP|CNP1|-|17q21.2|protein-coding	1585.35	0.0409535	0.112844	0.36292	0.716665	0.999987	1267	CNP
PSTPIP1|CD2BP1|CD2BP1L|CD2BP1S|H-PIP|PAPAS|PSTPIP|-|15q24.3|protein-coding	181.174	-0.101656	0.255209	-0.398324	0.690391	0.999987	9051	PSTPIP1
CEBPB|C/EBP-beta|IL6DBP|NF-IL6|TCF5|-|20q13.13|protein-coding	331.603	-0.141762	0.17891	-0.792363	0.428149	0.999987	1051	CEBPB
ZNF546|ZNF49|-|19q13.2|protein-coding	44.2765	0.121171	0.364917	0.33205	0.739851	0.999987	339327	ZNF546
IGFL3|UNQ483|-|19q13.32|protein-coding	0.343362	0.0322791	4.08047	0.00791063	0.993688	0.999987	388555	IGFL3
LINC00547|-|-|13q13.3|ncRNA	11.3332	-2.37738	1.31072	-1.81379	0.0697095	0.999987	400121	LINC00547
CCDC151|CILD30|-|19p13.2|protein-coding	1.82734	-1.40716	1.63064	-0.86295	0.388165	0.999987	115948	CCDC151
PHF5A|INI|Rds3|SAP14b|SF3B7|SF3b14b|bK223H9.2|-|22q13.2|protein-coding	781.715	0.0915922	0.134572	0.680617	0.496114	0.999987	84844	PHF5A
AURKAPS1|AurAps1|STK6P|-|1q41|pseudo	18.4861	-0.365435	0.504681	-0.724091	0.46901	0.999987	6791	AURKAPS1
LINC01521|-|-|22q12.2|ncRNA	24.529	-0.0404442	0.470422	-0.0859743	0.931487	0.999987	54944	LINC01521
ALYREF|ALY|ALY/REF|BEF|REF|THOC4|-|17q25.3|protein-coding	1381.03	0.109035	0.163263	0.667848	0.504231	0.999987	10189	ALYREF
SNORD43|RNU43|U43|-|22q13.1|snoRNA	1.80118	0.315735	1.62329	0.194503	0.845782	0.999987	26807	SNORD43
DPH6|ATPBD4|-|15q14|protein-coding	118.887	0.0774906	0.274457	0.282342	0.777681	0.999987	89978	DPH6
SNORD24|RNU24|U24|-|9q34.2|snoRNA	3.2692	0.945393	1.32885	0.711439	0.476812	0.999987	26820	SNORD24
BRD2|D6S113E|FSH|FSRG1|NAT|O27.1.1|RING3|RNF3|-|6p21.32|protein-coding	3818.75	0.0769557	0.106401	0.723261	0.46952	0.999987	6046	BRD2
CHRD|-|-|3q27.1|protein-coding	4.01169	-0.483653	1.14926	-0.420837	0.673874	0.999987	8646	CHRD
SNRPG|SMG|Sm-G|-|2p13.3|protein-coding	418.584	0.154455	0.183042	0.843822	0.398769	0.999987	6637	SNRPG
HAGLR|HOXD-AS1|Mdgt|-|2q31.1|ncRNA	269.327	-0.00719864	0.323792	-0.0222323	0.982263	0.999987	401022	HAGLR
LDOC1L|Mar6|Mart6|dJ1033E15.2|-|22q13.31|protein-coding	784.171	0.0423548	0.149861	0.282628	0.777462	0.999987	84247	LDOC1L
CDC37L1|CDC37B|HARC|-|9p24.1|protein-coding	415.378	-0.00913658	0.147904	-0.0617738	0.950743	0.999987	55664	CDC37L1
TMEM110-MUSTN1|-|-|3p21.1|protein-coding	186.612	-0.0570249	0.19058	-0.299217	0.764774	0.999987	100526772	TMEM110-MUSTN1
GLIPR1|CRISP7|GLIPR|RTVP1|-|12q21.2|protein-coding	3773.58	-0.123746	0.249067	-0.496837	0.619304	0.999987	11010	GLIPR1
SURF2|SURF-2|-|9q34.2|protein-coding	167.987	0.0440941	0.179213	0.246043	0.805649	0.999987	6835	SURF2
SNX29P2|RUNDC2C|-|16p11.2|pseudo	0.835457	0.653434	2.40183	0.272057	0.785578	0.999987	440352	SNX29P2
DNAJC27-AS1|-|-|2p23.3|ncRNA	2.17459	0.715531	1.48851	0.480703	0.630728	0.999987	729723	DNAJC27-AS1
ELOVL2-AS1|-|-|6p24.2|ncRNA	0.339577	-1.86549	4.03431	-0.462406	0.64379	0.999987	100506409	ELOVL2-AS1
C1orf167|-|-|1p36.22|protein-coding	0.655625	1.50465	3.78606	0.397419	0.691058	0.999987	284498	C1orf167
SNORA5A|ACA5|ACA5A/B/C|-|7p13|snoRNA	1.64705	-1.18167	1.5262	-0.774255	0.43878	0.999987	654319	SNORA5A
HDAC2|HD2|RPD3|YAF1|-|6q21|protein-coding	2554.37	0.0211389	0.113524	0.186206	0.852283	0.999987	3066	HDAC2
SAPCD1-AS1|C6orf26-AS1|-|6p21.33|ncRNA	1.31079	0.0791008	2.14893	0.0368094	0.970637	0.999987	104413891	SAPCD1-AS1
TAS2R5|T2R5|-|7q34|protein-coding	3.54757	0.451324	1.17782	0.383185	0.701582	0.999987	54429	TAS2R5
TADA1|ADA1|HFI1|STAF42|TADA1L|hADA1|-|1q24.1|protein-coding	139.515	0.0987615	0.228336	0.432527	0.665358	0.999987	117143	TADA1
ZDHHC7|DHHC7|SERZ-B|SERZ1|ZNF370|-|16q24.1|protein-coding	1843.33	0.0249333	0.128255	0.194404	0.845859	0.999987	55625	ZDHHC7
CA11|CARPX1|-|19q13.33|protein-coding	1.84202	0.83069	1.4435	0.57547	0.564974	0.999987	770	CA11
MEX3C|BM-013|MEX-3C|RKHD2|RNF194|-|18q21.2|protein-coding	656.129	0.0718102	0.114886	0.625058	0.531933	0.999987	51320	MEX3C
OXCT2P1|OXCT2P|-|1p34.3|pseudo	11.3476	-1.14545	0.826513	-1.38588	0.165784	0.999987	192217	OXCT2P1
HOTAIRM1|HOXA-AS1|HOXA1-AS1|NCRNA00179|-|7p15.2|ncRNA	61.2373	-0.0739696	0.361666	-0.204524	0.837944	0.999987	100506311	HOTAIRM1
FANCL|FAAP43|PHF9|POG|-|2p16.1|protein-coding	197.763	0.163239	0.183837	0.887958	0.374563	0.999987	55120	FANCL
PPID|CYP-40|CYPD|-|4q32.1|protein-coding	1033.64	0.073549	0.12047	0.610516	0.54152	0.999987	5481	PPID
CPNE1|COPN1|CPN1|-|20q11.22|protein-coding	2511.89	-0.0899929	0.0840999	-1.07007	0.284587	0.999987	8904	CPNE1
EFEMP1|DHRD|DRAD|FBLN3|FBNL|FIBL-3|MLVT|MTLV|S1-5|-|2p16.1|protein-coding	1879.59	-2.32587	0.973661	-2.38879	0.0169042	0.999987	2202	EFEMP1
SAC3D1|HSU79266|SHD1|-|11q13.1|protein-coding	127.29	0.116579	0.277547	0.420033	0.674461	0.999987	29901	SAC3D1
ESYT2|CHR2SYT|E-Syt2|FAM62B|-|7q36.3|protein-coding	2530.71	0.192735	0.146255	1.31781	0.187569	0.999987	57488	ESYT2
ADAM17|ADAM18|CD156B|CSVP|NISBD|NISBD1|TACE|-|2p25.1|protein-coding	1251.05	-0.0628854	0.210077	-0.299344	0.764677	0.999987	6868	ADAM17
DCAF17|C2orf37|-|2q31.1|protein-coding	402.039	0.0307815	0.159479	0.193013	0.846949	0.999987	80067	DCAF17
RRP1|D21S2056E|NNP-1|NOP52|RRP1A|-|21q22.3|protein-coding	632.369	0.211546	0.192164	1.10086	0.270956	0.999987	8568	RRP1
CALR|CRT|HEL-S-99n|RO|SSA|cC1qR|-|19p13.13|protein-coding	31315	-0.126906	0.208212	-0.609502	0.542192	0.999987	811	CALR
MUC12|MUC-11|MUC-12|MUC11|-|7q22.1|protein-coding	1.17767	-0.39052	2.20492	-0.177113	0.859419	0.999987	10071	MUC12
LOC148709|-|-|1q32.1|pseudo	1.78327	-0.73882	1.56376	-0.472464	0.636596	0.999987	148709	LOC148709
CRY1|PHLL1|-|12q23.3|protein-coding	592.384	-0.0351336	0.156443	-0.224578	0.822308	0.999987	1407	CRY1
TCEANC|-|-|Xp22.2|protein-coding	29.817	-0.270438	0.404827	-0.668034	0.504112	0.999987	170082	TCEANC
LINC00877|-|-|3p13|ncRNA	0.809521	-1.81861	2.84038	-0.640271	0.521997	0.999987	285286	LINC00877
ZBTB47|ZNF651|-|3p22.1|protein-coding	597.668	-0.0740387	0.189505	-0.390696	0.696022	0.999987	92999	ZBTB47
NDST1-AS1|-|-|5q33.1|ncRNA	1.485	0.406986	2.04238	0.19927	0.842051	0.999987	102546298	NDST1-AS1
MIR1182|MIRN1182|hsa-mir-1182|-|1q42.2|ncRNA	3.45558	-0.100767	1.17015	-0.0861149	0.931375	0.999987	100302132	MIR1182
HIGD2A|RCF1b|-|5q35.2|protein-coding	704.854	-0.0320224	0.128148	-0.249885	0.802676	0.999987	192286	HIGD2A
HSD17B7|PRAP|SDR37C1|-|1q23.3|protein-coding	168.163	-0.228309	0.287219	-0.794895	0.426675	0.999987	51478	HSD17B7
USP21|USP16|USP23|-|1q23.3|protein-coding	243.578	0.0521443	0.156936	0.332264	0.73969	0.999987	27005	USP21
PIGT|CGI-06|MCAHS3|NDAP|PNH2|-|20q13.12|protein-coding	1778.81	0.0561728	0.145184	0.386907	0.698825	0.999987	51604	PIGT
UNC5B|UNC5H2|p53RDL1|-|10q22.1|protein-coding	169.279	-0.675821	0.345147	-1.95807	0.0502222	0.999987	219699	UNC5B
ZNF845|-|-|19q13.42|protein-coding	150.954	-0.0305538	0.223054	-0.136979	0.891047	0.999987	91664	ZNF845
SLCO2A1|MATR1|OATP2A1|PGT|PHOAR2|SLC21A2|-|3q22.1-q22.2|protein-coding	237.191	-0.662374	0.455242	-1.45499	0.145671	0.999987	6578	SLCO2A1
DIAPH3|AN|AUNA1|DIA2|DRF3|NSDAN|diap3|mDia2|-|13q21.2|protein-coding	1551.96	0.126498	0.173804	0.727817	0.466726	0.999987	81624	DIAPH3
TSC22D4|THG-1|THG1|TILZ2|-|7q22.1|protein-coding	903.824	-0.056435	0.165406	-0.341191	0.73296	0.999987	81628	TSC22D4
GNRHR2|GnRH-II-R|-|1q21.1|pseudo	3.01442	-0.301458	1.14746	-0.262719	0.792767	0.999987	114814	GNRHR2
MAP7|E-MAP-115|EMAP115|-|6q23.3|protein-coding	5.32924	-0.511224	0.990849	-0.515946	0.605892	0.999987	9053	MAP7
AHNAK2|C14orf78|-|14q32.33|protein-coding	3957.39	0.0859976	0.292601	0.293907	0.768829	0.999987	113146	AHNAK2
LOC100270804|-|-|20p11.23|ncRNA	10.1991	0.568107	0.686264	0.827825	0.40777	0.999987	100270804	LOC100270804
PLCG2|APLAID|FCAS3|PLC-IV|PLC-gamma-2|-|16q23.3|protein-coding	20.3998	-0.918199	0.566676	-1.62033	0.105162	0.999987	5336	PLCG2
TRIM44|AN3|DIPB|HSA249128|MC7|-|11p13|protein-coding	2818.08	0.0745638	0.127369	0.585416	0.558268	0.999987	54765	TRIM44
ITCH|ADMFD|AIF4|AIP4|NAPP1|-|20q11.22|protein-coding	1805.29	0.0136293	0.112291	0.121375	0.903394	0.999987	83737	ITCH
LRRK1|RIPK6|Roco1|-|15q26.3|protein-coding	577.738	0.0513627	0.166981	0.307597	0.758389	0.999987	79705	LRRK1
CARD14|BIMP2|CARMA2|PRP|PSORS2|PSS1|-|17q25.3|protein-coding	0.521579	0.978955	4.03088	0.242864	0.808111	0.999987	79092	CARD14
PITX1|BFT|CCF|LBNBG|POTX|PTX1|-|5q31.1|protein-coding	5.35597	0.764344	1.17904	0.648278	0.516805	0.999987	5307	PITX1
MMP2|CLG4|CLG4A|MMP-2|MMP-II|MONA|TBE-1|-|16q12.2|protein-coding	3498.92	-0.20451	0.377577	-0.541638	0.588068	0.999987	4313	MMP2
SH2D5|-|-|1p36.12|protein-coding	174.775	0.164831	0.367791	0.448166	0.654033	0.999987	400745	SH2D5
ABCA12|ARCI4A|ARCI4B|ICR2B|LI2|-|2q35|protein-coding	0.663432	0.0463204	2.55722	0.0181136	0.985548	0.999987	26154	ABCA12
SENCR|FLI1-AS1|lncRNA9|-|11q24.3|ncRNA	22.1994	-0.201498	0.537382	-0.374963	0.707688	0.999987	100507392	SENCR
VARS|G7A|VARS1|VARS2|-|6p21.33|protein-coding	2567.4	0.0385878	0.147764	0.261145	0.793981	0.999987	7407	VARS
LINC00649|-|-|21q22.11|ncRNA	1.44485	-0.965055	2.10322	-0.458846	0.646345	0.999987	100506334	LINC00649
CCDC88B|BRLZ|CCDC88|HKRP3|gipie|-|11q13.1|protein-coding	9.99621	-0.526746	0.799654	-0.658718	0.510077	0.999987	283234	CCDC88B
LOC728485|-|-|19q13.12|protein-coding	1.47193	-1.77948	1.76712	-1.007	0.313937	0.999987	728485	LOC728485
DPM2|CDG1U|-|9q34.11|protein-coding	617.414	0.0247772	0.121872	0.203305	0.838897	0.999987	8818	DPM2
SYTL5|slp5|-|Xp11.4|protein-coding	0.488535	0.919978	4.03853	0.2278	0.819801	0.999987	94122	SYTL5
TMEM158|BBP|RIS1|p40BBP|-|3p21.31|protein-coding	151.698	0.500796	0.438833	1.1412	0.253787	0.999987	25907	TMEM158
EMC2|KIAA0103|TTC35|-|8q23.1|protein-coding	621.531	0.00347406	0.120422	0.028849	0.976985	0.999987	9694	EMC2
TM7SF3|-|-|12p11.23|protein-coding	1201.38	0.0475063	0.173401	0.273968	0.784109	0.999987	51768	TM7SF3
CNNM1|ACDP1|CLP-1|-|10q24.2|protein-coding	40.7812	0.218886	0.582604	0.375703	0.707138	0.999987	26507	CNNM1
DIRAS1|Di-Ras1|GBTS1|RIG|-|19p13.3|protein-coding	33.827	-0.155023	0.708613	-0.21877	0.826829	0.999987	148252	DIRAS1
KCNMB4|-|-|12q15|protein-coding	4.83005	0.121482	0.908722	0.133684	0.893652	0.999987	27345	KCNMB4
KCNK6|K2p6.1|KCNK8|TOSS|TWIK-2|TWIK2|-|19q13.2|protein-coding	182.618	-0.467715	0.342975	-1.3637	0.172661	0.999987	9424	KCNK6
UBE2V2|DDVIT1|DDVit-1|EDAF-1|EDPF-1|EDPF1|MMS2|UEV-2|UEV2|-|8q11.21|protein-coding	1237.78	0.165598	0.163851	1.01066	0.31218	0.999987	7336	UBE2V2
LOC100507406|-|-|6q23.3|ncRNA	0.847505	0.578386	2.39831	0.241164	0.809428	0.999987	100507406	LOC100507406
RUNX1T1|AML1-MTG8|AML1T1|CBFA2T1|CDR|ETO|MTG8|ZMYND2|-|8q21.3|protein-coding	206.713	0.128571	0.263846	0.487296	0.626048	0.999987	862	RUNX1T1
NBAS|ILFS2|NAG|SOPH|-|2p24.3|protein-coding	1357.6	-0.0616394	0.116125	-0.530801	0.595557	0.999987	51594	NBAS
LINC01635|-|-|1p36.12|ncRNA	1.81942	1.46423	1.60318	0.913333	0.361068	0.999987	101928043	LINC01635
PDE4A|DPDE2|PDE4|PDE46|-|19p13.2|protein-coding	349.668	-0.0145348	0.160434	-0.0905969	0.927813	0.999987	5141	PDE4A
NNAT|Peg5|-|20q11.23|protein-coding	2.50717	-0.51733	1.81976	-0.284285	0.776192	0.999987	4826	NNAT
LOC100287015|-|-|8p23.1|ncRNA	21.4788	0.799307	0.526464	1.51826	0.12895	0.999987	100287015	LOC100287015
ZC2HC1C|C14orf140|FAM164C|-|14q24.3|protein-coding	8.18724	-0.136001	0.785325	-0.173178	0.862512	0.999987	79696	ZC2HC1C
PTPRN2|IA-2beta|IAR|ICAAR|PTPRP|R-PTP-N2|-|7q36.3|protein-coding	16.3694	-0.667326	0.764702	-0.872662	0.382848	0.999987	5799	PTPRN2
KCNIP2|KCHIP2|-|10q24.32|protein-coding	5.74282	-0.113163	1.09748	-0.103112	0.917874	0.999987	30819	KCNIP2
CLHC1|C2orf63|-|2p16.1|protein-coding	73.7745	0.268979	0.344403	0.781	0.434803	0.999987	130162	CLHC1
PPAN|BXDC3|SSF|SSF-1|SSF1|SSF2|-|19p13.2|protein-coding	477.941	0.129155	0.180232	0.716605	0.473618	0.999987	56342	PPAN
ZNF517|-|-|8q24.3|protein-coding	31.1048	0.510656	0.443188	1.15223	0.249226	0.999987	340385	ZNF517
PDPN|AGGRUS|GP36|GP40|Gp38|HT1A-1|OTS8|PA2.26|T1A|T1A-2|T1A2|TI1A|-|1p36.21|protein-coding	2.18584	-0.210335	1.35646	-0.155062	0.876773	0.999987	10630	PDPN
PAQR5|MPRG|-|15q23|protein-coding	70.6827	0.369061	0.618383	0.596816	0.55063	0.999987	54852	PAQR5
MIR7110|hsa-mir-7110|-|3q21.1|ncRNA	3.99035	0.765992	1.00868	0.759398	0.447615	0.999987	102465667	MIR7110
ELN|SVAS|WBS|WS|-|7q11.23|protein-coding	4.6828	-1.28212	1.16884	-1.09691	0.272679	0.999987	2006	ELN
BACH1|BACH-1|BTBD24|-|21q21.3|protein-coding	929.831	0.0229064	0.156786	0.1461	0.883843	0.999987	571	BACH1
SLC25A44|-|-|1q22|protein-coding	924.516	0.0375564	0.140412	0.267472	0.789106	0.999987	9673	SLC25A44
GLUD2|GDH2|GLUDP1|-|Xq24|protein-coding	30.1168	0.00255807	0.403926	0.00633301	0.994947	0.999987	2747	GLUD2
WFDC1|PS20|-|16q24.1|protein-coding	23.6451	-2.08325	1.07251	-1.94241	0.0520872	0.999987	58189	WFDC1
NLGN4X|ASPGX2|AUTSX2|HLNX|HNL4X|NLGN4|-|Xp22.32-p22.31|protein-coding	0.677318	0.00439641	2.55112	0.00172333	0.998625	0.999987	57502	NLGN4X
SH3GL1P1|CNSA-P1|SH3GLP1|-|17q11.2|pseudo	5.01194	-0.569781	0.940846	-0.605605	0.544777	0.999987	6458	SH3GL1P1
USF3|KIAA2018|-|3q13.2|protein-coding	476.303	-0.264117	0.126142	-2.0938	0.0362775	0.999987	205717	USF3
HIF1A-AS1|5'aHIF-1A|5'aHIF1alpha|-|14q23.2|ncRNA	7.16624	-0.452033	0.850283	-0.531627	0.594985	0.999987	100750246	HIF1A-AS1
BRSK1|hSAD1|-|19q13.42|protein-coding	20.992	-0.044049	0.732324	-0.0601496	0.952037	0.999987	84446	BRSK1
SFPQ|POMP100|PPP1R140|PSF|-|1p34.3|protein-coding	5029.64	0.217006	0.163073	1.33073	0.183278	0.999987	6421	SFPQ
DDR2|MIG20a|NTRKR3|TKT|TYRO10|-|1q23.3|protein-coding	2476.28	0.0505403	0.151851	0.332827	0.739265	0.999987	4921	DDR2
AMMECR1|AMMERC1|-|Xq23|protein-coding	456.331	0.270202	0.196738	1.37341	0.169625	0.999987	9949	AMMECR1
AP4S1|AP47B|CLA20|CLAPS4|CPSQ6|SPG52|-|14q12|protein-coding	116.157	0.0436821	0.213766	0.204345	0.838084	0.999987	11154	AP4S1
DNAJB11|ABBP-2|ABBP2|DJ9|Dj-9|EDJ|ERdj3|ERj3|ERj3p|PRO1080|UNQ537|-|3q27.3|protein-coding	2375.34	0.00943017	0.112426	0.083879	0.933153	0.999987	51726	DNAJB11
CADM1|BL2|IGSF4|IGSF4A|NECL2|Necl-2|RA175|ST17|SYNCAM|TSLC1|sTSLC-1|sgIGSF|synCAM1|-|11q23.3|protein-coding	2.9768	-1.37506	1.37321	-1.00135	0.316659	0.999987	23705	CADM1
RAB3D|D2-2|GOV|RAB16|RAD3D|-|19p13.2|protein-coding	171.713	-0.326959	0.343205	-0.952663	0.340761	0.999987	9545	RAB3D
TMEM133|AD031|-|11q22.1|protein-coding	35.9097	0.136974	0.40999	0.334091	0.738311	0.999987	83935	TMEM133
FNBP4|FBP30|-|11p11.2|protein-coding	1334.83	0.0124998	0.107877	0.115871	0.907755	0.999987	23360	FNBP4
EWSAT1|LINC00277|NCRNA00277|TMEM84|-|15q23|ncRNA	2.17034	0.324081	1.74343	0.185887	0.852534	0.999987	283673	EWSAT1
ST14|ARCI11|HAI|MT-SP1|MTSP1|PRSS14|SNC19|TADG15|TMPRSS14|-|11q24.3|protein-coding	0.339577	-1.86549	4.03431	-0.462406	0.64379	0.999987	6768	ST14
GXYLT2|GLT8D4|-|3p13|protein-coding	34.4316	0.0228024	0.441896	0.0516012	0.958846	0.999987	727936	GXYLT2
TMED4|ERS25|GMP25iso|HNLF|p24a3|p24alpha3|-|7p13|protein-coding	1279.65	0.122849	0.178105	0.689755	0.490348	0.999987	222068	TMED4
ARRB2|ARB2|ARR2|BARR2|-|17p13.2|protein-coding	603.859	0.0490079	0.124115	0.39486	0.692946	0.999987	409	ARRB2
EIF3CL|-|-|16p12.1|protein-coding	81.905	-0.587274	0.339875	-1.72791	0.084004	0.999987	728689	EIF3CL
MIR4707|mir-4707|-|14q11.2|ncRNA	2.66359	0.78527	1.22688	0.640055	0.522137	0.999987	100616424	MIR4707
TBC1D9B|GRAMD9B|-|5q35.3|protein-coding	3009.01	-0.0349858	0.107213	-0.326322	0.744181	0.999987	23061	TBC1D9B
PNPO|HEL-S-302|PDXPO|-|17q21.32|protein-coding	530.166	-0.288311	0.180237	-1.59962	0.109682	0.999987	55163	PNPO
PPP1R2P3|-|-|5q33.3|pseudo	1.16093	2.49359	2.21791	1.1243	0.260887	0.999987	153743	PPP1R2P3
SUMO4|IDDM5|SMT3H4|SUMO-4|dJ281H8.4|-|6q25.1|protein-coding	1.15495	-2.44947	2.10249	-1.16503	0.244005	0.999987	387082	SUMO4
OLFML1|UNQ564|-|11p15.4|protein-coding	2.33067	0.0311362	1.66294	0.0187236	0.985062	0.999987	283298	OLFML1
ZFYVE21|HCVP7TP1|ZF21|-|14q32.33|protein-coding	852.552	-0.144907	0.13953	-1.03854	0.299021	0.999987	79038	ZFYVE21
LOC101927752|-|-|8p23.3|ncRNA	126.149	0.109088	0.209119	0.521656	0.60191	0.999987	101927752	LOC101927752
CLDN20|-|-|6q25.3|protein-coding	0.968129	1.07417	2.67905	0.400951	0.688456	0.999987	49861	CLDN20
C1orf54|-|-|1q21.2|protein-coding	146.398	-0.112173	0.604035	-0.185705	0.852676	0.999987	79630	C1orf54
PMVK|HUMPMKI|PMK|PMKA|PMKASE|POROK1|-|1q21.3|protein-coding	497.103	0.0129338	0.120559	0.107282	0.914566	0.999987	10654	PMVK
MPP7|-|-|10p12.1|protein-coding	22.3437	-0.435617	0.671588	-0.648637	0.516573	0.999987	143098	MPP7
MBD6|-|-|12q13.3|protein-coding	418.383	0.036882	0.170463	0.216363	0.828705	0.999987	114785	MBD6
SPPL2B|IMP-4|IMP4|PSH4|PSL1|-|19p13.3|protein-coding	330.775	-0.108941	0.197131	-0.552631	0.580516	0.999987	56928	SPPL2B
RPL15|DBA12|EC45|L15|RPL10|RPLY10|RPYL10|-|3p24.2|protein-coding	7773.49	0.0542358	0.081525	0.665266	0.50588	0.999987	6138	RPL15
RPAP1|-|-|15q15.1|protein-coding	690.279	-0.111461	0.199287	-0.559302	0.575956	0.999987	26015	RPAP1
TRIM2|CMT2R|RNF86|-|4q31.3|protein-coding	1194.57	-0.0606586	0.194331	-0.31214	0.754934	0.999987	23321	TRIM2
GABARAP|ATG8A|GABARAP-a|MM46|-|17p13.1|protein-coding	2946.26	-0.107382	0.194824	-0.551175	0.581514	0.999987	11337	GABARAP
LINC00922|-|-|16q21|ncRNA	0.339577	-1.86549	4.03431	-0.462406	0.64379	0.999987	283867	LINC00922
KAZN|KAZ|-|1p36.21|protein-coding	221.694	-0.490949	0.200691	-2.4463	0.0144333	0.999987	23254	KAZN
ZNF430|-|-|19p12|protein-coding	202.776	0.131332	0.174416	0.752984	0.451459	0.999987	80264	ZNF430
FLNA|ABP-280|ABPX|CSBS|CVD1|FLN|FLN-A|FLN1|FMD|MNS|NHBP|OPD|OPD1|OPD2|XLVD|XMVD|-|Xq28|protein-coding	38897.8	-0.128209	0.102084	-1.25592	0.209146	0.999987	2316	FLNA
SP7|OI11|OI12|OSX|osterix|-|12q13.13|protein-coding	1.64992	0.622845	1.52038	0.409663	0.682053	0.999987	121340	SP7
PNPLA3|ADPN|C22orf20|iPLA(2)epsilon|-|22q13.31|protein-coding	382.395	-0.110594	0.169771	-0.651429	0.51477	0.999987	80339	PNPLA3
GPBAR1|BG37|GPCR19|GPR131|M-BAR|TGR5|-|2q35|protein-coding	2.00842	1.61767	1.43836	1.12467	0.26073	0.999987	151306	GPBAR1
HEXDC|-|-|17q25.3|protein-coding	59.1368	0.211525	0.311273	0.679549	0.49679	0.999987	284004	HEXDC
TNFAIP8L1|TIPE1|-|19p13.3|protein-coding	232.869	-0.140774	0.160822	-0.875342	0.381388	0.999987	126282	TNFAIP8L1
UBAP1|NAG20|UAP|UBAP|UBAP-1|-|9p13.3|protein-coding	934.051	-0.0291294	0.11157	-0.261087	0.794025	0.999987	51271	UBAP1
PARS2|MT-PRORS|proRS|-|1p32.3|protein-coding	68.7803	-0.112984	0.270775	-0.41726	0.676488	0.999987	25973	PARS2
P3H1|GROS1|LEPRE1|OI8|-|1p34.2|protein-coding	2776.25	-0.189964	0.202993	-0.935816	0.349368	0.999987	64175	P3H1
MKRN3|CPPB2|D15S9|RNF63|ZFP127|ZNF127|-|15q11.2|protein-coding	13.1854	0.383008	0.899804	0.425657	0.670357	0.999987	7681	MKRN3
THRB-AS1|-|-|3p24.2|ncRNA	0.337741	1.89482	4.03736	0.469322	0.63884	0.999987	644990	THRB-AS1
RABL2B|-|-|22q13.33|protein-coding	136.74	0.109581	0.197461	0.554948	0.57893	0.999987	11158	RABL2B
EMC3-AS1|-|-|3p25.3|ncRNA	97.2091	0.150612	0.288951	0.521237	0.602202	0.999987	442075	EMC3-AS1
TUB|RDOB|rd5|-|11p15.4|protein-coding	35.2201	-0.330648	0.751929	-0.439733	0.66013	0.999987	7275	TUB
MIS18A|B28|C21orf45|C21orf46|FASP1|MIS18alpha|hMis18alpha|-|21q22.11|protein-coding	399.213	0.373514	0.24112	1.54908	0.121362	0.999987	54069	MIS18A
TEN1-CDK3|C17orf106-CDK3|-|17q25.1|ncRNA	235.85	-0.202672	0.186085	-1.08913	0.276096	0.999987	100529145	TEN1-CDK3
CD79B|AGM6|B29|IGB|-|17q23.3|protein-coding	6.24298	-0.535403	1.03761	-0.515998	0.605856	0.999987	974	CD79B
SYBU|GOLSYN|OCSYN|SNPHL|-|8q23.2|protein-coding	9.38582	1.05097	0.929221	1.13102	0.258045	0.999987	55638	SYBU
WSB1|SWIP1|WSB-1|-|17q11.1|protein-coding	2308.34	-0.0441862	0.0960703	-0.459936	0.645562	0.999987	26118	WSB1
SLC9A8|NHE-8|NHE8|-|20q13.13|protein-coding	338.539	0.0372685	0.145652	0.255874	0.798048	0.999987	23315	SLC9A8
ANKRD6|-|-|6q15|protein-coding	12.6145	-0.103304	0.626537	-0.164881	0.869037	0.999987	22881	ANKRD6
TSSC1|EIPR1|-|2p25.3|protein-coding	602.296	0.0138533	0.111028	0.124773	0.900704	0.999987	7260	TSSC1
LOC101929064|-|-|4q21.3|ncRNA	1.82148	-0.202076	1.62705	-0.124198	0.901159	0.999987	101929064	LOC101929064
MDP1|FN6PASE|MDP-1|-|14q12|protein-coding	114.267	-0.180972	0.226201	-0.80005	0.423682	0.999987	145553	MDP1
TBC1D19|-|-|4p15.2|protein-coding	189.968	0.20085	0.211898	0.947865	0.343198	0.999987	55296	TBC1D19
HOXA-AS3|HOXA6as|-|7p15.2|ncRNA	1.38227	1.6276	2.22739	0.730718	0.464951	0.999987	100133311	HOXA-AS3
CHST11|C4ST|C4ST-1|C4ST1|HSA269537|-|12q23.3|protein-coding	366.255	-0.564422	0.374975	-1.50523	0.132266	0.999987	50515	CHST11
C11orf94|-|-|11p11.2|protein-coding	0.488535	0.919978	4.03853	0.2278	0.819801	0.999987	143678	C11orf94
LINC01358|-|-|1p32.1|ncRNA	4.8453	1.70513	1.01835	1.6744	0.0940525	0.999987	101926925	LINC01358
AASDHPPT|AASD-PPT|ACPS|CGI-80|LYS2|LYS5|-|11q22.3|protein-coding	908.534	0.0583232	0.122742	0.475168	0.634667	0.999987	60496	AASDHPPT
EGFL6|MAEG|W80|-|Xp22.2|protein-coding	1.29851	0.839862	3.23008	0.260013	0.794854	0.999987	25975	EGFL6
SHANK2|AUTS17|CORTBP1|CTTNBP1|ProSAP1|SHANK|SPANK-3|-|11q13.3-q13.4|protein-coding	2.0913	-0.619704	1.73088	-0.358028	0.720322	0.999987	22941	SHANK2
RBM5|G15|H37|LUCA15|RMB5|-|3p21.31|protein-coding	1927.84	-0.0166007	0.124355	-0.133494	0.893802	0.999987	10181	RBM5
NKAP|-|-|Xq24|protein-coding	364.699	0.0736769	0.143984	0.511701	0.608861	0.999987	79576	NKAP
CCDC149|-|-|4p15.2|protein-coding	254.368	-0.143642	0.225848	-0.636014	0.524767	0.999987	91050	CCDC149
ZBTB39|ZNF922|-|12q13.3|protein-coding	258.304	0.00801012	0.159948	0.0500796	0.960059	0.999987	9880	ZBTB39
USHBP1|AIEBP|MCC2|-|19p13.11|protein-coding	2.38356	0.467995	1.66351	0.28133	0.778458	0.999987	83878	USHBP1
THAP9-AS1|-|-|4q21.22|ncRNA	564.64	-0.12602	0.398329	-0.316372	0.75172	0.999987	100499177	THAP9-AS1
MCF2L|ARHGEF14|DBS|OST|-|13q34|protein-coding	12.5811	-1.2829	0.941138	-1.36313	0.172841	0.999987	23263	MCF2L
C1orf210|TEMP|-|1p34.2|protein-coding	0.500812	-0.85179	3.22804	-0.263873	0.791878	0.999987	149466	C1orf210
CDK16|PCTAIRE|PCTAIRE1|PCTGAIRE|PCTK1|-|Xp11.3|protein-coding	2211.59	-0.09408	0.146499	-0.642188	0.520751	0.999987	5127	CDK16
NSMCE3|HCA4|LICS|MAGEG1|MAGEL3|NDNL2|NSE3|-|15q13.1|protein-coding	350.631	-0.160767	0.150514	-1.06812	0.285466	0.999987	56160	NSMCE3
SIX5|BOR2|DMAHP|-|19q13.32|protein-coding	109.941	0.130859	0.26979	0.485041	0.627647	0.999987	147912	SIX5
LOC101927814|-|-|16p12.2|ncRNA	0.484064	0.9052	3.25639	0.277976	0.78103	0.999987	101927814	LOC101927814
SPATA18|Mieap|SPETEX1|-|4q12|protein-coding	172.474	-0.093789	0.232099	-0.404091	0.686146	0.999987	132671	SPATA18
SNORD116-22|HBII-85-22|-|15q11.2|snoRNA	0.669511	1.50467	3.7618	0.399986	0.689167	0.999987	100033433	SNORD116-22
BMS1P20|IGL|IGLV|IGLV1|-|22q11.22|pseudo	179.29	0.00479609	0.182911	0.0262209	0.979081	0.999987	96610	BMS1P20
YWHAB|GW128|HEL-S-1|HS1|KCIP-1|YWHAA|-|20q13.12|protein-coding	10701.7	0.0197763	0.079465	0.248868	0.803463	0.999987	7529	YWHAB
ZNF85|HPF4|HTF1|-|19p12|protein-coding	78.6134	-0.124092	0.352539	-0.351994	0.724843	0.999987	7639	ZNF85
HOXC10|HOX3I|-|12q13.13|protein-coding	264.715	-0.314743	0.336121	-0.936399	0.349068	0.999987	3226	HOXC10
KYAT3|CCBL2|KAT3|KATIII|-|1p22.2|protein-coding	1125.46	0.184109	0.128816	1.42924	0.152935	0.999987	56267	KYAT3
RAB8B|-|-|15q22.2|protein-coding	1286.8	0.0190268	0.10895	0.174637	0.861365	0.999987	51762	RAB8B
MORN4|C10orf83|bA548K23.4|rtp|-|10q24.2|protein-coding	158.754	-0.0406156	0.22206	-0.182904	0.854873	0.999987	118812	MORN4
SAMD13|HSD-41|HSD-42|-|1p31.1|protein-coding	11.1896	-0.91338	0.787119	-1.16041	0.245882	0.999987	148418	SAMD13
NMRAL1|HSCARG|SDR48A1|-|16p13.3|protein-coding	430.46	-0.261715	0.151636	-1.72595	0.084357	0.999987	57407	NMRAL1
MIR1254-1|MIR1254|MIRN1254|hsa-mir-1254|hsa-mir-1254-1|-|10q21.3|ncRNA	2.12079	-0.620524	1.58719	-0.390956	0.695829	0.999987	100302273	MIR1254-1
CNTNAP3P2|-|-|9q21.11|pseudo	0.335331	0.0322791	4.08047	0.00791063	0.993688	0.999987	643827	CNTNAP3P2
IGSF3|EWI-3|LCDD|V8|-|1p13.1|protein-coding	24.5535	0.484753	0.779512	0.621867	0.534029	0.999987	3321	IGSF3
TBC1D3I|-|-|17q12|protein-coding	4.32683	0.0127378	1.00305	0.0126991	0.989868	0.999987	102724862	TBC1D3I
ANK2|ANK-2|LQT4|brank-2|-|4q25-q26|protein-coding	115.733	0.213053	0.375831	0.566886	0.570792	0.999987	287	ANK2
TTC30B|IFT70|IFT70B|fleer|-|2q31.2|protein-coding	42.2102	0.180366	0.461115	0.391153	0.695684	0.999987	150737	TTC30B
POLR1E|PAF53|PRAF1|-|9p13.2|protein-coding	960.03	0.144723	0.228312	0.633884	0.526156	0.999987	64425	POLR1E
HEATR5A|C14orf125|-|14q12|protein-coding	1624.03	0.0783971	0.124033	0.632067	0.527343	0.999987	25938	HEATR5A
LOC100128885|-|-|7q11.21|ncRNA	0.496576	0.886025	4.04161	0.219226	0.826474	0.999987	100128885	LOC100128885
PFKL|ATP-PFK|PFK-B|PFK-L|-|21q22.3|protein-coding	2024.63	-0.0830035	0.123966	-0.669568	0.503133	0.999987	5211	PFKL
KCNH3|BEC1|ELK2|Kv12.2|-|12q13.12|protein-coding	0.488311	-0.851754	3.25051	-0.262037	0.793293	0.999987	23416	KCNH3
RBMX|HNRNPG|HNRPG|MRXS11|RBMXP1|RBMXRT|RNMX|hnRNP-G|-|Xq26.3|protein-coding	1574.47	0.117426	0.140283	0.837069	0.402554	0.999987	27316	RBMX
RP9|PAP-1|PAP1|-|7p14.3|protein-coding	166.557	-0.081484	0.225832	-0.360816	0.718237	0.999987	6100	RP9
CLCN6|CLC-6|-|1p36.22|protein-coding	620.669	0.11838	0.192773	0.614088	0.539157	0.999987	1185	CLCN6
NMNAT3|FKSG76|PNAT-3|PNAT3|-|3q23|protein-coding	0.819171	-0.585378	2.40753	-0.243145	0.807893	0.999987	349565	NMNAT3
ANKRD2|ARPP|-|10q24.2|protein-coding	12.9263	0.894563	0.732407	1.2214	0.221934	0.999987	26287	ANKRD2
CXCL2|CINC-2a|GRO2|GROb|MGSA-b|MIP-2a|MIP2|MIP2A|SCYB2|-|4q13.3|protein-coding	192.402	-0.117839	0.400239	-0.294421	0.768436	0.999987	2920	CXCL2
CTBS|CTB|-|1p22.3|protein-coding	365.644	0.121282	0.141456	0.857386	0.391232	0.999987	1486	CTBS
PALM3|-|-|19p13.12|protein-coding	1.80588	-1.39961	1.60698	-0.870962	0.383775	0.999987	342979	PALM3
DAB2IP|AF9Q34|AIP-1|AIP1|DIP1/2|-|9q33.2|protein-coding	464.757	-0.64825	0.255148	-2.54069	0.0110635	0.999987	153090	DAB2IP
TPD52L2|D54|TPD54|-|20q13.33|protein-coding	4225.34	-0.0737565	0.0988349	-0.74626	0.45551	0.999987	7165	TPD52L2
TMEM101|-|-|17q21.31|protein-coding	419.001	-0.0237325	0.155994	-0.152138	0.879078	0.999987	84336	TMEM101
TRAIP|RNF206|SCKL9|TRIP|-|3p21.31|protein-coding	159.694	0.19319	0.242252	0.797477	0.425174	0.999987	10293	TRAIP
CLIP1|CLIP|CLIP-170|CLIP170|CYLN1|RSN|-|12q24.31|protein-coding	2872.17	-0.121695	0.13991	-0.869809	0.384405	0.999987	6249	CLIP1
NPPB|BNP|-|1p36.22|protein-coding	2.46759	-0.966308	1.27934	-0.755318	0.450058	0.999987	4879	NPPB
WTH3DI|-|-|2q21.1|protein-coding	1.18399	-0.41482	1.90077	-0.218238	0.827244	0.999987	150786	WTH3DI
ADAM21|ADAM 21|ADAM31|-|14q24.2|protein-coding	7.70699	0.135049	0.828197	0.163063	0.870469	0.999987	8747	ADAM21
FBXO8|DC10|FBS|FBX8|-|4q34.1|protein-coding	375.563	0.0927377	0.138437	0.66989	0.502928	0.999987	26269	FBXO8
MPP6|PALS2|VAM-1|VAM1|p55T|-|7p15.3|protein-coding	321.232	0.271788	0.262687	1.03465	0.300834	0.999987	51678	MPP6
DMXL1|-|-|5q23.1|protein-coding	894.567	-0.0557901	0.111135	-0.502004	0.615665	0.999987	1657	DMXL1
LINC01272|-|-|20q13.13|protein-coding	1.83939	-0.254675	1.4477	-0.175917	0.860359	0.999987	100506115	LINC01272
CCM2L|C20orf160|dJ310O13.5|-|20q11.21|protein-coding	3.17289	-0.0833054	1.29673	-0.0642427	0.948777	0.999987	140706	CCM2L
LINC01686|-|-|1q25.3|ncRNA	0.834769	-0.556595	2.4031	-0.231615	0.816837	0.999987	284648	LINC01686
DISC1|C1orf136|SCZD9|-|1q42.2|protein-coding	229.437	-0.33929	0.29717	-1.14174	0.253564	0.999987	27185	DISC1
DPYSL2|CRMP-2|CRMP2|DHPRP2|DRP-2|DRP2|N2A3|ULIP-2|ULIP2|-|8p21.2|protein-coding	3297.76	-0.0953174	0.239327	-0.398274	0.690429	0.999987	1808	DPYSL2
LOXL4|LOXC|-|10q24.2|protein-coding	505.611	-0.519634	0.78468	-0.662224	0.507828	0.999987	84171	LOXL4
TMEM263|C12orf23|-|12q23.3|protein-coding	1711.7	0.0723315	0.138848	0.520942	0.602407	0.999987	90488	TMEM263
MIR1909|MIRN1909|hsa-mir-1909|mir-1909|-|19p13.3|ncRNA	6.80578	1.13095	0.876401	1.29045	0.196893	0.999987	100302210	MIR1909
ZCCHC12|PNMA7A|SIZN|SIZN1|-|Xq24|protein-coding	0.476949	-2.36579	3.99736	-0.591838	0.553959	0.999987	170261	ZCCHC12
SERPING1|C1IN|C1INH|C1NH|HAE1|HAE2|-|11q12.1|protein-coding	531.047	-0.500722	0.747078	-0.670241	0.502704	0.999987	710	SERPING1
NDC1|NET3|TMEM48|-|1p32.3|protein-coding	1149.88	0.280489	0.219665	1.27689	0.20164	0.999987	55706	NDC1
LOC101927377|-|-|20q13.12|ncRNA	0.343362	0.0322791	4.08047	0.00791063	0.993688	0.999987	101927377	LOC101927377
C12orf73|-|-|12q23.3|protein-coding	74.8952	-0.137014	0.309249	-0.443056	0.657726	0.999987	728568	C12orf73
AFAP1L2|CTB-1144G6.4|KIAA1914|XB130|-|10q25.3|protein-coding	14.9934	-1.53777	0.715886	-2.14807	0.0317083	0.999987	84632	AFAP1L2
PRTFDC1|HHGP|-|10p12.1|protein-coding	253.142	-0.056663	0.158849	-0.35671	0.721309	0.999987	56952	PRTFDC1
ZC3HC1|HSPC216|NIPA|-|7q32.2|protein-coding	581.901	-0.0216343	0.119395	-0.181199	0.856211	0.999987	51530	ZC3HC1
LOC646730|-|-|3q23|ncRNA	0.64645	0.106914	3.04157	0.035151	0.971959	0.999987	646730	LOC646730
PDPR|PDP3|-|16q22.1|protein-coding	1248.32	0.0242098	0.26706	0.0906528	0.927769	0.999987	55066	PDPR
NRROS|ELLP3030|GARPL1|LRRC33|UNQ3030|-|3q29|protein-coding	194.043	-0.0603261	0.294289	-0.204989	0.837581	0.999987	375387	NRROS
STX17-AS1|-|-|9q31.1|ncRNA	0.660336	0.055425	2.55866	0.0216617	0.982718	0.999987	441461	STX17-AS1
TCFL5|CHA|E2BP-1|Figlb|SOSF1|bHLHe82|-|20q13.33|protein-coding	272.3	0.227204	0.161601	1.40596	0.159736	0.999987	10732	TCFL5
PTPRCAP|CD45-AP|LPAP|-|11q13.2|protein-coding	5.76685	-0.0297857	0.886204	-0.0336104	0.973188	0.999987	5790	PTPRCAP
ZNF543|-|-|19q13.43|protein-coding	39.4845	0.00177788	0.405043	0.00438935	0.996498	0.999987	125919	ZNF543
GSDMB|GSDML|PP4052|PRO2521|-|17q21.1|protein-coding	38.4468	0.173895	0.401239	0.433395	0.664728	0.999987	55876	GSDMB
RFXANK|ANKRA1|BLS|F14150_1|RFX-B|-|19p13.11|protein-coding	530.477	-0.143638	0.118214	-1.21507	0.224341	0.999987	8625	RFXANK
TECR|GPSN2|MRT14|SC2|TER|-|19p13.12|protein-coding	385.262	0.086182	0.156232	0.551629	0.581202	0.999987	9524	TECR
FASTKD2|KIAA0971|-|2q33.3|protein-coding	1244.73	0.109896	0.116594	0.942555	0.345909	0.999987	22868	FASTKD2
XRCC6P5|-|-|Xq22.1|pseudo	1.35153	0.0627014	2.14884	0.0291791	0.976722	0.999987	442459	XRCC6P5
MC5R|MC2|-|18p11.21|protein-coding	1.01643	1.02311	2.2676	0.451184	0.651857	0.999987	4161	MC5R
DZANK1|ANKRD64|C20orf12|C20orf84|bA189K21.1|bA189K21.8|dJ568F9.2|-|20p11.23|protein-coding	44.3561	-0.0390065	0.348614	-0.11189	0.91091	0.999987	55184	DZANK1
PHACTR1|RPEL|RPEL1|dJ257A7.2|-|6p24.1|protein-coding	109.818	-0.402623	0.347289	-1.15933	0.246321	0.999987	221692	PHACTR1
ZBTB20|DPZF|HOF|ODA-8S|PRIMS|ZNF288|-|3q13.31|protein-coding	305.019	-0.00371527	0.222117	-0.0167266	0.986655	0.999987	26137	ZBTB20
VPS37C|-|-|11q12.2|protein-coding	425.619	-0.0395104	0.136853	-0.288706	0.772806	0.999987	55048	VPS37C
SSH2|SSH-2|SSH-2L|-|17q11.2|protein-coding	682.635	0.10675	0.184886	0.57738	0.563683	0.999987	85464	SSH2
NOL3|ARC|FCM|MYP|NOP|NOP30|-|16q22.1|protein-coding	241.229	-0.2537	0.250683	-1.01203	0.311522	0.999987	8996	NOL3
PRKCD|ALPS3|CVID9|MAY1|PKCD|nPKC-delta|-|3p21.1|protein-coding	1057.96	-0.107262	0.105144	-1.02015	0.307658	0.999987	5580	PRKCD
SP140L|-|-|2q37.1|protein-coding	486.198	-0.0195001	0.162858	-0.119737	0.904692	0.999987	93349	SP140L
E4F1|E4F|-|16p13.3|protein-coding	273.931	-0.0602483	0.178734	-0.337084	0.736054	0.999987	1877	E4F1
JMJD1C-AS1|-|-|10q21.3|ncRNA	6.20867	-0.0628284	0.859479	-0.0731005	0.941726	0.999987	84989	JMJD1C-AS1
POGLUT1|C3orf9|CLP46|KDELCL1|KTELC1|LGMD2Z|MDS010|MDSRP|Rumi|hCLP46|-|3q13.33|protein-coding	573.93	-0.198331	0.182219	-1.08842	0.276409	0.999987	56983	POGLUT1
PHYHIPL|-|-|10q21.1|protein-coding	0.651155	1.49455	2.99181	0.499547	0.617394	0.999987	84457	PHYHIPL
UCN|UI|UROC|-|2p23.3|protein-coding	1.66782	-0.544861	1.48568	-0.366741	0.713812	0.999987	7349	UCN
TRPM3|GON-2|LTRPC3|MLSN2|-|9q21.12-q21.13|protein-coding	2.32608	1.88553	1.96113	0.961447	0.336327	0.999987	80036	TRPM3
MORF4L2|MORFL2|MRGX|-|Xq22.2|protein-coding	9109.31	0.0663133	0.105512	0.62849	0.529683	0.999987	9643	MORF4L2
PSMC2|MSS1|Nbla10058|S7|-|7q22.1|protein-coding	2998.31	-0.0509813	0.0870467	-0.585678	0.558092	0.999987	5701	PSMC2
ENTPD3|CD39L3|HB6|NTPDase-3|-|3p22.1|protein-coding	6.49335	-4.17609	2.03365	-2.0535	0.0400245	0.999987	956	ENTPD3
NFKBIA|IKBA|MAD-3|NFKBI|-|14q13.2|protein-coding	969.564	0.0206453	0.213403	0.0967433	0.92293	0.999987	4792	NFKBIA
HDAC5|HD5|NY-CO-9|-|17q21.31|protein-coding	682.198	-0.321955	0.198794	-1.61954	0.105331	0.999987	10014	HDAC5
ACOD1|CAD|IRG1|-|13q22.3|protein-coding	0.338427	0.0322791	4.08047	0.00791063	0.993688	0.999987	730249	ACOD1
ZNF565|-|-|19q13.12|protein-coding	49.6766	0.0471445	0.309317	0.152415	0.87886	0.999987	147929	ZNF565
POLE3|CHARAC17|CHRAC17|YBL1|p17|-|9q32|protein-coding	1993.5	0.101353	0.15406	0.657883	0.510613	0.999987	54107	POLE3
LPAR3|EDG7|Edg-7|GPCR|HOFNH30|LP-A3|LPA3|RP4-678I3|-|1p22.3|protein-coding	12.3265	1.53067	0.966513	1.58371	0.11326	0.999987	23566	LPAR3
MINOS1P1|CG012|N4BP2L2-IT|N4BP2L2-IT1|N4BP2L2IT1|-|13q13.1|pseudo	0.510452	0.947767	3.21636	0.294671	0.768245	0.999987	100462953	MINOS1P1
NEPRO|C3orf17|NET17|-|3q13.2|protein-coding	826.777	0.0579173	0.135238	0.428264	0.668459	0.999987	25871	NEPRO
RBM3|IS1-RNPL|RNPL|-|Xp11.23|protein-coding	11221.6	0.0977533	0.123205	0.79342	0.427533	0.999987	5935	RBM3
KIF2C|CT139|KNSL6|MCAK|-|1p34.1|protein-coding	1240.58	0.190008	0.240799	0.789072	0.43007	0.999987	11004	KIF2C
RAET1K|-|-|6q25.1|pseudo	4.54473	0.595351	1.04517	0.569619	0.568936	0.999987	646024	RAET1K
TRIM45|RNF99|-|1p13.1|protein-coding	83.4165	0.0504536	0.329477	0.153132	0.878294	0.999987	80263	TRIM45
SPRYD7|C13orf1|CLLD6|-|13q14.2|protein-coding	450.019	-0.0103982	0.150482	-0.0690994	0.944911	0.999987	57213	SPRYD7
EIF3L|EIF3EIP|EIF3S11|EIF3S6IP|HSPC021|HSPC025|MSTP005|-|22q13.1|protein-coding	5744.75	-0.00743891	0.107055	-0.0694866	0.944602	0.999987	51386	EIF3L
NTRK2|GP145-TrkB|TRKB|trk-B|-|9q21.33|protein-coding	3.43245	1.27381	1.5542	0.819593	0.412448	0.999987	4915	NTRK2
LINC00941|-|-|12p11.21|ncRNA	79.6901	0.156228	0.306634	0.509493	0.610407	0.999987	100287314	LINC00941
CNOT10|-|-|3p22.3|protein-coding	438.271	0.122443	0.143107	0.855604	0.392217	0.999987	25904	CNOT10
EEF2K|HSU93850|eEF-2K|-|16p12.2|protein-coding	605.995	0.0680072	0.161488	0.42113	0.67366	0.999987	29904	EEF2K
PURG|PURG-A|PURG-B|-|8p12|protein-coding	0.342211	1.91147	4.03588	0.473618	0.635773	0.999987	29942	PURG
NHLH1|HEN1|NSCL|NSCL1|bHLHa35|-|1q23.2|protein-coding	1.15645	0.418241	2.15304	0.194256	0.845976	0.999987	4807	NHLH1
DKK2|DKK-2|-|4q25|protein-coding	5.62527	0.873112	1.04479	0.835681	0.403334	0.999987	27123	DKK2
CD2AP|CMS|-|6p12.3|protein-coding	862.011	0.0954595	0.152019	0.627947	0.530039	0.999987	23607	CD2AP
PPP2R2D|MDS026|-|10q26.3|protein-coding	616.973	-0.0592204	0.125288	-0.472674	0.636446	0.999987	55844	PPP2R2D
GABBR2|GABABR2|GPR51|GPRC3B|HG20|HRIHFB2099|-|9q22.33|protein-coding	1312.66	0.742216	0.696941	1.06496	0.286893	0.999987	9568	GABBR2
NEDD1|GCP-WD|TUBGCP7|-|12q23.1|protein-coding	701.044	0.192115	0.145393	1.32135	0.186386	0.999987	121441	NEDD1
LCORL|MLR1|-|4p15.31|protein-coding	146.426	0.202452	0.258119	0.784335	0.432844	0.999987	254251	LCORL
PAQR7|MPRA|PGLP|mSR|-|1p36.11|protein-coding	303.475	-0.252131	0.152605	-1.65219	0.0984967	0.999987	164091	PAQR7
ARSJ|-|-|4q26|protein-coding	1383.96	-0.204974	0.227485	-0.901047	0.367563	0.999987	79642	ARSJ
CLEC4A|CD367|CLECSF6|DCIR|DDB27|HDCGC13P|LLIR|-|12p13.31|protein-coding	5.30251	0.607173	1.04959	0.578484	0.562938	0.999987	50856	CLEC4A
SPAG8|BS-84|CILD28|CT142|HSD-1|SMP1|SPAG3|hSMP-1|-|9p13.3|protein-coding	6.80187	0.522535	0.827238	0.631662	0.527608	0.999987	26206	SPAG8
RFFL|CARP-2|CARP2|FRING|RIFIFYLIN|RNF189|RNF34L|-|17q12|protein-coding	382.389	0.155719	0.161846	0.962138	0.33598	0.999987	117584	RFFL
UNK|UNKEMPT|ZC3H5|ZC3HDC5|-|17q25.1|protein-coding	189.967	-0.0277896	0.209629	-0.132566	0.894537	0.999987	85451	UNK
STAT4|SLEB11|-|2q32.2-q32.3|protein-coding	49.5987	-0.461542	0.420062	-1.09875	0.271878	0.999987	6775	STAT4
KCTD16|-|-|5q31.3|protein-coding	4.18794	1.14478	1.05763	1.0824	0.279073	0.999987	57528	KCTD16
LIG4|LIG4S|-|13q33.3|protein-coding	520.585	0.0720189	0.1276	0.56441	0.572475	0.999987	3981	LIG4
EIF5B|IF2|-|2q11.2|protein-coding	5708.3	0.16752	0.120962	1.3849	0.166082	0.999987	9669	EIF5B
CWC22|EIF4GL|NCM|fSAPb|-|2q31.3|protein-coding	694.729	0.101996	0.154401	0.660589	0.508876	0.999987	57703	CWC22
LOC100505715|-|-|19q13.31|ncRNA	38.5085	-0.414896	0.345345	-1.2014	0.229597	0.999987	100505715	LOC100505715
BRF2|BRFU|TFIIIB50|-|8p11.23|protein-coding	297.085	0.0139092	0.170638	0.0815129	0.935034	0.999987	55290	BRF2
THCAT158|-|-|17q21.32|ncRNA	0.684199	1.53244	2.96024	0.517673	0.604686	0.999987	102724508	THCAT158
MCEE|GLOD2|-|2p13.3|protein-coding	95.191	0.202234	0.305286	0.66244	0.50769	0.999987	84693	MCEE
SKI|SGS|SKV|-|1p36.33-p36.32|protein-coding	1503.11	-0.0827274	0.138669	-0.596581	0.550787	0.999987	6497	SKI
LOC100131655|-|-|18q23|ncRNA	1.16677	-1.24585	2.14921	-0.579677	0.562133	0.999987	100131655	LOC100131655
PDGFB|IBGC5|PDGF-2|PDGF2|SIS|SSV|c-sis|-|22q13.1|protein-coding	408.191	-0.826751	0.491979	-1.68046	0.0928677	0.999987	5155	PDGFB
CYP11A1|CYP11A|CYPXIA1|P450SCC|-|15q24.1|protein-coding	5.87999	-0.407509	0.947762	-0.42997	0.667217	0.999987	1583	CYP11A1
DLK2|DLK-2|EGFL9|-|6p21.1|protein-coding	5.29278	-0.531366	0.978735	-0.542911	0.587191	0.999987	65989	DLK2
CTDSPL|C3orf8|HYA22|PSR1|RBSP3|SCP3|-|3p22.2|protein-coding	1018.99	-0.170868	0.156448	-1.09217	0.274758	0.999987	10217	CTDSPL
NRXN2|-|-|11q13.1|protein-coding	43.7289	0.31218	0.516812	0.60405	0.545811	0.999987	9379	NRXN2
ELOC|SIII|TCEB1|-|8q21.11|protein-coding	1130.16	0.0251898	0.126646	0.1989	0.842341	0.999987	6921	ELOC
RAD54B|RDH54|-|8q22.1|protein-coding	191.978	0.239836	0.275354	0.87101	0.383749	0.999987	25788	RAD54B
FANCF|FAF|-|11p14.3|protein-coding	97.7595	0.0582427	0.241377	0.241294	0.809328	0.999987	2188	FANCF
SNHG16|Nbla10727|Nbla12061|ncRAN|-|17q25.1|ncRNA	771.667	0.11733	0.242826	0.483184	0.628965	0.999987	100507246	SNHG16
NVL|NVL2|-|1q42.11|protein-coding	519.1	-0.0325376	0.121917	-0.266883	0.789559	0.999987	4931	NVL
TTC38|LL22NC03-5H6.5|-|22q13.31|protein-coding	496.023	-0.0775335	0.150915	-0.513757	0.607422	0.999987	55020	TTC38
LCA5|C6orf152|-|6q14.1|protein-coding	157.265	-0.18442	0.194156	-0.949857	0.342185	0.999987	167691	LCA5
BAAT|BACAT|BAT|-|9q31.1|protein-coding	2.5096	0.572379	1.51856	0.376923	0.706231	0.999987	570	BAAT
LOC286437|-|-|Xq22.2|ncRNA	41.398	0.111021	0.414649	0.267747	0.788894	0.999987	286437	LOC286437
FAM133B|-|-|7q21.2|protein-coding	46.4444	0.383018	0.38096	1.0054	0.314704	0.999987	257415	FAM133B
AGAP1-IT1|-|-|2q37.2|ncRNA	1.70373	1.23917	1.72509	0.718319	0.472561	0.999987	100506749	AGAP1-IT1
MFSD9|-|-|2q12.1|protein-coding	123.331	-0.12831	0.253052	-0.507049	0.61212	0.999987	84804	MFSD9
UBR2|C6orf133|bA49A4.1|dJ242G1.1|dJ392M17.3|-|6p21.1|protein-coding	1136.54	-0.0930531	0.119654	-0.777683	0.436756	0.999987	23304	UBR2
SUMO2|HSMT3|SMT3B|SMT3H2|SUMO3|Smt3A|-|17q25.1|protein-coding	950.811	0.131333	0.139171	0.943675	0.345336	0.999987	6613	SUMO2
PRKCDBP|CAVIN3|HSRBC|SRBC|cavin-3|-|11p15.4|protein-coding	788.708	0.344667	0.168725	2.04277	0.0410747	0.999987	112464	PRKCDBP
HIBCH|HIBYLCOAH|-|2q32.2|protein-coding	371.887	0.0004721	0.172592	0.00273535	0.997818	0.999987	26275	HIBCH
RPN2|RIBIIR|RPN-II|RPNII|SWP1|-|20q11.23|protein-coding	9626.55	-0.0662962	0.148378	-0.446806	0.655015	0.999987	6185	RPN2
ZZZ3|ATAC1|-|1p31.1|protein-coding	1390.66	0.139496	0.0991457	1.40698	0.159434	0.999987	26009	ZZZ3
C8orf33|-|-|8q24.3|protein-coding	947.527	0.192601	0.145815	1.32086	0.186549	0.999987	65265	C8orf33
ZNF621|-|-|3p22.1|protein-coding	732.398	-0.0541955	0.120284	-0.450562	0.652305	0.999987	285268	ZNF621
LINC01311|-|-|22q11.21|ncRNA	7.44974	0.202089	0.8561	0.236058	0.813388	0.999987	100652736	LINC01311
LDHD|DLD|-|16q23.1|protein-coding	3.63805	0.831421	1.10018	0.755716	0.44982	0.999987	197257	LDHD
GLRX|GRX|GRX1|-|5q15|protein-coding	2125.64	-0.216239	0.19338	-1.11821	0.263477	0.999987	2745	GLRX
NT5M|dNT-2|dNT2|mdN|-|17p11.2|protein-coding	16.1278	-0.249721	0.623368	-0.4006	0.688714	0.999987	56953	NT5M
DLG1|DLGH1|SAP-97|SAP97|dJ1061C18.1.1|hdlg|-|3q29|protein-coding	4055.17	-0.322008	0.23477	-1.37159	0.170192	0.999987	1739	DLG1
ZDHHC23|DHHC-23|NIDD|-|3q13.31|protein-coding	40.0559	0.30113	0.346086	0.870101	0.384245	0.999987	254887	ZDHHC23
RASGEF1A|CG4853|-|10q11.21|protein-coding	3.44619	0.994019	1.4703	0.676063	0.499	0.999987	221002	RASGEF1A
SLC25A35|-|-|17p13.1|protein-coding	42.1583	-0.302944	0.344282	-0.879931	0.378897	0.999987	399512	SLC25A35
POMZP3|POM-ZP3|POM121|-|7q11.23|protein-coding	53.2546	0.378546	0.476925	0.793723	0.427357	0.999987	22932	POMZP3
NBPF7|-|-|1p12|protein-coding	0.33418	1.88175	4.03853	0.46595	0.641251	0.999987	343505	NBPF7
DRICH1|C22orf43|KB-208E9.1|-|22q11.23|protein-coding	3.35249	0.65254	1.25221	0.521113	0.602288	0.999987	51233	DRICH1
CAPRIN2|C1QDC1|EEG-1|EEG1|RNG140|-|12p11.21|protein-coding	539.436	0.145914	0.179304	0.813779	0.415772	0.999987	65981	CAPRIN2
DMTN|DMT|EPB49|-|8p21.3|protein-coding	11.3822	-0.47659	0.708257	-0.672905	0.501008	0.999987	2039	DMTN
LINC01003|-|-|7q36.1|ncRNA	11.9224	-0.201172	0.608444	-0.330634	0.740921	0.999987	100128822	LINC01003
ARL3|ARFL3|-|10q24.32|protein-coding	672.301	-0.0476365	0.123816	-0.384736	0.700433	0.999987	403	ARL3
HOXB2|HOX2|HOX2H|Hox-2.8|K8|-|17q21.32|protein-coding	407.727	0.228744	0.151411	1.51075	0.130853	0.999987	3212	HOXB2
WNT7B|-|-|22q13.31|protein-coding	8.43773	1.69287	1.0342	1.6369	0.101652	0.999987	7477	WNT7B
SNORD116-4|HBII-85-4|-|15q11.2|snoRNA	2.20615	0.216705	1.66965	0.129791	0.896732	0.999987	100033416	SNORD116-4
PALB2|FANCN|PNCA3|-|16p12.2|protein-coding	373.748	0.154962	0.192363	0.805571	0.42049	0.999987	79728	PALB2
MGST1|GST12|MGST|MGST-I|-|12p12.3|protein-coding	4043.13	0.231529	0.229356	1.00947	0.312748	0.999987	4257	MGST1
KIAA1211L|C2orf55|-|2q11.2|protein-coding	10.1723	-0.577811	0.877251	-0.658661	0.510114	0.999987	343990	KIAA1211L
SESN1|PA26|SEST1|-|6q21|protein-coding	327.496	-0.283925	0.164598	-1.72496	0.0845354	0.999987	27244	SESN1
MYOM3|-|-|1p36.11|protein-coding	3.81293	-2.69942	1.30533	-2.068	0.0386397	0.999987	127294	MYOM3
KCTD8|-|-|4p13|protein-coding	0.679843	-1.47801	3.75129	-0.393999	0.693582	0.999987	386617	KCTD8
GALNT10|GALNACT10|PPGALNACT10|PPGANTASE10|-|5q33.2|protein-coding	3279.51	0.0359052	0.228495	0.157138	0.875136	0.999987	55568	GALNT10
VPS41|HVPS41|HVSP41|hVps41p|-|7p14.1|protein-coding	990.572	-0.0906013	0.143313	-0.632191	0.527262	0.999987	27072	VPS41
RAB28|CORD18|-|4p15.33|protein-coding	314.614	0.0466454	0.147759	0.315686	0.752241	0.999987	9364	RAB28
ZCCHC24|C10orf56|Z3CXXC8|-|10q22.3|protein-coding	936.862	-0.120848	0.153644	-0.786545	0.431548	0.999987	219654	ZCCHC24
NIFK|MKI67IP|Nopp34|-|2q14.3|protein-coding	1732.89	0.105034	0.116675	0.900227	0.367999	0.999987	84365	NIFK
ATF6B|CREB-RP|CREBL1|G13|-|6p21.32|protein-coding	1589.01	-0.103742	0.213483	-0.48595	0.627003	0.999987	1388	ATF6B
STEAP2|IPCA1|PCANAP1|PUMPCn|STAMP1|STMP|-|7q21.13|protein-coding	926.193	-0.130012	0.310241	-0.419068	0.675166	0.999987	261729	STEAP2
CFAP206|C6orf165|dJ382I10.1|-|6q15|protein-coding	8.89865	-0.13574	0.829236	-0.163693	0.869973	0.999987	154313	CFAP206
RPL23A|L23A|MDA20|-|17q11.2|protein-coding	1829.08	0.0921515	0.107933	0.853785	0.393224	0.999987	6147	RPL23A
MEIS3P1|MEIS3|MEIS4|MRG2|-|17p12|pseudo	74.6727	0.142535	0.280056	0.508952	0.610786	0.999987	4213	MEIS3P1
CLEC7A|BGR|CANDF4|CD369|CLECSF12|DECTIN1|SCARE2|-|12p13.2|protein-coding	1.88492	0.890128	2.48909	0.357612	0.720634	0.999987	64581	CLEC7A
HMG20B|BRAF25|BRAF35|HMGX2|HMGXB2|PP7706|SMARCE1r|SOXL|pp8857|-|19p13.3|protein-coding	850.511	0.00227053	0.131507	0.0172654	0.986225	0.999987	10362	HMG20B
UBE2S|E2-EPF|E2EPF|EPF5|-|19q13.42|protein-coding	148.939	0.0380093	0.271787	0.13985	0.888779	0.999987	27338	UBE2S
ZSWIM6|AFND|-|5q12.1|protein-coding	487.948	0.0252731	0.125444	0.201469	0.840332	0.999987	57688	ZSWIM6
USF1|FCHL|FCHL1|HYPLIP1|MLTF|MLTFI|UEF|bHLHb11|-|1q23.3|protein-coding	595.725	-0.152555	0.124933	-1.22109	0.222051	0.999987	7391	USF1
TSLP|-|-|5q22.1|protein-coding	2.78308	1.32045	1.4574	0.90603	0.36492	0.999987	85480	TSLP
WDR81|CAMRQ2|PPP1R166|SORF-2|-|17p13.3|protein-coding	947.612	-0.0959061	0.0997685	-0.961287	0.336408	0.999987	124997	WDR81
MIR6502|hsa-mir-6502|-|12q14.3|ncRNA	6.12502	-0.348832	0.884869	-0.394219	0.693419	0.999987	102465249	MIR6502
IPW|NCRNA00002|-|15q11.2|ncRNA	90.0584	0.022088	0.372151	0.0593522	0.952672	0.999987	3653	IPW
ERMP1|FXNA|KIAA1815|bA207C16.3|-|9p24.1|protein-coding	328.065	-0.045482	0.202763	-0.224311	0.822515	0.999987	79956	ERMP1
DACH1|DACH|-|13q21.33|protein-coding	0.851179	-1.89734	2.82161	-0.672432	0.501309	0.999987	1602	DACH1
PPP1R3G|-|-|6p25.1|protein-coding	24.8394	0.496842	0.504085	0.985631	0.324314	0.999987	648791	PPP1R3G
LPL|HDLCQ11|LIPD|-|8p21.3|protein-coding	3.095	-1.07864	1.26891	-0.850055	0.395295	0.999987	4023	LPL
MT1G|MT1|MT1K|-|16q13|protein-coding	4.00366	-0.44569	1.1017	-0.404546	0.685811	0.999987	4495	MT1G
IGFBP5|IBP5|-|2q35|protein-coding	14.0568	1.24305	0.974666	1.27536	0.202182	0.999987	3488	IGFBP5
PFKM|ATP-PFK|GSD7|PFK-1|PFK1|PFKA|PFKX|PPP1R122|-|12q13.11|protein-coding	1683.5	0.0281635	0.14156	0.198951	0.842301	0.999987	5213	PFKM
PTPRC|B220|CD45|CD45R|GP180|L-CA|LCA|LY5|T200|-|1q31.3-q32.1|protein-coding	7.15487	-1.16798	0.909938	-1.28359	0.199287	0.999987	5788	PTPRC
LOC101928126|-|-|21q22.11|ncRNA	0.673758	-0.0106719	3.02309	-0.00353012	0.997183	0.999987	101928126	LOC101928126
MIR6834|hsa-mir-6834|-|6p21.32|ncRNA	12.836	0.448838	0.580699	0.772927	0.439565	0.999987	102465501	MIR6834
SNORD69|HBII-210|-|3p21.1|snoRNA	1.6334	-0.55697	1.66402	-0.334712	0.737842	0.999987	692109	SNORD69
MIR6807|hsa-mir-6807|-|19q13.43|ncRNA	35.4674	0.332565	0.377171	0.881736	0.37792	0.999987	102465976	MIR6807
PSEN1|AD3|FAD|PS-1|PS1|S182|-|14q24.2|protein-coding	1530.41	-0.157469	0.103148	-1.52664	0.126852	0.999987	5663	PSEN1
PDP1|PDH|PDP|PDPC|PPM2A|PPM2C|-|8q22.1|protein-coding	1666.59	0.147207	0.141471	1.04055	0.298086	0.999987	54704	PDP1
RGS4|RGP4|SCZD9|-|1q23.3|protein-coding	2586.59	0.120915	0.582313	0.207646	0.835505	0.999987	5999	RGS4
SPON1|VSGP/F-spondin|f-spondin|-|11p15.2|protein-coding	21.053	1.13194	0.978059	1.15733	0.247137	0.999987	10418	SPON1
CWC27|NY-CO-10|SDCCAG-10|SDCCAG10|-|5q12.3|protein-coding	817.475	0.152931	0.127193	1.20235	0.229228	0.999987	10283	CWC27
LOC100289561|-|-|7q22.1|protein-coding	21.8458	0.0924446	0.462117	0.200046	0.841445	0.999987	100289561	LOC100289561
RFXAP|-|-|13q13.3|protein-coding	72.7808	0.0761574	0.30427	0.250295	0.802359	0.999987	5994	RFXAP
MFHAS1|LRRC65|MASL1|-|8p23.1|protein-coding	168.892	0.629654	0.252406	2.49461	0.0126094	0.999987	9258	MFHAS1
BRAT1|BAAT1|C7orf27|RMFSL|-|7p22.3|protein-coding	371.78	0.0247038	0.188164	0.131288	0.895547	0.999987	221927	BRAT1
STK32C|PKE|YANK3|-|10q26.3|protein-coding	126.502	-0.28333	0.216205	-1.31047	0.190037	0.999987	282974	STK32C
MIR5581|-|-|1p34.3|ncRNA	0.500361	2.46379	3.9862	0.618079	0.536523	0.999987	100847010	MIR5581
PHPT1|CGI-202|HEL-S-132P|HSPC141|PHP|PHP14|-|9q34.3|protein-coding	841.065	-0.282127	0.170627	-1.65347	0.0982354	0.999987	29085	PHPT1
ETFDH|ETFQO|MADD|-|4q32.1|protein-coding	550.745	-0.0481198	0.129223	-0.372377	0.709612	0.999987	2110	ETFDH
FAM8A1|AHCP|-|6p22.3|protein-coding	453.306	0.0604753	0.201312	0.300405	0.763868	0.999987	51439	FAM8A1
GARS|CMT2D|DSMAV|GlyRS|HMN5|SMAD1|-|7p14.3|protein-coding	6241.9	-0.0948828	0.265522	-0.357344	0.720834	0.999987	2617	GARS
PRPF40A|FBP-11|FBP11|FLAF1|FNBP3|HIP-10|HIP10|HYPA|NY-REN-6|Prp40|-|2q23.3|protein-coding	3157.34	0.119367	0.143372	0.832569	0.405088	0.999987	55660	PRPF40A
ACBD7-DCLRE1CP1|-|-|-|ncRNA	0.991882	-0.989836	2.01732	-0.490668	0.623662	0.999987	108949267	ACBD7-DCLRE1CP1
MRPL18|HSPC071|L18mt|MRP-L18|-|6q25.3|protein-coding	1288.22	0.0985697	0.110348	0.893258	0.371719	0.999987	29074	MRPL18
NOMO1|Nomo|PM5|-|16p13.11|protein-coding	805.059	-0.472432	0.207666	-2.27496	0.0229084	0.999987	23420	NOMO1
MELTF|CD228|MAP97|MFI2|MTF1|MTf|-|3q29|protein-coding	22.9908	-0.820193	0.640778	-1.28	0.200547	0.999987	4241	MELTF
THADA|ARMC13|GITA|-|2p21|protein-coding	962.399	0.0910891	0.119032	0.765248	0.444124	0.999987	63892	THADA
CLUAP1|CFAP22|FAP22|IFT38|-|16p13.3|protein-coding	387.771	0.0480256	0.132631	0.3621	0.717277	0.999987	23059	CLUAP1
ZFP82|ZNF545|-|19q13.12|protein-coding	129.594	-0.249185	0.267185	-0.932632	0.35101	0.999987	284406	ZFP82
GRB7|-|-|17q12|protein-coding	0.956543	-0.952907	2.74087	-0.347666	0.728091	0.999987	2886	GRB7
TMEM2|-|-|9q21.13|protein-coding	5053.08	-0.114481	0.164133	-0.697489	0.485497	0.999987	23670	TMEM2
ZSCAN20|KOX29|ZFP-31|ZNF31|ZNF360|-|1p35.1|protein-coding	128.903	-0.164598	0.274177	-0.600333	0.548284	0.999987	7579	ZSCAN20
MAMDC2-AS1|-|-|9q21.12|ncRNA	1.16884	-2.46596	2.15379	-1.14494	0.252233	0.999987	100507244	MAMDC2-AS1
KIF9-AS1|-|-|3p21.31|ncRNA	24.2476	-0.00583893	0.437938	-0.0133328	0.989362	0.999987	285352	KIF9-AS1
TMEM167B|AD-020|C1orf119|-|1p13.3|protein-coding	915.19	-0.0646224	0.101161	-0.638804	0.52295	0.999987	56900	TMEM167B
SCG3|SGIII|-|15q21.2|protein-coding	1.17194	-2.46955	2.15364	-1.14669	0.251511	0.999987	29106	SCG3
ATXN7L3B|lnc-SCA7|-|12q21.1|protein-coding	1653.11	-0.0396429	0.0911253	-0.435037	0.663536	0.999987	552889	ATXN7L3B
ZNF23|KOX16|ZNF359|ZNF612|Zfp612|-|16q22.2|protein-coding	398.752	0.105056	0.130929	0.802387	0.422329	0.999987	7571	ZNF23
FGGY|-|-|1p32.1|protein-coding	120.861	0.105617	0.23341	0.452495	0.650913	0.999987	55277	FGGY
ARHGEF10|GEF10|SNCV|-|8p23.3|protein-coding	1399.85	-0.0855357	0.140322	-0.609569	0.542148	0.999987	9639	ARHGEF10
ZNF730|-|-|19p12|protein-coding	6.46635	0.354552	1.12048	0.31643	0.751676	0.999987	100129543	ZNF730
GGA3|-|-|17q25.1|protein-coding	617.265	-0.0175696	0.129868	-0.135288	0.892384	0.999987	23163	GGA3
PNMAL2|-|-|19q13.32|protein-coding	15.8949	0.0528914	0.747875	0.0707222	0.943619	0.999987	57469	PNMAL2
POLR3G|RPC32|RPC7|-|5q14.3|protein-coding	1022.65	-0.240251	0.356335	-0.674229	0.500166	0.999987	10622	POLR3G
GLT8D2|-|-|12q23.3|protein-coding	330.842	0.0442248	0.248307	0.178105	0.85864	0.999987	83468	GLT8D2
AHI1|AHI-1|JBTS3|ORF1|dJ71N10.1|-|6q23.3|protein-coding	530.334	0.101916	0.128946	0.79038	0.429306	0.999987	54806	AHI1
FOXO4|AFX|AFX1|MLLT7|-|Xq13.1|protein-coding	94.3906	0.0276704	0.262768	0.105303	0.916135	0.999987	4303	FOXO4
INTS2|INT2|KIAA1287|-|17q23.2|protein-coding	428.519	0.140007	0.132527	1.05644	0.290766	0.999987	57508	INTS2
DOLPP1|LSFR2|-|9q34.11|protein-coding	438.557	-0.05899	0.140286	-0.420497	0.674123	0.999987	57171	DOLPP1
EIF3H|EIF3S3|eIF3-gamma|eIF3-p40|-|8q23.3-q24.11|protein-coding	4172.75	0.0360104	0.126413	0.284862	0.77575	0.999987	8667	EIF3H
THTPA|THTP|THTPASE|-|14q11.2|protein-coding	156.829	0.232452	0.208393	1.11545	0.264657	0.999987	79178	THTPA
FAM109B|IPIP27B|Ses2|-|22q13.2|protein-coding	631.197	-0.0498623	0.146082	-0.34133	0.732855	0.999987	150368	FAM109B
CDRT4|-|-|17p12|protein-coding	93.3361	-0.488947	0.291968	-1.67466	0.0940013	0.999987	284040	CDRT4
DOCK8|HEL-205|MRD2|ZIR8|-|9p24.3|protein-coding	121.062	-0.230797	0.521137	-0.442872	0.657858	0.999987	81704	DOCK8
LMNTD2|C11orf35|-|11p15.5|protein-coding	0.996353	-0.980711	2.27322	-0.43142	0.666163	0.999987	256329	LMNTD2
FAM174A|HGS_RE408|NS5ATP6|TMEM157|UNQ1912|-|5q21.1|protein-coding	130.414	0.1001	0.266218	0.376007	0.706911	0.999987	345757	FAM174A
KCMF1|DEBT91|FIGC|PCMF|ZZZ1|-|2p11.2|protein-coding	1474.49	0.0520924	0.101574	0.512854	0.608053	0.999987	56888	KCMF1
TRIM58|BIA2|-|1q44|protein-coding	0.346458	0.0322791	4.08047	0.00791063	0.993688	0.999987	25893	TRIM58
OSBPL1A|ORP-1|ORP1|OSBPL1B|-|18q11.2|protein-coding	661.321	-0.122391	0.182809	-0.669503	0.503175	0.999987	114876	OSBPL1A
GNA13|G13|-|17q24.1|protein-coding	1560.2	0.0172228	0.150024	0.1148	0.908603	0.999987	10672	GNA13
SLC43A3|EEG1|FOAP-13|PRO1659|SEEEG-1|-|11q12.1|protein-coding	1968.11	0.205332	0.209444	0.980367	0.326905	0.999987	29015	SLC43A3
ZP3|ZP3A|ZP3B|ZPC|Zp-3|-|7q11.23|protein-coding	30.9129	-0.126756	0.55254	-0.229405	0.818554	0.999987	7784	ZP3
MIR4712|-|-|15q21.2|ncRNA	2.47873	0.605948	1.32385	0.457717	0.647155	0.999987	100616396	MIR4712
SNORA2C|ACA34|MIR1291|SNORA34|-|12q13.11|snoRNA	1.70751	0.587501	2.01248	0.291929	0.770341	0.999987	677815	SNORA2C
ACOX2|BCOX|BRCACOX|BRCOX|THCCox|-|3p14.3|protein-coding	54.5431	-0.627359	0.519667	-1.20723	0.227343	0.999987	8309	ACOX2
LINS1|LINS|MRT27|WINS1|-|15q26.3|protein-coding	209.458	0.175224	0.185465	0.944787	0.344768	0.999987	55180	LINS1
RBMS3|-|-|3p24.1|protein-coding	319.435	-0.148714	0.182824	-0.813428	0.415973	0.999987	27303	RBMS3
LSR|ILDR3|LISCH7|-|19q13.12|protein-coding	50.7275	0.15552	0.396237	0.392492	0.694695	0.999987	51599	LSR
FCGR2A|CD32|CD32A|CDw32|FCG2|FCGR2|FCGR2A1|FcGR|IGFR2|-|1q23.3|protein-coding	3.58215	-0.185038	1.23465	-0.149871	0.880866	0.999987	2212	FCGR2A
GPR176|HB-954|-|15q14-q15.1|protein-coding	5148.82	-0.138764	0.118383	-1.17216	0.241133	0.999987	11245	GPR176
ASXL2|ASXH2|SHAPNS|-|2p23.3|protein-coding	1030.62	-0.0243389	0.10351	-0.235137	0.814103	0.999987	55252	ASXL2
CAPG|AFCP|HEL-S-66|MCP|-|2p11.2|protein-coding	1687.95	-0.162105	0.219693	-0.737871	0.460593	0.999987	822	CAPG
PRDM2|HUMHOXY1|KMT8|KMT8A|MTB-ZF|RIZ|RIZ1|RIZ2|-|1p36.21|protein-coding	696.243	0.0753625	0.126447	0.595999	0.551176	0.999987	7799	PRDM2
TMEM41B|-|-|11p15.4|protein-coding	598.601	0.206508	0.190544	1.08378	0.278461	0.999987	440026	TMEM41B
SWT1|C1orf26|HsSwt1|-|1q25.3|protein-coding	85.1637	-0.199874	0.317751	-0.629027	0.529331	0.999987	54823	SWT1
TNIK|MRT54|-|3q26.2-q26.31|protein-coding	16.8511	0.0963917	0.834015	0.115576	0.907989	0.999987	23043	TNIK
ATP6V1B1|ATP6B1|RTA1B|VATB|VMA2|VPP3|-|2p13.3|protein-coding	10.6232	-0.135969	0.740053	-0.183728	0.854227	0.999987	525	ATP6V1B1
ZFHX2|ZFH-5|ZNF409|-|14q11.2|protein-coding	2.64614	0.799431	1.42837	0.559682	0.575697	0.999987	85446	ZFHX2
C16orf62|-|-|16p12.3|protein-coding	1569.56	-0.176735	0.142265	-1.24229	0.214128	0.999987	57020	C16orf62
LINC01490|-|-|12q21.31|ncRNA	0.842462	-0.57576	2.88728	-0.199413	0.84194	0.999987	101928420	LINC01490
KAT5|ESA1|HTATIP|HTATIP1|PLIP|TIP|TIP60|ZC2HC5|cPLA2|-|11q13.1|protein-coding	762.954	0.0507466	0.112957	0.449257	0.653247	0.999987	10524	KAT5
LINC00950|FP588|-|9p13.3|ncRNA	2.52908	1.52271	1.43279	1.06276	0.287892	0.999987	92973	LINC00950
MIR6805|hsa-mir-6805|-|19q13.42|ncRNA	5.4352	0.652011	0.979584	0.6656	0.505667	0.999987	102465483	MIR6805
RAB2A|LHX|RAB2|-|8q12.1-q12.2|protein-coding	2608.69	0.149997	0.0981431	1.52835	0.126427	0.999987	5862	RAB2A
SLC4A11|BTR1|CDPD1|CHED|CHED2|NABC1|dJ794I6.2|-|20p13|protein-coding	72.4746	-0.558317	0.349627	-1.59689	0.11029	0.999987	83959	SLC4A11
GCK|FGQTL3|GK|GLK|HHF3|HK4|HKIV|HXKP|LGLK|MODY2|-|7p13|protein-coding	2.19467	1.77491	1.55687	1.14005	0.254265	0.999987	2645	GCK
LCTL|KLG|KLPH|-|15q22.31|protein-coding	0.506667	-0.900272	3.22583	-0.279082	0.780182	0.999987	197021	LCTL
GALNT14|GALNT15|GalNac-T10|GalNac-T14|-|2p23.1|protein-coding	41.9588	-0.138581	0.737521	-0.187901	0.850954	0.999987	79623	GALNT14
ZNF888|-|-|19q13.41|protein-coding	56.2289	-0.202226	0.321474	-0.629058	0.529311	0.999987	388559	ZNF888
XYLT1|DBQD2|PXYLT1|XT-I|XT1|XTI|XYLTI|xylT-I|-|16p12.3|protein-coding	1424.72	-0.0273099	0.159198	-0.171546	0.863794	0.999987	64131	XYLT1
ZBTB49|ZNF509|-|4p16.3|protein-coding	99.7025	0.0637479	0.235886	0.270249	0.786969	0.999987	166793	ZBTB49
SLC48A1|HRG-1|HRG1|hHRG-1|-|12q13.11|protein-coding	207.037	0.240133	0.250218	0.959695	0.337209	0.999987	55652	SLC48A1
MIR4685|-|-|10q24.2|ncRNA	0.342211	1.91147	4.03588	0.473618	0.635773	0.999987	100616482	MIR4685
RIMS4|C20orf190|RIM 4|RIM-4|RIM4|RIM4-gamma|RIM4gamma|-|20q13.12|protein-coding	0.492095	0.932552	3.24622	0.287273	0.773903	0.999987	140730	RIMS4
EFCAB5|-|-|17q11.2|protein-coding	15.6266	0.342785	0.533785	0.642179	0.520757	0.999987	374786	EFCAB5
SEMA6A-AS1|CTB-118N6.3|-|5q23.1|ncRNA	3.18231	1.15113	1.12534	1.02291	0.306348	0.999987	101927233	SEMA6A-AS1
ESR1|ER|ESR|ESRA|ESTRR|Era|NR3A1|-|6q25.1-q25.2|protein-coding	3.25416	0.692816	1.69834	0.407937	0.68332	0.999987	2099	ESR1
SMPD3|NSMASE2|-|16q22.1|protein-coding	0.809521	-1.81861	2.84038	-0.640271	0.521997	0.999987	55512	SMPD3
DDX59|OFD5|ZNHIT5|-|1q32.1|protein-coding	339.443	0.123816	0.146478	0.845286	0.397951	0.999987	83479	DDX59
RAD51B|R51H2|RAD51L1|REC2|-|14q24.1|protein-coding	85.4033	0.161496	0.266836	0.605225	0.545029	0.999987	5890	RAD51B
CDC42EP4|BORG4|CEP4|KAIA1777|-|17q25.1|protein-coding	1002.72	-0.0702015	0.17139	-0.409602	0.682098	0.999987	23580	CDC42EP4
TNFSF13|APRIL|CD256|TALL-2|TALL2|TNLG7B|TRDL-1|UNQ383/PRO715|ZTNF2|-|17p13.1|protein-coding	58.9061	0.0741933	0.361404	0.205292	0.837344	0.999987	8741	TNFSF13
IRX4|IRXA3|-|5p15.33|protein-coding	0.492781	-0.851767	3.24238	-0.262698	0.792783	0.999987	50805	IRX4
[truncated: 25,143 more rows]

## Sheet: endo_vs_fibro_DESeq2_iVEC_cl
	baseMean	log2FoldChange	lfcSE	stat	pvalue	padj	GeneID	Symbol
ESAM|W117m|-|11q24.2|protein-coding	2380.71	6.3252	0.263982	23.9607	7.13991e-127	1.20679e-122	90952	ESAM
JAG2|HJ2|SER2|-|14q32.33|protein-coding	972.591	6.10613	0.278836	21.8986	2.67629e-106	2.26173e-102	3714	JAG2
TNFSF10|APO2L|Apo-2L|CD253|TL2|TNLG6A|TRAIL|-|3q26.31|protein-coding	836.662	5.79648	0.281017	20.6268	1.57659e-94	8.88253e-91	8743	TNFSF10
NOTCH4|INT3|-|6p21.32|protein-coding	2434.08	6.24458	0.305618	20.4326	8.57801e-93	3.62464e-89	4855	NOTCH4
ARHGAP27|CAMGAP1|PP905|SH3D20|SH3P20|-|17q21.31|protein-coding	883.599	4.85403	0.24588	19.7415	9.49978e-87	3.2113e-83	201176	ARHGAP27
PIK3C2B|C2-PI3K|-|1q32.1|protein-coding	368.045	5.67	0.287894	19.6947	2.39326e-86	6.74182e-83	5287	PIK3C2B
FAM124B|-|-|2q36.2|protein-coding	295.102	7.07344	0.360825	19.6035	1.44353e-85	3.48552e-82	79843	FAM124B
CCDC88C|DAPLE|HKRP2|KIAA1509|SCA40|-|14q32.11-q32.12|protein-coding	436.672	6.4178	0.340095	18.8706	1.99031e-79	4.07964e-76	440193	CCDC88C
HID1|C17orf28|DMC1|HID-1|-|17q25.1|protein-coding	237.38	6.42235	0.34042	18.866	2.17233e-79	4.07964e-76	283987	HID1
CXCR4|CD184|D2S201E|FB22|HM89|HSY3RR|LAP-3|LAP3|LCR1|LESTR|NPY3R|NPYR|NPYRL|NPYY3R|WHIM|WHIMS|-|2q22.1|protein-coding	3398.92	6.70365	0.355479	18.8581	2.52198e-79	4.26265e-76	7852	CXCR4
EFNA1|B61|ECKLG|EFL1|EPLG1|LERK-1|LERK1|TNFAIP4|-|1q22|protein-coding	868.826	6.75461	0.358746	18.8284	4.42156e-79	6.79392e-76	1942	EFNA1
BCAM|AU|CD239|LU|MSK19|-|19q13.32|protein-coding	731.731	4.2191	0.224551	18.789	9.28722e-79	1.3081e-75	4059	BCAM
CD34|-|-|1q32.2|protein-coding	4228.97	6.93857	0.370238	18.7409	2.29821e-78	2.98802e-75	947	CD34
TMC6|EV1|EVER1|EVIN1|LAK-4P|-|17q25.3|protein-coding	227.141	6.49374	0.3487	18.6227	2.10246e-77	2.53827e-74	11322	TMC6
SHANK3|DEL22q13.3|PROSAP2|PSAP2|SCZD15|SPANK-2|-|22q13.33|protein-coding	2882.04	4.35976	0.236053	18.4694	3.63941e-76	4.10088e-73	85358	SHANK3
SCARF1|SREC|SREC-I|SREC1|-|17p13.3|protein-coding	798.261	5.49454	0.299228	18.3624	2.62806e-75	2.77622e-72	8578	SCARF1
MYO5C|-|-|15q21.2|protein-coding	347.738	6.60556	0.36056	18.3203	5.69994e-75	5.66708e-72	55930	MYO5C
PCDH12|VE-cadherin-2|VECAD2|-|5q31.3|protein-coding	3482.42	6.79608	0.37133	18.302	7.98037e-75	7.49356e-72	51294	PCDH12
ARRB1|ARB1|ARR1|-|11q13.4|protein-coding	1648.2	3.90905	0.214701	18.2069	4.54583e-74	4.04387e-71	408	ARRB1
ADGRF5|GPR116|KPG_001|-|6p12.3|protein-coding	3601.21	5.91083	0.325322	18.1692	9.05681e-74	7.63003e-71	221395	ADGRF5
WSCD1|-|-|17p13.2|protein-coding	817.623	7.13583	0.392798	18.1667	9.47998e-74	7.63003e-71	23302	WSCD1
CXorf36|4930578C19Rik|DIA1R|EPQL1862|PRO3743|bA435K1.1|-|Xp11.3|protein-coding	1534.22	6.97714	0.384973	18.1237	2.07191e-73	1.59179e-70	79742	CXorf36
STAB1|CLEVER-1|FEEL-1|FELE-1|FEX1|SCARH2|STAB-1|-|3p21.1|protein-coding	2204.95	6.45401	0.359984	17.9286	7.05534e-72	5.18475e-69	23166	STAB1
SEMA6B|SEM-SEMA-Y|SEMA-VIB|SEMAN|semaZ|-|19p13.3|protein-coding	2999.4	6.9805	0.392783	17.7719	1.16646e-70	8.21481e-68	10501	SEMA6B
PDGFB|IBGC5|PDGF-2|PDGF2|SIS|SSV|c-sis|-|22q13.1|protein-coding	1145.16	7.11845	0.401599	17.7253	2.6756e-70	1.80892e-67	5155	PDGFB
EGFL7|NEU1|VE-STATIN|ZNEU1|-|9q34.3|protein-coding	3745.32	6.33911	0.362332	17.4953	1.5555e-68	1.0112e-65	51162	EGFL7
PALD1|KIAA1274|PALD|-|10q22.1|protein-coding	1830.46	6.90933	0.396441	17.4284	5.02361e-68	3.14478e-65	27143	PALD1
SEMA6A|HT018|SEMA|SEMA6A1|SEMAQ|VIA|-|5q23.1|protein-coding	308.558	6.15793	0.356359	17.2802	6.63685e-67	4.00629e-64	57556	SEMA6A
ELMO1|CED-12|CED12|ELMO-1|-|7p14.2-p14.1|protein-coding	416.094	7.16588	0.415856	17.2316	1.53722e-66	8.95936e-64	9844	ELMO1
PLCG2|APLAID|FCAS3|PLC-IV|PLC-gamma-2|-|16q23.3|protein-coding	248.133	6.39481	0.37201	17.1899	3.16189e-66	1.78141e-63	5336	PLCG2
BCL6B|BAZF|ZBTB28|ZNF62|-|17p13.1|protein-coding	1773.38	6.50124	0.379915	17.1123	1.20062e-65	6.54611e-63	255877	BCL6B
EXOC3L1|EXOC3L|-|16q22.1|protein-coding	206.51	6.0215	0.352056	17.1038	1.39051e-65	7.34452e-63	283849	EXOC3L1
ARHGAP4|C1|RGC1|RhoGAP4|SrGAP4|p115|-|Xq28|protein-coding	191.276	3.92908	0.229829	17.0957	1.59874e-65	8.18844e-63	393	ARHGAP4
SOX18|HLTRS|HLTS|-|20q13.33|protein-coding	1371.8	6.9242	0.405189	17.0888	1.79752e-65	8.93581e-63	54345	SOX18
MGAT4A|GNT-IV|GNT-IVA|GnT-4a|-|2q11.2|protein-coding	526.016	6.60201	0.387373	17.043	3.93779e-65	1.90161e-62	11320	MGAT4A
CYTL1|C17|C4orf4|-|4p16.2|protein-coding	208.265	6.27352	0.368488	17.025	5.35676e-65	2.515e-62	54360	CYTL1
TSPAN15|2700063A19Rik|NET-7|NET7|TM4SF15|-|10q22.1|protein-coding	1590.51	5.26304	0.313685	16.7781	3.53028e-63	1.61267e-60	23555	TSPAN15
VWF|F8VWF|VWD|-|12p13.31|protein-coding	29631.2	7.09123	0.423838	16.731	7.79395e-63	3.46667e-60	7450	VWF
GMFG|GMF-GAMMA|-|19q13.2|protein-coding	285.975	4.84496	0.290271	16.6912	1.52011e-62	6.58794e-60	9535	GMFG
NOVA2|ANOVA|NOVA3|-|19q13.32|protein-coding	380.854	6.77679	0.407758	16.6197	5.02156e-62	2.12186e-59	4858	NOVA2
RASAL3|-|-|19p13.12|protein-coding	303.342	6.51747	0.394356	16.5269	2.34977e-61	9.68676e-59	64926	RASAL3
DLL4|AOS6|hdelta2|-|15q15.1|protein-coding	2430.66	7.0447	0.428717	16.432	1.12822e-60	4.54027e-58	54567	DLL4
EDN1|ARCND3|ET1|HDLCQ7|PPET1|QME|-|6p24.1|protein-coding	889.406	5.89983	0.360774	16.3533	4.12263e-60	1.62048e-57	1906	EDN1
F2RL3|PAR4|-|19p13.11|protein-coding	1271.07	6.96797	0.426562	16.3352	5.54599e-60	2.13042e-57	9002	F2RL3
SH2D3C|CHAT|NSP3|PRO34088|SHEP1|-|9q34.11|protein-coding	755.243	5.56775	0.341039	16.3258	6.46657e-60	2.42884e-57	10044	SH2D3C
N4BP3|LZTS4|-|5q35.3|protein-coding	1610.83	6.83969	0.419681	16.2974	1.03039e-59	3.78602e-57	23138	N4BP3
DOCK9|ZIZ1|ZIZIMIN1|-|13q32.3|protein-coding	3212.35	4.28009	0.262797	16.2867	1.22638e-59	4.41026e-57	23348	DOCK9
GRAP|-|-|17p11.2|protein-coding	536.303	6.83819	0.420691	16.2547	2.0697e-59	7.28792e-57	10750	GRAP
TM4SF18|L6D|-|3q25.1|protein-coding	977.111	7.01526	0.431998	16.2391	2.66834e-59	9.20415e-57	116441	TM4SF18
USHBP1|AIEBP|MCC2|-|19p13.11|protein-coding	172.367	6.52981	0.403823	16.17	8.21015e-59	2.77536e-56	83878	USHBP1
ZNF467|EZI|Zfp467|-|7q36.1|protein-coding	249.91	5.33246	0.330201	16.1492	1.15122e-58	3.81528e-56	168544	ZNF467
PECAM1|CD31|CD31/EndoCAM|GPIIA'|PECA1|PECAM-1|endoCAM|-|17q23.3|protein-coding	10912.7	6.85257	0.42459	16.1393	1.35087e-58	4.39083e-56	5175	PECAM1
CYP1A1|AHH|AHRR|CP11|CYP1|CYPIA1|P1-450|P450-C|P450DX|-|15q24.1|protein-coding	385.218	7.08912	0.441806	16.0458	6.11811e-58	1.9511e-55	1543	CYP1A1
FLT4|FLT-4|FLT41|LMPH1A|PCL|VEGFR-3|VEGFR3|-|5q35.3|protein-coding	1378.63	6.6483	0.415821	15.9884	1.53996e-57	4.82006e-55	2324	FLT4
DOCK6|AOS2|ZIR1|-|19p13.2|protein-coding	3431.95	2.94836	0.18689	15.7759	4.55694e-56	1.40039e-53	57572	DOCK6
ABCA3|ABC-C|ABC3|EST111653|LBM180|SMDP3|-|16p13.3|protein-coding	535.391	5.15793	0.328872	15.6837	1.95467e-55	5.8996e-53	21	ABCA3
HCLS1|CTTNL|HS1|lckBP1|p75|-|3q13.33|protein-coding	522.35	5.18983	0.332983	15.5859	9.08164e-55	2.69295e-52	3059	HCLS1
MMRN2|EMILIN-3|EMILIN3|ENDOGLYX-1|-|10q23.2|protein-coding	2725.66	5.56378	0.357811	15.5495	1.60362e-54	4.67318e-52	79812	MMRN2
RNASE1|RAC1|RIB1|RNS1|-|14q11.2|protein-coding	600.835	6.79625	0.437353	15.5395	1.87381e-54	5.36799e-52	6035	RNASE1
KCNN3|KCa2.3|SK3|SKCA3|hSK3|-|1q21.3|protein-coding	266.59	5.95201	0.385511	15.4393	8.9116e-54	2.5104e-51	3782	KCNN3
PALMD|C1orf11|PALML|-|1p21.2|protein-coding	494.353	6.05334	0.392918	15.4061	1.4886e-53	4.12464e-51	54873	PALMD
NOS3|ECNOS|eNOS|-|7q36.1|protein-coding	674.955	6.08105	0.395362	15.3809	2.19708e-53	5.98953e-51	4846	NOS3
HSPA12B|C20orf60|-|20p13|protein-coding	503.369	6.29387	0.410099	15.3472	3.69874e-53	9.92319e-51	116835	HSPA12B
RAMP2|-|-|17q21.2|protein-coding	375.089	5.99719	0.391347	15.3245	5.24718e-53	1.38575e-50	10266	RAMP2
DYSF|FER1L1|LGMD2B|MMD1|-|2p13.2|protein-coding	3498.52	6.47084	0.424339	15.2492	1.66632e-52	4.33293e-50	8291	DYSF
GPIHBP1|GPI-HBP1|HYPL1D|-|8q24.3|protein-coding	1612.69	7.22662	0.47428	15.237	2.00757e-52	5.1412e-50	338328	GPIHBP1
ROBO4|ECSM4|MRB|-|11q24.2|protein-coding	2951.05	6.61283	0.434719	15.2117	2.95667e-52	7.45876e-50	54538	ROBO4
LYVE1|CRSBP-1|HAR|LYVE-1|XLKD1|-|11p15.4|protein-coding	1541.48	7.03358	0.462995	15.1915	4.02709e-52	1.00097e-49	10894	LYVE1
CCM2L|C20orf160|dJ310O13.5|-|20q11.21|protein-coding	242.519	5.3225	0.351335	15.1494	7.6517e-52	1.87433e-49	140706	CCM2L
ICA1|ICA69|ICAp69|-|7p21.3|protein-coding	209.237	6.28487	0.415315	15.1328	9.84199e-52	2.37642e-49	3382	ICA1
PRKCH|PKC-L|PKCL|PRKCL|nPKC-eta|-|14q23.1|protein-coding	1051.07	5.73019	0.379847	15.0855	2.01691e-51	4.80138e-49	5583	PRKCH
CD93|C1QR1|C1qR(P)|C1qRP|CDw93|ECSM3|MXRA4|dJ737E23.1|-|20p11.21|protein-coding	11165	6.64015	0.444527	14.9376	1.87654e-50	4.40517e-48	22918	CD93
FAM213A|C10orf58|PAMM|-|10q23.1|protein-coding	1059.05	6.27723	0.421392	14.8964	3.47763e-50	8.05191e-48	84293	FAM213A
VASH1|KIAA1036|-|14q24.3|protein-coding	3382.11	4.37195	0.294196	14.8607	5.93087e-50	1.35464e-47	22846	VASH1
ITPKB|IP3-3KB|IP3K|IP3K-B|IP3KB|PIG37|-|1q42.12|protein-coding	1526.17	4.33334	0.29229	14.8255	1.00224e-49	2.25865e-47	3707	ITPKB
ZNF366|DCSCRIPT|-|5q13.2|5q13.2|protein-coding	292.267	6.42673	0.433976	14.809	1.28213e-49	2.85139e-47	167465	ZNF366
ACSL5|ACS2|ACS5|FACL5|-|10q25.2|protein-coding	265.43	4.99933	0.338403	14.7733	2.17715e-49	4.77899e-47	51703	ACSL5
CHST1|C6ST|GST-1|KS6ST|KSGal6ST|KSST|-|11p11.2|protein-coding	2064.96	5.93393	0.402096	14.7575	2.75243e-49	5.96431e-47	8534	CHST1
FGD5|ZFYVE23|-|3p25.1|protein-coding	1343.08	6.79884	0.464878	14.625	1.94518e-48	4.1617e-46	152273	FGD5
CD200|MOX1|MOX2|MRC|OX-2|-|3q13.2|protein-coding	185.008	6.98251	0.478132	14.6037	2.65909e-48	5.61799e-46	4345	CD200
ST3GAL6|SIAT10|ST3GALVI|-|3q12.1|protein-coding	172.006	7.24454	0.496338	14.596	2.97958e-48	6.21739e-46	10402	ST3GAL6
NOX4|KOX|KOX-1|RENOX|-|11q14.3|protein-coding	457.241	3.7291	0.2567	14.5271	8.15954e-48	1.68186e-45	50507	NOX4
SH3TC1|-|-|4p16.1|protein-coding	1147.78	6.31358	0.435727	14.4898	1.40598e-47	2.86311e-45	54436	SH3TC1
NPR1|ANPRA|ANPa|GUC2A|GUCY2A|NPRA|-|1q21.3|protein-coding	439.169	5.85813	0.405521	14.446	2.6582e-47	5.34868e-45	4881	NPR1
FZD4|CD344|EVR1|FEVR|FZD4S|Fz-4|Fz4|FzE4|GPCR|hFz4|-|11q14.2|protein-coding	1462.66	3.70049	0.256241	14.4414	2.83919e-47	5.64564e-45	8322	FZD4
SOX17|VUR3|-|8q11.23|protein-coding	177.95	6.18322	0.429607	14.3927	5.74913e-47	1.1299e-44	64321	SOX17
PCDH10|OL-PCDH|PCDH19|-|4q28.3|protein-coding	207.049	6.1936	0.431774	14.3445	1.15258e-46	2.23918e-44	57575	PCDH10
BMX|ETK|PSCTK2|PSCTK3|-|Xp22.2|protein-coding	348.468	6.7209	0.468582	14.3431	1.17745e-46	2.26151e-44	660	BMX
KIAA1211L|C2orf55|-|2q11.2|protein-coding	137.11	6.18802	0.431711	14.3337	1.34709e-46	2.55827e-44	343990	KIAA1211L
CACNG8|-|-|19q13.42|protein-coding	505.807	6.85037	0.479458	14.2877	2.61017e-46	4.9019e-44	59283	CACNG8
CRACR2B|EFCAB4A|-|11p15.5|protein-coding	161.291	5.09005	0.356345	14.2841	2.75108e-46	5.10976e-44	283229	CRACR2B
INPP5D|SHIP|SHIP-1|SHIP1|SIP-145|hp51CN|p150Ship|-|2q37.1|protein-coding	456.717	5.3306	0.373414	14.2753	3.11869e-46	5.72957e-44	3635	INPP5D
BCHE|CHE1|CHE2|E1|-|3q26.1|protein-coding	169.397	5.80928	0.407482	14.2565	4.08198e-46	7.41867e-44	590	BCHE
F11R|CD321|JAM|JAM1|JAMA|JCAM|KAT|PAM-1|-|1q23.3|protein-coding	1257.06	6.57077	0.462029	14.2216	6.73442e-46	1.21091e-43	50848	F11R
SPNS2|-|-|17p13.2|protein-coding	226.279	6.26928	0.441735	14.1924	1.02096e-45	1.81644e-43	124976	SPNS2
DOCK4|-|-|7q31.1|protein-coding	1278.39	4.26787	0.301896	14.1369	2.24981e-45	3.96108e-43	9732	DOCK4
SCNN1B|BESC1|ENaCb|ENaCbeta|SCNEB|-|16p12.2|protein-coding	347.772	6.98437	0.495566	14.0937	4.15025e-45	7.2317e-43	6338	SCNN1B
ST8SIA4|PST|PST1|SIAT8D|ST8SIA-IV|-|5q21.1|protein-coding	95.1173	4.79267	0.341741	14.0243	1.10738e-44	1.9099e-42	7903	ST8SIA4
ARHGEF15|ARGEF15|E5|Ephexin5|Vsm-RhoGEF|-|17p13.1|protein-coding	952.181	5.85498	0.421001	13.9073	5.72107e-44	9.76743e-42	22899	ARHGEF15
CLEC1A|CLEC-1|CLEC1|-|12p13.2|protein-coding	214.403	5.07658	0.367937	13.7974	2.64202e-43	4.46554e-41	51267	CLEC1A
NRARP|-|-|9q34.3|protein-coding	513.662	5.39035	0.391577	13.7658	4.09583e-43	6.85422e-41	441478	NRARP
SHE|-|-|1q21.3|protein-coding	472.81	6.6131	0.482745	13.699	1.0298e-42	1.70644e-40	126669	SHE
NBEAL2|BDPLT4|GPS|-|3p21.31|protein-coding	1020.89	2.88869	0.21156	13.6542	1.90509e-42	3.12619e-40	23218	NBEAL2
KANK3|ANKRD47|-|19p13.2|protein-coding	1027.29	6.55993	0.480692	13.6468	2.10824e-42	3.42629e-40	256949	KANK3
PDE2A|CGS-PDE|PDE2A1|PED2A4|cGSPDE|-|11q13.4|protein-coding	1202.52	6.22098	0.456564	13.6257	2.81847e-42	4.53693e-40	5138	PDE2A
RASGRP3|GRP3|-|2p22.3|protein-coding	706.368	3.36745	0.247465	13.6078	3.60103e-42	5.74195e-40	25780	RASGRP3
TNFAIP8L1|TIPE1|-|19p13.3|protein-coding	1645.32	4.17865	0.307259	13.5997	4.01878e-42	6.34818e-40	126282	TNFAIP8L1
NRROS|ELLP3030|GARPL1|LRRC33|UNQ3030|-|3q29|protein-coding	134.505	5.05944	0.372492	13.5827	5.07224e-42	7.93806e-40	375387	NRROS
RHPN1|ODF5|RHOPHILIN|RHPN|-|8q24.3|protein-coding	180.443	5.70928	0.420509	13.5771	5.47756e-42	8.49373e-40	114822	RHPN1
CBX2|CDCA6|M33|SRXY5|-|17q25.3|protein-coding	174.441	4.24018	0.313427	13.5284	1.06262e-41	1.63276e-39	84733	CBX2
CHD7|CRG|HH5|IS3|KAL5|-|8q12.2|protein-coding	478.228	3.83302	0.283784	13.5068	1.4251e-41	2.17001e-39	55636	CHD7
ICAM2|CD102|-|17q23.3|protein-coding	1440.01	6.7277	0.498946	13.4838	1.94755e-41	2.93906e-39	3384	ICAM2
CCNJL|-|-|5q33.3|protein-coding	96.5127	5.95537	0.44269	13.4527	2.96855e-41	4.44021e-39	79616	CCNJL
ARVCF|-|-|22q11.21|protein-coding	573.187	4.17403	0.310317	13.4509	3.04229e-41	4.5106e-39	421	ARVCF
SHROOM4|SHAP|-|Xp11.22|protein-coding	819.02	3.47668	0.2593	13.408	5.43104e-41	7.98222e-39	57477	SHROOM4
CFAP54|C12orf55|C12orf63|-|12q23.1|protein-coding	251.782	4.67031	0.34886	13.3874	7.16817e-41	1.04445e-38	144535	CFAP54
ALPK3|MAK|MIDORI|-|15q25.3|protein-coding	524.302	5.25674	0.393356	13.3638	9.84008e-41	1.42151e-38	57538	ALPK3
ECSCR|ARIA|ECSM2|-|5q31.2|protein-coding	679.347	6.62998	0.497924	13.3153	1.88704e-40	2.70295e-38	641700	ECSCR
GPSM3|AGS4|C6orf9|G18|G18.1a|G18.1b|G18.2|NG1|-|6p21.32|protein-coding	204.024	2.14537	0.161219	13.3072	2.1016e-40	2.98498e-38	63940	GPSM3
MANSC1|9130403P13Rik|LOH12CR3|-|12p13.2|protein-coding	416.049	3.64811	0.274328	13.2983	2.36687e-40	3.33373e-38	54682	MANSC1
RAPGEF5|GFR|MR-GEF|REPAC|-|7p15.3|protein-coding	2202.23	5.96009	0.448659	13.2842	2.85721e-40	3.99112e-38	9771	RAPGEF5
GPR146|PGR8|-|7p22.3|protein-coding	390.282	4.99907	0.376665	13.272	3.36703e-40	4.66472e-38	115330	GPR146
CDH5|7B4|CD144|-|16q21|protein-coding	6280.57	6.69518	0.505666	13.2403	5.13329e-40	7.05389e-38	1003	CDH5
PLVAP|FELS|PV-1|PV1|gp68|-|19p13.11|protein-coding	638.814	6.59634	0.499923	13.1947	9.4117e-40	1.27528e-37	83483	PLVAP
JUP|ARVD12|CTNNG|DP3|DPIII|PDGB|PKGB|-|17q21.2|protein-coding	3279.04	5.80197	0.439725	13.1946	9.43142e-40	1.27528e-37	3728	JUP
LAPTM5|CLAST6|-|1p35.2|protein-coding	921.743	6.06878	0.461363	13.154	1.61375e-39	2.16473e-37	7805	LAPTM5
SNCA|NACP|PARK1|PARK4|PD1|-|4q22.1|protein-coding	246.117	6.71044	0.51134	13.1232	2.42402e-39	3.22605e-37	6622	SNCA
KLHL3|PHA2D|-|5q31.2|protein-coding	434.36	4.49022	0.342599	13.1063	3.02838e-39	3.99888e-37	26249	KLHL3
ABCG1|ABC8|WHITE1|-|21q22.3|protein-coding	653.121	6.59096	0.504417	13.0665	5.1171e-39	6.70459e-37	9619	ABCG1
GDPD5|GDE2|PP1665|-|11q13.4-q13.5|protein-coding	553.991	2.98142	0.228619	13.041	7.15292e-39	9.2999e-37	81544	GDPD5
DMTN|DMT|EPB49|-|8p21.3|protein-coding	166.839	4.82479	0.372049	12.9682	1.85421e-38	2.39235e-36	2039	DMTN
EPB41L4A|EPB41L4|NBL4|-|5q22.1-q22.2|protein-coding	183.908	6.04891	0.467958	12.9262	3.20327e-38	4.10164e-36	64097	EPB41L4A
ERG|erg-3|p55|-|21q22.2|protein-coding	1357.62	6.20497	0.480652	12.9095	3.98e-38	5.05789e-36	2078	ERG
RPS6KL1|RSKL2|-|14q24.3|protein-coding	165.421	5.76542	0.446861	12.902	4.38301e-38	5.52848e-36	83694	RPS6KL1
PXDN|COPOA|D2S448|D2S448E|MG50|PRG2|PXN|VPO|-|2p25.3|protein-coding	15766.5	2.85222	0.221186	12.8951	4.79382e-38	6.00186e-36	7837	PXDN
LINC01235|-|-|9p23|ncRNA	105.923	6.89495	0.534968	12.8885	5.2234e-38	6.49161e-36	401492	LINC01235
PPP1R13B|ASPP1|p53BP2-like|p85|-|14q32.33|protein-coding	472.018	3.80047	0.295269	12.8712	6.53959e-38	8.06804e-36	23368	PPP1R13B
MERTK|MER|RP38|Tyro12|c-Eyk|c-mer|-|2q13|protein-coding	171.329	6.22376	0.485245	12.826	1.17263e-37	1.43622e-35	10461	MERTK
MAML3|CAGH3|ERDA3|GDN|MAM-2|MAM2|TNRC3|-|4q31.1|protein-coding	372.977	2.30034	0.179445	12.8192	1.27934e-37	1.55564e-35	55534	MAML3
PTPRE|HPTPE|PTPE|R-PTP-EPSILON|-|10q26.2|protein-coding	921.178	4.44567	0.346824	12.8182	1.29654e-37	1.56529e-35	5791	PTPRE
LOC643733|-|-|11q22.3|pseudo	91.0368	4.8432	0.378975	12.7797	2.12766e-37	2.55048e-35	643733	LOC643733
C8orf4|TC-1|TC1|-|8p11.21|protein-coding	591.928	3.9482	0.309773	12.7455	3.30462e-37	3.93343e-35	56892	C8orf4
ARHGAP45|HA-1|HLA-HA1|HMHA1|-|19p13.3|protein-coding	69.4504	3.57494	0.280787	12.7319	3.93398e-37	4.6498e-35	23526	ARHGAP45
CLDN5|AWAL|BEC1|CPETRL1|TMVCF|-|22q11.21|protein-coding	4045.06	7.06589	0.557567	12.6727	8.3765e-37	9.83192e-35	7122	CLDN5
TIE1|JTK14|TIE|-|1p34.2|protein-coding	3805.59	6.65988	0.527062	12.6358	1.33942e-36	1.56131e-34	7075	TIE1
CORO7|0610011B16Rik|CRN7|POD1|-|16p13.3|protein-coding	582.993	2.04076	0.16183	12.6105	1.84798e-36	2.13935e-34	79585	CORO7
KIAA1671|-|-|22q11.23|protein-coding	1132.45	4.36677	0.34752	12.5655	3.26704e-36	3.75643e-34	85379	KIAA1671
APBA2|D15S1518E|HsT16821|LIN-10|MGC:14091|MINT2|X11-BETA|X11L|-|15q13.1|protein-coding	187.452	4.40451	0.350841	12.5541	3.77326e-36	4.30917e-34	321	APBA2
ARHGAP25|HEL-S-308|KAIA0053|-|2p13.3|protein-coding	200.66	6.80517	0.543285	12.526	5.38214e-36	6.1053e-34	9938	ARHGAP25
THSD7A|-|-|7p21.3|protein-coding	324.833	5.05921	0.404588	12.5046	7.04675e-36	7.94028e-34	221981	THSD7A
ADORA2A|A2aR|ADORA2|RDC8|-|22q11.23|protein-coding	161.872	4.52723	0.363358	12.4594	1.24255e-35	1.39084e-33	135	ADORA2A
CPNE5|COPN5|CPN5|-|6p21.2|protein-coding	204.138	6.78241	0.544481	12.4566	1.2868e-35	1.43089e-33	57699	CPNE5
NOL4L|C20orf112|C20orf113|dJ1184F4.2|dJ1184F4.4|-|20q11.21|protein-coding	570.679	3.05413	0.245689	12.4309	1.77611e-35	1.94934e-33	140688	NOL4L
LPCAT2|AGPAT11|AYTL1|LysoPAFAT|-|16q12.2|protein-coding	741.067	2.78011	0.223637	12.4313	1.76694e-35	1.94934e-33	54947	LPCAT2
RHOJ|ARHJ|RASL7B|TC10B|TCL|-|14q23.2|protein-coding	1663.76	4.26475	0.343267	12.424	1.93642e-35	2.11157e-33	57381	RHOJ
ARHGEF7|BETA-PIX|COOL-1|COOL1|Nbla10314|P50|P50BP|P85|P85COOL1|P85SPR|PAK3|PIXB|-|13q34|protein-coding	2605.46	1.87472	0.151322	12.389	2.99789e-35	3.2481e-33	8874	ARHGEF7
GFOD1|ADG-90|C6orf114|-|6p24.1-p23|protein-coding	175.922	4.76596	0.385324	12.3687	3.85957e-35	4.15506e-33	54438	GFOD1
TNFRSF4|ACT35|CD134|IMD16|OX40|TXGP1L|-|1p36.33|protein-coding	118.207	6.25375	0.509842	12.266	1.3782e-34	1.47432e-32	7293	TNFRSF4
PGF|D12S1900|PGFL|PIGF|PLGF|PlGF-2|SHGC-10760|-|14q24.3|protein-coding	5158.11	4.81084	0.39226	12.2644	1.40603e-34	1.48529e-32	5228	PGF
FAM69B|C9orf136|pp6977|-|9q34.3|protein-coding	676.662	6.55988	0.534867	12.2645	1.40452e-34	1.48529e-32	138311	FAM69B
EXOC6|EXOC6A|SEC15|SEC15L|SEC15L1|SEC15L3|Sec15p|-|10q23.33|protein-coding	322.406	4.26367	0.347895	12.2556	1.56749e-34	1.64557e-32	54536	EXOC6
MTUS1|ATBP|ATIP|ICIS|MP44|MTSG1|-|8p22|protein-coding	1314.09	4.88723	0.398872	12.2526	1.62686e-34	1.69736e-32	57509	MTUS1
MFNG|-|-|22q13.1|protein-coding	592.717	7.00547	0.571956	12.2483	1.71647e-34	1.77987e-32	4242	MFNG
TAL1|SCL|TCL5|bHLHa17|tal-1|-|1p33|protein-coding	326.198	6.53706	0.540434	12.0959	1.10957e-33	1.14353e-31	6886	TAL1
PIM3|pim-3|-|22q13.33|protein-coding	1370.5	3.14816	0.260405	12.0895	1.20062e-33	1.22987e-31	415116	PIM3
ANGPT2|AGPT2|ANG2|-|8p23.1|protein-coding	2560.81	6.79486	0.562158	12.0871	1.23562e-33	1.2581e-31	285	ANGPT2
AFAP1L1|-|-|5q32|protein-coding	3334.49	3.97666	0.329238	12.0784	1.37399e-33	1.39061e-31	134265	AFAP1L1
CCL14|CC-1|CC-3|CKB1|HCC-1|HCC-1(1-74)|HCC-1/HCC-3|HCC-3|MCIF|NCC-2|NCC2|SCYA14|SCYL2|SY14|-|17q12|protein-coding	223.922	6.97931	0.578505	12.0644	1.62886e-33	1.63875e-31	6358	CCL14
CCL15-CCL14|-|-|17q12|ncRNA	223.589	6.97714	0.578443	12.0619	1.67799e-33	1.67819e-31	348249	CCL15-CCL14
MYZAP|GCOM1|Gup|MYOZAP|-|15q21.3|protein-coding	812.811	6.81885	0.567365	12.0184	2.84277e-33	2.82639e-31	100820829	MYZAP
RBM38|HSRNASEB|RNPC1|SEB4B|SEB4D|dJ800J21.2|-|20q13.31|protein-coding	371.899	2.75077	0.228933	12.0156	2.94119e-33	2.90713e-31	55544	RBM38
RALGAPA2|AS250|C20orf74|bA287B20.1|dJ1049G11|dJ1049G11.4|p220|-|20p11.23|protein-coding	495.911	2.69259	0.224101	12.0151	2.96122e-33	2.90992e-31	57186	RALGAPA2
TSPAN12|EVR5|NET-2|NET2|TM4SF12|-|7q31.31|protein-coding	102.027	4.43805	0.370704	11.9719	4.98438e-33	4.86971e-31	23554	TSPAN12
HOPX|CAMEO|HOD|HOP|LAGY|NECC1|OB1|SMAP31|TOTO|-|4q12|protein-coding	185.485	5.55484	0.464147	11.9678	5.23768e-33	5.08778e-31	84525	HOPX
ENTPD1|ATPDase|CD39|NTPDase-1|SPG64|-|10q24.1|protein-coding	90.5977	4.47446	0.373986	11.9642	5.47067e-33	5.28373e-31	953	ENTPD1
DNMT3A|DNMT3A2|M.HsaIIIA|TBRS|-|2p23.3|protein-coding	277.79	1.75707	0.146985	11.9541	6.17891e-33	5.93386e-31	1788	DNMT3A
LINC00176|NCRNA00176|PRR17|-|20q13.33|protein-coding	63.9291	4.61592	0.386456	11.9443	6.95736e-33	6.64369e-31	284739	LINC00176
PIK3CG|PI3CG|PI3K|PI3Kgamma|PIK3|p110gamma|p120-PI3K|-|7q22.3|protein-coding	92.4979	6.69118	0.560324	11.9416	7.17928e-33	6.81709e-31	5294	PIK3CG
INSR|CD220|HHF5|-|19p13.2|protein-coding	2009.19	2.98517	0.250169	11.9326	8.00437e-33	7.55809e-31	3643	INSR
C10orf10|DEPP|FIG|Fseg|-|10q11.21|protein-coding	3790.95	4.33015	0.363413	11.9152	9.85883e-33	9.25744e-31	11067	C10orf10
MCAM|CD146|MUC18|-|11q23.3|protein-coding	8728.08	4.51692	0.382574	11.8067	3.60645e-32	3.36775e-30	4162	MCAM
LRRC70|SLRN|-|5q12.1|protein-coding	109.161	5.37035	0.455479	11.7906	4.36653e-32	4.05511e-30	100130733	LRRC70
PCSK6|PACE4|SPC4|-|15q26.3|protein-coding	314.728	5.20302	0.443057	11.7435	7.62982e-32	7.04695e-30	5046	PCSK6
FRMD4B|6030440G05Rik|GRSP1|-|3p14.1|protein-coding	523.355	5.1705	0.441554	11.7098	1.13598e-31	1.0435e-29	23150	FRMD4B
LXN|ECI|TCI|-|3q25.32|protein-coding	932.43	5.77305	0.493215	11.7049	1.20238e-31	1.09852e-29	56925	LXN
NFIA-AS2|-|-|1p31.3|ncRNA	84.391	6.85178	0.585984	11.6928	1.38776e-31	1.26107e-29	100996570	NFIA-AS2
PTPRB|HPTP-BETA|HPTPB|PTPB|R-PTP-BETA|VEPTP|-|12q15|protein-coding	1410.44	5.5861	0.478471	11.6749	1.71262e-31	1.54795e-29	5787	PTPRB
SMAD1|BSP-1|BSP1|JV4-1|JV41|MADH1|MADR1|-|4q31.21|protein-coding	1336.23	3.61907	0.310302	11.6631	1.96826e-31	1.76955e-29	4086	SMAD1
KIAA1147|LCHN|PRO2561|-|7q34|protein-coding	766.929	2.47208	0.2127	11.6223	3.17301e-31	2.83758e-29	57189	KIAA1147
TMEM255B|FAM70B|-|13q34|protein-coding	259.584	4.64593	0.400267	11.6071	3.79331e-31	3.37445e-29	348013	TMEM255B
SEMA3F|SEMA-IV|SEMA4|SEMAK|-|3p21.31|protein-coding	1624.82	3.88082	0.334413	11.6049	3.89243e-31	3.44449e-29	6405	SEMA3F
UNC5A|UNC5H1|-|5q35.2|protein-coding	214.114	7.2763	0.628465	11.5779	5.33364e-31	4.69527e-29	90249	UNC5A
ST6GALNAC3|PRO7177|SIAT7C|ST6GALNACIII|STY|-|1p31.1|protein-coding	311.537	6.77144	0.585579	11.5637	6.29562e-31	5.51339e-29	256435	ST6GALNAC3
SIPA1L2|SPAL2|-|1q42.2|protein-coding	1023.3	4.63277	0.400722	11.5611	6.49063e-31	5.65488e-29	57568	SIPA1L2
S1PR1|CD363|CHEDG1|D1S3362|ECGF1|EDG-1|EDG1|S1P1|-|1p21.2|protein-coding	1709.07	4.19781	0.36353	11.5473	7.61417e-31	6.59973e-29	1901	S1PR1
CTSH|ACC-4|ACC-5|ACC4|ACC5|CPSB|-|15q25.1|protein-coding	122.377	4.74619	0.412163	11.5153	1.10441e-30	9.52387e-29	1512	CTSH
KDR|CD309|FLK1|VEGFR|VEGFR2|-|4q12|protein-coding	4590.72	6.62219	0.57511	11.5146	1.11317e-30	9.5507e-29	3791	KDR
DAPK1|DAPK|-|9q21.33|protein-coding	352.514	5.12165	0.446498	11.4707	1.85139e-30	1.58041e-28	1612	DAPK1
CARD8|CARDINAL|DACAR|DAKAR|NDPP|NDPP1|TUCAN|-|19q13.33|protein-coding	1086.28	2.58743	0.22565	11.4665	1.94268e-30	1.65001e-28	22900	CARD8
MARCKSL1|F52|MACMARCKS|MLP|MLP1|MRP|-|1p35.1|protein-coding	1815.91	3.34431	0.291735	11.4635	2.01102e-30	1.69951e-28	65108	MARCKSL1
COL9A3|DJ885L7.4.1|EDM3|IDD|MED|-|20q13.33|protein-coding	154.197	5.86184	0.511988	11.4492	2.3737e-30	1.99603e-28	1299	COL9A3
TTC13|-|-|1q42.2|protein-coding	481.256	1.7839	0.15678	11.3783	5.36258e-30	4.48705e-28	79573	TTC13
MECOM|AML1-EVI-1|EVI1|KMT8E|MDS1|MDS1-EVI1|PRDM3|RUSAT2|-|3q26.2|protein-coding	1053.1	4.56881	0.401874	11.3688	5.98274e-30	4.9813e-28	2122	MECOM
PLD1|-|-|3q26.31|protein-coding	611.216	4.00208	0.352895	11.3407	8.2461e-30	6.83214e-28	5337	PLD1
PCAT19|LINC01190|-|19q13.2|ncRNA	312.831	6.49461	0.573389	11.3267	9.67703e-30	7.97859e-28	100505495	PCAT19
NUDT14|UGPP|UGPPase|-|14q32.33|protein-coding	189.272	3.08823	0.273637	11.2859	1.54106e-29	1.26442e-27	256281	NUDT14
GIMAP6|IAN-2|IAN-6|IAN2|IAN6|-|7q36.1|protein-coding	901.571	6.55737	0.58116	11.2832	1.58771e-29	1.2964e-27	474344	GIMAP6
ARAP3|CENTD3|DRAG1|-|5q31.3|protein-coding	1133.31	2.98873	0.266123	11.2306	2.88358e-29	2.34319e-27	64411	ARAP3
FABP4|A-FABP|AFABP|ALBP|HEL-S-104|aP2|-|8q21.13|protein-coding	468.389	6.53772	0.582819	11.2174	3.34946e-29	2.70874e-27	2167	FABP4
ZDHHC14|NEW1CP|-|6q25.3|protein-coding	292.488	2.77185	0.247171	11.2143	3.46887e-29	2.79195e-27	79683	ZDHHC14
IQCJ-SCHIP1|-|-|3q25.32-q25.33|protein-coding	630.272	2.93557	0.261881	11.2096	3.66009e-29	2.93189e-27	100505385	IQCJ-SCHIP1
SCHIP1|SCHIP-1|-|3q25.32-q25.33|protein-coding	629.632	2.94639	0.262931	11.2059	3.8131e-29	3.04005e-27	29970	SCHIP1
SEC14L1|PRELID4A|SEC14L|-|17q25.2-q25.3|protein-coding	3958.46	2.34031	0.208952	11.2002	4.0672e-29	3.22741e-27	6397	SEC14L1
FRMD8|FKSG44|-|11q13.1|protein-coding	1203.36	1.31438	0.117369	11.1987	4.13608e-29	3.26673e-27	83786	FRMD8
AGFG2|HRBL|RABR|-|7q22.1|protein-coding	423.7	2.55476	0.228401	11.1854	4.80659e-29	3.77865e-27	3268	AGFG2
MYEF2|HsT18564|MEF-2|MST156|MSTP156|myEF-2|-|15q21.1|protein-coding	271.158	3.27818	0.293191	11.1811	5.04848e-29	3.95044e-27	50804	MYEF2
MPZL2|EVA|EVA1|-|11q23.3|protein-coding	387.923	6.98054	0.624544	11.177	5.28368e-29	4.11543e-27	10205	MPZL2
MYCT1|MTLC|-|6q25.2|protein-coding	1007.21	6.89347	0.618524	11.145	7.57182e-29	5.87059e-27	80177	MYCT1
GIMAP1|HIMAP1|IAN2|IMAP1|IMAP38|-|7q36.1|protein-coding	311.787	6.55483	0.588267	11.1426	7.78037e-29	6.00474e-27	170575	GIMAP1
CREM|CREM-2|ICER|hCREM-2|-|10p11.21|protein-coding	481.216	2.42905	0.218771	11.1031	1.21108e-28	9.30436e-27	1390	CREM
WFS1|CTRCT41|WFRS|WFS|WFSL|-|4p16.1|protein-coding	2937.06	3.30667	0.297834	11.1024	1.22106e-28	9.33864e-27	7466	WFS1
NOTCH1|AOS5|AOVD1|TAN1|hN1|-|9q34.3|protein-coding	2031.81	3.04863	0.277148	11	3.82071e-28	2.9089e-26	4851	NOTCH1
GRK5|GPRK5|-|10q26.11|protein-coding	1021.87	2.2688	0.206898	10.9658	5.57973e-28	4.22908e-26	2869	GRK5
PRKAR2B|PRKAR2|RII-BETA|-|7q22.3|protein-coding	416.495	4.64688	0.424086	10.9574	6.12319e-28	4.62027e-26	5577	PRKAR2B
CREG2|-|-|2q11.2|protein-coding	34.9731	4.3688	0.399211	10.9436	7.13148e-28	5.35717e-26	200407	CREG2
EFCAB14|KIAA0494|-|1p33|protein-coding	3821.97	2.206	0.201905	10.9259	8.66485e-28	6.48024e-26	9813	EFCAB14
HHEX|HEX|HMPH|HOX11L-PEN|PRH|PRHX|-|10q23.33|protein-coding	367.426	5.57522	0.511136	10.9075	1.0613e-27	7.90221e-26	3087	HHEX
CMTM8|CKLFSF8|CKLFSF8-V2|-|3p22.3|protein-coding	63.5405	3.7657	0.348237	10.8136	2.96786e-27	2.20012e-25	152189	CMTM8
LHX6|LHX6.1|-|9q33.2|protein-coding	140.362	6.30401	0.583865	10.797	3.55479e-27	2.62371e-25	26468	LHX6
C2CD4B|FAM148B|NLF2|-|15q22.2|protein-coding	89.6463	6.93893	0.643443	10.7841	4.09376e-27	3.00838e-25	388125	C2CD4B
CHST15|BRAG|GALNAC4S-6ST|-|10q26.13|protein-coding	1212.15	4.68261	0.435048	10.7634	5.12323e-27	3.74861e-25	51363	CHST15
SOX7|-|-|8p23.1|protein-coding	603.995	6.05378	0.565372	10.7076	9.37621e-27	6.83089e-25	83595	SOX7
PLEKHG5|CMTRIC|DSMA4|GEF720|Syx|Tech|-|1p36.31|protein-coding	1027.53	3.03199	0.283315	10.7018	9.97928e-27	7.23905e-25	57449	PLEKHG5
RHBDF2|RHBDL5|RHBDL6|TEC|TOC|TOCG|iRhom2|-|17q25.1|protein-coding	642.821	2.4933	0.234655	10.6254	2.27042e-26	1.63994e-24	79651	RHBDF2
PDE10A|ADSD2|HSPDE10A|IOLOD|LINC00473|PDE10A19|-|6q27|protein-coding	81.773	5.04982	0.477042	10.5857	3.47219e-26	2.49732e-24	10846	PDE10A
PPM1F|CAMKP|CaMKPase|FEM-2|POPX2|hFEM-2|-|22q11.22|protein-coding	3404.72	2.1972	0.207952	10.5659	4.28748e-26	3.07063e-24	9647	PPM1F
SYNGR2|-|-|17q25.3|protein-coding	589.753	3.73092	0.353211	10.5628	4.43027e-26	3.15951e-24	9144	SYNGR2
MPZL3|-|-|11q23.3|protein-coding	56.2295	6.63067	0.629723	10.5295	6.31717e-26	4.48625e-24	196264	MPZL3
KLHL4|DKELCHL|KHL4|-|Xq21.31|protein-coding	79.2242	5.32649	0.508027	10.4847	1.01613e-25	7.18602e-24	56062	KLHL4
KIF17|KIF17B|KIF3X|KLP-2|OSM-3|-|1p36.12|protein-coding	81.5332	3.83377	0.365893	10.4778	1.09205e-25	7.69075e-24	57576	KIF17
FAM189A2|C9orf61|X123|-|9q21.12|protein-coding	65.4112	7.07216	0.67573	10.466	1.23821e-25	8.68393e-24	9413	FAM189A2
TNFRSF25|APO-3|DDR3|DR3|LARD|TNFRSF12|TR3|TRAMP|WSL-1|WSL-LR|-|1p36.31|protein-coding	283.159	3.46098	0.331252	10.4482	1.49377e-25	1.0433e-23	8718	TNFRSF25
MAP3K11|MEKK11|MLK-3|MLK3|PTK1|SPRK|-|11q13.1|protein-coding	1491.44	2.26507	0.216943	10.4409	1.61342e-25	1.12222e-23	4296	MAP3K11
GIMAP7|IAN7|hIAN7|-|7q36.1|protein-coding	185.93	6.47062	0.624609	10.3595	3.79042e-25	2.62564e-23	168537	GIMAP7
CASP10|ALPS2|FLICE2|MCH4|-|2q33.1|protein-coding	573.435	3.43519	0.331739	10.3551	3.96896e-25	2.7381e-23	843	CASP10
GRB10|GRB-IR|Grb-10|IRBP|MEG1|RSS|-|7p12.1|protein-coding	1894.37	2.338	0.226408	10.3265	5.34962e-25	3.67558e-23	2887	GRB10
MGST2|GST2|MGST-II|-|4q31.1|protein-coding	477.044	2.89161	0.280143	10.3219	5.60994e-25	3.83883e-23	4258	MGST2
FAM49A|-|-|2p24.2|protein-coding	422.45	3.97926	0.385693	10.3172	5.8935e-25	4.01661e-23	81553	FAM49A
GIMAP4|IAN-1|IAN1|IMAP4|MSTP062|-|7q36.1|protein-coding	503.614	6.94872	0.674122	10.3078	6.49695e-25	4.4101e-23	55303	GIMAP4
SNRK|HSNFRK|-|3p22.1|protein-coding	1443.66	2.80065	0.272212	10.2885	7.94014e-25	5.36817e-23	54861	SNRK
KIAA0040|-|-|1q25.1|protein-coding	263.452	4.62965	0.450658	10.2731	9.31792e-25	6.27456e-23	9674	KIAA0040
ADGRG1|BFPP|BPPR|GPR56|TM7LN4|TM7XN1|-|16q21|protein-coding	429.059	5.84541	0.569179	10.2699	9.63026e-25	6.45915e-23	9289	ADGRG1
DOK3|DOKL|-|5q35.3|protein-coding	151.114	4.19755	0.40887	10.2662	1.00045e-24	6.68366e-23	79930	DOK3
DOCK8|HEL-205|MRD2|ZIR8|-|9p24.3|protein-coding	111.145	6.82695	0.668464	10.2129	1.73599e-24	1.15519e-22	81704	DOCK8
EPOR|EPO-R|-|19p13.2|protein-coding	320.894	3.00337	0.295831	10.1523	3.23595e-24	2.14486e-22	2057	EPOR
OSBPL10|ORP10|OSBP9|-|3p23|protein-coding	813.709	3.67604	0.362592	10.1382	3.73751e-24	2.46763e-22	114884	OSBPL10
FUT1|H|HH|HSC|-|19q13.33|protein-coding	50.8511	6.28379	0.620364	10.1292	4.1001e-24	2.69649e-22	2523	FUT1
TBC1D30|-|-|12q14.3|protein-coding	67.0335	3.23788	0.320087	10.1156	4.71038e-24	3.08585e-22	23329	TBC1D30
RAPGEF4|CAMP-GEFII|CGEF2|EPAC|EPAC 2|EPAC2|Nbla00496|-|2q31.1|protein-coding	144.512	3.97991	0.393459	10.1152	4.73139e-24	3.08765e-22	11069	RAPGEF4
GCNT2|CCAT|CTRCT13|GCNT2C|GCNT5|IGNT|II|NACGT1|NAGCT1|ULG3|bA360O19.2|bA421M1.1|-|6p24.3-p24.2|protein-coding	47.421	5.72418	0.57034	10.0364	1.05421e-23	6.85318e-22	2651	GCNT2
TEK|CD202B|TIE-2|TIE2|VMCM|VMCM1|-|9p21.2|protein-coding	796.628	4.6884	0.467526	10.0281	1.14701e-23	7.42789e-22	7010	TEK
KALRN|ARHGEF24|CHD5|CHDS5|DUET|DUO|HAPIP|TRAD|-|3q21.1-q21.2|protein-coding	456.917	3.70949	0.372515	9.95794	2.32841e-23	1.50209e-21	8997	KALRN
BMP2|BDA2|BMP2A|-|20p12.3|protein-coding	263.352	5.28382	0.530758	9.95523	2.39257e-23	1.53761e-21	650	BMP2
ATP11A|ATPIH|ATPIS|-|13q34|protein-coding	1880.13	2.55003	0.256937	9.92472	3.25021e-23	2.08087e-21	23250	ATP11A
TPD52|D52|N8L|PC-1|PrLZ|hD52|-|8q21.13|protein-coding	80.4288	6.95865	0.702954	9.89915	4.19816e-23	2.67763e-21	7163	TPD52
GIMAP1-GIMAP5|-|-|7q36.1|protein-coding	673.807	6.53679	0.663526	9.85159	6.74655e-23	4.28685e-21	100527949	GIMAP1-GIMAP5
IL32|IL-32alpha|IL-32beta|IL-32delta|IL-32gamma|NK4|TAIF|TAIFa|TAIFb|TAIFc|TAIFd|-|16p13.3|protein-coding	518.654	4.8478	0.492218	9.84889	6.9307e-23	4.38737e-21	9235	IL32
TECPR1|-|-|7q21.3|protein-coding	980.985	1.89637	0.192897	9.83099	8.27974e-23	5.2218e-21	25851	TECPR1
GPRC5B|RAIG-2|RAIG2|-|16p12.3|protein-coding	505.173	4.3173	0.439995	9.81218	9.97928e-23	6.27025e-21	51704	GPRC5B
GIMAP8|IAN-9|IAN6|IAN9|IANT|-|7q36.1|protein-coding	827.04	6.53039	0.665999	9.80539	1.06729e-22	6.68126e-21	155038	GIMAP8
PROX1|-|-|1q32.3|protein-coding	74.5962	4.31905	0.440918	9.79559	1.17611e-22	7.33525e-21	5629	PROX1
SDPR|CAVIN2|PS-p68|SDR|cavin-2|-|2q32.3|protein-coding	961.102	4.10253	0.418892	9.79378	1.19738e-22	7.44047e-21	8436	SDPR
HOXD1|HOX4|HOX4G|Hox-4.7|-|2q31.1|protein-coding	104.786	4.16631	0.426301	9.77317	1.4679e-22	9.08809e-21	3231	HOXD1
MACF1|ABP620|ACF7|MACF|OFC4|-|1p34.3|protein-coding	7598.27	1.03244	0.105715	9.76624	1.57172e-22	9.69534e-21	23499	MACF1
MEX3B|MEX-3B|RKHD3|RNF195|-|15q25.2|protein-coding	307.691	2.15677	0.221667	9.72977	2.25096e-22	1.38348e-20	84206	MEX3B
PHF10|BAF45A|XAP135|-|6q27|protein-coding	579.441	2.21433	0.227743	9.72294	2.40719e-22	1.47414e-20	55274	PHF10
AATK|AATYK|AATYK1|LMR1|LMTK1|PPP1R77|p35BP|-|17q25.3|protein-coding	75.7184	4.68243	0.48214	9.71176	2.68666e-22	1.63935e-20	9625	AATK
SLC12A2|BSC|BSC2|NKCC1|PPP1R141|-|5q23.3|protein-coding	1354.4	2.98374	0.308166	9.68226	3.58702e-22	2.18086e-20	6558	SLC12A2
PLXND1|PLEXD1|-|3q22.1|protein-coding	9581.58	1.93315	0.199979	9.66676	4.17378e-22	2.5285e-20	23129	PLXND1
YPEL1|FKSG3|-|22q11.21-q11.22|protein-coding	148.739	3.74435	0.38762	9.65984	4.46544e-22	2.69553e-20	29799	YPEL1
KIAA1551|C12orf35|UTA2-1|-|12p11.21|protein-coding	1559.8	2.96695	0.307698	9.64239	5.29384e-22	3.18422e-20	55196	KIAA1551
SERPINB9|CAP-3|CAP3|PI-9|PI9|-|6p25.2|protein-coding	310.541	4.4965	0.467241	9.62351	6.36252e-22	3.81345e-20	5272	SERPINB9
SLCO2B1|OATP-B|OATP2B1|OATPB|SLC21A9|-|11q13.4|protein-coding	217.084	7.70835	0.80287	9.601	7.91711e-22	4.72845e-20	11309	SLCO2B1
MMP15|MMP-15|MT2-MMP|MT2MMP|MTMMP2|SMCP-2|-|16q21|protein-coding	303.834	4.46465	0.465101	9.59931	8.04786e-22	4.78961e-20	4324	MMP15
GIMAP5|HIMAP3|IAN-5|IAN4|IAN4L1|IAN5|IMAP3|IROD|-|7q36.1|protein-coding	603.569	6.56885	0.68519	9.58691	9.07658e-22	5.38289e-20	55340	GIMAP5
GIPC3|C19orf64|DFNB15|DFNB72|DFNB95|-|19p13.3|protein-coding	232.379	3.88085	0.405517	9.57014	1.06763e-21	6.30946e-20	126326	GIPC3
ECE1|ECE|-|1p36.12|protein-coding	10226.1	1.43108	0.1502	9.52786	1.60561e-21	9.45577e-20	1889	ECE1
CALCRL|CGRPR|CRLR|-|2q32.1|protein-coding	1146.34	3.53485	0.371364	9.51857	1.75581e-21	1.03044e-19	10203	CALCRL
PEAR1|JEDI|MEGF12|-|1q23.1|protein-coding	1094.56	4.0948	0.430878	9.50338	2.03194e-21	1.18837e-19	375033	PEAR1
FILIP1|FILIP|-|6q14.1|protein-coding	369.555	5.2148	0.549733	9.48607	2.39917e-21	1.3983e-19	27145	FILIP1
ARHGAP27P1|-|-|17q24.1|pseudo	361.599	2.00052	0.211033	9.47966	2.55116e-21	1.48178e-19	146880	ARHGAP27P1
ZNF792|-|-|19q13.11|protein-coding	139.172	2.80647	0.296329	9.47079	2.77741e-21	1.60766e-19	126375	ZNF792
HIP1R|HIP12|HIP3|ILWEQ|-|12q24.31|protein-coding	1047.04	2.13571	0.225751	9.46046	3.0659e-21	1.7686e-19	9026	HIP1R
PRND|DOPPEL|DPL|PrPLP|dJ1068H6.4|-|20p13|protein-coding	128.776	6.38449	0.675516	9.45129	3.34694e-21	1.92415e-19	23627	PRND
PLEKHG1|ARHGEF41|-|6q25.1|protein-coding	1048.67	4.75009	0.502688	9.44936	3.40895e-21	1.95316e-19	57480	PLEKHG1
CMPK2|NDK|TMPK2|TYKi|UMP-CMPK2|-|2p25.2|protein-coding	46.1139	7.15046	0.757404	9.44075	3.70118e-21	2.11342e-19	129607	CMPK2
FAM167B|C1orf90|-|1p35.2|protein-coding	43.3156	3.75389	0.397746	9.43793	3.80232e-21	2.16386e-19	84734	FAM167B
RNF144A|RNF144|UBCE7IP4|-|2p25.1|protein-coding	940.156	2.86192	0.303271	9.43685	3.84143e-21	2.17879e-19	9781	RNF144A
XIRP2|CMYA3|-|2q24.3|protein-coding	61.6853	5.97673	0.635822	9.40001	5.45568e-21	3.08401e-19	129446	XIRP2
NFATC2|NFAT1|NFATP|-|20q13.2|protein-coding	127.68	4.26208	0.454151	9.38472	6.30838e-21	3.55414e-19	4773	NFATC2
CA2|CA-II|CAC|CAII|Car2|HEL-76|HEL-S-282|-|8q21.2|protein-coding	109.024	5.86049	0.624859	9.3789	6.66626e-21	3.74329e-19	760	CA2
SULF2|HSULF-2|-|20q13.12|protein-coding	2429.56	3.63439	0.388302	9.35972	7.99494e-21	4.47452e-19	55959	SULF2
ABLIM1|ABLIM|LIMAB1|LIMATIN|abLIM-1|-|10q25.3|protein-coding	1485.16	3.55406	0.380316	9.34502	9.18694e-21	5.12468e-19	3983	ABLIM1
PLK2|SNK|hPlk2|hSNK|-|5q11.2|protein-coding	2315.79	2.83975	0.30398	9.3419	9.46227e-21	5.26089e-19	10769	PLK2
CORO7-PAM16|-|-|16p13.3|protein-coding	586.924	1.27558	0.136573	9.33995	9.63805e-21	5.34106e-19	100529144	CORO7-PAM16
NLRC5|CLR16.1|NOD27|NOD4|-|16q13|protein-coding	798.284	1.91061	0.204691	9.3341	1.01856e-20	5.62604e-19	84166	NLRC5
TP53I11|PIG11|-|11p11.2|protein-coding	3265.2	3.57302	0.383627	9.31378	1.23357e-20	6.79145e-19	9537	TP53I11
LY6H|NMLY6|-|8q24.3|protein-coding	277.102	8.27823	0.889275	9.30897	1.29079e-20	7.08344e-19	4062	LY6H
UCP2|BMIQ4|SLC25A8|UCPH|-|11q13.4|protein-coding	145.09	4.67611	0.504421	9.27025	1.85716e-20	1.01585e-18	7351	UCP2
SLC45A3|IPCA-2|IPCA-6|IPCA-8|IPCA6|PCANAP2|PCANAP6|PCANAP8|PRST|-|1q32.1|protein-coding	122.158	3.27113	0.353198	9.26147	2.01646e-20	1.09943e-18	85414	SLC45A3
MAP4K2|BL44|GCK|RAB8IP|-|11q13.1|protein-coding	430.426	2.34493	0.253705	9.24273	2.4029e-20	1.30591e-18	5871	MAP4K2
MMRN1|ECM|EMILIN4|GPIa*|MMRN|-|4q22.1|protein-coding	3652.84	6.6913	0.724674	9.23352	2.61872e-20	1.41864e-18	22915	MMRN1
KIT|C-Kit|CD117|PBT|SCFR|-|4q12|protein-coding	1458.5	3.29428	0.356892	9.23048	2.69415e-20	1.45484e-18	3815	KIT
RPH3AL|NOC2|-|17p13.3|protein-coding	120.94	3.80323	0.412227	9.22608	2.80722e-20	1.51107e-18	9501	RPH3AL
AFDN|AF6|MLL-AF6|MLLT4|-|6q27|protein-coding	1405.89	2.5295	0.274339	9.22035	2.96141e-20	1.58901e-18	4301	AFDN
ADAMTS7|ADAM-TS 7|ADAM-TS7|ADAMTS-7|-|15q25.1|protein-coding	1274.53	3.11221	0.337589	9.21893	3.00088e-20	1.60509e-18	11173	ADAMTS7
RELN|ETL7|LIS2|PRO1598|RL|-|7q22.1|protein-coding	70.3219	4.54071	0.492814	9.21384	3.14656e-20	1.6777e-18	5649	RELN
TFF3|ITF|P1B|TFI|-|21q22.3|protein-coding	159.122	7.35672	0.79901	9.20729	3.34461e-20	1.77769e-18	7033	TFF3
PREX1|P-REX1|-|20q13.13|protein-coding	1141.88	3.4723	0.379363	9.15298	5.53864e-20	2.92544e-18	57580	PREX1
ANKS1A|ANKS1|-|6p21.31|protein-coding	1298.52	2.63556	0.287941	9.15313	5.53081e-20	2.92544e-18	23294	ANKS1A
RAPGEF3|CAMP-GEFI|EPAC|EPAC1|HSU79275|bcm910|-|12q13.11|protein-coding	201.326	3.14905	0.344075	9.15224	5.5766e-20	2.93632e-18	10411	RAPGEF3
ARHGEF28|RGNEF|RIP2|p190RHOGEF|-|5q13.2|protein-coding	1337.61	2.77611	0.303537	9.14589	5.91431e-20	3.10446e-18	64283	ARHGEF28
TMCC3|-|-|12q22|protein-coding	235.978	3.92625	0.431041	9.10876	8.33309e-20	4.36055e-18	57458	TMCC3
GATA2|DCML|IMD21|MONOMAC|NFE1B|-|3q21.3|protein-coding	672.038	3.09922	0.340907	9.09111	9.80347e-20	5.11414e-18	2624	GATA2
FAM219A|C9orf25|-|9p13.3|protein-coding	942.85	1.56658	0.172608	9.07591	1.12734e-19	5.86284e-18	203259	FAM219A
ANO2|C12orf3|TMEM16B|-|12p13.31|protein-coding	39.49	6.1096	0.673553	9.07071	1.18247e-19	6.13071e-18	57101	ANO2
PRKD2|HSPC187|PKD2|nPKC-D2|-|19q13.32|protein-coding	1046.99	2.27583	0.250947	9.06897	1.2015e-19	6.21034e-18	25865	PRKD2
TM6SF1|-|-|15q25.2|protein-coding	210.859	6.48708	0.715473	9.06683	1.22531e-19	6.31407e-18	53346	TM6SF1
SULT1C4|SULT1C|SULT1C2|-|2q12.3|protein-coding	62.9533	4.76564	0.526056	9.05919	1.31417e-19	6.75141e-18	27233	SULT1C4
MYCN|MODED|N-myc|NMYC|ODED|bHLHe37|-|2p24.3|protein-coding	51.5812	8.21404	0.907681	9.04948	1.43656e-19	7.35781e-18	4613	MYCN
CYTH2|ARNO|CTS18|CTS18.1|PSCD2|PSCD2L|SEC7L|Sec7p-L|Sec7p-like|cytohesin-2|-|19q13.33|protein-coding	1206.83	0.975254	0.10797	9.03262	1.67616e-19	8.55904e-18	9266	CYTH2
STX3|STX3A|-|11q12.1|protein-coding	400.602	1.90695	0.211515	9.01567	1.95675e-19	9.96173e-18	6809	STX3
CETP|BPIFF|HDLCQ10|-|16q13|protein-coding	52.2825	6.32119	0.702854	8.9936	2.39271e-19	1.21446e-17	1071	CETP
PPP1R16B|ANKRD4|TIMAP|-|20q11.23|protein-coding	787.048	6.65004	0.739695	8.99025	2.46674e-19	1.24829e-17	26051	PPP1R16B
PKN3|UTDP4-1|-|9q34.11|protein-coding	304.746	3.20048	0.356304	8.98244	2.64832e-19	1.33618e-17	29941	PKN3
COL4A6|CXDELq22.3|DELXq22.3|DFNX6|-|Xq22.3|protein-coding	487.258	4.83618	0.539114	8.9706	2.94891e-19	1.48341e-17	1288	COL4A6
TDRD10|-|-|1q21.3|protein-coding	38.4366	6.56024	0.733016	8.94967	3.56561e-19	1.78831e-17	126668	TDRD10
MID1|BBBG1|FXY|GBBB1|MIDIN|OGS1|OS|OSX|RNF59|TRIM18|XPRF|ZNFXY|-|Xp22.2|protein-coding	348.566	2.59864	0.29109	8.92725	4.3672e-19	2.18386e-17	4281	MID1
PITPNM2|NIR-3|NIR3|RDGB2|RDGBA2|-|12q24.31|protein-coding	467.971	1.74539	0.195591	8.92368	4.51064e-19	2.24893e-17	57605	PITPNM2
ST6GAL1|SIAT1|ST6GalI|ST6N|-|3q27.3|protein-coding	523.76	6.14229	0.689262	8.9114	5.03942e-19	2.50518e-17	6480	ST6GAL1
RCSD1|CAPZIP|MK2S4|-|1q24.2|protein-coding	242.542	3.58302	0.40239	8.90434	5.37038e-19	2.66188e-17	92241	RCSD1
GPRIN3|GRIN3|-|4q22.1|protein-coding	174.616	6.20234	0.697272	8.89514	5.83448e-19	2.88346e-17	285513	GPRIN3
LYL1|bHLHa18|-|19p13.13|protein-coding	130.721	3.20433	0.361914	8.85385	8.45488e-19	4.16631e-17	4066	LYL1
FLI1|EWSR2|SIC-1|-|11q24.3|protein-coding	1067.39	2.78682	0.315492	8.83325	1.01676e-18	4.99573e-17	2313	FLI1
HYAL2|LUCA2|-|3p21.31|protein-coding	2579.35	2.94643	0.333867	8.82516	1.09302e-18	5.35485e-17	8692	HYAL2
PLLP|PMLP|TM4SF11|-|16q13|protein-coding	32.7748	6.65865	0.754689	8.82304	1.11397e-18	5.44171e-17	51090	PLLP
ETS2|ETS2IT1|-|21q22.2|protein-coding	1851.15	2.46185	0.279313	8.81396	1.20799e-18	5.88398e-17	2114	ETS2
TAOK2|MAP3K17|PSK|PSK1|PSK1-BETA|TAO1|TAO2|-|16p11.2|protein-coding	1649.78	1.21328	0.137672	8.81285	1.22007e-18	5.92577e-17	9344	TAOK2
IRAK2|IRAK-2|-|3p25.3|protein-coding	217.419	2.01071	0.228908	8.78393	1.57861e-18	7.64518e-17	3656	IRAK2
ESM1|endocan|-|5q11.2|protein-coding	691.283	5.92803	0.675106	8.78089	1.6219e-18	7.83238e-17	11082	ESM1
SH3TC2|CMT4C|MNMN|-|5q32|protein-coding	121.12	3.11385	0.354671	8.77952	1.64169e-18	7.90537e-17	79628	SH3TC2
GPR37|EDNRBL|PAELR|hET(B)R-LP|-|7q31.33|protein-coding	66.3233	7.07979	0.809418	8.74677	2.19546e-18	1.0542e-16	2861	GPR37
BEND7|C10orf30|-|10p13|protein-coding	75.6445	2.38935	0.273483	8.73676	2.39901e-18	1.14867e-16	222389	BEND7
USP31|-|-|16p12.2|protein-coding	1033.47	2.63463	0.301642	8.73432	2.45132e-18	1.1704e-16	57478	USP31
CCRL2|ACKR5|CKRX|CRAM|CRAM-A|CRAM-B|HCR|-|3p21.31|protein-coding	29.4604	4.65503	0.534203	8.71398	2.93389e-18	1.39686e-16	9034	CCRL2
MAST4|-|-|5q12.3|protein-coding	1178.03	2.09055	0.24038	8.69686	3.41198e-18	1.61992e-16	375449	MAST4
PLA2G16|AdPLA|H-REV107-1|HRASLS3|HREV107|HREV107-1|HREV107-3|HRSL3|-|11q12.3-q13.1|protein-coding	173.929	2.67775	0.308269	8.68643	3.7401e-18	1.77073e-16	11145	PLA2G16
FNBP1L|C1orf39|TOCA1|-|1p22.1|protein-coding	1350.11	1.59834	0.184938	8.64253	5.49834e-18	2.59589e-16	54874	FNBP1L
DGKE|AHUS7|DAGK5|DAGK6|DGK|NPHS7|-|17q22|protein-coding	191.248	2.08218	0.24108	8.63691	5.77554e-18	2.71162e-16	8526	DGKE
HSPG2|HSPG|PLC|PRCAN|SJA|SJS|SJS1|-|1p36.12|protein-coding	40344.4	2.06304	0.238859	8.63707	5.76747e-18	2.71162e-16	3339	HSPG2
GBA2|AD035|NLGase|SPG46|-|9p13.3|protein-coding	1003.7	1.66421	0.19296	8.62463	6.43025e-18	3.01064e-16	57704	GBA2
PKP1|B6P|-|1q32.1|protein-coding	233.71	4.99143	0.579487	8.61353	7.08477e-18	3.30792e-16	5317	PKP1
C22orf34|-|-|22q13.33|protein-coding	31.043	7.47851	0.868289	8.61292	7.12199e-18	3.31614e-16	348645	C22orf34
CARD10|BIMP1|CARMA3|-|22q13.1|protein-coding	457.081	3.50424	0.407228	8.6051	7.62479e-18	3.5405e-16	29775	CARD10
FAM89A|C1orf153|-|1q42.2|protein-coding	377.394	4.64265	0.541185	8.57868	9.59651e-18	4.44384e-16	375061	FAM89A
LIMK2|-|-|22q12.2|protein-coding	717.74	2.21974	0.258913	8.5733	1.00558e-17	4.64378e-16	3985	LIMK2
LDB2|CLIM1|LDB-2|LDB1|-|4p15.32|protein-coding	866.181	2.55618	0.298652	8.55906	1.13789e-17	5.24049e-16	9079	LDB2
EFNA5|AF1|EFL5|EPLG7|GLC1M|LERK7|RAGS|-|5q21.3|protein-coding	74.7688	3.05109	0.357555	8.53321	1.42347e-17	6.53791e-16	1946	EFNA5
MAPK11|P38B|P38BETA2|PRKM11|SAPK2|SAPK2B|p38-2|p38Beta|-|22q13.33|protein-coding	431.326	1.40453	0.164795	8.5229	1.55612e-17	7.12777e-16	5600	MAPK11
HTR1D|5-HT1D|HT1DA|HTR1DA|HTRL|RDC4|-|1p36.12|protein-coding	49.5085	7.25957	0.852505	8.51557	1.65773e-17	7.5727e-16	3352	HTR1D
CADPS2|CAPS2|-|7q31.32|protein-coding	26.8452	3.13122	0.36806	8.50735	1.77957e-17	8.10736e-16	93664	CADPS2
LUZP1|LUZP|-|1p36.12|protein-coding	1737.29	0.898519	0.105706	8.50018	1.89297e-17	8.60082e-16	7798	LUZP1
LOC101929726|-|-|6p21.1|protein-coding	32.5055	6.32372	0.744159	8.49781	1.932e-17	8.75459e-16	101929726	LOC101929726
TRIML2|SPRYD6|-|4q35.2|protein-coding	359.31	6.42923	0.757272	8.48999	2.0665e-17	9.33904e-16	205860	TRIML2
CD9|BTCC-1|DRAP-27|MIC3|MRP-1|TSPAN-29|TSPAN29|-|12p13.31|protein-coding	2611.61	2.5135	0.296342	8.48176	2.21817e-17	9.99773e-16	928	CD9
ITM2A|BRICD2A|E25A|-|Xq21.1|protein-coding	42.6987	8.42461	0.994743	8.46913	2.4724e-17	1.10845e-15	9452	ITM2A
NFE2L3|NRF3|-|7p15.2|protein-coding	262.863	4.40584	0.520219	8.4692	2.47083e-17	1.10845e-15	9603	NFE2L3
SEMA4D|C9orf164|CD100|M-sema-G|SEMAJ|coll-4|-|9q22.2|protein-coding	30.0644	5.04683	0.596282	8.46383	2.58728e-17	1.15688e-15	10507	SEMA4D
PLEKHA1|TAPP1|-|10q26.13|protein-coding	721.907	1.1136	0.131613	8.46113	2.64804e-17	1.18093e-15	59338	PLEKHA1
GALNT18|GALNACT18|GALNT15|GALNTL4|GalNAc-T15|GalNAc-T18|-|11p15.4|protein-coding	300.076	5.05889	0.598415	8.45382	2.81912e-17	1.25392e-15	374378	GALNT18
CRIP2|CRIP|CRP2|ESP1|-|14q32.33|protein-coding	2743.23	2.25463	0.266768	8.45165	2.87215e-17	1.27081e-15	1397	CRIP2
MAGI1|AIP-3|AIP3|BAIAP1|BAP-1|BAP1|MAGI-1|Magi1d|TNRC19|WWP3|-|3p14.1|protein-coding	612.707	2.09542	0.247928	8.45171	2.87067e-17	1.27081e-15	9223	MAGI1
ARHGEF37|-|-|5q32|protein-coding	151.31	3.46475	0.410132	8.44789	2.96625e-17	1.30902e-15	389337	ARHGEF37
PRDM1|BLIMP1|PRDI-BF1|-|6q21|protein-coding	570.289	1.80648	0.214042	8.43985	3.17755e-17	1.39862e-15	639	PRDM1
TMEM189|KUA|-|20q13.13|protein-coding	932.629	1.17652	0.139412	8.43918	3.19582e-17	1.40301e-15	387521	TMEM189
SH3BP5|SAB|SH3BP-5|-|3p25.1|protein-coding	2815.43	2.35218	0.278797	8.43688	3.25916e-17	1.42711e-15	9467	SH3BP5
C6orf141|-|-|6p12.3|protein-coding	56.4003	6.86315	0.814965	8.42141	3.71975e-17	1.62458e-15	135398	C6orf141
SLC27A3|ACSVL3|FATP3|VLCS-3|-|1q21.3|protein-coding	492.066	1.74742	0.207677	8.41412	3.95844e-17	1.72437e-15	11000	SLC27A3
RNFT2|TMEM118|-|12q24.22|protein-coding	23.2269	4.53519	0.5405	8.39073	4.83127e-17	2.09918e-15	84900	RNFT2
BCL2L11|BAM|BIM|BOD|-|2q13|protein-coding	593.561	3.97429	0.473921	8.38597	5.031e-17	2.18036e-15	10018	BCL2L11
USP6NL|RNTRE|TRE2NL|USP6NL-IT1|-|10p14|protein-coding	311.051	1.41789	0.169196	8.38018	5.28455e-17	2.28438e-15	9712	USP6NL
IPO11-LRRC70|-|-|5q12.1|ncRNA	342.643	1.61082	0.192227	8.37978	5.30269e-17	2.28638e-15	101180901	IPO11-LRRC70
GAB1|-|-|4q31.21|protein-coding	307.334	1.7797	0.212453	8.37688	5.43486e-17	2.33741e-15	2549	GAB1
ADAM19|FKSG34|MADDAM|MLTNB|-|5q33.3|protein-coding	2018.13	3.53084	0.42183	8.3703	5.74739e-17	2.46554e-15	8728	ADAM19
FES|FPS|-|15q26.1|protein-coding	347.923	1.95146	0.233162	8.36955	5.78397e-17	2.47495e-15	2242	FES
LOC101926964|-|-|1p32.1-p31.3|ncRNA	44.2328	7.5064	0.898223	8.35695	6.43597e-17	2.74699e-15	101926964	LOC101926964
ATF7IP2|MCAF2|-|16p13.2-p13.13|protein-coding	34.7565	3.14319	0.376163	8.35593	6.49202e-17	2.76393e-15	80063	ATF7IP2
EFCC1|C3orf73|CCDC48|-|3q21.3|protein-coding	42.7811	4.91993	0.590164	8.33656	7.64822e-17	3.24799e-15	79825	EFCC1
PCDH1|PC42|PCDH42|-|5q31.3|protein-coding	1156.16	4.294	0.515246	8.33388	7.8235e-17	3.31411e-15	5097	PCDH1
PPDPF|C20orf149|dJ697K14.9|exdpf|-|20q13.33|protein-coding	2267.98	-1.05295	0.126642	-8.3144	9.2221e-17	3.8968e-15	79144	PPDPF
SCN5A|CDCD2|CMD1E|CMPD2|HB1|HB2|HBBD|HH1|ICCD|IVF|LQT3|Nav1.5|PFHB1|SSS1|VF1|-|3p22.2|protein-coding	35.2868	8.14838	0.983621	8.28406	1.19041e-16	5.01752e-15	6331	SCN5A
CAPN11|calpain11|-|6p21.1|protein-coding	23.4674	5.35019	0.646138	8.28026	1.22903e-16	5.16741e-15	11131	CAPN11
TSNAX-DISC1|-|-|1q42.2|ncRNA	407.403	1.71089	0.206696	8.27732	1.25978e-16	5.28357e-15	100303453	TSNAX-DISC1
RAPGEF1|C3G|GRF2|-|9q34.13|protein-coding	1906.97	1.34252	0.162407	8.26643	1.38028e-16	5.77462e-15	2889	RAPGEF1
APLN|APEL|XNPEP2|-|Xq26.1|protein-coding	7745.22	5.70171	0.689918	8.26432	1.40492e-16	5.86318e-15	8862	APLN
TMC8|EV2|EVER2|EVIN2|-|17q25.3|protein-coding	26.4268	5.74481	0.695608	8.2587	1.4727e-16	6.13092e-15	147138	TMC8
DISC1|C1orf136|SCZD9|-|1q42.2|protein-coding	273.313	2.69558	0.326968	8.24419	1.66284e-16	6.9055e-15	27185	DISC1
TSPAN18|TSPAN|-|11p11.2|protein-coding	1428.77	3.78994	0.459727	8.24388	1.66709e-16	6.90615e-15	90139	TSPAN18
HOXD9|HOX4|HOX4C|Hox-4.3|Hox-5.2|-|2q31.1|protein-coding	329.208	1.76415	0.214186	8.23653	1.77279e-16	7.32607e-15	3235	HOXD9
GFOD2|-|-|16q22.1|protein-coding	278.526	1.42903	0.173782	8.22313	1.98255e-16	8.17293e-15	81577	GFOD2
STX11|FHL4|HLH4|HPLH4|-|6q24.2|protein-coding	118.407	3.81861	0.464485	8.22117	2.01529e-16	8.28769e-15	8676	STX11
FAM43A|-|-|3q29|protein-coding	3477.58	3.29489	0.401094	8.21476	2.12592e-16	8.72143e-15	131583	FAM43A
TSPAN14|DC-TM4F2|TM4SF14|-|10q23.1|protein-coding	1670.05	2.19051	0.266988	8.20451	2.31541e-16	9.47579e-15	81619	TSPAN14
TMEM233|DSPB2|IFITMD2|-|12q24.23|protein-coding	19.8992	7.31829	0.892335	8.20128	2.37844e-16	9.71025e-15	387890	TMEM233
RAPGEF2|CNrasGEF|NRAPGEP|PDZ-GEF1|PDZGEF1|RA-GEF|RA-GEF-1|Rap-GEP|nRap GEP|-|4q32.1|protein-coding	1351.16	1.5501	0.189019	8.20077	2.38846e-16	9.72764e-15	9693	RAPGEF2
PPM1H|ARHCL1|NERPP-2C|URCC2|-|12q14.1-q14.2|protein-coding	159.304	5.17742	0.631394	8.19998	2.40427e-16	9.76852e-15	57460	PPM1H
C1orf115|-|-|1q41|protein-coding	413.527	4.61884	0.563439	8.1976	2.45239e-16	9.94013e-15	79762	C1orf115
IFNAR2|IFN-R|IFN-alpha-REC|IFNABR|IFNARB|IMD45|-|21q22.11|protein-coding	369.405	0.911706	0.111296	8.19169	2.57594e-16	1.04159e-14	3455	IFNAR2
FAM84B|BCMP101|NSE2|-|8q24.21|protein-coding	60.2842	4.12871	0.504082	8.19054	2.60048e-16	1.049e-14	157638	FAM84B
KRT18|CK-18|CYK18|K18|-|12q13.13|protein-coding	114.182	3.705	0.455599	8.13214	4.21781e-16	1.69737e-14	3875	KRT18
HTRA3|Prsp|Tasp|-|4p16.1|protein-coding	838.762	2.59091	0.319003	8.12189	4.58978e-16	1.84267e-14	94031	HTRA3
SP6|EPFN|EPIPROFIN|KLF14|-|17q21.32|protein-coding	94.5692	3.72445	0.458694	8.11968	4.67403e-16	1.86762e-14	80320	SP6
C1orf226|-|-|1q23.3|protein-coding	20.7894	4.97207	0.612347	8.1197	4.67328e-16	1.86762e-14	400793	C1orf226
EPHX4|ABHD7|EH4|EPHXRP|-|1p22.1|protein-coding	37.6081	5.38714	0.664079	8.1122	4.971e-16	1.9816e-14	253152	EPHX4
AIF1L|C9orf58|IBA2|-|9q34.12-q34.13|protein-coding	54.9973	5.93059	0.732473	8.09666	5.64879e-16	2.24649e-14	83543	AIF1L
VLDLR|CAMRQ1|CARMQ1|CHRMQ1|VLDL-R|VLDLRCH|-|9p24.2|protein-coding	994.531	2.89532	0.358242	8.08202	6.37012e-16	2.52741e-14	7436	VLDLR
VIP|PHM27|-|6q25.2|protein-coding	27.6594	5.81097	0.72046	8.06564	7.28536e-16	2.88378e-14	7432	VIP
TRIM16|EBBP|-|17p12|protein-coding	346.178	1.32218	0.163944	8.06484	7.33331e-16	2.89597e-14	10626	TRIM16
CASP12|CASP-12|CASP12P1|-|11q22.3|protein-coding	24.4813	5.03827	0.626464	8.04239	8.81015e-16	3.47107e-14	100506742	CASP12
NUAK1|ARK5|-|12q23.3|protein-coding	1946.02	2.94391	0.36652	8.03206	9.585e-16	3.76757e-14	9891	NUAK1
TCF4|E2-2|FECD3|ITF-2|ITF2|PTHS|SEF-2|SEF2|SEF2-1|SEF2-1A|SEF2-1B|SEF2-1D|TCF-4|bHLHb19|-|18q21.2|protein-coding	3661.37	1.58943	0.198073	8.02447	1.01964e-15	3.99861e-14	6925	TCF4
LRCH1|CHDC1|NP81|-|13q14.13-q14.2|protein-coding	679.393	1.25547	0.156581	8.01806	1.07425e-15	4.20302e-14	23143	LRCH1
TNRC6C-AS1|-|-|17q25.3|ncRNA	29.2366	6.48862	0.811126	7.99952	1.24904e-15	4.87558e-14	100131096	TNRC6C-AS1
FMNL3|FHOD3|FRL2|WBP-3|WBP3|-|12q13.12|protein-coding	2903.55	1.99998	0.250056	7.99814	1.26317e-15	4.91936e-14	91010	FMNL3
RGS12|-|-|4p16.3|protein-coding	515.678	1.57271	0.196708	7.99514	1.29431e-15	5.02906e-14	6002	RGS12
SLC4A11|BTR1|CDPD1|CHED|CHED2|NABC1|dJ794I6.2|-|20p13|protein-coding	80.3259	2.08961	0.261458	7.99214	1.32614e-15	5.14094e-14	83959	SLC4A11
HHIP-AS1|-|-|4q31.21|ncRNA	96.2458	4.66912	0.585199	7.9787	1.47886e-15	5.71983e-14	646576	HHIP-AS1
TSHZ1|CAA|NY-CO-33|SDCCAG33|TSH1|-|18q22.3|protein-coding	506.536	1.30893	0.164268	7.96825	1.60938e-15	6.21042e-14	10194	TSHZ1
LYN|JTK8|p53Lyn|p56Lyn|-|8q12.1|protein-coding	673.442	3.73558	0.4691	7.96328	1.67535e-15	6.4503e-14	4067	LYN
COL18A1|KNO|KNO1|KS|-|21q22.3|protein-coding	18967.6	1.40241	0.176119	7.96286	1.68111e-15	6.45775e-14	80781	COL18A1
SPTA1|EL2|HPP|HS3|SPH3|SPTA|-|1q23.1|protein-coding	37.4482	6.8549	0.861836	7.95383	1.80826e-15	6.93043e-14	6708	SPTA1
LINC00961|SPAR|-|9p13.3|ncRNA	36.0326	3.75359	0.472484	7.94438	1.95162e-15	7.46294e-14	158376	LINC00961
PON2|-|-|7q21.3|protein-coding	1537.03	1.44267	0.182421	7.90845	2.60618e-15	9.9435e-14	5445	PON2
ACE|ACE1|CD143|DCP|DCP1|-|17q23.3|protein-coding	3248.87	3.81565	0.483783	7.88711	3.09275e-15	1.17733e-13	1636	ACE
BCR|ALL|BCR1|CML|D22S11|D22S662|PHL|-|22q11.23|protein-coding	1085.14	1.93272	0.245745	7.86473	3.69886e-15	1.4049e-13	613	BCR
HBEGF|DTR|DTS|DTSF|HEGFL|-|5q31.3|protein-coding	491.7	3.3752	0.430273	7.84432	4.35292e-15	1.64962e-13	1839	HBEGF
MDFI|I-MF|I-mfa|-|6p21.1|protein-coding	79.0162	4.6566	0.595971	7.81347	5.56333e-15	2.10361e-13	4188	MDFI
CHRNA1|ACHRA|ACHRD|CHRNA|CMS1A|CMS1B|CMS2A|FCCMS|SCCMS|-|2q31.1|protein-coding	39.1985	7.8159	1.00037	7.81304	5.58267e-15	2.10621e-13	1134	CHRNA1
SSH2|SSH-2|SSH-2L|-|17q11.2|protein-coding	1017.56	1.58912	0.203773	7.79848	6.26563e-15	2.35861e-13	85464	SSH2
ADAMTS9|-|-|3p14.1|protein-coding	303.368	3.41725	0.438839	7.78702	6.86059e-15	2.57684e-13	56999	ADAMTS9
ATP13A2|CLN12|HSA9947|KRPPD|PARK9|-|1p36.13|protein-coding	675.218	1.41855	0.182195	7.7859	6.92187e-15	2.59409e-13	23400	ATP13A2
SPTBN1|ELF|HEL102|SPTB2|betaSpII|-|2p16.2|protein-coding	12918.6	1.21901	0.156707	7.7789	7.31563e-15	2.73559e-13	6711	SPTBN1
PKD1L1|HTX8|PRO19563|-|7p12.3|protein-coding	27.9792	2.73855	0.352302	7.77329	7.64747e-15	2.85337e-13	168507	PKD1L1
EIF2B2|EIF-2Bbeta|EIF2B|-|14q24.3|protein-coding	963.071	1.78469	0.229771	7.76726	8.02035e-15	2.9859e-13	8892	EIF2B2
ASGR1|ASGPR|ASGPR1|CLEC4H1|HL-1|-|17p13.1|protein-coding	25.8455	2.58355	0.332643	7.76673	8.05406e-15	2.99186e-13	432	ASGR1
ZNF205|RhitH|ZNF210|Zfp13|-|16p13.3|protein-coding	263.177	1.11515	0.143881	7.7505	9.15296e-15	3.39262e-13	7755	ZNF205
DGKH|DGKeta|-|13q14.11|protein-coding	727.962	1.47401	0.1904	7.74161	9.81622e-15	3.6305e-13	160851	DGKH
CEBPZOS|CEBPZ-AS1|-|2p22.2|protein-coding	496.181	-0.80154	0.103617	-7.73563	1.02891e-14	3.7971e-13	100505876	CEBPZOS
CNTNAP3|CASPR3|CNTNAP3A|-|9p12|protein-coding	14.9286	7.39279	0.95633	7.73037	1.07236e-14	3.94881e-13	79937	CNTNAP3
RELT|TNFRSF19L|TRLT|-|11q13.4|protein-coding	227.729	1.99931	0.25995	7.69112	1.45856e-14	5.35927e-13	84957	RELT
LIMCH1|LIMCH1A|LMO7B|-|4p13|protein-coding	259.941	4.54683	0.591479	7.68722	1.50364e-14	5.51292e-13	22998	LIMCH1
ATG4A|APG4A|AUTL2|-|Xq22.3|protein-coding	323.964	1.23321	0.16091	7.664	1.80225e-14	6.59343e-13	115201	ATG4A
ARMC5|AIMAH2|-|16p11.2|protein-coding	439.338	1.32558	0.173717	7.63065	2.33579e-14	8.52689e-13	79798	ARMC5
CNOT6L|CCR4b|-|4q21.1|protein-coding	435.87	1.72549	0.226353	7.623	2.47849e-14	9.02833e-13	246175	CNOT6L
PDLIM3|ALP|-|4q35.1|protein-coding	65.2633	5.03479	0.660969	7.61728	2.59079e-14	9.41712e-13	27295	PDLIM3
CABP4|CRSD|CSNB2B|-|11q13.2|protein-coding	22.432	6.10561	0.801968	7.61328	2.67219e-14	9.69213e-13	57010	CABP4
HHIP|HIP|-|4q31.21|protein-coding	211.3	5.62538	0.739573	7.60626	2.82151e-14	1.02118e-12	64399	HHIP
FLOT2|ECS-1|ECS1|ESA|ESA1|M17S1|-|17q11.2|protein-coding	1342.24	1.36471	0.179812	7.58965	3.20773e-14	1.15848e-12	2319	FLOT2
BMF|-|-|15q15.1|protein-coding	262.213	2.88262	0.380083	7.5842	3.34556e-14	1.20312e-12	90427	BMF
TMEM8A|M83|TMEM6|TMEM8|-|16p13.3|protein-coding	1164.1	0.723835	0.0954367	7.58446	3.33885e-14	1.20312e-12	58986	TMEM8A
GPR162|A-2|GRCA|-|12p13.31|protein-coding	113.323	2.67767	0.35315	7.58224	3.39636e-14	1.2188e-12	27239	GPR162
AGRN|CMS8|CMSPPD|-|1p36.33|protein-coding	3227.04	1.47382	0.195116	7.55357	4.23479e-14	1.51645e-12	375790	AGRN
FXYD6|-|-|11q23.3|protein-coding	29.1757	5.66865	0.750559	7.55257	4.2675e-14	1.52493e-12	53826	FXYD6
HLA-B|AS|B-4901|HLAB|-|6p21.33|protein-coding	8000.78	1.67007	0.221622	7.53569	4.85742e-14	1.73207e-12	3106	HLA-B
UQCRH|QCR6|UQCR8|-|1p33|protein-coding	662.884	-0.559443	0.074301	-7.52941	5.09697e-14	1.81366e-12	7388	UQCRH
DENND3|-|-|8q24.3|protein-coding	590.622	1.92206	0.25529	7.52893	5.11594e-14	1.81659e-12	22898	DENND3
ARHGAP17|MST066|MST110|MSTP038|MSTP066|MSTP110|NADRIN|PP367|PP4534|RICH-1|RICH1|WBP15|-|16p12.1|protein-coding	1147.43	0.834127	0.110989	7.51539	5.67403e-14	2.01053e-12	55114	ARHGAP17
RGL2|HKE1.5|KE1.5|RAB2L|-|6p21.32|protein-coding	1233.78	1.40397	0.186914	7.51128	5.85509e-14	2.07035e-12	5863	RGL2
LINC00920|-|-|16q21|ncRNA	15.2404	4.69964	0.625989	7.50755	6.0246e-14	2.12584e-12	100505865	LINC00920
CARD8-AS1|-|-|19q13.33|ncRNA	99.6564	2.85183	0.380004	7.50472	6.15602e-14	2.16769e-12	100505812	CARD8-AS1
EVA1B|C1orf78|FAM176B|-|1p34.3|protein-coding	1105.3	-0.838393	0.111958	-7.48842	6.9706e-14	2.44942e-12	55194	EVA1B
SLC25A29|C14orf69|CACL|ORNT3|-|14q32.2|protein-coding	466.866	2.00186	0.267667	7.47895	7.49211e-14	2.62721e-12	123096	SLC25A29
CTC1|AAF-132|AAF132|C17orf68|CRMCC|tmp494178|-|17p13.1|protein-coding	325.907	1.58094	0.211808	7.46405	8.39036e-14	2.93611e-12	80169	CTC1
TCN2|D22S676|D22S750|II|TC|TC II|TC-2|TC2|TCII|-|22q12.2|protein-coding	540.132	2.37251	0.318473	7.44963	9.36042e-14	3.2688e-12	6948	TCN2
EPB41|4.1R|EL1|HE|-|1p35.3|protein-coding	82.6295	2.23925	0.301184	7.43481	1.04719e-13	3.64939e-12	2035	EPB41
HSD17B2|EDH17B2|HSD17|SDR9C2|-|16q23.3|protein-coding	54.6252	5.11336	0.688213	7.42992	1.08667e-13	3.7792e-12	3294	HSD17B2
CASKIN2|ANKS5B|-|17q25.1|protein-coding	439.786	1.64819	0.221905	7.42747	1.10695e-13	3.84184e-12	57513	CASKIN2
ITGB4|CD104|GP150|-|17q25.1|protein-coding	371.397	5.63302	0.761745	7.39488	1.41531e-13	4.90195e-12	3691	ITGB4
PTK2|FADK|FAK|FAK1|FRNK|PPP1R71|p125FAK|pp125FAK|-|8q24.3|protein-coding	1837.22	0.980265	0.132605	7.39236	1.44251e-13	4.98594e-12	5747	PTK2
KIAA0355|-|-|19q13.11|protein-coding	815.788	1.65956	0.224576	7.38973	1.47123e-13	5.07484e-12	9710	KIAA0355
PTPRM|PTPRL1|R-PTP-MU|RPTPM|RPTPU|hR-PTPu|-|18p11.23|protein-coding	4139.39	1.35751	0.184133	7.37242	1.67554e-13	5.7678e-12	5797	PTPRM
NID2|NID-2|-|14q22.1|protein-coding	2710.97	1.6064	0.218172	7.36297	1.79859e-13	6.17881e-12	22795	NID2
HERC2|D15F37S1|MRT38|SHEP1|jdf2|p528|-|15q13.1|protein-coding	1461.55	0.74338	0.101055	7.35619	1.8923e-13	6.48756e-12	8924	HERC2
PPT2|C6orf8|G14|PPT-2|-|6p21.32|protein-coding	338.691	1.05054	0.142953	7.34882	1.99968e-13	6.84182e-12	9374	PPT2
HLA-A|HLAA|-|6p22.1|protein-coding	10272.7	1.61629	0.219956	7.34824	2.00834e-13	6.85757e-12	3105	HLA-A
ANXA3|ANX3|-|4q21.21|protein-coding	103.779	2.95069	0.402012	7.3398	2.13919e-13	7.28965e-12	306	ANXA3
JAM3|JAM-2|JAM-3|JAM-C|JAMC|-|11q25|protein-coding	2082.88	0.836595	0.114074	7.3338	2.23709e-13	7.6079e-12	83700	JAM3
CDYL2|PCCP1|-|16q23.2|protein-coding	614.005	1.96814	0.26841	7.33259	2.25752e-13	7.6466e-12	124359	CDYL2
CTSS|-|-|1q21.3|protein-coding	174.674	2.55738	0.348762	7.33276	2.25461e-13	7.6466e-12	1520	CTSS
NFIB|CTF|HMGIC/NFIB|NF-I/B|NF1-B|NFI-B|NFI-RED|NFIB2|NFIB3|-|9p23-p22.3|protein-coding	1016.59	3.82849	0.523312	7.31589	2.55681e-13	8.64306e-12	4781	NFIB
DAAM1|-|-|14q23.1|protein-coding	497.231	2.10256	0.287579	7.31123	2.647e-13	8.93005e-12	23002	DAAM1
LOC441204|-|-|7p15.2|ncRNA	18.0092	5.45023	0.74632	7.30281	2.81819e-13	9.48865e-12	441204	LOC441204
PNP|NP|PRO1837|PUNP|-|14q11.2|protein-coding	1542.53	2.27821	0.312432	7.29186	3.05713e-13	1.02727e-11	4860	PNP
KLHDC8B|CHL|-|3p21.31|protein-coding	615.779	2.34429	0.322119	7.27772	3.39516e-13	1.13859e-11	200942	KLHDC8B
LOC100129434|-|-|2p16.1|ncRNA	29.6703	3.30659	0.454966	7.26779	3.65429e-13	1.22306e-11	100129434	LOC100129434
HLA-H|HLAHP|-|6p22.1|pseudo	781.457	2.09548	0.288431	7.26511	3.72736e-13	1.24506e-11	3136	HLA-H
RPPH1|H1RNA|RPPH1-1|-|14q11.2|ncRNA	54.3512	3.7158	0.512845	7.24546	4.30971e-13	1.43674e-11	85495	RPPH1
MYO5B|-|-|18q21.1|protein-coding	20.5384	5.63895	0.780045	7.22902	4.86503e-13	1.61867e-11	4645	MYO5B
AFF1|AF4|MLLT2|PBM1|-|4q21.3-q22.1|protein-coding	917.901	1.07016	0.148957	7.18434	6.75335e-13	2.24254e-11	4299	AFF1
STAG3L5P-PVRIG2P-PILRB|LOC101735302-LOC101752334-PILRB|-|7q22.1|ncRNA	616.818	1.46181	0.203632	7.17866	7.03955e-13	2.33299e-11	101752399	STAG3L5P-PVRIG2P-PILRB
VSIG2|2210413P10Rik|CTH|CTXL|-|11q24.2|protein-coding	19.6599	4.41321	0.614921	7.17688	7.13191e-13	2.35897e-11	23584	VSIG2
ZCCHC2|C18orf49|-|18q21.33|protein-coding	317.899	1.3063	0.182275	7.16665	7.6853e-13	2.53705e-11	54877	ZCCHC2
ZFYVE26|FYVE-CENT|SPG15|-|14q24.1|protein-coding	584.445	0.682133	0.0952227	7.16356	7.86105e-13	2.59001e-11	23503	ZFYVE26
ADCY4|AC4|-|14q12|protein-coding	760.389	3.46738	0.484442	7.15748	8.21765e-13	2.70223e-11	196883	ADCY4
ISG20|CD25|HEM45|-|15q26.1|protein-coding	162.056	2.26892	0.317263	7.15154	8.58114e-13	2.81628e-11	3669	ISG20
PVRIG2P|-|-|7q22.1|pseudo	139.469	1.39828	0.195642	7.14712	8.86153e-13	2.90266e-11	101752334	PVRIG2P
CDC14A|DFNB105|cdc14|hCDC14|-|1p21.2|protein-coding	140.897	2.46834	0.345598	7.14224	9.18216e-13	3.00187e-11	8556	CDC14A
ADGRL4|ELTD1|ETL|KPG_003|-|1p31.1|protein-coding	1787.37	2.49512	0.349747	7.13409	9.74309e-13	3.17911e-11	64123	ADGRL4
MMP10|SL-2|STMY2|-|11q22.2|protein-coding	18.7778	5.51386	0.772973	7.13331	9.79846e-13	3.19101e-11	4319	MMP10
RASIP1|RAIN|-|19q13.33|protein-coding	934.492	4.31654	0.605466	7.12929	1.00887e-12	3.27922e-11	54922	RASIP1
SLCO2A1|MATR1|OATP2A1|PGT|PHOAR2|SLC21A2|-|3q22.1-q22.2|protein-coding	357.291	5.3071	0.744702	7.12647	1.02978e-12	3.34076e-11	6578	SLCO2A1
LINC01013|-|-|6q23.2|ncRNA	38.4107	4.9554	0.695569	7.12424	1.04659e-12	3.38879e-11	100507254	LINC01013
ABCD4|ABC41|EST352188|MAHCJ|P70R|P79R|PMP69|PXMP1L|-|14q24.3|protein-coding	508.693	1.10243	0.154817	7.12087	1.07248e-12	3.46597e-11	5826	ABCD4
MSMP|PSMP|-|9p13.3|protein-coding	18.742	6.25754	0.878898	7.11975	1.0812e-12	3.48748e-11	692094	MSMP
SVIP|-|-|11p14.3|protein-coding	168.541	2.46716	0.346634	7.11748	1.09918e-12	3.53874e-11	258010	SVIP
CAPN10|CANP10|NIDDM1|-|2q37.3|protein-coding	266.555	0.774066	0.108876	7.10959	1.16392e-12	3.74003e-11	11132	CAPN10
KIF26A|-|-|14q32.33|protein-coding	19.3484	5.06075	0.712587	7.10194	1.23021e-12	3.94554e-11	26153	KIF26A
MAP3K3|MAPKKK3|MEKK3|-|17q23.3|protein-coding	1311.13	1.18259	0.166555	7.10026	1.24518e-12	3.98601e-11	4215	MAP3K3
FAM107B|C10orf45|HITS|-|10p13|protein-coding	522.796	2.42859	0.342318	7.09455	1.29773e-12	4.14637e-11	83641	FAM107B
PILRB|FDFACT1|FDFACT2|-|7q22.1|protein-coding	314.14	1.55511	0.219523	7.08403	1.4002e-12	4.46531e-11	29990	PILRB
GIT1|-|-|17q11.2|protein-coding	1165.03	1.30697	0.184716	7.07558	1.48822e-12	4.73709e-11	28964	GIT1
LOC100506603|-|-|14q24.3|ncRNA	76.3302	1.90073	0.268961	7.06694	1.58386e-12	5.03203e-11	100506603	LOC100506603
GNG11|GNGT11|-|7q21.3|protein-coding	4236.71	2.06595	0.292375	7.06609	1.5936e-12	5.05346e-11	2791	GNG11
KHK|-|-|2p23.3|protein-coding	34.7829	2.43406	0.344598	7.06348	1.62381e-12	5.13963e-11	3795	KHK
TMEM235|ARGM1|-|17q25.3|protein-coding	16.9095	6.59783	0.934413	7.06094	1.65381e-12	5.22481e-11	283999	TMEM235
STK32B|HSA250839|STK32|STKG6|YANK2|-|4p16.2|protein-coding	676.705	3.09195	0.440546	7.01844	2.24363e-12	7.07498e-11	55351	STK32B
ADAM15|MDC15|-|1q21.3|protein-coding	2938.46	1.60132	0.228167	7.01817	2.24798e-12	7.0755e-11	8751	ADAM15
THSD1|TMTSP|UNQ3010|-|13q14.3|protein-coding	727.07	2.08898	0.297757	7.01571	2.28784e-12	7.18757e-11	55901	THSD1
LOC101928370|-|-|1p21.2|ncRNA	28.9967	3.37159	0.481425	7.00336	2.49898e-12	7.83632e-11	101928370	LOC101928370
HES2|bHLHb40|-|1p36.31|protein-coding	50.719	4.53328	0.647353	7.00279	2.5091e-12	7.85236e-11	54626	HES2
ITSN2|PRO2015|SH3D1B|SH3P18|SWA|SWAP|-|2p23.3|protein-coding	541.762	1.15505	0.164947	7.00255	2.51339e-12	7.85236e-11	50618	ITSN2
TBCD|PEBAT|SSD-1|tfcD|-|17q25.3|protein-coding	1676.17	0.863121	0.123375	6.9959	2.63554e-12	8.2188e-11	6904	TBCD
GIMAP2|HIMAP2|IAN12|IMAP2|-|7q36.1|protein-coding	110.423	3.25001	0.465317	6.98451	2.8586e-12	8.898e-11	26157	GIMAP2
ACSS1|ACAS2L|ACECS1|AceCS2L|-|20p11.21|protein-coding	209.63	1.73556	0.248533	6.9832	2.8853e-12	8.9646e-11	84532	ACSS1
IL27RA|CRL1|IL-27RA|IL27R|TCCR|WSX1|zcytor1|-|19p13.12|protein-coding	192.765	1.77099	0.253685	6.98107	2.92946e-12	9.0851e-11	9466	IL27RA
RNF180|RINES|-|5q12.3|protein-coding	22.5102	2.66495	0.382168	6.97324	3.09724e-12	9.58783e-11	285671	RNF180
FGD6|ZFYVE24|-|12q22|protein-coding	489.292	1.13988	0.163479	6.97265	3.11024e-12	9.61048e-11	55785	FGD6
SCNN1G|BESC3|ENaCg|ENaCgamma|PHA1|SCNEG|-|16p12.2|protein-coding	21.9356	6.97572	1.00256	6.95793	3.45316e-12	1.06506e-10	6340	SCNN1G
MYO6|DFNA22|DFNB37|-|6q14.1|protein-coding	1316.58	0.807055	0.116002	6.95722	3.47043e-12	1.06844e-10	4646	MYO6
TMCC1|-|-|3q22.1|protein-coding	487.56	1.12415	0.161701	6.95205	3.6002e-12	1.10637e-10	23023	TMCC1
PTPRK|R-PTP-kappa|-|6q22.33|protein-coding	1425.24	1.30512	0.188056	6.94006	3.9192e-12	1.20222e-10	5796	PTPRK
FAM78A|C9orf59|-|9q34.13|protein-coding	248.777	3.14066	0.452661	6.93822	3.97084e-12	1.21585e-10	286336	FAM78A
UVRAG|DHTX|VPS38|p63|-|11q13.5|protein-coding	629.969	1.21801	0.175622	6.93543	4.04996e-12	1.23784e-10	7405	UVRAG
PDZD2|AIPC|PAPIN|PDZK3|PIN1|-|5p13.3|protein-coding	195.555	4.18523	0.604643	6.92182	4.45881e-12	1.36034e-10	23037	PDZD2
PAWR|PAR4|Par-4|-|12q21.2|protein-coding	244.847	1.01895	0.147359	6.91477	4.68632e-12	1.42717e-10	5074	PAWR
CLDN14|DFNB29|-|21q22.13|protein-coding	21.7206	5.72668	0.828442	6.91259	4.75899e-12	1.4467e-10	23562	CLDN14
APP|AAA|ABETA|ABPP|AD1|APPI|CTFgamma|CVAP|PN-II|PN2|-|21q21.3|protein-coding	20237.4	0.991547	0.143448	6.91222	4.77131e-12	1.44784e-10	351	APP
MYRIP|SLAC2-C|SLAC2C|-|3p22.1|protein-coding	268.751	4.20547	0.608923	6.90642	4.97053e-12	1.50559e-10	25924	MYRIP
TRG-AS1|TCRGV|-|7p14.1|ncRNA	15.8439	5.58915	0.810661	6.89455	5.4034e-12	1.63378e-10	100506776	TRG-AS1
NECTIN2|CD112|HVEB|PRR2|PVRL2|PVRR2|-|19q13.32|protein-coding	1024.23	1.07764	0.156399	6.89035	5.56567e-12	1.67984e-10	5819	NECTIN2
SNN|-|-|16p13.13|protein-coding	404.567	1.54162	0.223862	6.88647	5.71948e-12	1.72283e-10	8303	SNN
ITGA9|ALPHA-RLC|ITGA4L|RLC|-|3p22.2|protein-coding	63.7816	3.40587	0.494591	6.88624	5.72849e-12	1.72283e-10	3680	ITGA9
LMBR1|ACHP|C7orf2|DIF14|LSS|PPD2|THYP|TPT|ZRS|-|7q36.3|protein-coding	905.761	1.90423	0.276729	6.88121	5.93466e-12	1.78166e-10	64327	LMBR1
C15orf39|-|-|15q24.2|protein-coding	576.646	1.01718	0.147828	6.88082	5.95102e-12	1.78341e-10	56905	C15orf39
RIN3|-|-|14q32.12|protein-coding	519.924	1.76563	0.256755	6.87672	6.12475e-12	1.83222e-10	79890	RIN3
LMO2|RBTN2|RBTNL1|RHOM2|TTG2|-|11p13|protein-coding	242.654	3.99309	0.581495	6.86694	6.55919e-12	1.95872e-10	4005	LMO2
KLF2|LKLF|-|19p13.11|protein-coding	667.001	2.56765	0.374186	6.86196	6.79225e-12	2.02474e-10	10365	KLF2
TMEM102|CBAP|-|17p13.1|protein-coding	58.754	1.91084	0.27849	6.86144	6.81708e-12	2.02856e-10	284114	TMEM102
SLC16A13|MCT13|-|17p13.1|protein-coding	33.9986	2.87206	0.418603	6.86106	6.83516e-12	2.03037e-10	201232	SLC16A13
NOD1|CARD4|CLR7.1|NLRC1|-|7p14.3|protein-coding	524.752	1.83402	0.267365	6.8596	6.90516e-12	2.04756e-10	10392	NOD1
DNASE1L3|DHP2|DNAS1L3|LSD|SLEB16|-|3p14.3|protein-coding	19.8556	6.8301	0.995941	6.85793	6.98632e-12	2.068e-10	1776	DNASE1L3
RASSF3|RASSF5|-|12q14.2|protein-coding	605.578	1.36408	0.199054	6.85282	7.24082e-12	2.13959e-10	283349	RASSF3
TOR4A|C9orf167|-|9q34.3|protein-coding	740.677	1.3613	0.198847	6.84596	7.59633e-12	2.24072e-10	54863	TOR4A
RFX3|-|-|9p24.2|protein-coding	130.09	1.31765	0.192529	6.84391	7.70605e-12	2.26912e-10	5991	RFX3
TACC2|AZU-1|ECTACC|-|10q26.13|protein-coding	455.989	1.83065	0.26776	6.83689	8.09328e-12	2.379e-10	10579	TACC2
MAML1|Mam-1|Mam1|-|5q35.3|protein-coding	899.208	0.528734	0.0774097	6.83033	8.47179e-12	2.48313e-10	9794	MAML1
FRAT1|-|-|10q24.1|protein-coding	40.9471	1.85823	0.272059	6.83025	8.47689e-12	2.48313e-10	10023	FRAT1
ITGA6|CD49f|ITGA6B|VLA-6|-|2q31.1|protein-coding	3997.64	3.54813	0.520183	6.82093	9.04544e-12	2.64509e-10	3655	ITGA6
SIRPA|BIT|CD172A|MFR|MYD-1|P84|PTPNS1|SHPS1|SIRP|-|20p13|protein-coding	1580.95	1.18374	0.173601	6.81877	9.18248e-12	2.68052e-10	140885	SIRPA
ARHGDIB|D4|GDIA2|GDID4|LYGDI|Ly-GDI|RAP1GN1|RhoGDI2|-|12p12.3|protein-coding	1206.53	2.71853	0.398853	6.81585	9.3707e-12	2.73075e-10	397	ARHGDIB
ZSCAN16|ZNF392|ZNF435|dJ265C24.3|-|6p22.1|protein-coding	37.1265	2.25016	0.330403	6.81033	9.73719e-12	2.83267e-10	80345	ZSCAN16
SLC7A7|LAT3|LPI|MOP-2|Y+LAT1|y+LAT-1|-|14q11.2|protein-coding	108.691	2.31163	0.339529	6.80834	9.87328e-12	2.86732e-10	9056	SLC7A7
FAM65A|-|-|16q22.1|protein-coding	1947.36	0.782328	0.114929	6.80703	9.96328e-12	2.8885e-10	79567	FAM65A
GCOM1|GRINL1A|Gcom2|MYZAP|MYZAP-POLR2M|gcom|-|15q21.3|protein-coding	919.541	1.87561	0.275552	6.80673	9.98387e-12	2.88951e-10	145781	GCOM1
TGFBRAP1|TRAP-1|TRAP1|VPS3|-|2q12.1-q12.2|protein-coding	990.363	1.52041	0.22349	6.80303	1.0244e-11	2.95972e-10	9392	TGFBRAP1
SFMBT2|-|-|10p14|protein-coding	34.8518	2.95938	0.435827	6.79027	1.11926e-11	3.22279e-10	57713	SFMBT2
RASSF4|AD037|-|10q11.21|protein-coding	486.003	2.32991	0.343123	6.79031	1.11896e-11	3.22279e-10	83937	RASSF4
SAMD10|C20orf136|dJ591C20|dJ591C20.7|-|20q13.33|protein-coding	55.2646	2.26238	0.334048	6.77262	1.26473e-11	3.63546e-10	140700	SAMD10
RGS9|PERRS|RGS9L|-|17q24.1|protein-coding	31.8733	3.96095	0.585024	6.77058	1.28271e-11	3.68089e-10	8787	RGS9
EPB41L4A-AS2|-|-|5q22.2|ncRNA	10.7637	6.92105	1.02233	6.76985	1.28917e-11	3.69315e-10	54508	EPB41L4A-AS2
LILRB1|CD85J|ILT-2|ILT2|LIR-1|LIR1|MIR-7|MIR7|PIR-B|PIRB|-|19q13.42|protein-coding	8.9656	6.16115	0.910365	6.76778	1.30771e-11	3.73992e-10	10859	LILRB1
CD53|MOX44|TSPAN25|-|1p13.3|protein-coding	14.4872	6.86052	1.01416	6.76474	1.33547e-11	3.81285e-10	963	CD53
SMIM15|C5orf43|-|5q12.1|protein-coding	481.665	-0.745622	0.110402	-6.75372	1.44099e-11	4.10718e-10	643155	SMIM15
TMEM51|C1orf72|-|1p36.21|protein-coding	102.46	2.53747	0.376555	6.73865	1.59869e-11	4.549e-10	55092	TMEM51
THEMIS2|C1orf38|ICB-1|-|1p35.3|protein-coding	415.518	1.97998	0.293849	6.73809	1.60486e-11	4.55888e-10	9473	THEMIS2
TDRKH|TDRD2|-|1q21.3|protein-coding	66.4023	1.2083	0.179526	6.73048	1.69102e-11	4.79558e-10	11022	TDRKH
MANBAL|-|-|20q11.23|protein-coding	624.858	-0.679611	0.101068	-6.7243	1.76441e-11	4.98711e-10	63905	MANBAL
CALM1|CALML2|CAMI|CPVT4|DD132|LQT14|PHKD|caM|-|14q32.11|protein-coding	9367.31	1.68242	0.250201	6.72429	1.76446e-11	4.98711e-10	801	CALM1
UBTD1|-|-|10q24.1-q24.2|protein-coding	782.294	1.1755	0.174883	6.72165	1.7968e-11	5.07003e-10	80019	UBTD1
PPP3CB|CALNA2|CALNB|CNA2|PP2Bbeta|-|10q22.2|protein-coding	995.667	-0.635183	0.0947507	-6.70373	2.03165e-11	5.72315e-10	5532	PPP3CB
MTMR9LP|MTMR9L|-|1p35.2|pseudo	413.438	2.87853	0.429724	6.69856	2.10485e-11	5.9195e-10	339483	MTMR9LP
TBC1D4|AS160|NIDDM5|-|13q22.2|protein-coding	1177.66	1.12339	0.167758	6.69647	2.13513e-11	5.99467e-10	9882	TBC1D4
GBX2|-|-|2q37.2|protein-coding	26.2534	6.75077	1.00866	6.6928	2.18946e-11	6.13701e-10	2637	GBX2
ENG|END|HHT1|ORW1|-|9q34.11|protein-coding	3288.59	1.6105	0.24066	6.69199	2.20159e-11	6.16081e-10	2022	ENG
TMEM2|-|-|9q21.13|protein-coding	1759.05	1.27388	0.190376	6.69136	2.21112e-11	6.17724e-10	23670	TMEM2
RASGRP2|CALDAG-GEFI|CDC25L|-|11q13.1|protein-coding	45.735	2.20557	0.329738	6.68886	2.24912e-11	6.27305e-10	10235	RASGRP2
LOC100996351|-|-|19p13.3|ncRNA	12.0821	6.10686	0.913276	6.68677	2.28151e-11	6.3529e-10	100996351	LOC100996351
ARHGAP27P1-BPTFP1-KPNA2P3|-|-|-|pseudo	359.872	1.84736	0.276566	6.67965	2.39514e-11	6.65834e-10	109286553	ARHGAP27P1-BPTFP1-KPNA2P3
MSL3|MSL3L1|-|Xp22.2|protein-coding	503.677	0.786124	0.117857	6.67017	2.55507e-11	7.09126e-10	10943	MSL3
SLC22A18AS|BWR1B|BWSCR1B|ORCTL2S|SLC22A1LS|p27-BWR1B|-|11p15.4|protein-coding	11.5252	6.52589	0.979899	6.65976	2.7428e-11	7.59979e-10	5003	SLC22A18AS
PDE4B|DPDE4|PDEIVB|-|1p31.3|protein-coding	1310.88	2.11211	0.317289	6.65672	2.80001e-11	7.74562e-10	5142	PDE4B
HLA-E|HLA-6.2|QA1|-|6p22.1|protein-coding	10893.2	1.52911	0.229921	6.65058	2.91935e-11	8.06256e-10	3133	HLA-E
MRPS18B|C6orf14|HSPC183|HumanS18a|MRP-S18-2|MRPS18-2|PTD017|S18amt|-|6p21.33|protein-coding	678.988	-0.741342	0.111612	-6.64211	3.09225e-11	8.52614e-10	28973	MRPS18B
PARP15|ARTD7|BAL3|pART7|-|3q21.1|protein-coding	45.7116	3.32556	0.501137	6.63603	3.22234e-11	8.87036e-10	165631	PARP15
KMT2D|AAD10|ALR|CAGL114|KABUK1|KMS|MLL2|MLL4|TNRC21|-|12q13.12|protein-coding	1892.14	0.812714	0.122532	6.63268	3.29646e-11	9.05964e-10	8085	KMT2D
RNASE6|RAD1|RNS6|RNasek6|-|14q11.2|protein-coding	10.4929	6.38917	0.963471	6.63141	3.32496e-11	9.12313e-10	6039	RNASE6
CELSR1|ADGRC1|CDHF9|FMI2|HFMI2|ME2|-|22q13.31|protein-coding	27.3887	2.20248	0.332367	6.62665	3.4339e-11	9.40676e-10	9620	CELSR1
SIRPB2|PTPN1L|PTPNS1L3|dJ776F14.2|-|20p13|protein-coding	23.0074	6.13936	0.926998	6.62285	3.52348e-11	9.63656e-10	284759	SIRPB2
RAB15|-|-|14q23.3|protein-coding	257.719	2.30714	0.348867	6.61325	3.75981e-11	1.02663e-09	376267	RAB15
NEK3|HSPK36|-|13q14.3|protein-coding	356.373	1.23164	0.186298	6.61111	3.81455e-11	1.0399e-09	4752	NEK3
LRRC38|-|-|1p36.21|protein-coding	7.3223	6.3637	0.963794	6.60277	4.03553e-11	1.09836e-09	126755	LRRC38
STMN3|SCLIP|-|20q13.33|protein-coding	428.346	-1.1917	0.180681	-6.59563	4.23449e-11	1.15066e-09	50861	STMN3
NCBP2|CBC2|CBP20|NIP1|PIG55|-|3q29|protein-coding	1425.16	-0.545889	0.0828603	-6.58807	4.45595e-11	1.2089e-09	22916	NCBP2
COL4A5|ASLN|ATS|CA54|-|Xq22.3|protein-coding	1293.75	2.96133	0.44963	6.58614	4.51419e-11	1.22274e-09	1287	COL4A5
B4GALT5|B4Gal-T5|BETA4-GALT-IV|beta4Gal-T5|beta4GalT-V|gt-V|-|20q13.13|protein-coding	1388.8	1.05247	0.15984	6.58451	4.56373e-11	1.23418e-09	9334	B4GALT5
SLC43A3|EEG1|FOAP-13|PRO1659|SEEEG-1|-|11q12.1|protein-coding	1700.36	1.83308	0.278607	6.57945	4.72202e-11	1.27292e-09	29015	SLC43A3
VSIG10|-|-|12q24.23|protein-coding	262.63	1.4922	0.226797	6.57945	4.72203e-11	1.27292e-09	54621	VSIG10
NRP2|NP2|NPN2|PRO2714|VEGF165R2|-|2q33.3|protein-coding	2375.49	2.2326	0.339468	6.57677	4.80785e-11	1.29398e-09	8828	NRP2
GNA14|-|-|9q21.2|protein-coding	13.7869	2.75797	0.420213	6.56327	5.2639e-11	1.41447e-09	9630	GNA14
HSPC324|-|-|9q34.3|ncRNA	18.1546	7.18777	1.09557	6.56075	5.35366e-11	1.43631e-09	101928612	HSPC324
PRR29|C17orf72|-|17q23.3|protein-coding	10.9569	3.81952	0.582373	6.55854	5.43386e-11	1.45552e-09	92340	PRR29
BTNL9|BTN3|BTN8|VDLS1900|-|5q35.3|protein-coding	16.2099	5.2868	0.807049	6.55078	5.72374e-11	1.53074e-09	153579	BTNL9
SIPA1|SPA1|-|11q13.1|protein-coding	986.976	1.54857	0.236835	6.53858	6.21068e-11	1.65834e-09	6494	SIPA1
PRRG2|PRGP2|-|19q13.33|protein-coding	17.0303	3.51353	0.537398	6.53804	6.23316e-11	1.66172e-09	5639	PRRG2
HLA-G|MHC-G|-|6p22.1|protein-coding	78.6197	1.87938	0.287463	6.5378	6.24319e-11	1.66177e-09	3135	HLA-G
PLCG1|NCKAP3|PLC-II|PLC1|PLC148|PLCgamma1|-|20q12|protein-coding	3037.02	1.40924	0.215666	6.53438	6.3875e-11	1.69751e-09	5335	PLCG1
UNC13B|MUNC13|UNC13|Unc13h2|-|9p13.3|protein-coding	1467.55	1.09058	0.167248	6.52075	6.99546e-11	1.85616e-09	10497	UNC13B
APLP2|APLP-2|APPH|APPL2|CDEBP|-|11q24.3|protein-coding	16191.7	0.574984	0.0881879	6.51998	7.03146e-11	1.86279e-09	334	APLP2
SPOCK2|testican-2|-|10q22.1|protein-coding	44.0964	3.50584	0.53782	6.51861	7.09628e-11	1.87702e-09	9806	SPOCK2
HECW2|NEDL2|-|2q32.3|protein-coding	668.382	1.81301	0.278813	6.5026	7.8946e-11	2.08491e-09	57520	HECW2
NEDD9|CAS-L|CAS2|CASL|CASS2|HEF1|-|6p24.2|protein-coding	1534.59	2.63698	0.405769	6.49873	8.09986e-11	2.13578e-09	4739	NEDD9
ANO9|PIG5|TMEM16J|TP53I5|-|11p15.5|protein-coding	12.989	6.69973	1.0323	6.49012	8.57661e-11	2.25797e-09	338440	ANO9
RNF145|-|-|5q33.3|protein-coding	1273.7	0.860725	0.132768	6.48294	8.99543e-11	2.36455e-09	153830	RNF145
FAM118A|C22orf8|-|22q13.31|protein-coding	792.308	1.49967	0.231673	6.47325	9.59199e-11	2.51745e-09	55007	FAM118A
CLN8|C8orf61|EPMR|-|8p23.3|protein-coding	489.036	0.782716	0.120922	6.47292	9.61271e-11	2.51898e-09	2055	CLN8
MEF2C|C5DELq14.3|DEL5q14.3|-|5q14.3|protein-coding	792.311	1.68699	0.260792	6.46872	9.8837e-11	2.58598e-09	4208	MEF2C
SERP1|RAMP4|-|3q25.1|protein-coding	2193.37	-0.495915	0.0767737	-6.45945	1.05087e-10	2.74525e-09	27230	SERP1
BACE2|AEPLC|ALP56|ASP1|ASP21|BAE2|CDA13|CEAP1|DRAP|-|21q22.2-q22.3|protein-coding	1637.1	1.57239	0.243689	6.45247	1.10042e-10	2.87025e-09	25825	BACE2
SYNM|DMN|SYN|-|15q26.3|protein-coding	232.357	1.55787	0.241453	6.45205	1.10347e-10	2.87379e-09	23336	SYNM
SLC18B1|C6orf192|dJ55C23.6|-|6q23.2|protein-coding	140.321	1.61591	0.250467	6.45162	1.10662e-10	2.87756e-09	116843	SLC18B1
HYAL1|HYAL-1|LUCA1|MPS9|NAT6|-|3p21.31|protein-coding	34.3035	3.7732	0.585139	6.44838	1.13053e-10	2.9352e-09	3373	HYAL1
SAMSN1|HACS1|NASH1|SASH2|SH3D6B|SLy2|-|21q11.2|protein-coding	11.8987	4.56449	0.709626	6.43224	1.25737e-10	3.25952e-09	64092	SAMSN1
TOMM20|MAS20|MOM19|TOM20|-|1q42.3|protein-coding	2470.24	-0.5983	0.0930762	-6.42806	1.29243e-10	3.34528e-09	9804	TOMM20
DGKD|DGKdelta|dgkd-2|-|2q37.1|protein-coding	482.543	1.42073	0.221034	6.42766	1.29587e-10	3.34906e-09	8527	DGKD
NLRP2|CLR19.9|NALP2|NBS1|PAN1|PYPAF2|-|19q13.42|protein-coding	8.99121	6.16745	0.959648	6.42678	1.30332e-10	3.36316e-09	55655	NLRP2
SMYD5|NN8-4AG|RAI15|RRG1|ZMYND23|-|2p13.2|protein-coding	394.84	-0.540876	0.0841782	-6.42537	1.31548e-10	3.38938e-09	10322	SMYD5
MESDC1|-|-|15q25.1|protein-coding	590.689	1.13062	0.176196	6.41682	1.39149e-10	3.57975e-09	59274	MESDC1
GRASP|TAMALIN|-|12q13.13|protein-coding	350.565	2.74878	0.428772	6.41082	1.44739e-10	3.71226e-09	160622	GRASP
THEM6|C8orf55|DSCD75|-|8q24.3|protein-coding	142.454	1.28881	0.201032	6.41093	1.44631e-10	3.71226e-09	51337	THEM6
SNHG16|Nbla10727|Nbla12061|ncRAN|-|17q25.1|ncRNA	730.594	-0.603875	0.0942481	-6.40728	1.48134e-10	3.79358e-09	100507246	SNHG16
DUSP22|JKAP|JSP-1|JSP1|LMW-DSP2|LMWDSP2|MKP-x|MKPX|VHX|-|6p25.3|protein-coding	450.615	1.37795	0.215431	6.39624	1.59247e-10	4.072e-09	56940	DUSP22
SYT9|-|-|11p15.4|protein-coding	21.9436	6.97566	1.09106	6.39344	1.62194e-10	4.14109e-09	143425	SYT9
HERC1|MDFPMR|p532|p619|-|15q22.31|protein-coding	1611.15	1.05399	0.165068	6.38522	1.7115e-10	4.36315e-09	8925	HERC1
ADAMTS18|ADAMTS21|KNO2|MMCAT|-|16q23.1|protein-coding	49.3097	6.67388	1.04685	6.37518	1.82752e-10	4.65192e-09	170692	ADAMTS18
PCDHB12|PCDH-BETA12|-|5q31.3|protein-coding	14.9495	2.3177	0.363636	6.37367	1.84554e-10	4.69072e-09	56124	PCDHB12
MTSS1|MIM|MIMA|MIMB|-|8q24.13|protein-coding	570.472	2.65569	0.416756	6.37228	1.86241e-10	4.7265e-09	9788	MTSS1
FAM216A|C12orf24|HSU79274|-|12q24.11|protein-coding	207.084	-1.21902	0.191373	-6.36989	1.89165e-10	4.7935e-09	29902	FAM216A
MSR1|CD204|SCARA1|SR-A|SRA|phSR1|phSR2|-|8p22|protein-coding	33.9007	4.96305	0.780259	6.36077	2.00748e-10	5.0794e-09	4481	MSR1
LRRC4|NAG14|NGL-2|-|7q32.1|protein-coding	49.0152	3.98337	0.627544	6.34755	2.18766e-10	5.52702e-09	64101	LRRC4
CXADR|CAR|CAR4/6|HCAR|-|21q21.1|protein-coding	8.36235	6.05672	0.955345	6.33982	2.3003e-10	5.80292e-09	1525	CXADR
MFSD4A|MFSD4|UNQ3064|-|1q32.1|protein-coding	26.6077	3.41614	0.538944	6.33858	2.31892e-10	5.84119e-09	148808	MFSD4A
AGO4|EIF2C4|-|1p34.3|protein-coding	527.121	0.985962	0.155734	6.33108	2.43455e-10	6.12333e-09	192670	AGO4
FGD4|CMT4H|FRABP|ZFYVE6|-|12p11.21|protein-coding	274.206	1.6557	0.261837	6.3234	2.55866e-10	6.42593e-09	121512	FGD4
LOC100507002|-|-|17q24.1|ncRNA	28.3028	3.65086	0.577493	6.32191	2.58347e-10	6.4786e-09	100507002	LOC100507002
TBC1D9|GRAMD9|MDR1|-|4q31.21|protein-coding	813.53	1.15242	0.182407	6.31783	2.6527e-10	6.64236e-09	23158	TBC1D9
GGA1|-|-|22q13.1|protein-coding	978.953	1.13336	0.179467	6.31513	2.69931e-10	6.74908e-09	26088	GGA1
RNF144A-AS1|-|-|2p25.1|ncRNA	23.3071	3.04451	0.482224	6.31348	2.72829e-10	6.81146e-09	386597	RNF144A-AS1
DTNBP1|BLOC1S8|DBND|HPS7|My031|SDY|-|6p22.3|protein-coding	244.483	1.81232	0.287116	6.31215	2.75181e-10	6.86003e-09	84062	DTNBP1
HPSE|HPA|HPA1|HPR1|HPSE1|HSE1|-|4q21.23|protein-coding	58.9773	4.64805	0.736594	6.31019	2.78697e-10	6.93644e-09	10855	HPSE
ARHGEF12|LARG|PRO2792|-|11q23.3|protein-coding	3773.87	0.778814	0.123426	6.30998	2.79066e-10	6.93644e-09	23365	ARHGEF12
GRPEL2|Mt-GrpE#2|-|5q32|protein-coding	858.214	2.23579	0.354558	6.30585	2.86618e-10	7.11368e-09	134266	GRPEL2
TNIP2|ABIN2|FLIP1|KLIP|-|4p16.3|protein-coding	602.412	0.704243	0.11181	6.29857	3.00407e-10	7.44499e-09	79155	TNIP2
RPS16|S16|-|19q13.2|protein-coding	4991.74	-0.645441	0.102588	-6.29158	3.14261e-10	7.77692e-09	6217	RPS16
MTMR12|3-PAP|PIP3AP|-|5p13.3|protein-coding	679.367	1.4601	0.232229	6.28734	3.22954e-10	7.98037e-09	54545	MTMR12
JAK1|JAK1A|JAK1B|JTK3|-|1p31.3|protein-coding	4560.4	1.0654	0.169612	6.28142	3.35485e-10	8.2779e-09	3716	JAK1
RPS2|LLREP3|S2|-|16p13.3|protein-coding	5092.07	-0.709687	0.113027	-6.2789	3.40985e-10	8.40136e-09	6187	RPS2
SLC29A1|ENT1|-|6p21.1|protein-coding	1001.43	2.66146	0.424483	6.2699	3.61285e-10	8.88856e-09	2030	SLC29A1
ARL15|ARFRP2|-|5q11.2|protein-coding	160.452	1.08275	0.172755	6.26752	3.66841e-10	9.01213e-09	54622	ARL15
CNTNAP3B|-|-|9p11.2|protein-coding	5.4407	5.93582	0.948197	6.26012	3.84691e-10	9.43694e-09	728577	CNTNAP3B
LRFN1|SALM2|-|19q13.2|protein-coding	16.9942	2.97028	0.474805	6.25579	3.95514e-10	9.68837e-09	57622	LRFN1
APLNR|AGTRL1|APJ|APJR|HG11|-|11q12.1|protein-coding	117.082	5.18971	0.830141	6.25161	4.06251e-10	9.93699e-09	187	APLNR
GVINP1|GVIN1|GVIN1P|VLIG-1|VLIG1|-|11p15.4|pseudo	28.8084	3.2791	0.524768	6.24867	4.13956e-10	1.01108e-08	387751	GVINP1
WWP1|AIP5|Tiul1|hSDRP1|-|8q21.3|protein-coding	710.233	1.2452	0.199289	6.24821	4.1519e-10	1.01263e-08	11059	WWP1
PRG2|BMPG|MBP|MBP1|proMBP|-|11q12.1|protein-coding	48.5575	2.82102	0.452069	6.24024	4.36896e-10	1.06404e-08	5553	PRG2
UBN1|VT|VT4|-|16p13.3|protein-coding	1331.54	0.751143	0.120456	6.23581	4.49432e-10	1.09299e-08	29855	UBN1
TADA3|ADA3|NGG1|STAF54|TADA3L|hADA3|-|3p25.3|protein-coding	1189.8	-0.422826	0.0678921	-6.2279	4.72721e-10	1.14798e-08	10474	TADA3
PHLDB2|LL5b|LL5beta|-|3q13.2|protein-coding	1746.25	1.64913	0.264947	6.22437	4.83504e-10	1.17248e-08	90102	PHLDB2
TNFAIP1|B12|B61|BTBD34|EDP1|hBACURD2|-|17q11.2|protein-coding	1488.82	1.12772	0.181249	6.22194	4.91044e-10	1.18906e-08	7126	TNFAIP1
BAZ2B|WALp4|-|2q24.2|protein-coding	538.906	1.1716	0.188457	6.21681	5.07363e-10	1.22682e-08	29994	BAZ2B
MADD|DENN|IG20|RAB3GEP|-|11p11.2|protein-coding	885.604	0.731956	0.117958	6.2052	5.46259e-10	1.31898e-08	8567	MADD
IL4R|CD124|IL-4RA|IL4RA|-|16p12.1|protein-coding	1240.19	1.19182	0.192127	6.20332	5.52844e-10	1.33298e-08	3566	IL4R
VSIG1|1700062D20Rik|GPA34|dJ889N15.1|-|Xq22.3|protein-coding	9.75929	3.46737	0.559559	6.1966	5.76947e-10	1.38911e-08	340547	VSIG1
ST3GAL6-AS1|-|-|3q12.1|ncRNA	8.84512	6.13997	0.99092	6.19622	5.78334e-10	1.39047e-08	100874207	ST3GAL6-AS1
FAM212A|C3orf54|INKA1|-|3p21.31|protein-coding	151.762	1.60303	0.259092	6.18712	6.12718e-10	1.47105e-08	389119	FAM212A
LAMB4|-|-|7q31.1|protein-coding	64.3873	3.78316	0.611615	6.18553	6.18934e-10	1.48386e-08	22798	LAMB4
RUBCN|KIAA0226|RUBICON|SCAR15|-|3q29|protein-coding	458.016	0.64293	0.103991	6.18253	6.30825e-10	1.51023e-08	9711	RUBCN
CPNE2|COPN2|CPN2|-|16q13|protein-coding	977.479	1.9507	0.3156	6.18094	6.37209e-10	1.52335e-08	221184	CPNE2
CNTNAP3P2|-|-|9q21.11|pseudo	5.27321	5.8905	0.955221	6.16663	6.97594e-10	1.66536e-08	643827	CNTNAP3P2
LINC01132|-|-|1q42.3|ncRNA	6.14283	6.11334	0.991611	6.16505	7.04591e-10	1.67969e-08	100506810	LINC01132
AGPAT2|1-AGPAT2|BSCL|BSCL1|LPAAB|LPAAT-beta|-|9q34.3|protein-coding	389.55	-0.652271	0.105874	-6.1608	7.23774e-10	1.72299e-08	10555	AGPAT2
RRAS2|TC21|-|11p15.2|protein-coding	812.569	-1.05484	0.171274	-6.15878	7.33077e-10	1.74268e-08	22800	RRAS2
KLHL6|-|-|3q27.1|protein-coding	37.3712	6.04884	0.983256	6.15185	7.65848e-10	1.81803e-08	89857	KLHL6
MAP1S|BPY2IP1|C19orf5|MAP8|VCY2IP-1|VCY2IP1|-|19p13.11|protein-coding	857.35	0.725219	0.1179	6.15113	7.69305e-10	1.82367e-08	55201	MAP1S
CDK9|C-2k|CDC2L4|CTK1|PITALRE|TAK|-|9q34.11|protein-coding	849.166	0.841708	0.136857	6.15026	7.73551e-10	1.83117e-08	1025	CDK9
TMEM206|C1orf75|-|1q32.3|protein-coding	141.634	1.17007	0.190532	6.14103	8.19861e-10	1.93808e-08	55248	TMEM206
GALNT7|GALNAC-T7|GalNAcT7|-|4q34.1|protein-coding	609.26	1.78824	0.291944	6.12528	9.05267e-10	2.13699e-08	51809	GALNT7
CERK|LK4|dA59H18.2|dA59H18.3|hCERK|-|22q13.31|protein-coding	1641.41	0.703447	0.114861	6.12433	9.10686e-10	2.14678e-08	64781	CERK
NTN4|PRO3091|-|12q22|protein-coding	1168.44	2.57216	0.420156	6.12192	9.24565e-10	2.17343e-08	59277	NTN4
THBD|AHUS6|BDCA3|CD141|THPH12|THRM|TM|-|20p11.21|protein-coding	655.028	2.77418	0.45314	6.12212	9.23377e-10	2.17343e-08	7056	THBD
DCHS1|CDH19|CDH25|CDHR6|FIB1|MVP2|PCDH16|VMLDS1|-|11p15.4|protein-coding	2461.88	1.76506	0.288416	6.11982	9.36815e-10	2.19917e-08	8642	DCHS1
MED12|ARC240|CAGH45|FGS1|HOPA|MED12S|OHDOX|OKS|OPA1|TNRC11|TRAP230|-|Xq13.1|protein-coding	898.883	0.900006	0.147136	6.11685	9.5442e-10	2.23739e-08	9968	MED12
IQCA1|4930465P12Rik|DRC11|IQCA|-|2q37.2-q37.3|protein-coding	21.6613	6.95405	1.13703	6.11597	9.59733e-10	2.24673e-08	79781	IQCA1
C17orf67|-|-|17q22|protein-coding	41.4506	1.29537	0.211834	6.11503	9.65401e-10	2.25687e-08	339210	C17orf67
IFFO2|-|-|1p36.13|protein-coding	455.083	0.739709	0.120977	6.11447	9.68786e-10	2.26166e-08	126917	IFFO2
PGM2L1|BM32A|PMMLP|-|11q13.4|protein-coding	358.287	1.72453	0.28219	6.11122	9.88718e-10	2.30501e-08	283209	PGM2L1
SUSD6|DRAGO|KIAA0247|-|14q24.1|protein-coding	1003.82	1.27523	0.208738	6.10924	1.00105e-09	2.33055e-08	9766	SUSD6
TCF15|EC2|PARAXIS|bHLHa40|-|20p13|protein-coding	6.63535	5.72339	0.937852	6.10266	1.04317e-09	2.42527e-08	6939	TCF15
WWC3|BM042|-|Xp22.2|protein-coding	1240.88	0.747544	0.122589	6.09797	1.07426e-09	2.49412e-08	55841	WWC3
GLO1|GLOD1|GLYI|HEL-S-74|-|6p21.2|protein-coding	2031.96	-0.87541	0.143593	-6.09647	1.08436e-09	2.5141e-08	2739	GLO1
RNF125|TNORS|TRAC-1|TRAC1|-|18q12.1|protein-coding	39.9451	2.49859	0.410014	6.09393	1.10172e-09	2.55087e-08	54941	RNF125
REL|C-Rel|-|2p16.1|protein-coding	167.405	1.80803	0.297086	6.08588	1.15851e-09	2.67869e-08	5966	REL
PTCHD1|AUTSX4|-|Xp22.11|protein-coding	10.403	5.88156	0.966593	6.08484	1.16611e-09	2.69257e-08	139411	PTCHD1
LY6G5C|C6orf20|G5C|LY6G5CA|LY6G5CB|NG33|-|6p21.33|protein-coding	32.8678	1.58344	0.260381	6.08124	1.19253e-09	2.74982e-08	80741	LY6G5C
CEP112|CCDC46|MACOCO|-|17q24.1|protein-coding	282.521	0.971508	0.159812	6.07905	1.20896e-09	2.7839e-08	201134	CEP112
MOCS2|MCBPE|MOCO1|MOCODB|MPTS|-|5q11.2|protein-coding	529.719	-0.535734	0.0882113	-6.0733	1.25305e-09	2.88151e-08	4338	MOCS2
CLEC14A|C14orf27|CEG1|EGFR-5|-|14q21.1|protein-coding	4697.86	4.25357	0.700573	6.07155	1.26681e-09	2.9092e-08	161198	CLEC14A
ZNF75D|D8C6|ZKSCAN24|ZNF75|ZNF82|ZSCAN28|-|Xq26.3|protein-coding	355.823	0.844295	0.13914	6.06794	1.2956e-09	2.97127e-08	7626	ZNF75D
PKHD1L1|PKHDL1|-|8q23.1-q23.2|protein-coding	230.625	6.93126	1.14254	6.06653	1.30704e-09	2.98939e-08	93035	PKHD1L1
STK10|LOK|PRO2729|-|5q35.1|protein-coding	1477.13	0.904938	0.149166	6.06666	1.30594e-09	2.98939e-08	6793	STK10
CHD3|Mi-2a|Mi2-ALPHA|ZFH|-|17p13.1|protein-coding	3425.61	0.476309	0.0785422	6.06437	1.32468e-09	3.02564e-08	1107	CHD3
PIR|-|-|Xp22.2|protein-coding	127.513	2.32232	0.383033	6.06296	1.33637e-09	3.04821e-08	8544	PIR
LAMC2|B2T|BM600|CSF|EBR2|EBR2A|LAMB2T|LAMNB2|-|1q25.3|protein-coding	550.216	2.43075	0.402404	6.04057	1.53572e-09	3.49822e-08	3918	LAMC2
MIR1182|MIRN1182|hsa-mir-1182|-|1q42.2|ncRNA	24.1581	4.68863	0.777451	6.03078	1.63174e-09	3.71194e-08	100302132	MIR1182
RELL1|-|-|4p14|protein-coding	351.525	1.68186	0.278901	6.03029	1.63662e-09	3.71804e-08	768211	RELL1
RANBP10|-|-|16q22.1|protein-coding	424.314	0.695135	0.115281	6.02989	1.64072e-09	3.72235e-08	57610	RANBP10
SFXN5|BBG-TCC|-|2p13.2|protein-coding	340.108	0.694936	0.115294	6.02751	1.66505e-09	3.77248e-08	94097	SFXN5
BAHD1|-|-|15q15.1|protein-coding	508.787	0.545919	0.0905831	6.02672	1.67318e-09	3.78582e-08	22893	BAHD1
AGER|RAGE|SCARJ1|-|6p21.32|protein-coding	135.708	1.40734	0.233934	6.01597	1.78817e-09	4.0406e-08	177	AGER
MFAP3|-|-|5q33.2|protein-coding	1085.04	1.04239	0.173289	6.01532	1.79527e-09	4.05123e-08	4238	MFAP3
CASC18|-|-|12q23.3|ncRNA	9.30128	3.96378	0.659623	6.00916	1.86487e-09	4.20266e-08	101929110	CASC18
METTL4|HsT661|-|18p11.32|protein-coding	299.051	1.44567	0.24067	6.00683	1.89183e-09	4.25775e-08	64863	METTL4
ATG16L2|ATG16B|WDR80|-|11q13.4|protein-coding	296.77	1.06549	0.177614	5.99892	1.98639e-09	4.46462e-08	89849	ATG16L2
NLRP12|CLR19.3|FCAS2|NALP12|PAN6|PYPAF7|RNO|RNO2|-|19q13.42|protein-coding	6.78349	6.24963	1.04252	5.99474	2.03816e-09	4.57489e-08	91662	NLRP12
ARHGAP31|AOS1|CDGAP|-|3q13.32-q13.33|protein-coding	1175.4	1.79426	0.299338	5.99411	2.04607e-09	4.58292e-08	57514	ARHGAP31
AGAP3|AGAP-3|CENTG3|CRAG|MRIP-1|cnt-g3|-|7q36.1|protein-coding	1147.42	0.885381	0.147711	5.99402	2.04716e-09	4.58292e-08	116988	AGAP3
FGF16|FGF-16|MF4|-|Xq21.1|protein-coding	12.572	5.67497	0.947173	5.99149	2.0793e-09	4.64871e-08	8823	FGF16
TM4SF1|H-L6|L6|M3S1|TAAL6|-|3q25.1|protein-coding	2899.52	2.81514	0.470054	5.98898	2.11166e-09	4.71483e-08	4071	TM4SF1
RAMP2-AS1|-|-|17q21.2|ncRNA	16.5895	3.39397	0.567055	5.98525	2.16053e-09	4.81759e-08	100190938	RAMP2-AS1
LGALSL|GRP|HSPC159|-|2p14|protein-coding	51.6452	2.21102	0.36962	5.98187	2.20593e-09	4.91234e-08	29094	LGALSL
TLE2|ESG|ESG2|GRG2|-|19p13.3|protein-coding	413.214	2.25271	0.376682	5.9804	2.22591e-09	4.9503e-08	7089	TLE2
NSMCE1|NSE1|-|16p12.1|protein-coding	556.915	-0.609926	0.102068	-5.97569	2.29113e-09	5.08866e-08	197370	NSMCE1
PDCL|PhLP|-|9q33.2|protein-coding	432.852	1.20889	0.20233	5.97483	2.30331e-09	5.10899e-08	5082	PDCL
HAGLR|HOXD-AS1|Mdgt|-|2q31.1|ncRNA	293.054	2.55046	0.42698	5.97325	2.32573e-09	5.15197e-08	401022	HAGLR
NEDD4L|NEDD4-2|NEDD4.2|PVNH7|RSP5|hNEDD4-2|-|18q21.31|protein-coding	233.816	1.95444	0.327792	5.96243	2.48508e-09	5.49775e-08	23327	NEDD4L
C6orf120|-|-|6q27|protein-coding	769.955	-0.792309	0.132895	-5.96192	2.4929e-09	5.50785e-08	387263	C6orf120
TMC1|DFNA36|DFNB11|DFNB7|-|9q21.13|protein-coding	9.65696	3.80184	0.63792	5.95975	2.52623e-09	5.57419e-08	117531	TMC1
MIR6891|hsa-mir-6891|-|6p21.33|ncRNA	107.118	1.41205	0.236955	5.95914	2.53562e-09	5.58763e-08	102465537	MIR6891
CD44|CDW44|CSPG8|ECMR-III|HCELL|HUTCH-I|IN|LHR|MC56|MDU2|MDU3|MIC4|Pgp1|-|11p13|protein-coding	9514.84	-0.955806	0.160459	-5.95671	2.57365e-09	5.66404e-08	960	CD44
CDS2|-|-|20p12.3|protein-coding	1127.73	0.835357	0.140248	5.95627	2.5806e-09	5.67195e-08	8760	CDS2
MPP4|ALS2CR5|DLG6|-|2q33.1|protein-coding	132.838	1.9797	0.332476	5.95441	2.61016e-09	5.72947e-08	58538	MPP4
MFSD6|MMR2|hMMR2|-|2q32.2|protein-coding	291.834	1.85135	0.311188	5.94929	2.69311e-09	5.90389e-08	54842	MFSD6
CASC15|LINC00340|-|6p22.3|ncRNA	14.1453	4.82552	0.812044	5.94244	2.80814e-09	6.14809e-08	401237	CASC15
NDST1|HSST|MRT46|NST1|-|5q33.1|protein-coding	5577.62	0.859396	0.144681	5.93995	2.85108e-09	6.22597e-08	3340	NDST1
SIN3B|-|-|19p13.11|protein-coding	1599.66	1.25176	0.210733	5.94002	2.84984e-09	6.22597e-08	23309	SIN3B
PLEKHA7|-|-|11p15.2-p15.1|protein-coding	17.0264	3.42824	0.577391	5.93746	2.89467e-09	6.313e-08	144100	PLEKHA7
ACER2|ALKCDase2|ASAH3L|-|9p22.1|protein-coding	43.3398	2.81836	0.476013	5.92076	3.20458e-09	6.97987e-08	340485	ACER2
CASP7|CASP-7|CMH-1|ICE-LAP3|LICE2|MCH3|-|10q25.3|protein-coding	657.369	1.07971	0.182445	5.918	3.25877e-09	7.07968e-08	840	CASP7
EPHA2|ARCC2|CTPA|CTPP1|CTRCT6|ECK|-|1p36.13|protein-coding	821.516	2.12814	0.359604	5.918	3.25878e-09	7.07968e-08	1969	EPHA2
ANXA2R|AX2R|AXIIR|C5orf39|-|5p12|protein-coding	46.7969	2.03196	0.343545	5.91467	3.32533e-09	7.20574e-08	389289	ANXA2R
PCLO|ACZ|PCH3|-|7q21.11|protein-coding	10.8601	4.41458	0.746353	5.91487	3.32136e-09	7.20574e-08	27445	PCLO
GOLGA8H|GOLGA6L11|-|15q13.2|protein-coding	4.63382	5.70781	0.965372	5.91255	3.36853e-09	7.29e-08	728498	GOLGA8H
BMP6|VGR|VGR1|-|6p24.3|protein-coding	556.783	3.21123	0.543345	5.91011	3.41881e-09	7.38935e-08	654	BMP6
CNKSR3|MAGI1|-|6q25.2|protein-coding	170.247	1.24272	0.210298	5.90934	3.43476e-09	7.41435e-08	154043	CNKSR3
KLHL2|ABP-KELCH|MAV|MAYVEN|-|4q32.3|protein-coding	363.219	1.21265	0.205268	5.90763	3.47071e-09	7.48238e-08	11275	KLHL2
SHROOM2|APXL|HSAPXL|-|Xp22.2|protein-coding	229.715	3.03494	0.513768	5.90722	3.47923e-09	7.4912e-08	357	SHROOM2
TACC1|Ga55|-|8p11.22|protein-coding	4109.72	0.903699	0.153202	5.89874	3.66282e-09	7.87646e-08	6867	TACC1
ARPP21|ARPP-21|R3HDM3|RCS|TARPP|-|3p22.3|protein-coding	9.74169	6.28252	1.06592	5.89401	3.76937e-09	8.09528e-08	10777	ARPP21
MID2|FXY2|MRX101|RNF60|TRIM1|-|Xq22.3|protein-coding	480.671	1.54886	0.262998	5.88923	3.88001e-09	8.32233e-08	11043	MID2
EEF2K|HSU93850|eEF-2K|-|16p12.2|protein-coding	973.319	1.00789	0.171177	5.88803	3.90827e-09	8.37231e-08	29904	EEF2K
ZZEF1|ZZZ4|-|17p13.2|protein-coding	1098.07	0.544293	0.0924669	5.88636	3.94801e-09	8.44674e-08	23140	ZZEF1
SYTL4|SLP4|-|Xq22.1|protein-coding	153.871	2.2239	0.378036	5.88279	4.03413e-09	8.62008e-08	94121	SYTL4
LRRC1|LANO|dJ523E19.1|-|6p12.1|protein-coding	118.256	1.99731	0.339635	5.88076	4.08393e-09	8.71548e-08	55227	LRRC1
CIDEB|-|-|14q12|protein-coding	63.2314	1.85706	0.315801	5.88048	4.0907e-09	8.71891e-08	27141	CIDEB
CEACAM21|CEACAM3|R29124_1|-|19q13.2|protein-coding	10.3059	6.36585	1.08274	5.87939	4.11782e-09	8.76568e-08	90273	CEACAM21
RASSF2|CENP-34|RASFADIN|-|20p13|protein-coding	1053.59	3.22326	0.548334	5.87827	4.14575e-09	8.81402e-08	9770	RASSF2
RNF122|-|-|8p12|protein-coding	82.0641	1.56089	0.2657	5.87463	4.2379e-09	8.99862e-08	79845	RNF122
VEGFC|Flt4-L|LMPH1D|VRP|-|4q34.3|protein-coding	561.115	-1.09821	0.187021	-5.87212	4.30245e-09	9.12421e-08	7424	VEGFC
ABCG2|ABC15|ABCP|BCRP|BCRP1|BMDP|CD338|CDw338|EST157481|GOUT1|MRX|MXR|MXR-1|MXR1|UAQTL1|-|4q22.1|protein-coding	73.146	4.21392	0.717954	5.86935	4.37509e-09	9.26665e-08	9429	ABCG2
PTPRN2|IA-2beta|IAR|ICAAR|PTPRP|R-PTP-N2|-|7q36.3|protein-coding	52.1234	2.14824	0.366098	5.86795	4.41223e-09	9.3336e-08	5799	PTPRN2
TNFRSF14|ATAR|CD270|HVEA|HVEM|LIGHTR|TR2|-|1p36.32|protein-coding	489.744	1.58232	0.2698	5.86479	4.49695e-09	9.50094e-08	8764	TNFRSF14
SEMA3D|Sema-Z2|coll-2|-|7q21.11|protein-coding	54.7195	3.58424	0.611592	5.86052	4.61432e-09	9.73674e-08	223117	SEMA3D
LNX2|PDZRN1|-|13q12.2|protein-coding	129.958	0.958065	0.163539	5.85832	4.67582e-09	9.85419e-08	222484	LNX2
TAF1C|MGC:39976|SL1|TAFI110|TAFI95|-|16q24.1|protein-coding	773.3	0.693711	0.118419	5.85808	4.68252e-09	9.85603e-08	9013	TAF1C
SH3BP2|3BP-2|3BP2|CRBM|CRPM|RES4-23|-|4p16.3|protein-coding	1971.28	1.32346	0.225943	5.85752	4.69824e-09	9.87683e-08	6452	SH3BP2
DGKZ|DAGK5|DAGK6|DGK-ZETA|hDGKzeta|-|11p11.2|protein-coding	391.018	1.08619	0.185474	5.85627	4.73366e-09	9.93893e-08	8525	DGKZ
PFKFB3|IPFK2|PFK2|iPFK-2|-|10p15.1|protein-coding	1109.64	1.18738	0.202897	5.85215	4.8526e-09	1.01634e-07	5209	PFKFB3
GPR143|NYS6|OA1|-|Xp22.2|protein-coding	18.288	5.48105	0.936584	5.85217	4.85212e-09	1.01634e-07	4935	GPR143
DACH1|DACH|-|13q21.33|protein-coding	7.78319	5.95315	1.01791	5.84838	4.96394e-09	1.03837e-07	1602	DACH1
GAK|DNAJ26|DNAJC26|-|4p16.3|protein-coding	1282.4	0.531229	0.0908715	5.84593	5.03732e-09	1.05242e-07	2580	GAK
TMEM156|-|-|4p14|protein-coding	13.8285	5.0675	0.86705	5.84452	5.08016e-09	1.06006e-07	80008	TMEM156
DHX32|DDX32|DHLP1|-|10q26.2|protein-coding	652.77	1.05281	0.180364	5.83716	5.30976e-09	1.1066e-07	55760	DHX32
RMDN1|CGI-90|FAM82B|RMD-1|RMD1|-|8q21.3|protein-coding	822.563	-0.571352	0.0978977	-5.83621	5.34003e-09	1.11154e-07	51115	RMDN1
GAB2|-|-|11q14.1|protein-coding	643.494	1.49466	0.256198	5.83401	5.41105e-09	1.12494e-07	9846	GAB2
PDE6G|PDEG|RP57|-|17q25.3|protein-coding	11.5372	4.27521	0.73286	5.83361	5.42423e-09	1.12629e-07	5148	PDE6G
FLNB|ABP-278|ABP-280|AOI|FH1|FLN-B|FLN1L|LRS1|SCT|TABP|TAP|-|3p14.3|protein-coding	7617.62	2.21087	0.379078	5.83222	5.46937e-09	1.13427e-07	2317	FLNB
NAMPT|1110035O14Rik|PBEF|PBEF1|VF|VISFATIN|-|7q22.3|protein-coding	1001.06	1.88421	0.323118	5.83134	5.49853e-09	1.13892e-07	10135	NAMPT
GRAMD1A|KIAA1533|-|19q13.11|protein-coding	1067.18	1.06479	0.182664	5.82922	5.56863e-09	1.15203e-07	57655	GRAMD1A
HOMER3|HOMER-3|VESL3|-|19p13.11|protein-coding	1671.82	1.63238	0.280373	5.82218	5.8086e-09	1.20021e-07	9454	HOMER3
MYH10|NMMHC-IIB|NMMHCB|-|17p13.1|protein-coding	2650.51	1.15496	0.198415	5.82093	5.85212e-09	1.20772e-07	4628	MYH10
GABRP|-|-|5q35.1|protein-coding	5.47918	5.94011	1.02071	5.81959	5.89921e-09	1.21596e-07	2568	GABRP
ADAMTSL3|ADAMTSL-3|-|15q25.2|protein-coding	33.6405	5.32814	0.916714	5.81221	6.16524e-09	1.26924e-07	57188	ADAMTSL3
NLK|-|-|17q11.2|protein-coding	306.999	1.47006	0.253126	5.80763	6.33627e-09	1.30287e-07	51701	NLK
THOC7|NIF3L1BP1|fSAP24|hTREX30|-|3p14.1|protein-coding	580.899	-0.665453	0.114587	-5.80742	6.34431e-09	1.30294e-07	80145	THOC7
LINC01583|-|-|15q25.2|ncRNA	20.3295	3.69802	0.636907	5.80621	6.39029e-09	1.31078e-07	101929690	LINC01583
PRAG1|NACK|PEAK2|PRAGMIN|SGK223|-|8p23.1|protein-coding	236.843	2.711	0.467004	5.8051	6.43289e-09	1.31792e-07	157285	PRAG1
BTG2|APRO1|PC3|TIS21|-|1q32.1|protein-coding	910.899	2.43912	0.420491	5.80064	6.60622e-09	1.3518e-07	7832	BTG2
BEND6|C6orf65|-|6p12.1|protein-coding	153.911	-1.09428	0.18875	-5.79749	6.73131e-09	1.37573e-07	221336	BEND6
BAG2|BAG-2|dJ417I1.2|-|6p12.1|protein-coding	526.4	-1.3646	0.235533	-5.79366	6.88699e-09	1.40584e-07	9532	BAG2
FAM110D|GRRP1|-|1p36.11|protein-coding	11.2031	5.99731	1.03534	5.79262	6.92976e-09	1.41287e-07	79927	FAM110D
MICALL2|JRAB|MICAL-L2|-|7p22.3|protein-coding	793.225	0.716154	0.123735	5.78782	7.13048e-09	1.45204e-07	79778	MICALL2
ZSWIM4|-|-|19p13.13-p13.12|protein-coding	336.882	1.73214	0.29949	5.78362	7.31093e-09	1.487e-07	65249	ZSWIM4
TIMM9|TIM9|TIM9A|-|14q23.1|protein-coding	335.179	-0.635976	0.109998	-5.78171	7.39443e-09	1.50217e-07	26520	TIMM9
FOXD1|FKHL8|FREAC-4|FREAC4|-|5q13.2|protein-coding	348.109	-1.41711	0.245254	-5.77813	7.55348e-09	1.53264e-07	2297	FOXD1
EEF1D|EF-1D|EF1D|FP1047|-|8q24.3|protein-coding	3168.51	-0.442688	0.0768467	-5.76067	8.37823e-09	1.69795e-07	1936	EEF1D
IAH1|-|-|2p25.1|protein-coding	608.653	-1.17307	0.204042	-5.74915	8.96957e-09	1.81561e-07	285148	IAH1
CEACAM1|BGP|BGP1|BGPI|-|19q13.2|protein-coding	13.2281	4.9963	0.869255	5.7478	9.04139e-09	1.82796e-07	634	CEACAM1
CEP68|KIAA0582|-|2p14|protein-coding	709.671	1.28133	0.223003	5.74577	9.15043e-09	1.8478e-07	23177	CEP68
ARHGEF3|GEF3|STA3|XPLN|-|3p14.3|protein-coding	263.012	2.27757	0.396545	5.74352	9.27261e-09	1.87023e-07	50650	ARHGEF3
MYL4|ALC1|AMLC|GT1|PRO1957|-|17q21.32|protein-coding	6.36143	5.66173	0.986057	5.74178	9.36842e-09	1.88731e-07	4635	MYL4
DPEP1|MBD1|MDP|RDP|-|16q24.3|protein-coding	27.3988	3.95073	0.688235	5.74038	9.44625e-09	1.89999e-07	1800	DPEP1
CTNND1|CAS|CTNND|P120CAS|P120CTN|p120|p120(CAS)|p120(CTN)|-|11q12.1|protein-coding	5026.65	0.934032	0.162716	5.74025	9.45387e-09	1.89999e-07	1500	CTNND1
EMC4|PIG17|TMEM85|-|15q14|protein-coding	829.165	-0.528306	0.0921563	-5.73271	9.88367e-09	1.98401e-07	51234	EMC4
GPR4|-|-|19q13.32|protein-coding	222.425	3.65944	0.638416	5.73205	9.92218e-09	1.98702e-07	2828	GPR4
TRAK1|MILT1|OIP106|-|3p22.1|protein-coding	836.668	0.688057	0.120034	5.73219	9.91431e-09	1.98702e-07	22906	TRAK1
EDC3|LSM16|MRT50|YJDC|YJEFN2|-|15q24.1|protein-coding	670.399	0.627737	0.109583	5.72842	1.01371e-08	2.02767e-07	80153	EDC3
TMEM200B|TTMB|-|1p35.3|protein-coding	253.745	-1.20857	0.211035	-5.72686	1.02309e-08	2.044e-07	399474	TMEM200B
SKAP1|HEL-S-81p|SCAP1|SKAP55|-|17q21.32|protein-coding	9.50469	4.84076	0.845568	5.72486	1.0352e-08	2.06576e-07	8631	SKAP1
OSBPL9|ORP-9|ORP9|-|1p32.3|protein-coding	737.325	0.585078	0.102219	5.72379	1.04174e-08	2.07635e-07	114883	OSBPL9
NFATC1|NF-ATC|NF-ATc1.2|NFAT2|NFATc|-|18q23|protein-coding	252.697	1.36496	0.238776	5.71649	1.08746e-08	2.16493e-07	4772	NFATC1
SWAP70|HSPC321|SWAP-70|-|11p15.4|protein-coding	1898.88	0.828493	0.144983	5.7144	1.10091e-08	2.18914e-07	23075	SWAP70
TOR2A|TORP1|-|9q34.11|protein-coding	118.926	0.964799	0.168848	5.71401	1.10344e-08	2.19159e-07	27433	TOR2A
SRCAP|DOMO1|EAF1|FLHS|SWR1|-|16p11.2|protein-coding	1520.43	0.519043	0.0908577	5.7127	1.11197e-08	2.20593e-07	10847	SRCAP
LOC100128288|-|-|17p13.1|ncRNA	60.3226	1.64348	0.288109	5.70437	1.16771e-08	2.3138e-07	100128288	LOC100128288
NYAP1|C7orf51|-|7q22.1|protein-coding	63.4003	1.95785	0.343441	5.7007	1.19318e-08	2.36149e-07	222950	NYAP1
COPS2|ALIEN|CSN2|SGN2|TRIP15|-|15q21.1|protein-coding	1242.47	-0.524763	0.092076	-5.69924	1.20344e-08	2.37841e-07	9318	COPS2
STAP2|BKS|-|19p13.3|protein-coding	89.5164	1.64576	0.288776	5.69908	1.20455e-08	2.37841e-07	55620	STAP2
TANC1|ROLSB|TANC|-|2q24.2|protein-coding	1149.12	1.07889	0.189472	5.69421	1.23944e-08	2.44446e-07	85461	TANC1
CMIP|TCMIP|-|16q23.2-q23.3|protein-coding	907.36	1.3471	0.236693	5.69133	1.26057e-08	2.48323e-07	80790	CMIP
SNRPD2|SMD2|SNRPD1|Sm-D2|-|19q13.32|protein-coding	1391.65	-0.700556	0.123123	-5.68989	1.27119e-08	2.50125e-07	6633	SNRPD2
C5orf38|CEI|IRX2NB|-|5p15.33|protein-coding	79.4684	-1.3243	0.232787	-5.68889	1.27871e-08	2.51311e-07	153571	C5orf38
MAP3K20|AZK|MLK7|MLT|MLTK|MLTKalpha|MLTKbeta|MRK|SFMMP|ZAK|mlklak|pk|-|2q31.1|protein-coding	1759.93	-0.822925	0.144766	-5.68453	1.31176e-08	2.57507e-07	51776	MAP3K20
GATS|STAG3OS|-|7q22.1|protein-coding	161.214	1.36523	0.240209	5.68351	1.31954e-08	2.58735e-07	352954	GATS
RPS14|EMTB|S14|-|5q33.1|protein-coding	7277.68	-0.556981	0.0981399	-5.67538	1.38382e-08	2.71024e-07	6208	RPS14
LAMA5|-|-|20q13.33|protein-coding	3068.61	2.76288	0.487022	5.673	1.4032e-08	2.74501e-07	3911	LAMA5
TMEM263|C12orf23|-|12q23.3|protein-coding	1355.78	-0.776218	0.13688	-5.6708	1.42135e-08	2.7773e-07	90488	TMEM263
WWTR1|TAZ|-|3q25.1|protein-coding	3293.72	0.93938	0.16567	5.67019	1.42641e-08	2.78397e-07	25937	WWTR1
TEAD3|DTEF-1|ETFR-1|TEAD-3|TEAD5|TEF-5|TEF5|-|6p21.31|protein-coding	515.429	-1.09637	0.19337	-5.66981	1.42957e-08	2.78692e-07	7005	TEAD3
FRAT2|-|-|10q24.1|protein-coding	110.597	0.910718	0.160708	5.6669	1.45405e-08	2.83138e-07	23401	FRAT2
TMX2-CTNND1|-|-|11q12.1|ncRNA	5065.56	0.91486	0.161477	5.66559	1.46523e-08	2.84987e-07	100528016	TMX2-CTNND1
AKTIP|FT1|FTS|-|16q12.2|protein-coding	227.048	1.04742	0.184887	5.6652	1.46854e-08	2.85302e-07	64400	AKTIP
CHD8|AUTS18|HELSNF1|-|14q11.2|protein-coding	1324.01	0.53517	0.094531	5.66132	1.50213e-08	2.91493e-07	57680	CHD8
MPLKIP|ABHS|C7orf11|ORF20|TTD4|-|7p14.1|protein-coding	327.412	-0.721409	0.127509	-5.65772	1.53396e-08	2.97328e-07	136647	MPLKIP
THG1L|ICF45|IHG-1|hTHG1|-|5q33.3|protein-coding	254.966	-0.652724	0.115427	-5.65486	1.55971e-08	3.01972e-07	54974	THG1L
ANAPC13|APC13|SWM1|-|3q22.2|protein-coding	864.056	-0.766281	0.135559	-5.65275	1.57904e-08	3.05365e-07	25847	ANAPC13
NOP16|HSPC111|HSPC185|-|5q35.2|protein-coding	313.705	-0.841896	0.149014	-5.64979	1.60647e-08	3.10314e-07	51491	NOP16
UAP1L1|-|-|9q34.3|protein-coding	474.612	0.627638	0.111154	5.64654	1.63709e-08	3.15869e-07	91373	UAP1L1
DNAJC5|CLN4|CLN4B|CSP|DNAJC5A|NCL|mir-941-2|mir-941-3|mir-941-4|mir-941-5|-|20q13.33|protein-coding	1719	0.631436	0.1119	5.64287	1.67238e-08	3.22192e-07	80331	DNAJC5
PBX2|G17|HOX12|PBX2MHC|-|6p21.32|protein-coding	1017.55	0.710701	0.12595	5.64274	1.67368e-08	3.22192e-07	5089	PBX2
ARL4C|ARL7|LAK|-|2q37.1|protein-coding	931.017	2.19911	0.39004	5.63817	1.71864e-08	3.30472e-07	10123	ARL4C
CFI|AHUS3|ARMD13|C3BINA|C3b-INA|FI|IF|KAF|-|4q25|protein-coding	8.96428	5.6676	1.0057	5.6355	1.74555e-08	3.35266e-07	3426	CFI
MGAT5|GNT-V|GNT-VA|-|2q21.2-q21.3|protein-coding	2556.01	1.29499	0.230274	5.62369	1.8692e-08	3.58606e-07	4249	MGAT5
MRPL40|L40mt|MRP-L22|MRP-L40|MRPL22|NLVCF|URIM|-|22q11.21|protein-coding	343.252	-0.731048	0.130065	-5.62065	1.90246e-08	3.64573e-07	64976	MRPL40
CCDC69|-|-|5q33.1|protein-coding	129.226	3.18441	0.567415	5.61213	1.99852e-08	3.82548e-07	26112	CCDC69
NPFF|FMRFAL|-|12q13.13|protein-coding	50.1223	1.20817	0.215407	5.6088	2.03736e-08	3.89542e-07	8620	NPFF
CDC42SE1|SCIP1|SPEC1|-|1q21.3|protein-coding	1620.93	0.406335	0.0724733	5.60669	2.06229e-08	3.93862e-07	56882	CDC42SE1
REEP2|C5orf19|SGC32445|SPG72|Yip2d|-|5q31.2|protein-coding	242.25	-1.05268	0.187802	-5.60529	2.07905e-08	3.96614e-07	51308	REEP2
IP6K1|IHPK1|PiUS|-|3p21.31|protein-coding	925.352	0.638164	0.113903	5.6027	2.11036e-08	4.02134e-07	9807	IP6K1
ANGEL1|Ccr4e|KIAA0759|-|14q24.3|protein-coding	528.83	1.34662	0.240465	5.60006	2.14281e-08	4.07857e-07	23357	ANGEL1
DDX49|R27090_2|-|19p13.11|protein-coding	455.86	-0.60215	0.107646	-5.59382	2.22132e-08	4.22325e-07	54555	DDX49
AKAP2|AKAP-2|AKAPKL|MISP2|PRKA2|-|9q31.3|protein-coding	6022.84	0.660771	0.118221	5.58927	2.28022e-08	4.33037e-07	11217	AKAP2
ZBTB18|C2H2-171|MRD22|RP58|TAZ-1|ZNF238|-|1q44|protein-coding	381.817	1.71055	0.30643	5.5822	2.37491e-08	4.50009e-07	10472	ZBTB18
CTNNB1|CTNNB|MRD19|armadillo|-|3p22.1|protein-coding	5277.56	0.671648	0.120317	5.58232	2.37333e-08	4.50009e-07	1499	CTNNB1
CRY1|PHLL1|-|12q23.3|protein-coding	236.828	1.1455	0.205234	5.58142	2.38559e-08	4.51525e-07	1407	CRY1
MORN2|BLOCK27|MOPT|-|2p22.1|protein-coding	138.207	-0.823589	0.147586	-5.58039	2.39978e-08	4.53703e-07	729967	MORN2
FAM221A|C7orf46|-|7p15.3|protein-coding	10.9174	3.82829	0.686492	5.5766	2.45266e-08	4.63182e-07	340277	FAM221A
TMEM163|DC29|SV31|-|2q21.3|protein-coding	19.835	5.59639	1.00387	5.57482	2.47786e-08	4.6742e-07	81615	TMEM163
NLRC3|CLR16.2|NOD3|-|16p13.3|protein-coding	11.0929	4.72704	0.848002	5.57433	2.48489e-08	4.68223e-07	197358	NLRC3
LOC728715|-|-|12p13.31|ncRNA	9.18064	3.93763	0.706947	5.56992	2.54859e-08	4.79692e-07	728715	LOC728715
MBOAT7|BB1|LENG4|LPIAT|LRC4|MBOA7|MRT57|OACT7|hMBOA-7|-|19q13.42|protein-coding	1550.56	0.787505	0.141425	5.56834	2.57175e-08	4.83512e-07	79143	MBOAT7
MRPL4|CGI-28|L4mt|-|19p13.2|protein-coding	643.908	-0.502151	0.0902022	-5.56695	2.59239e-08	4.8685e-07	51073	MRPL4
DAPK3|DLK|ZIP|ZIPK|-|19p13.3|protein-coding	1059.93	0.568462	0.102245	5.55982	2.70054e-08	5.06599e-07	1613	DAPK3
RFK|RIFK|-|9q21.13|protein-coding	451.778	1.1077	0.199266	5.55891	2.71471e-08	5.08693e-07	55312	RFK
HYI|HT036|-|1p34.2|protein-coding	266.805	1.37976	0.248452	5.55342	2.80131e-08	5.24338e-07	81888	HYI
BCAS4|CNOL|-|20q13.13|protein-coding	87.1172	-1.48463	0.267415	-5.55177	2.82788e-08	5.28726e-07	55653	BCAS4
HEATR5B|-|-|2p22.2|protein-coding	717.919	0.651053	0.117342	5.54834	2.88399e-08	5.38621e-07	54497	HEATR5B
NAA20|NAT3|NAT3P|NAT5|NAT5P|dJ1002M8.1|-|20p11.23|protein-coding	793.3	-0.640851	0.115556	-5.54583	2.92571e-08	5.45809e-07	51126	NAA20
PALM|-|-|19p13.3|protein-coding	52.4512	3.28494	0.593027	5.53927	3.03727e-08	5.65997e-07	5064	PALM
LOC101927190|-|-|5q23.1|ncRNA	4.12013	5.53116	1.00059	5.52788	3.24132e-08	6.03356e-07	101927190	LOC101927190
CD164|DFNA66|MGC-24|MGC-24v|MUC-24|endolyn|-|6q21|protein-coding	3352.24	-0.672304	0.121658	-5.52616	3.27311e-08	6.08604e-07	8763	CD164
UFM1|BM-002|C13orf20|-|13q13.3|protein-coding	1731.46	-0.647238	0.117271	-5.51916	3.4063e-08	6.32674e-07	51569	UFM1
PALM2-AKAP2|AKAP2|-|9q31.3|protein-coding	6050.61	0.652509	0.118254	5.51785	3.43172e-08	6.36695e-07	445815	PALM2-AKAP2
RPL18|L18|-|19q13.33|protein-coding	7612.07	-0.724635	0.131477	-5.51151	3.55769e-08	6.59343e-07	6141	RPL18
TMEM44|-|-|3q29|protein-coding	570.903	1.11812	0.203036	5.50699	3.65026e-08	6.75758e-07	93109	TMEM44
LOC100505938|-|-|7p21.3|ncRNA	5.51117	5.45658	0.990929	5.50652	3.65987e-08	6.76795e-07	100505938	LOC100505938
PRRC2B|BAT2L|BAT2L1|KIAA0515|LQFBS-1|-|9q34.13|protein-coding	4426.8	0.619171	0.112556	5.50101	3.77622e-08	6.97548e-07	84726	PRRC2B
ZFPM2|DIH3|FOG2|SRXY9|ZC2HC11B|ZNF89B|hFOG-2|-|8q23.1|protein-coding	140.545	2.73549	0.497924	5.49379	3.93401e-08	7.25902e-07	23414	ZFPM2
LMBR1L|LIMR|-|12q13.12|protein-coding	507.608	1.1645	0.212013	5.49259	3.96079e-08	7.30046e-07	55716	LMBR1L
NYNRIN|CGIN1|KIAA1305|-|14q12|protein-coding	930.475	1.30799	0.238274	5.48944	4.03218e-08	7.42395e-07	57523	NYNRIN
FNIP2|FNIPL|MAPO1|-|4q32.1|protein-coding	297.744	0.928918	0.169433	5.48251	4.19326e-08	7.71214e-07	57600	FNIP2
FLJ34503|-|-|6q21|ncRNA	9.03952	6.17588	1.12675	5.48116	4.22551e-08	7.76301e-07	285759	FLJ34503
CECR1|ADA2|ADGF|IDGFL|PAN|SNEDS|-|22q11.1|protein-coding	51.6755	1.60545	0.293017	5.47905	4.27615e-08	7.84749e-07	51816	CECR1
STARD8|ARHGAP38|DLC3|STARTGAP3|-|Xq13.1|protein-coding	314.821	1.95274	0.356577	5.47634	4.34211e-08	7.9599e-07	9754	STARD8
COA4|CHCHD8|CMC3|E2IG2|-|11q13.4|protein-coding	471.476	-0.757303	0.138354	-5.47368	4.40796e-08	8.07187e-07	51287	COA4
NEIL1|FPG1|NEI1|hFPG1|-|15q24.2|protein-coding	131.096	1.91978	0.350788	5.47276	4.43086e-08	8.10503e-07	79661	NEIL1
PLEKHA8|FAPP2|-|7p14.3|protein-coding	332.311	1.12985	0.206751	5.46475	4.63559e-08	8.47035e-07	84725	PLEKHA8
USP54|C10orf29|bA137L10.3|bA137L10.4|-|10q22.2|protein-coding	162.996	1.0616	0.19456	5.45642	4.85818e-08	8.86748e-07	159195	USP54
VILL|-|-|3p22.2|protein-coding	127.63	1.10943	0.203375	5.45507	4.89532e-08	8.92565e-07	50853	VILL
DRAP1|NC2-alpha|-|11q13.1|protein-coding	2481.38	-1.08119	0.19829	-5.45257	4.96465e-08	9.0423e-07	10589	DRAP1
LTF|GIG12|HEL110|HLF2|LF|-|3p21.31|protein-coding	11.415	6.02288	1.10501	5.45053	5.02212e-08	9.13712e-07	4057	LTF
IFIT5|ISG58|P58|RI58|-|10q23.31|protein-coding	424.065	-0.717528	0.131811	-5.4436	5.22136e-08	9.4894e-07	24138	IFIT5
RNF7|CKBBP1|ROC2|SAG|-|3q23|protein-coding	956.042	-0.433357	0.0796202	-5.44279	5.2451e-08	9.52189e-07	9616	RNF7
SCAMP2|-|-|15q24.1|protein-coding	1136.93	0.54641	0.100395	5.44261	5.25051e-08	9.52189e-07	10066	SCAMP2
BATF|B-ATF|BATF1|SFA-2|SFA2|-|14q24.3|protein-coding	4.19145	5.56365	1.02413	5.43258	5.55458e-08	1.00625e-06	10538	BATF
PIK3R3|p55|p55-GAMMA|p55PIK|-|1p34.1|protein-coding	264.473	1.53516	0.282596	5.43234	5.56184e-08	1.00649e-06	8503	PIK3R3
NRN1|NRN|dJ380B8.2|-|6p25.1|protein-coding	2285.06	-1.05271	0.194089	-5.42385	5.83284e-08	1.0544e-06	51299	NRN1
RALGDS|RGDS|RGF|RalGEF|-|9q34.13-q34.2|protein-coding	1001.45	1.43724	0.265104	5.42144	5.912e-08	1.06757e-06	5900	RALGDS
GATA2-AS1|-|-|3q21.3|ncRNA	52.7008	2.14198	0.395374	5.41761	6.04019e-08	1.08956e-06	101927167	GATA2-AS1
IRF7|IMD39|IRF-7H|IRF7A|IRF7B|IRF7C|IRF7H|-|11p15.5|protein-coding	141.229	1.0977	0.20271	5.4151	6.12561e-08	1.10379e-06	3665	IRF7
HTR1B|5-HT-1B|5-HT-1D-beta|5-HT1B|5-HT1DB|HTR1D2|HTR1DB|S12|-|6q14.1|protein-coding	26.827	3.88876	0.71835	5.41347	6.18156e-08	1.11268e-06	3351	HTR1B
TEP1|TLP1|TP1|TROVE1|VAULT2|p240|-|14q11.2|protein-coding	852.727	1.05378	0.194756	5.41075	6.27614e-08	1.1285e-06	7011	TEP1
NPM3|PORMIN|TMEM123|-|10q24.32|protein-coding	299.793	-0.850077	0.157127	-5.41012	6.29816e-08	1.13126e-06	10360	NPM3
C20orf27|-|-|20p13|protein-coding	432.567	-1.15731	0.213964	-5.40892	6.34067e-08	1.13769e-06	54976	C20orf27
CDC42BPB|MRCKB|-|14q32.32|protein-coding	3731.39	0.587138	0.108557	5.40858	6.35264e-08	1.13862e-06	9578	CDC42BPB
LOC100506178|-|-|7p15.3|ncRNA	15.3227	4.33115	0.801537	5.40356	6.53326e-08	1.16872e-06	100506178	LOC100506178
CYYR1|C21orf95|-|21q21.3|protein-coding	68.6549	3.14457	0.581947	5.40353	6.53438e-08	1.16872e-06	116159	CYYR1
RAB34|NARR|RAB39|RAH|-|17q11.2|protein-coding	1461.38	-0.913021	0.169013	-5.40208	6.58714e-08	1.17691e-06	83871	RAB34
NOSTRIN|DaIP2|-|2q24.3|protein-coding	10.4749	2.74058	0.507378	5.40145	6.61038e-08	1.17857e-06	115677	NOSTRIN
FRY|13CDNA73|214K23.2|C13orf14|CG003|bA207N4.2|bA37E23.1|-|13q13.1|protein-coding	628.521	1.48398	0.274732	5.40155	6.60678e-08	1.17857e-06	10129	FRY
DRC1|C2orf39|CCDC164|CILD21|-|2p23.3|protein-coding	42.6928	6.21787	1.1521	5.39698	6.77735e-08	1.20707e-06	92749	DRC1
RAB4B-EGLN2|RERT-lncRNA|-|19q13.2|ncRNA	1177.79	0.530766	0.0983521	5.39659	6.79205e-08	1.20841e-06	100529264	RAB4B-EGLN2
LDLRAD3|LRAD3|-|11p13|protein-coding	774.162	0.729069	0.135103	5.3964	6.79925e-08	1.20842e-06	143458	LDLRAD3
LRG1|HMFT1766|LRG|-|19p13.3|protein-coding	8.22767	6.0353	1.11914	5.39279	6.93711e-08	1.23163e-06	116844	LRG1
UBE2E2|UBCH8|-|3p24.3|protein-coding	255.422	-0.726082	0.134823	-5.38546	7.22615e-08	1.2816e-06	7325	UBE2E2
RHOB|ARH6|ARHB|MST081|MSTP081|RHOH6|-|2p24.1|protein-coding	4245.1	1.99881	0.371183	5.38497	7.24583e-08	1.28374e-06	388	RHOB
TMEM181|GPR178|KIAA1423|-|6q25.3|protein-coding	1660.84	0.937215	0.174185	5.38057	7.42516e-08	1.31414e-06	57583	TMEM181
KSR1|KSR|RSU2|-|17q11.2|protein-coding	189.529	1.91356	0.355791	5.37833	7.51781e-08	1.32914e-06	8844	KSR1
TEAD4|EFTR-2|RTEF1|TCF13L1|TEF-3|TEF3|TEFR-1|hRTEF-1B|-|12p13.33|protein-coding	193.243	1.57114	0.292419	5.37293	7.74664e-08	1.36817e-06	7004	TEAD4
ZNF101|HZF12|-|19p13.11|protein-coding	80.701	0.89033	0.166005	5.36326	8.17325e-08	1.44201e-06	94039	ZNF101
TMEM132A|GBP|HSPA5BP1|-|11q12.2|protein-coding	454.005	2.41301	0.450456	5.35682	8.47e-08	1.4928e-06	54972	TMEM132A
CGNL1|JACOP|PCING|-|15q21.3|protein-coding	414.238	3.07755	0.574705	5.355	8.55565e-08	1.50633e-06	84952	CGNL1
MARK1|MARK|Par-1c|Par1c|-|1q41|protein-coding	16.3947	2.77321	0.518007	5.35361	8.62151e-08	1.51635e-06	4139	MARK1
IER2|ETR101|-|19p13.13|protein-coding	1618.13	1.56996	0.293292	5.35289	8.65606e-08	1.52084e-06	9592	IER2
ETS1|ETS-1|EWSR2|c-ets-1|p54|-|11q24.3|protein-coding	4047.37	1.33213	0.248887	5.35236	8.68127e-08	1.52368e-06	2113	ETS1
SPTBN2|GTRAP41|SCA5|SCAR14|-|11q13.2|protein-coding	40.9316	2.44256	0.456891	5.34605	8.98964e-08	1.57479e-06	6712	SPTBN2
CHKA|CHK|CK|CKI|EK|-|11q13.2|protein-coding	269.592	0.999486	0.186959	5.34602	8.99108e-08	1.57479e-06	1119	CHKA
GCH1|DYT14|DYT5|DYT5a|GCH|GTP-CH-1|GTPCH1|HPABH4B|-|14q22.2|protein-coding	68.2448	2.65156	0.496244	5.34326	9.12883e-08	1.59726e-06	2643	GCH1
ATP6AP1|16A|ATP6IP1|ATP6S1|Ac45|CF2|VATPS1|XAP-3|XAP3|-|Xq28|protein-coding	1698.1	0.538345	0.100786	5.34147	9.2194e-08	1.61144e-06	537	ATP6AP1
MRPL24|L24mt|MRP-L18|MRP-L24|-|1q23.1|protein-coding	672.969	-0.671776	0.12586	-5.33748	9.42481e-08	1.64564e-06	79590	MRPL24
ARRDC2|CLONE24945|PP2703|-|19p13.11|protein-coding	565.272	1.07575	0.20165	5.33473	9.56852e-08	1.66901e-06	27106	ARRDC2
SMOC1|OAS|-|14q24.2|protein-coding	216.784	3.48506	0.654266	5.32667	1.00027e-07	1.74295e-06	64093	SMOC1
BLOC1S1|BLOS1|BORCS1|GCN5L1|MICoA|RT14|-|12q13.2|protein-coding	510.485	-0.692908	0.130158	-5.32359	1.01741e-07	1.77098e-06	2647	BLOC1S1
GPR160|GPCR1|GPCR150|-|3q26.2|protein-coding	15.1127	3.88674	0.730156	5.32316	1.0198e-07	1.77332e-06	26996	GPR160
FXYD6-FXYD2|-|-|11q23.3|protein-coding	11.0342	5.9734	1.12231	5.32242	1.02396e-07	1.77677e-06	100533181	FXYD6-FXYD2
HS3ST1|3OST|3OST1|-|4p15.33|protein-coding	16.0847	6.5241	1.22582	5.32225	1.02494e-07	1.77677e-06	9957	HS3ST1
RASSF7|C11orf13|HRAS1|HRC1|-|11p15.5|protein-coding	59.0614	1.8389	0.345497	5.32247	1.02369e-07	1.77677e-06	8045	RASSF7
UBL3|HCG-1|PNSC1|-|13q12.3|protein-coding	1201.25	-0.701191	0.13176	-5.32172	1.02792e-07	1.78011e-06	5412	UBL3
TOP3B|TOP3B1|-|22q11.22|protein-coding	246.966	0.784269	0.147417	5.32008	1.03721e-07	1.79436e-06	8940	TOP3B
WASF2|IMD2|SCAR2|WASF4|WAVE2|dJ393P12.2|-|1p36.11|protein-coding	3284.55	0.779885	0.146677	5.31704	1.05471e-07	1.82276e-06	10163	WASF2
PLEKHM1|AP162|B2|OPTB6|-|17q21.31|protein-coding	580.954	0.948705	0.178465	5.31592	1.0612e-07	1.83211e-06	9842	PLEKHM1
DSG2|CDHF5|HDGC|-|18q12.1|protein-coding	11.3163	4.49432	0.845859	5.31332	1.07643e-07	1.85651e-06	1829	DSG2
RPL22L1|-|-|3q26.2|protein-coding	1324.74	-1.30528	0.24579	-5.31055	1.09295e-07	1.88309e-06	200916	RPL22L1
PGS1|-|-|17q25.3|protein-coding	409.002	0.860681	0.162142	5.30819	1.1072e-07	1.9057e-06	9489	PGS1
CRAMP1|CRAMP1L|HN1L|TCE4|-|16p13.3|protein-coding	776.099	0.737485	0.139002	5.30556	1.1233e-07	1.93144e-06	57585	CRAMP1
TTC28|TPRBK|-|22q12.1|protein-coding	931.465	0.899886	0.169708	5.30256	1.14188e-07	1.96138e-06	23331	TTC28
DLEU1|BCMS|BCMS1|DLB1|DLEU2|LEU1|LEU2|LINC00021|NCRNA00021|XTP6|-|13q14.2-q14.3|ncRNA	92.6212	-1.05971	0.19987	-5.30201	1.14532e-07	1.96531e-06	10301	DLEU1
C1orf123|-|-|1p32.3|protein-coding	575.092	-0.363804	0.0686508	-5.29934	1.16219e-07	1.99222e-06	54987	C1orf123
PPP1R26|KIAA0649|NRBE3|-|9q34.3|protein-coding	319.175	0.940508	0.177537	5.29752	1.17387e-07	2.0102e-06	9858	PPP1R26
PRR16|DSC54|LARGEN|-|5q23.1|protein-coding	465.027	-1.38007	0.260806	-5.29157	1.21274e-07	2.07466e-06	51334	PRR16
PCDH19|EFMR|EIEE9|-|Xq22.1|protein-coding	16.8033	2.42709	0.45885	5.28951	1.22645e-07	2.09601e-06	57526	PCDH19
LRRTM2|-|-|5q31.2|protein-coding	12.0555	2.11788	0.400611	5.28664	1.24585e-07	2.127e-06	26045	LRRTM2
VSIR|B7-H5|B7H5|C10orf54|DD1alpha|GI24|PD-1H|PP2135|SISP1|VISTA|-|10q22.1|protein-coding	620.208	2.01651	0.38149	5.28587	1.25106e-07	2.13375e-06	64115	VSIR
RHOBTB1|-|-|10q21.2|protein-coding	524.719	1.03352	0.195759	5.27955	1.29503e-07	2.20652e-06	9886	RHOBTB1
PHACTR2|C6orf56|-|6q24.2|protein-coding	905.517	0.947299	0.179441	5.27915	1.29784e-07	2.20908e-06	9749	PHACTR2
HEG1|HEG|MST112|MSTP112|-|3q21.2|protein-coding	2099.51	0.923648	0.174995	5.27813	1.30509e-07	2.21918e-06	57493	HEG1
CABLES1|CABL1|CABLES|HsT2563|IK3-1|-|18q11.2|protein-coding	329.819	1.68164	0.318662	5.27719	1.31183e-07	2.2284e-06	91768	CABLES1
LONRF3|RNF127|-|Xq24|protein-coding	20.3811	5.64167	1.07007	5.27224	1.3477e-07	2.28704e-06	79836	LONRF3
SNRPE|HYPT11|SME|Sm-E|snRNP-E|-|1q32.1|protein-coding	168.71	-0.89733	0.17057	-5.26077	1.43452e-07	2.43193e-06	6635	SNRPE
RP1L1|DCDC4B|-|8p23.1|protein-coding	8.59232	5.11946	0.973687	5.25781	1.45783e-07	2.46897e-06	94137	RP1L1
PRKX|PKX1|-|Xp22.33|protein-coding	272.464	1.33869	0.254628	5.25742	1.46093e-07	2.47174e-06	5613	PRKX
SYNPO|-|-|5q33.1|protein-coding	2554.56	1.6057	0.305619	5.25393	1.48888e-07	2.51651e-06	11346	SYNPO
MEOX2-AS1|-|-|7p21.2|ncRNA	7.70003	4.94136	0.942101	5.24505	1.56243e-07	2.63819e-06	101927524	MEOX2-AS1
GRK2|ADRBK1|BARK1|BETA-ARK1|-|11q13.2|protein-coding	1119.34	0.813181	0.155189	5.23995	1.60618e-07	2.70935e-06	156	GRK2
ROPN1L|ASP|RSPH11|-|5p15.2|protein-coding	8.49026	2.96025	0.564979	5.23957	1.60956e-07	2.71233e-06	83853	ROPN1L
SLC37A4|G6PT1|G6PT2|G6PT3|GSD1b|GSD1c|GSD1d|PRO0685|TRG-19|TRG19|-|11q23.3|protein-coding	151.436	0.633185	0.12092	5.23642	1.63725e-07	2.75625e-06	2542	SLC37A4
TMEM14B|-|-|6p24.2|protein-coding	296.044	-0.70737	0.135178	-5.23286	1.66903e-07	2.80697e-06	81853	TMEM14B
EDA|ECTD1|ED1|ED1-A1|ED1-A2|EDA-A1|EDA-A2|EDA1|EDA2|HED|HED1|ODT1|STHAGX1|TNLG7C|XHED|XLHED|-|Xq13.1|protein-coding	14.9835	2.81251	0.537724	5.2304	1.69147e-07	2.84187e-06	1896	EDA
COL4A2|ICH|POREN2|-|13q34|protein-coding	34007.4	1.37424	0.262813	5.22897	1.70453e-07	2.86097e-06	1284	COL4A2
ZIC1|CRS6|ZIC|ZNF201|-|3q24|protein-coding	232.169	-1.22321	0.233976	-5.22795	1.71403e-07	2.87406e-06	7545	ZIC1
FNDC5|FRCP2|irisin|-|1p35.1|protein-coding	130.53	5.88188	1.12602	5.2236	1.7548e-07	2.93951e-06	252995	FNDC5
KCNJ2-AS1|-|-|17q24.3|ncRNA	6.79328	4.3237	0.827929	5.22231	1.76707e-07	2.95712e-06	400617	KCNJ2-AS1
SVIL|-|-|10p11.23|protein-coding	1636.09	1.26427	0.242152	5.22096	1.78001e-07	2.97583e-06	6840	SVIL
CCNA1|CT146|-|13q13.3|protein-coding	6.88583	4.34959	0.833397	5.2191	1.7979e-07	2.99981e-06	8900	CCNA1
PCTP|PC-TP|STARD2|-|17q22|protein-coding	237.431	0.719058	0.137771	5.21921	1.79688e-07	2.99981e-06	58488	PCTP
FCN3|FCNH|HAKA1|-|1p36.11|protein-coding	7.41653	5.39014	1.0335	5.21539	1.83426e-07	3.05746e-06	8547	FCN3
ASXL1|BOPS|MDS|-|20q11.21|protein-coding	1851.52	0.6976	0.133799	5.2138	1.85011e-07	3.08085e-06	171023	ASXL1
RPL10A|CSA19|Csa-19|L10A|NEDD6|-|6p21.31|protein-coding	4017.98	-0.626507	0.120177	-5.21321	1.85599e-07	3.08759e-06	4736	RPL10A
LOXL1-AS1|-|-|15q24.1|ncRNA	133.004	-1.31751	0.252769	-5.21228	1.8653e-07	3.10003e-06	100287616	LOXL1-AS1
ADIRF|AFRO|APM2|C10orf116|apM-2|-|10q23.2|protein-coding	522.961	-1.29938	0.249313	-5.21185	1.8697e-07	3.10428e-06	10974	ADIRF
ANKRD36BP2|-|-|2p11.2|pseudo	12.8925	4.96848	0.953947	5.20834	1.9054e-07	3.16046e-06	645784	ANKRD36BP2
LIMS2|LGMD2W|PINCH-2|PINCH2|-|2q14.3|protein-coding	284.367	2.37338	0.455983	5.20496	1.94034e-07	3.21526e-06	55679	LIMS2
HDDC2|C6orf74|CGI-130|NS5ATP2|dJ167O5.2|-|6q22.31|protein-coding	339.016	-0.964768	0.185499	-5.20094	1.9828e-07	3.28239e-06	51020	HDDC2
CACFD1|C9orf7|D9S2135|FLOWER|-|9q34.2|protein-coding	103.849	0.951528	0.183014	5.19921	2.00136e-07	3.30989e-06	11094	CACFD1
ABHD6|-|-|3p14.3|protein-coding	143.738	1.1007	0.211735	5.19851	2.00894e-07	3.31916e-06	57406	ABHD6
SH3BP1|ARHGAP43|-|22q13.1|protein-coding	125.463	-0.940676	0.180978	-5.19774	2.01726e-07	3.32966e-06	23616	SH3BP1
KIAA0922|TMEM131L|-|4q31.3|protein-coding	310.943	1.0063	0.193623	5.19721	2.02306e-07	3.33597e-06	23240	KIAA0922
FBXW7|AGO|CDC4|FBW6|FBW7|FBX30|FBXO30|FBXW6|SEL-10|SEL10|hAgo|hCdc4|-|4q31.3|protein-coding	348.347	0.739047	0.142398	5.19003	2.10262e-07	3.46379e-06	55294	FBXW7
RARRES1|LXNL|PERG-1|TIG1|-|3q25.32|protein-coding	10.3346	4.62204	0.891245	5.18605	2.14802e-07	3.53514e-06	5918	RARRES1
SNHG6|HBII-276HG|NCRNA00058|U87HG|-|8q13.1|8q13|ncRNA	505.667	-0.80293	0.154873	-5.18444	2.16663e-07	3.56229e-06	641638	SNHG6
MAN2A2|MANA2X|-|15q26.1|protein-coding	823.108	0.809282	0.156204	5.18091	2.20802e-07	3.62682e-06	4122	MAN2A2
RINL|-|-|19q13.2|protein-coding	74.4965	1.36688	0.263854	5.18042	2.2139e-07	3.63295e-06	126432	RINL
ASRGL1|ALP|ALP1|CRASH|-|11q12.3|protein-coding	31.6698	5.00578	0.966673	5.17836	2.23846e-07	3.66969e-06	80150	ASRGL1
EMP3|YMP|-|19q13.33|protein-coding	2208.29	-1.32077	0.255173	-5.17599	2.26707e-07	3.71298e-06	2014	EMP3
DBNDD1|-|-|16q24.3|protein-coding	62.4748	2.01674	0.389662	5.1756	2.27179e-07	3.71712e-06	79007	DBNDD1
COBL|-|-|7p12.1|protein-coding	74.9585	7.53602	1.45673	5.17323	2.30082e-07	3.76098e-06	23242	COBL
RAB11FIP5|GAF1|RIP11|pp75|-|2p13.2|protein-coding	1931.74	0.607215	0.117461	5.16949	2.34735e-07	3.83333e-06	26056	RAB11FIP5
ABI3|NESH|SSH3BP3|-|17q21.32|protein-coding	109.71	4.15325	0.803621	5.16817	2.36403e-07	3.85683e-06	51225	ABI3
PRKAG1|AMPKG|-|12q13.12|protein-coding	983.447	-0.492609	0.0953249	-5.16768	2.37014e-07	3.85935e-06	5571	PRKAG1
ABCA7|ABCA-SSN|ABCX|AD9|-|19p13.3|protein-coding	150.763	1.80798	0.349857	5.16778	2.36887e-07	3.85935e-06	10347	ABCA7
SNX5|-|-|20p11.23|protein-coding	1001.25	-0.508871	0.0984916	-5.16664	2.3834e-07	3.87721e-06	27131	SNX5
CTNNBIP1|ICAT|-|1p36.22|protein-coding	598.496	1.08138	0.209503	5.16164	2.44802e-07	3.97851e-06	56998	CTNNBIP1
PSMG2|CLAST3|HCCA3|HsT1707|MDS003|PAC2|TNFSF5IP1|-|18p11.21|protein-coding	643.721	-0.467225	0.0906126	-5.15629	2.51894e-07	4.08984e-06	56984	PSMG2
LINC01451|HCCAT4|-|9q34.3|ncRNA	5.48768	4.94571	0.959461	5.15467	2.54074e-07	4.12126e-06	401561	LINC01451
ABCA9-AS1|-|-|17q24.2|ncRNA	3.81288	5.41695	1.05168	5.15074	2.59467e-07	4.20471e-06	104355297	ABCA9-AS1
KCNJ2|ATFB9|HHBIRK1|HHIRK1|IRK1|KIR2.1|LQT7|SQT3|-|17q24.3|protein-coding	61.5444	3.00449	0.583711	5.14723	2.64365e-07	4.27998e-06	3759	KCNJ2
TLE1|ESG|ESG1|GRG1|-|9q21.32|protein-coding	387.714	1.36701	0.265951	5.1401	2.74599e-07	4.44142e-06	7088	TLE1
JPH3|CAGL237|HDL2|JP-3|JP3|TNRC22|-|16q24.2|protein-coding	5.89607	6.04891	1.17736	5.13771	2.78108e-07	4.49387e-06	57338	JPH3
VAV3|-|-|1p13.3|protein-coding	147.513	2.85414	0.555598	5.13705	2.79086e-07	4.50535e-06	10451	VAV3
RPS13|S13|-|11p15.1|protein-coding	4143.32	-0.626334	0.121953	-5.13588	2.80826e-07	4.52912e-06	6207	RPS13
RNF144B|IBRDC2|PIR2|bA528A10.3|p53RFP|-|6p22.3|protein-coding	232.456	1.74987	0.340796	5.13465	2.8267e-07	4.55452e-06	255488	RNF144B
ZDHHC13|HIP14L|HIP3RP|-|11p15.1|protein-coding	235.536	1.24534	0.2427	5.13122	2.87877e-07	4.634e-06	54503	ZDHHC13
NTNG1|Lmnt1|-|1p13.3|protein-coding	276.139	-1.13838	0.221967	-5.12858	2.91928e-07	4.69474e-06	22854	NTNG1
SCAMP5|-|-|15q24.2|protein-coding	357.481	2.58576	0.504984	5.12049	3.0474e-07	4.89611e-06	192683	SCAMP5
SGSM2|RUTBC1|-|17p13.3|protein-coding	1109.55	0.706128	0.138115	5.11262	3.17723e-07	5.09986e-06	9905	SGSM2
TMEM9|DERM4|TMEM9A|-|1q32.1|protein-coding	547.002	-0.537745	0.105232	-5.11007	3.22036e-07	5.16419e-06	252839	TMEM9
UBE2D3|E2(17)KB3|UBC4/5|UBCH5C|-|4q24|protein-coding	2733.65	-0.389119	0.0761678	-5.10871	3.24365e-07	5.19661e-06	7323	UBE2D3
ZNF700|-|-|19p13.2|protein-coding	168.802	0.608702	0.119161	5.10825	3.25161e-07	5.20443e-06	90592	ZNF700
GOLT1B|CGI-141|GCT2|GOT1|GOT1B|YMR292W|-|12p12.1|protein-coding	791.747	-0.901097	0.176409	-5.10801	3.25574e-07	5.2061e-06	51026	GOLT1B
PPT2-EGFL8|-|-|6p21.32|ncRNA	319.041	0.934723	0.183163	5.10323	3.33905e-07	5.33428e-06	100532746	PPT2-EGFL8
DCTN4|DYN4|P62|-|5q33.1|protein-coding	1108.12	-0.374148	0.0733654	-5.0998	3.4002e-07	5.42684e-06	51164	DCTN4
ESD|FGH|-|13q14.2|protein-coding	1677.11	-0.6689	0.131201	-5.09829	3.42731e-07	5.46494e-06	2098	ESD
ZNRF1|NIN283|-|16q23.1|protein-coding	347.719	0.678755	0.13314	5.09807	3.4313e-07	5.46614e-06	84937	ZNRF1
MRPL42|HSPC204|L31MT|L42MT|MRP-L31|MRP-L42|MRP-S32|MRPL31|MRPS32|PTD007|RPML31|S32MT|-|12q22|protein-coding	477.121	-0.559799	0.109886	-5.09437	3.49895e-07	5.56866e-06	28977	MRPL42
SOX4|EVI16|-|6p22.3|protein-coding	829.095	2.5849	0.507581	5.09258	3.53227e-07	5.61641e-06	6659	SOX4
ZNF521|EHZF|Evi3|-|18q11.2|protein-coding	729.391	1.69798	0.333522	5.09106	3.56069e-07	5.65627e-06	25925	ZNF521
AP1B1|ADTB1|AP105A|BAM22|CLAPB2|-|22q12.2|protein-coding	1645.83	1.10154	0.216599	5.08563	3.6641e-07	5.81508e-06	162	AP1B1
HOXB9|HOX-2.5|HOX2|HOX2E|-|17q21.32|protein-coding	15.0565	4.29682	0.845096	5.08442	3.68758e-07	5.84685e-06	3219	HOXB9
RPS6KA3|CLS|HU-3|ISPK-1|MAPKAPK1B|MRX19|RSK|RSK2|S6K-alpha3|p90-RSK2|pp90RSK2|-|Xp22.12|protein-coding	1415.63	0.687431	0.135268	5.08199	3.73502e-07	5.91449e-06	6197	RPS6KA3
SLC23A2|NBTL1|SLC23A1|SVCT2|YSPL2|hSVCT2|-|20p13|protein-coding	630.63	0.8473	0.16673	5.08188	3.73723e-07	5.91449e-06	9962	SLC23A2
LOC101928304|-|-|6q23.2|ncRNA	5.62133	5.4862	1.08018	5.07898	3.79467e-07	5.99977e-06	101928304	LOC101928304
MTA2|MTA1L1|PID|-|11q12.3|protein-coding	1456.51	0.661299	0.130263	5.07665	3.84157e-07	6.06824e-06	9219	MTA2
ABHD17B|C9orf77|CGI-67|FAM108B1|-|9q21.13|protein-coding	221.309	0.941075	0.185472	5.07396	3.89628e-07	6.14892e-06	51104	ABHD17B
C11orf68|BLES03|P5326|-|11q13.1|protein-coding	861.411	-0.574732	0.113277	-5.0737	3.90154e-07	6.15147e-06	83638	C11orf68
RIT1|NS8|RIBB|RIT|ROC1|-|1q22|protein-coding	535.958	0.766059	0.150996	5.07339	3.90801e-07	6.15593e-06	6016	RIT1
ALS2|ALS2CR6|ALSJ|IAHSP|PLSJ|-|2q33.1|protein-coding	699.638	0.556202	0.109662	5.07198	3.9369e-07	6.19566e-06	57679	ALS2
S1PR4|EDG6|LPC1|S1P4|SLP4|-|19p13.3|protein-coding	5.88205	6.05083	1.19351	5.06977	3.98296e-07	6.26232e-06	8698	S1PR4
CD82|4F9|C33|GR15|IA4|KAI1|R2|SAR2|ST6|TSPAN27|-|11p11.2|protein-coding	987.343	0.879377	0.17347	5.06935	3.99184e-07	6.27045e-06	3732	CD82
RNF123|FP1477|KPC1|-|3p21.31|protein-coding	545.392	0.460052	0.0907577	5.06901	3.9989e-07	6.27572e-06	63891	RNF123
BAG5|BAG-5|-|14q32.33|protein-coding	738.076	0.3863	0.0762139	5.06862	4.007e-07	6.2826e-06	9529	BAG5
IPO11|RanBP11|-|5q12.1|protein-coding	533.315	0.904657	0.178535	5.06713	4.03868e-07	6.32053e-06	51194	IPO11
IFI27L2|FAM14A|ISG12B|TLH29|-|14q32.12|protein-coding	409.632	-1.1251	0.222037	-5.06715	4.03819e-07	6.32053e-06	83982	IFI27L2
RSL1D1|CSIG|L12|PBK1|UTP30|-|16p13.13|protein-coding	2273.9	-0.568051	0.112122	-5.06638	4.05462e-07	6.33962e-06	26156	RSL1D1
SSPO|-|-|7q36.1|protein-coding	9.70114	2.92745	0.577881	5.06584	4.0661e-07	6.35169e-06	23145	SSPO
RNF19A|RNF19|-|8q22.2|protein-coding	1101.45	0.963986	0.190465	5.06122	4.1659e-07	6.50158e-06	25897	RNF19A
PIR-FIGF|-|-|Xp22.2|ncRNA	95.8211	2.01814	0.398788	5.06068	4.17764e-07	6.50788e-06	100532742	PIR-FIGF
B4GALT6|B4Gal-T6|beta4Gal-T6|-|18q12.1|protein-coding	30.1824	2.71784	0.537033	5.06085	4.17401e-07	6.50788e-06	9331	B4GALT6
HLA-F|CDA12|HLA-5.4|HLA-CDA12|HLAF|-|6p22.1|protein-coding	182.013	2.44735	0.483824	5.05834	4.2292e-07	6.58212e-06	3134	HLA-F
GIT2|CAT-2|CAT2|PKL|-|12q24.11|protein-coding	1228.6	0.702804	0.139243	5.04732	4.4806e-07	6.96698e-06	9815	GIT2
TECPR2|KIAA0329|SPG49|-|14q32.31|protein-coding	818.412	0.533438	0.105694	5.04702	4.48761e-07	6.97146e-06	9895	TECPR2
SOS1|GF1|GGF1|GINGF|HGF|NS4|-|2p22.1|protein-coding	947.802	0.343419	0.0680504	5.04654	4.4989e-07	6.9826e-06	6654	SOS1
STAU2|39K2|39K3|-|8q21.11|protein-coding	281.699	0.852657	0.169105	5.04217	4.60271e-07	7.13716e-06	27067	STAU2
CUL9|H7AP1|PARC|-|6p21.1|protein-coding	592.971	0.747721	0.148351	5.04022	4.65001e-07	7.20389e-06	23113	CUL9
GAMT|CCDS2|HEL-S-20|PIG2|TP53I2|-|19p13.3|protein-coding	182.757	-1.17373	0.232958	-5.03837	4.69522e-07	7.26727e-06	2593	GAMT
FOXL1|FKH6|FKHL11|FREAC7|-|16q24.1|protein-coding	263.589	-1.02639	0.20382	-5.03576	4.75952e-07	7.33991e-06	2300	FOXL1
PFDN6|H2-KE2|HKE2|KE-2|PFD6|-|6p21.32|protein-coding	314.336	-0.741622	0.14727	-5.0358	4.75851e-07	7.33991e-06	10471	PFDN6
GAB3|-|-|Xq28|protein-coding	103.741	1.55956	0.309682	5.03601	4.75345e-07	7.33991e-06	139716	GAB3
SYT17|sytXVII|-|16p12.3|protein-coding	48.2319	2.66872	0.529909	5.0362	4.74869e-07	7.33991e-06	51760	SYT17
C2CD2L|DLNB23|TMEM24|-|11q23.3|protein-coding	208.741	0.724762	0.14398	5.03375	4.80965e-07	7.41045e-06	9854	C2CD2L
EPHB4|HTK|MYK1|TYRO11|-|7q22.1|protein-coding	1515.96	1.56304	0.310524	5.03355	4.81478e-07	7.4116e-06	2050	EPHB4
HIPK1|Myak|Nbak2|-|1p13.2|protein-coding	1091.87	0.592961	0.117844	5.03174	4.86042e-07	7.47506e-06	204851	HIPK1
CTGF|CCN2|HCS24|IGFBP8|NOV2|-|6q23.2|protein-coding	9021.2	1.53035	0.304441	5.02677	4.98815e-07	7.66452e-06	1490	CTGF
FBXL7|FBL6|FBL7|-|5p15.1|protein-coding	808.164	0.952569	0.189515	5.02635	4.99893e-07	7.67411e-06	23194	FBXL7
GGA2|VEAR|-|16p12.2|protein-coding	829.536	0.556113	0.110649	5.02591	5.01052e-07	7.68048e-06	23062	GGA2
METTL21A|FAM119A|HCA557b|HSPA-KMT|-|2q33.3|protein-coding	80.1791	0.990123	0.197006	5.02585	5.01217e-07	7.68048e-06	151194	METTL21A
CTDNEP1|DULLARD|HSA011916|NET56|-|17p13.1|protein-coding	1348.93	-0.415437	0.0826879	-5.02415	5.05655e-07	7.74147e-06	23399	CTDNEP1
PCGF3|DONG1|RNF3|RNF3A|-|4p16.3|protein-coding	1027.49	0.670277	0.133474	5.02177	5.11966e-07	7.831e-06	10336	PCGF3
PDE8A|HsT19550|-|15q25.3|protein-coding	711.685	0.857243	0.170724	5.02122	5.13443e-07	7.84649e-06	5151	PDE8A
LRP11|MANSC3|bA350J20.3|-|6q25.1|protein-coding	1039.52	-0.814404	0.162271	-5.0188	5.19944e-07	7.93866e-06	84918	LRP11
ST6GALNAC4|IV|SIAT3-C|SIAT3C|SIAT7-D|SIAT7D|ST6GALNACIV|ST6GalNAc|-|9q34.11|protein-coding	356.718	0.553462	0.110289	5.01829	5.21334e-07	7.9527e-06	27090	ST6GALNAC4
LHPP|HDHD2B|-|10q26.13|protein-coding	150.75	-1.02488	0.204238	-5.01808	5.21913e-07	7.95436e-06	64077	LHPP
ZNF71|EZFIT|-|19q13.43|protein-coding	201.243	1.07412	0.21416	5.01548	5.29005e-07	8.05517e-06	58491	ZNF71
VPS37B|-|-|12q24.31|protein-coding	1041.85	0.436956	0.0871305	5.01496	5.30433e-07	8.06965e-06	79720	VPS37B
MAP2K2|CFC4|MAPKK2|MEK2|MKK2|PRKMK2|-|19p13.3|protein-coding	1291.65	-0.35414	0.0706423	-5.01315	5.35467e-07	8.1389e-06	5605	MAP2K2
ATP5D|-|-|19p13.3|protein-coding	851.292	-0.523968	0.104553	-5.01152	5.40017e-07	8.20068e-06	513	ATP5D
MON1B|HSRG1|SAND2|SRG1|-|16q23.1|protein-coding	476.757	0.568269	0.113416	5.0105	5.42894e-07	8.23698e-06	22879	MON1B
FIGNL2|-|-|12q13.13|protein-coding	14.8801	2.10467	0.420264	5.00798	5.50056e-07	8.33816e-06	401720	FIGNL2
NOS1AP|6330408P19Rik|CAPON|-|1q23.3|protein-coding	7.07748	4.82146	0.962807	5.00772	5.50796e-07	8.34189e-06	9722	NOS1AP
AMN1|-|-|12p11.21|protein-coding	92.2021	1.24098	0.247969	5.00457	5.59879e-07	8.47187e-06	196394	AMN1
SNCAIP|SYPH1|Sph1|-|5q23.2|protein-coding	107.06	2.47613	0.494806	5.00425	5.60801e-07	8.47822e-06	9627	SNCAIP
KLHL14|-|-|18q12.1|protein-coding	5.42545	5.93362	1.18706	4.99858	5.77554e-07	8.71939e-06	57565	KLHL14
MAVS|CARDIF|IPS-1|IPS1|VISA|-|20p13|protein-coding	2289.1	0.495239	0.0990776	4.9985	5.77785e-07	8.71939e-06	57506	MAVS
C11orf80|TOP6BL|TOPOVIBL|-|11q13.2|protein-coding	133.264	1.12329	0.224801	4.99682	5.82838e-07	8.78781e-06	79703	C11orf80
PEMT|PEAMT|PEMPT|PEMT2|PLMT|PNMT|-|17p11.2|protein-coding	248.082	-0.702562	0.14073	-4.99227	5.96753e-07	8.98959e-06	10400	PEMT
HERC2P9|-|-|15q13.1|pseudo	57.3613	1.11345	0.223071	4.99147	5.99217e-07	9.01064e-06	440248	HERC2P9
ACVRL1|ACVRLK1|ALK-1|ALK1|HHT|HHT2|ORW2|SKR3|TSR-I|-|12q13.13|protein-coding	3353.73	1.02959	0.206264	4.9916	5.98823e-07	9.01064e-06	94	ACVRL1
NUDCD3|NudCL|-|7p13|protein-coding	1635.33	0.438902	0.0879747	4.98895	6.07068e-07	9.12059e-06	23386	NUDCD3
HMGA1|HMG-R|HMGA1A|HMGIY|-|6p21.31|protein-coding	7989.17	-1.72039	0.344926	-4.98771	6.10996e-07	9.17145e-06	3159	HMGA1
GRIPAP1|GRASP-1|-|Xp11.23|protein-coding	597.371	0.739644	0.148357	4.98558	6.17749e-07	9.26459e-06	56850	GRIPAP1
TMED2|P24A|RNP24|p24|p24b1|p24beta1|-|12q24.31|protein-coding	3776.65	-0.427112	0.0857211	-4.98257	6.27443e-07	9.40163e-06	10959	TMED2
TIPARP|ARTD14|PARP7|pART14|-|3q25.31|protein-coding	989.884	-0.576479	0.115715	-4.98189	6.29673e-07	9.42669e-06	25976	TIPARP
GMFB|GMF|-|14q22.2|protein-coding	967.873	-0.811215	0.16286	-4.98104	6.32426e-07	9.45116e-06	2764	GMFB
NOV|CCN3|IBP-9|IGFBP-9|IGFBP9|NOVh|-|8q24.12|protein-coding	116.546	3.87742	0.778424	4.98112	6.32175e-07	9.45116e-06	4856	NOV
ULK3|-|-|15q24.1|protein-coding	572.996	0.665684	0.133684	4.97953	6.37391e-07	9.51694e-06	25989	ULK3
SPAG16|PF20|WDR29|-|2q34|protein-coding	139.534	-0.676547	0.135928	-4.97724	6.44973e-07	9.62165e-06	79582	SPAG16
KIAA1161|NET37|-|9p13.3|protein-coding	74.1535	1.08111	0.217219	4.97706	6.45567e-07	9.62203e-06	57462	KIAA1161
CCDC85A|-|-|2p16.1|protein-coding	84.591	1.96549	0.395072	4.97502	6.524e-07	9.71531e-06	114800	CCDC85A
ST8SIA6|SIA8F|SIAT8-F|SIAT8F|ST8SIA-VI|ST8SiaVI|-|10p12.33|protein-coding	18.7952	4.63925	0.932759	4.97368	6.5692e-07	9.774e-06	338596	ST8SIA6
DLL1|DELTA1|DL1|Delta|-|6q27|protein-coding	64.8066	1.70025	0.341867	4.97342	6.57824e-07	9.77885e-06	28514	DLL1
LRRC58|-|-|3q13.33|protein-coding	708.866	-0.674048	0.13557	-4.97195	6.62817e-07	9.84441e-06	116064	LRRC58
TTC39C|C18orf17|HsT2697|-|18q11.2|protein-coding	261.146	-0.830756	0.167117	-4.9711	6.65746e-07	9.87923e-06	125488	TTC39C
TJP1|ZO-1|-|15q13.1|protein-coding	2294.58	1.07333	0.215953	4.97021	6.68806e-07	9.91593e-06	7082	TJP1
RGS10|-|-|10q26.11|protein-coding	521.33	-0.89785	0.180715	-4.96833	6.75326e-07	9.99506e-06	6001	RGS10
RPLP0|L10E|LP0|P0|PRLP0|RPP0|-|12q24.23|protein-coding	10333.3	-0.610956	0.122967	-4.96844	6.74936e-07	9.99506e-06	6175	RPLP0
EPHA5|CEK7|EHK-1|EHK1|EK7|HEK7|TYRO4|-|4q13.1-q13.2|protein-coding	6.08953	5.6007	1.12748	4.96744	6.78429e-07	1.00322e-05	2044	EPHA5
GREB1L|C18orf6|KIAA1772|-|18q11.1-q11.2|protein-coding	60.6046	2.87731	0.57939	4.96611	6.83098e-07	1.00924e-05	80000	GREB1L
ACP1|HAAP|LMW-PTP|LMWPTP|-|2p25.3|protein-coding	797.42	-0.414192	0.0834363	-4.96416	6.89981e-07	1.01852e-05	52	ACP1
MRPL21|L21mt|MRP-L21|-|11q13.3|protein-coding	265.144	-0.571382	0.115135	-4.96273	6.95092e-07	1.02517e-05	219927	MRPL21
RPL27|L27|-|17q21.31|protein-coding	8327.69	-0.689501	0.138969	-4.96156	6.99297e-07	1.03047e-05	6155	RPL27
SLC5A4|DJ90G24.4|SAAT1|SGLT3|-|22q12.3|protein-coding	9.65664	4.52012	0.911092	4.96121	7.00539e-07	1.0314e-05	6527	SLC5A4
TBCA|-|-|5q14.1|protein-coding	532.788	-0.573298	0.115599	-4.95936	7.07251e-07	1.03857e-05	6902	TBCA
ETFRF1|LYRM5|-|12p12.1|protein-coding	130.806	-0.852196	0.171832	-4.95948	7.06824e-07	1.03857e-05	144363	ETFRF1
UTRN|DMDL|DRP|DRP1|-|6q24.2|protein-coding	3760.95	1.42379	0.287074	4.95965	7.06202e-07	1.03857e-05	7402	UTRN
NPTN-IT1|lncRNA-LET|-|15q24.1|ncRNA	80.6576	0.786414	0.158578	4.95915	7.08015e-07	1.03879e-05	101241892	NPTN-IT1
EML3|ELP95|-|11q12.3|protein-coding	1283.72	0.681074	0.137422	4.95606	7.19371e-07	1.05454e-05	256364	EML3
CLEC4F|CLECSF13|KCLR|-|2p13.3|protein-coding	3.44105	5.27099	1.0638	4.95486	7.23836e-07	1.06016e-05	165530	CLEC4F
SNCG|BCSG1|SR|-|10q23.2|protein-coding	150.843	2.36269	0.477208	4.95108	7.38029e-07	1.08001e-05	6623	SNCG
AK7|AK 7|-|14q32.2|protein-coding	9.87967	3.49043	0.705089	4.95033	7.40859e-07	1.08322e-05	122481	AK7
RPS18|D6S218E|HKE3|KE-3|KE3|S18|-|6p21.32|protein-coding	10657.5	-0.888876	0.1797	-4.94644	7.55839e-07	1.10417e-05	6222	RPS18
IGHMBP2|CATF1|CMT2S|HCSA|HMN6|SMARD1|SMUBP2|ZFAND7|-|11q13.3|protein-coding	240.794	0.729055	0.147508	4.94249	7.71302e-07	1.12578e-05	3508	IGHMBP2
PIK3C2A|CPK|PI3-K-C2(ALPHA)|PI3-K-C2A|PI3K-C2-alpha|PI3K-C2alpha|-|11p15.1|protein-coding	883.767	0.59008	0.119396	4.94222	7.72366e-07	1.12636e-05	5286	PIK3C2A
KCNQ3|BFNC2|EBN2|KV7.3|-|8q24.22|protein-coding	220.797	3.81797	0.772781	4.94056	7.78993e-07	1.13505e-05	3786	KCNQ3
FZD7|FzE3|-|2q33.1|protein-coding	431.969	-0.91547	0.185314	-4.9401	7.8081e-07	1.13671e-05	8324	FZD7
FAM171A2|-|-|17q21.31|protein-coding	145.401	1.1674	0.236545	4.93522	8.00613e-07	1.16454e-05	284069	FAM171A2
PHACTR1|RPEL|RPEL1|dJ257A7.2|-|6p24.1|protein-coding	72.6753	1.65303	0.334974	4.9348	8.02319e-07	1.16602e-05	221692	PHACTR1
BTF3|BETA-NAC|BTF3a|BTF3b|NACB|-|5q13.2|protein-coding	3732.79	-0.426998	0.0865657	-4.93264	8.11248e-07	1.17798e-05	689	BTF3
COL27A1|STLS|-|9q32|protein-coding	914.236	0.81061	0.164445	4.92936	8.24996e-07	1.19692e-05	85301	COL27A1
C19orf33|H2RSP|IMUP|IMUP-1|IMUP-2|-|19q13.2|protein-coding	22.5165	6.11742	1.24106	4.92918	8.25763e-07	1.197e-05	64073	C19orf33
PRRG1|PRGP1|-|Xp21.1|protein-coding	455.572	0.847829	0.172053	4.92772	8.31948e-07	1.20493e-05	5638	PRRG1
SYT11|SYT12|sytXI|-|1q22|protein-coding	842.984	1.2422	0.252118	4.92707	8.34726e-07	1.20792e-05	23208	SYT11
STAG3L5P|-|-|7q22.1|pseudo	29.7215	1.37302	0.278708	4.92636	8.37742e-07	1.21125e-05	101735302	STAG3L5P
PRKCQ-AS1|-|-|10p15.1|ncRNA	9.06113	5.19528	1.0549	4.92492	8.43961e-07	1.2192e-05	439949	PRKCQ-AS1
NSA2|CDK105|HCL-G1|HCLG1|HUSSY-29|HUSSY29|TINP1|-|5q13.3|protein-coding	745.993	-0.578456	0.117504	-4.92286	8.52893e-07	1.23105e-05	10412	NSA2
ATG12|APG12|APG12L|FBR93|HAPG12|-|5q22.3|protein-coding	856.972	-0.465312	0.0945488	-4.9214	8.59273e-07	1.2392e-05	9140	ATG12
LOC151174|-|-|2q37.3|ncRNA	6.45519	5.18238	1.0538	4.91782	8.75153e-07	1.26103e-05	151174	LOC151174
DAZAP2|PRTB|-|12q13.13|protein-coding	1969.47	0.542856	0.110422	4.91621	8.82343e-07	1.2703e-05	9802	DAZAP2
PURG|PURG-A|PURG-B|-|8p12|protein-coding	10.5132	3.58073	0.728532	4.91499	8.8786e-07	1.27716e-05	29942	PURG
USF1|FCHL|FCHL1|HYPLIP1|MLTF|MLTFI|UEF|bHLHb11|-|1q23.3|protein-coding	413.914	0.618509	0.125955	4.91055	9.08216e-07	1.30533e-05	7391	USF1
ZASP|-|-|7q22.1|protein-coding	61.8917	1.20685	0.245905	4.90779	9.21086e-07	1.3227e-05	101927655	ZASP
EIF3I|EIF3S2|PRO2242|TRIP-1|TRIP1|eIF3-beta|eIF3-p36|-|1p35.2|protein-coding	2034.67	-0.612622	0.124887	-4.90541	9.32335e-07	1.33772e-05	8668	EIF3I
NAALADL1|I100|NAALADASEL|-|11q13.1|protein-coding	75.108	-1.11347	0.227018	-4.90476	9.35395e-07	1.34097e-05	10004	NAALADL1
TSPEAR|C21orf29|DFNB98|TSP-EAR|-|21q22.3|protein-coding	6.29429	6.14664	1.25408	4.90133	9.51915e-07	1.3635e-05	54084	TSPEAR
RPS15A|S15a|-|16p12.3|protein-coding	4111.63	-0.592796	0.121084	-4.89574	9.79346e-07	1.4016e-05	6210	RPS15A
FXYD2|ATP1G1|HOMG2|-|11q23.3|protein-coding	9.89669	6.79956	1.389	4.8953	9.81543e-07	1.40356e-05	486	FXYD2
GSDMD|DF5L|DFNA5L|FKSG10|GSDMDC1|-|8q24.3|protein-coding	504.089	1.19535	0.24452	4.88855	1.01583e-06	1.45135e-05	79792	GSDMD
SNRNP27|27K|RY1|-|2p13.3|protein-coding	333.626	-0.536697	0.109794	-4.88821	1.01759e-06	1.45264e-05	11017	SNRNP27
SF3B5|SF3b10|Ysf3|-|6q24.2|protein-coding	795.251	-0.540518	0.110639	-4.88543	1.03204e-06	1.47203e-05	83443	SF3B5
NUDT1|MTH1|-|7p22.3|protein-coding	176.012	-1.31078	0.268336	-4.88485	1.03508e-06	1.47512e-05	4521	NUDT1
MPDZ|HYC2|MUPP1|-|9p23|protein-coding	1286.97	1.23829	0.253585	4.88314	1.04411e-06	1.48673e-05	8777	MPDZ
NHSL1|C6orf63|-|6q24.1|protein-coding	380.323	1.86369	0.382283	4.87516	1.08721e-06	1.5468e-05	57224	NHSL1
NUDT4|DIPP2|DIPP2alpha|DIPP2beta|HDCMB47P|-|12q22|protein-coding	437.077	1.15114	0.236243	4.87271	1.10079e-06	1.56481e-05	11163	NUDT4
BCOR|ANOP2|MAA2|MCOPS2|-|Xp11.4|protein-coding	471.631	1.00815	0.207053	4.86905	1.12133e-06	1.59267e-05	54880	BCOR
PIGQ|GPI1|c407A10.1|-|16p13.3|protein-coding	524.897	0.695155	0.142968	4.8623	1.16028e-06	1.6466e-05	9091	PIGQ
SEMA6C|SEMAY|m-SemaY|m-SemaY2|-|1q21.3|protein-coding	208.614	1.471	0.302556	4.8619	1.16262e-06	1.64854e-05	10500	SEMA6C
TET3|hCG_40738|-|2p13.1|protein-coding	311.695	1.38777	0.285477	4.86125	1.1665e-06	1.65265e-05	200424	TET3
GALNT1|GALNAC-T1|-|18q12.2|protein-coding	1442.33	1.19167	0.245226	4.85949	1.17689e-06	1.66598e-05	2589	GALNT1
TMEM254|C10orf57|bA369J21.6|-|10q22.3|protein-coding	320.295	-0.563161	0.11597	-4.85608	1.19734e-06	1.69302e-05	80195	TMEM254
PRICKLE4|C6orf49|OBTP|OEBT|TOMM6|-|6p21.1|protein-coding	149.049	2.07922	0.428178	4.85597	1.198e-06	1.69302e-05	29964	PRICKLE4
CNIH1|CNIH|CNIH-1|CNIL|TGAM77|-|14q22.2|protein-coding	1043.23	-0.524106	0.107957	-4.85475	1.20538e-06	1.70203e-05	10175	CNIH1
PMM1|Sec53|-|22q13.2|protein-coding	556.621	-1.04616	0.215537	-4.85374	1.21154e-06	1.7093e-05	5372	PMM1
ZNF704|Gig1|-|8q21.13|protein-coding	38.4977	2.8466	0.586503	4.85352	1.21289e-06	1.70978e-05	619279	ZNF704
C15orf62|-|-|15q15.1|protein-coding	16.6447	4.15003	0.855658	4.8501	1.234e-06	1.73725e-05	643338	C15orf62
SPCS1|HSPC033|SPC1|SPC12|YJR010C-A|-|3p21.1|protein-coding	968.678	-0.57527	0.118612	-4.85003	1.23444e-06	1.73725e-05	28972	SPCS1
ATAD2B|-|-|2p24.1-p23.3|protein-coding	199.412	0.739361	0.152475	4.84905	1.24052e-06	1.74292e-05	54454	ATAD2B
RPS8|S8|-|1p34.1|protein-coding	12879	-0.628903	0.129693	-4.84919	1.2397e-06	1.74292e-05	6202	RPS8
PPP4R1L|C20orf192|PPP4R1P1|PRO1085|-|20q13.32|pseudo	103.892	0.878642	0.181358	4.8448	1.26738e-06	1.77835e-05	55370	PPP4R1L
ZNF235|ANF270|HZF6|ZFP93|ZNF270|-|19q13.31|protein-coding	42.7596	1.1109	0.229308	4.84458	1.26882e-06	1.77835e-05	9310	ZNF235
LINC01704|-|-|1q23.1|ncRNA	3.923	5.4583	1.12668	4.84456	1.2689e-06	1.77835e-05	646268	LINC01704
LBR|DHCR14B|LMN2R|PHA|TDRD18|-|1q42.12|protein-coding	692.055	1.44189	0.297692	4.84355	1.27541e-06	1.78599e-05	3930	LBR
SGTB|SGT2|-|5q12.3|protein-coding	474.942	-0.707716	0.146153	-4.8423	1.28344e-06	1.79575e-05	54557	SGTB
MARC2|MOSC2|-|1q41|protein-coding	139.37	1.17911	0.243521	4.84193	1.28583e-06	1.79612e-05	54996	2019-03-02
KBTBD11|KLHDC7C|-|8p23.3|protein-coding	788.523	1.70602	0.352336	4.84202	1.28528e-06	1.79612e-05	9920	KBTBD11
CLEC16A|Gop-1|KIAA0350|-|16p13.13|protein-coding	468.439	0.516586	0.106696	4.84165	1.28767e-06	1.79721e-05	23274	CLEC16A
RPS9|S9|-|19q13.42|protein-coding	5395.7	-0.544675	0.112516	-4.84086	1.2928e-06	1.80288e-05	6203	RPS9
ZNF593|ZT86|-|1p36.11|protein-coding	164.281	-0.754234	0.155823	-4.84032	1.2963e-06	1.80626e-05	51042	ZNF593
RNF44|-|-|5q35.2|protein-coding	505.607	1.17173	0.242089	4.84007	1.29791e-06	1.80703e-05	22838	RNF44
MIF4GD|AD023|MIFD|SLIP1|-|17q25.1|protein-coding	146.179	1.12443	0.232586	4.83447	1.33499e-06	1.85712e-05	57409	MIF4GD
NIT2|HEL-S-8a|-|3q12.2|protein-coding	383.317	-0.596416	0.123388	-4.83367	1.3404e-06	1.86311e-05	56954	NIT2
MIR600HG|C9orf45|GL012|NCRNA00287|-|9q33.3|ncRNA	16.1884	1.86588	0.386065	4.83306	1.34452e-06	1.86731e-05	81571	MIR600HG
TFEB|ALPHATFEB|BHLHE35|TCFEB|-|6p21.1|protein-coding	121.908	0.793888	0.164376	4.82969	1.36745e-06	1.89759e-05	7942	TFEB
C7orf73|PL-5283|-|7q33|protein-coding	609.388	-1.00882	0.208903	-4.82916	1.37111e-06	1.90111e-05	647087	C7orf73
IMPDH2|IMPD2|IMPDH-II|-|3p21.31|protein-coding	3353.17	-0.554673	0.114888	-4.82796	1.37938e-06	1.91101e-05	3615	IMPDH2
GLIS1|-|-|1p32.3|protein-coding	104.656	-0.914761	0.189765	-4.82049	1.43206e-06	1.98237e-05	148979	GLIS1
LINC00926|-|-|15q21.3|ncRNA	34.555	1.26597	0.262658	4.81986	1.4366e-06	1.98702e-05	283663	LINC00926
TRAF5|MGC:39780|RNF84|-|1q32.3|protein-coding	410.688	0.817759	0.169693	4.81905	1.44244e-06	1.99346e-05	7188	TRAF5
CCL21|6Ckine|CKb9|ECL|SCYA21|SLC|TCA4|-|9p13.3|protein-coding	23.5513	7.07648	1.46881	4.81784	1.45122e-06	2.00396e-05	6366	CCL21
RWDD1|CGI-24|PTD013|-|6q22.1|protein-coding	710.284	-0.629519	0.130674	-4.81746	1.45398e-06	2.00614e-05	51389	RWDD1
GJC2|CX46.6|Cx47|GJA12|HLD2|LMPH1C|PMLDAR|SPG44|-|1q42.13|protein-coding	48.2262	1.86681	0.387854	4.81317	1.48556e-06	2.04804e-05	57165	GJC2
SSFA2|CS-1|CS1|KRAP|SPAG13|-|2q31.3|protein-coding	1961.2	0.946488	0.196664	4.81272	1.48888e-06	2.05094e-05	6744	SSFA2
SRD5A1|S5AR 1|-|5p15.31|protein-coding	220.672	-0.756241	0.157156	-4.81205	1.49391e-06	2.05601e-05	6715	SRD5A1
RPL12|L12|-|9q33.3|protein-coding	5972.5	-0.881959	0.183287	-4.8119	1.49499e-06	2.05601e-05	6136	RPL12
ATIC|AICAR|AICARFT|HEL-S-70p|IMPCHASE|PURH|-|2q35|protein-coding	1138.65	-0.739239	0.153673	-4.81048	1.50566e-06	2.069e-05	471	ATIC
GKAP1|FKSG21|GKAP42|-|9q21.32|protein-coding	9.77357	2.16786	0.450843	4.80847	1.52089e-06	2.08823e-05	80318	GKAP1
HLA-J|CDA12|D6S203|HLA-59|HLA-CDA12|-|6p22.1|pseudo	56.437	1.59436	0.331614	4.80787	1.52547e-06	2.09282e-05	3137	HLA-J
PELI1|-|-|2p14|protein-coding	302.187	1.87576	0.390477	4.80377	1.55707e-06	2.13443e-05	57162	PELI1
CMTM7|CKLFSF7|-|3p22.3|protein-coding	268.839	1.42285	0.29628	4.80239	1.56784e-06	2.14745e-05	112616	CMTM7
TSPAN7|A15|CCG-B7|CD231|DXS1692E|MRX58|MXS1|TALLA-1|TM4SF2|TM4SF2b|-|Xp11.4|protein-coding	5.65063	4.98929	1.03978	4.79841	1.59927e-06	2.18873e-05	7102	TSPAN7
RBMS2|SCR3|-|12q13.3|protein-coding	1343.58	1.04866	0.218562	4.798	1.6026e-06	2.19152e-05	5939	RBMS2
TAZ|BTHS|CMD3A|EFE|EFE2|G4.5|LVNCX|Taz1|-|Xq28|protein-coding	415.086	0.744099	0.155152	4.79595	1.61908e-06	2.21227e-05	6901	TAZ
EYA1|BOP|BOR|BOS1|OFC1|-|8q13.3|protein-coding	11.461	2.79705	0.583733	4.79166	1.65407e-06	2.25643e-05	2138	EYA1
DCAF7|AN11|HAN11|SWAN-1|WDR68|-|17q23.3|protein-coding	1426.84	0.805025	0.168005	4.79168	1.65392e-06	2.25643e-05	10238	DCAF7
SDHD|CBT1|CII-4|CWS3|PGL|PGL1|QPs3|SDH4|cybS|-|11q23.1|protein-coding	414.966	-0.740217	0.154502	-4.791	1.65951e-06	2.26202e-05	6392	SDHD
ZNF32|KOX30|-|10q11.21|protein-coding	286.284	-0.526407	0.109902	-4.78978	1.66966e-06	2.27402e-05	7580	ZNF32
TBC1D13|-|-|9q34.11|protein-coding	634.204	0.681097	0.142368	4.78407	1.71781e-06	2.33771e-05	54662	TBC1D13
HOXD4|HHO.C13|HOX-5.1|HOX4|HOX4B|Hox-4.2|-|2q31.1|protein-coding	152.487	0.956611	0.200027	4.7824	1.73211e-06	2.35528e-05	3233	HOXD4
TINF2|DKCA3|TIN2|-|14q12|protein-coding	647.103	0.349438	0.0730997	4.7803	1.75036e-06	2.37818e-05	26277	TINF2
RPS7|DBA8|S7|-|2p25.3|protein-coding	660.14	-0.585868	0.122645	-4.77693	1.77989e-06	2.41636e-05	6201	RPS7
MPRIP|M-RIP|MRIP|RHOIP3|RIP3|p116Rip|-|17p11.2|protein-coding	3757.93	0.487403	0.102036	4.77676	1.78139e-06	2.41645e-05	23164	MPRIP
TEPSIN|C17orf56|ENTHD2|-|17q25.3|protein-coding	290.297	0.533289	0.111694	4.77454	1.80116e-06	2.44132e-05	146705	TEPSIN
TBX18|CAKUT2|-|6q14.3|protein-coding	607.031	-1.0982	0.230156	-4.77155	1.82818e-06	2.47595e-05	9096	TBX18
FAM167A|C8orf13|D8S265|-|8p23.1|protein-coding	1020.66	-1.00674	0.210995	-4.77137	1.82978e-06	2.47613e-05	83648	FAM167A
INO80C|C18orf37|IES6|hIes6|-|18q12.2|protein-coding	131.162	1.32284	0.277307	4.7703	1.83956e-06	2.48737e-05	125476	INO80C
EXTL3|BOTV|EXTL1L|EXTR1|REGR|RPR|-|8p21.1|protein-coding	1334.34	0.707795	0.1484	4.76952	1.84669e-06	2.49503e-05	2137	EXTL3
RPSA|37LRP|67LR|ICAS|LAMBR|LAMR1|LBP|LBP/p40|LRP|LRP/LR|NEM/1CHD4|SA|lamR|p40|-|3p22.1|protein-coding	1762.87	-0.729459	0.152965	-4.7688	1.85324e-06	2.50188e-05	3921	RPSA
TUSC1|TSG-9|TSG9|-|9p21.2|protein-coding	201.218	-0.997705	0.209282	-4.76728	1.86726e-06	2.51879e-05	286319	TUSC1
FOPNL|C16orf63|FOR20|PHSECRG2|-|16p13.11|protein-coding	515.666	-0.667191	0.139967	-4.76678	1.87197e-06	2.52313e-05	123811	FOPNL
REPIN1|AP4|RIP60|ZNF464|Zfp464|-|7q36.1|protein-coding	1019.91	0.730766	0.153309	4.76661	1.87352e-06	2.52321e-05	29803	REPIN1
RNF169|-|-|11q13.4|protein-coding	418.869	0.738424	0.154933	4.7661	1.87827e-06	2.52759e-05	254225	RNF169
GLIPR1|CRISP7|GLIPR|RTVP1|-|12q21.2|protein-coding	1869.76	-1.4524	0.304821	-4.76478	1.89059e-06	2.54214e-05	11010	GLIPR1
AGPAT5|1AGPAT5|LPAATE|-|8p23.1|protein-coding	670.727	1.47634	0.309985	4.76263	1.91082e-06	2.56731e-05	55326	AGPAT5
CDC42SE2|SPEC2|-|5q31.1|protein-coding	436.057	0.620983	0.13047	4.75957	1.94003e-06	2.60448e-05	56990	CDC42SE2
KLF3|BKLF|-|4p14|protein-coding	1287.04	0.760217	0.159932	4.75338	2.00044e-06	2.68345e-05	51274	KLF3
RAB43|RAB11B|RAB41|-|3q21.3|protein-coding	107.065	0.943058	0.198414	4.75298	2.00445e-06	2.68669e-05	339122	RAB43
CD68|GP110|LAMP4|SCARD1|-|17p13.1|protein-coding	1418.68	-1.30831	0.275318	-4.752	2.01411e-06	2.69584e-05	968	CD68
RPS5|S5|-|19q13.43|protein-coding	6573.94	-0.691393	0.145496	-4.75197	2.01447e-06	2.69584e-05	6193	RPS5
RPL8|L8|-|8q24.3|protein-coding	13164.1	-0.709542	0.149333	-4.75142	2.01996e-06	2.70106e-05	6132	RPL8
EXOC2|SEC5|SEC5L1|Sec5p|-|6p25.3|protein-coding	566.99	0.46582	0.0980505	4.75081	2.02599e-06	2.70698e-05	55770	EXOC2
SCN11A|FEPS3|HSAN7|NAV1.9|NaN|PN5|SCN12A|SNS-2|-|3p22.2|protein-coding	11.8147	4.8148	1.01361	4.75016	2.0326e-06	2.71367e-05	11280	SCN11A
FLT1|FLT|FLT-1|VEGFR-1|VEGFR1|-|13q12.3|protein-coding	1153.24	2.50987	0.528614	4.74803	2.05411e-06	2.74021e-05	2321	FLT1
AP3S1|CLAPS3|Sigma3A|-|5q22.3-q23.1|protein-coding	1281.37	-0.824868	0.173761	-4.74715	2.06307e-06	2.75e-05	1176	AP3S1
LRRC8A|AGM5|LRRC8|SWELL1|-|9q34.11|protein-coding	1980.13	0.913052	0.192536	4.74223	2.11378e-06	2.81316e-05	56262	LRRC8A
LOC101929340|-|-|11q24.2|ncRNA	4.80841	4.74716	1.00103	4.74228	2.11324e-06	2.81316e-05	101929340	LOC101929340
EID1|C15orf3|CRI1|EID-1|IRO45620|PNAS-22|PTD014|RBP21|-|15q21.1|protein-coding	2359.98	-0.686506	0.144795	-4.74124	2.12417e-06	2.82476e-05	23741	EID1
CSF2RB|CD131|CDw131|IL3RB|IL5RB|SMDP5|-|22q12.3|protein-coding	3.00876	5.07747	1.07115	4.74019	2.13516e-06	2.83715e-05	1439	CSF2RB
RNF152|-|-|18q21.33|protein-coding	111.468	1.02283	0.215885	4.73783	2.16014e-06	2.86808e-05	220441	RNF152
BAZ2A|TIP5|WALp3|-|12q13.3|protein-coding	2132.67	0.674629	0.142442	4.73617	2.178e-06	2.88726e-05	11176	BAZ2A
PHYHD1|-|-|9q34.11|protein-coding	176.248	-1.33012	0.280841	-4.73619	2.17775e-06	2.88726e-05	254295	PHYHD1
RPL19|L19|-|17q12|protein-coding	11262.5	-0.524178	0.110686	-4.73571	2.1829e-06	2.89149e-05	6143	RPL19
DENND4B|KIAA0476|-|1q21.3|protein-coding	757.563	0.733759	0.155006	4.73374	2.20417e-06	2.91543e-05	9909	DENND4B
ACR|-|-|22q13.33|protein-coding	3.65558	5.36188	1.1327	4.73372	2.20442e-06	2.91543e-05	49	ACR
SLC39A6|LIV-1|ZIP6|-|18q12.2|protein-coding	1038.49	-0.649795	0.137305	-4.73248	2.21796e-06	2.93104e-05	25800	SLC39A6
TAF10|TAF2A|TAF2H|TAFII30|-|11p15.4|protein-coding	716.624	-0.669481	0.141472	-4.73225	2.22043e-06	2.93202e-05	6881	TAF10
RPL26L1|RPL26P1|-|5q35.1|protein-coding	101.13	-0.740428	0.156484	-4.73167	2.22684e-06	2.93818e-05	51121	RPL26L1
PTPN4|MEG|PTPMEG|PTPMEG1|-|2q14.2|protein-coding	226.911	0.890505	0.188241	4.73067	2.23782e-06	2.95036e-05	5775	PTPN4
FOXJ3|-|-|1p34.2|protein-coding	1111.82	0.602108	0.127359	4.72763	2.27151e-06	2.99245e-05	22887	FOXJ3
SLC26A2|D5S1708|DTD|DTDST|EDM4|MST153|MSTP157|-|5q32|protein-coding	532.355	0.730453	0.154544	4.72651	2.28412e-06	3.00671e-05	1836	SLC26A2
PIEZO1|DHS|FAM38A|LMPH3|Mib|-|16q24.3|protein-coding	5319.75	0.607069	0.128486	4.7248	2.30346e-06	3.02982e-05	9780	PIEZO1
CD38|ADPRC 1|ADPRC1|-|4p15.32|protein-coding	8.45802	5.58477	1.18207	4.72458	2.30597e-06	3.03075e-05	952	CD38
HID1-AS1|-|-|17q25.1|ncRNA	3.31003	4.70198	0.99558	4.72285	2.32563e-06	3.05421e-05	102723641	HID1-AS1
ATXN7L3|-|-|17q21.31|protein-coding	1274.35	0.345247	0.0731053	4.7226	2.32853e-06	3.05549e-05	56970	ATXN7L3
RGP1|KIAA0258|-|9p13.3|protein-coding	238.592	0.754067	0.159677	4.72245	2.33022e-06	3.05549e-05	9827	RGP1
SFI1|PISD|PPP1R139|hSfi1p|-|22q12.2|protein-coding	277.715	0.57471	0.121733	4.72107	2.34602e-06	3.07372e-05	9814	SFI1
TMEM258|C11orf10|-|11q12.2|protein-coding	810.904	-0.527534	0.111748	-4.72077	2.34958e-06	3.07372e-05	746	TMEM258
PIP5K1C|LCCS3|PIP5K-GAMMA|PIP5K1-gamma|PIP5Kgamma|-|19p13.3|protein-coding	1747.22	0.699324	0.148134	4.72089	2.34811e-06	3.07372e-05	23396	PIP5K1C
ZNF750|ZFP750|-|17q25.3|protein-coding	3.43692	4.76468	1.00942	4.7202	2.35618e-06	3.07998e-05	79755	ZNF750
OAS2|-|-|12q24.13|protein-coding	216.771	1.73072	0.366685	4.71991	2.3595e-06	3.08194e-05	4939	OAS2
LINC00642|-|-|14q32.11|ncRNA	4.48877	5.1564	1.093	4.71768	2.38548e-06	3.11346e-05	400238	LINC00642
RPL24|HEL-S-310|L24|-|3q12.3|protein-coding	3317.68	-0.581805	0.123422	-4.71396	2.42949e-06	3.16846e-05	6152	RPL24
PROCR|CCCA|CCD41|EPCR|-|20q11.22|protein-coding	727.625	1.52911	0.324464	4.71273	2.44414e-06	3.18511e-05	10544	PROCR
TSTA3|FX|P35B|SDR4E1|-|8q24.3|protein-coding	538.188	0.96064	0.203942	4.71036	2.47274e-06	3.21989e-05	7264	TSTA3
ZNF609|-|-|15q22.31|protein-coding	1060.28	0.779077	0.165446	4.70895	2.48995e-06	3.23981e-05	23060	ZNF609
PRKG1|AAT8|PKG|PRKG1B|PRKGR1B|cGK|cGK 1|cGK1|cGKI|cGKI-BETA|cGKI-alpha|-|10q11.23-q21.1|protein-coding	385.699	-0.977956	0.207724	-4.70796	2.50206e-06	3.25307e-05	5592	PRKG1
COX6B1|COX6B|COXG|COXVIb1|-|19q13.12|protein-coding	1018.34	-0.58814	0.125158	-4.6992	2.61188e-06	3.39323e-05	1340	COX6B1
FAM198B|AD021|AD036|C4orf18|ENED|-|4q32.1|protein-coding	1594.24	1.47568	0.314077	4.69845	2.62141e-06	3.403e-05	51313	FAM198B
ZFHX4-AS1|-|-|8q21.13|ncRNA	18.516	2.61665	0.557164	4.69638	2.64817e-06	3.4351e-05	100192378	ZFHX4-AS1
RAD23B|HHR23B|HR23B|P58|-|9q31.2|protein-coding	2771.36	-0.459659	0.0979437	-4.69309	2.69109e-06	3.48809e-05	5887	RAD23B
TLL1|ASD6|TLL|-|4q32.3|protein-coding	21.613	4.25843	0.90757	4.69213	2.70376e-06	3.50183e-05	7092	TLL1
PRPSAP1|PAP39|-|17q25.1|protein-coding	600.183	0.725407	0.154763	4.68722	2.76945e-06	3.58417e-05	5635	PRPSAP1
STRADB|ALS2CR2|CALS-21|ILPIP|ILPIPA|PAPK|PRO1038|-|2q33.1|protein-coding	220.352	-0.690904	0.147438	-4.68608	2.78493e-06	3.60144e-05	55437	STRADB
NES|Nbla00170|-|1q23.1|protein-coding	3163.07	1.23546	0.263689	4.68531	2.79531e-06	3.61211e-05	10763	NES
THSD4|ADAMTSL-6|ADAMTSL6|FVSY9334|PRO34005|-|15q23|protein-coding	900.603	1.20365	0.257051	4.68253	2.83351e-06	3.65867e-05	79875	THSD4
GTF2H5|C6orf175|TFB5|TFIIH|TGF2H5|TTD|TTD-A|TTD3|TTDA|bA120J8.2|-|6q25.3|protein-coding	438.399	-0.646387	0.138063	-4.68184	2.84316e-06	3.66553e-05	404672	GTF2H5
MDS2|-|-|1p36.11|protein-coding	3.63975	4.84276	1.03436	4.68188	2.8425e-06	3.66553e-05	259283	MDS2
EBPL|EBRP|-|13q14.2|protein-coding	368.902	-0.736176	0.157298	-4.68014	2.86683e-06	3.69323e-05	84650	EBPL
RPS6KA1|HU-1|MAPKAPK1A|RSK|RSK1|p90Rsk|-|1p36.11|protein-coding	24.457	1.73464	0.370782	4.67833	2.89214e-06	3.72017e-05	6195	RPS6KA1
LRCH4|LRN|LRRN1|LRRN4|PP14183|-|7q22.1|protein-coding	499.799	0.896701	0.191665	4.67849	2.89002e-06	3.72017e-05	4034	LRCH4
CERS2|L3|LASS2|SP260|TMSG1|-|1q21.3|protein-coding	2437.8	-0.27359	0.0585065	-4.67623	2.92198e-06	3.75569e-05	29956	CERS2
DNPH1|C6orf108|RCL|dJ330M21.3|-|6p21.1|protein-coding	256.524	-0.986271	0.210931	-4.6758	2.92813e-06	3.76073e-05	10591	DNPH1
PHTF1|PHTF|-|1p13.2|protein-coding	311.332	0.706599	0.151149	4.67485	2.94169e-06	3.7667e-05	10745	PHTF1
SLC38A1|ATA1|NAT2|SAT1|SNAT1|-|12q13.11|protein-coding	2912.39	2.7253	0.582918	4.67527	2.93572e-06	3.7667e-05	81539	SLC38A1
SLC12A5|EIEE34|EIG14|KCC2|hKCC2|-|20q13.12|protein-coding	3.25934	5.20092	1.11251	4.67494	2.94046e-06	3.7667e-05	57468	SLC12A5
HCP5|6S2650E|D6S2650E|P5-1|-|6p21.33|ncRNA	10.448	3.30063	0.706024	4.67495	2.94029e-06	3.7667e-05	10866	HCP5
SEMA3G|sem2|-|3p21.1|protein-coding	152.824	3.21065	0.687175	4.67224	2.97928e-06	3.81194e-05	56920	SEMA3G
MMP28|EPILYSIN|MM28|MMP-25|MMP-28|MMP25|-|17q12|protein-coding	10.828	2.59319	0.555727	4.66631	3.06655e-06	3.92064e-05	79148	MMP28
PFN2|D3S1319E|PFL|-|3q25.1|protein-coding	3189.54	-1.40838	0.301998	-4.66353	3.10826e-06	3.97096e-05	5217	PFN2
CCDC80|DRO1|SSG1|URB|okuribin|-|3q13.2|protein-coding	10729.6	-0.959293	0.205766	-4.66207	3.13049e-06	3.99634e-05	151887	CCDC80
PARP12|ARTD12|MST109|MSTP109|ZC3H1|ZC3HDC1|-|7q34|protein-coding	366.493	1.82129	0.39071	4.6615	3.1392e-06	4.00443e-05	64761	PARP12
MAGI2-AS3|-|-|7q21.11|ncRNA	681.538	-0.618784	0.132825	-4.65864	3.18312e-06	4.0574e-05	100505881	MAGI2-AS3
PIGG|GPI7|LAS21|MRT53|PRO4405|RLGS1930|-|4p16.3|protein-coding	697.278	0.490614	0.105344	4.65728	3.20422e-06	4.08122e-05	54872	PIGG
KCTD9|BTBD27|-|8p21.2|protein-coding	533.296	-0.551309	0.118417	-4.65565	3.22964e-06	4.11049e-05	54793	KCTD9
NFKBIE|IKBE|-|6p21.1|protein-coding	136.863	1.08389	0.23291	4.6537	3.26039e-06	4.14339e-05	4794	NFKBIE
GCHFR|GFRP|HsT16933|P35|-|15q15.1|protein-coding	61.8129	3.4391	0.738982	4.65384	3.25811e-06	4.14339e-05	2644	GCHFR
RACK1|GNB2L1|Gnb2-rs1|H12.3|HLC-7|PIG21|-|5q35.3|protein-coding	18391.4	-0.506794	0.108918	-4.65299	3.27153e-06	4.15438e-05	10399	RACK1
MRC1|CD206|CLEC13D|CLEC13DL|MMR|MRC1L1|bA541I19.1|hMR|-|10p12.33|protein-coding	4.48299	5.6593	1.21631	4.65284	3.27395e-06	4.15438e-05	4360	MRC1
HECTD1|EULIR|-|14q12|protein-coding	2783.45	0.477051	0.102624	4.64852	3.34332e-06	4.23604e-05	25831	HECTD1
NDUFAF2|B17.2L|MMTN|NDUFA12L|mimitin|-|5q12.1|protein-coding	194.499	-0.929152	0.199878	-4.64859	3.34219e-06	4.23604e-05	91942	NDUFAF2
RAG1|RAG-1|RNF74|-|11p12|protein-coding	39.939	1.20272	0.258753	4.64812	3.34971e-06	4.24095e-05	5896	RAG1
IMPAD1|GPAPP|IMP 3|IMP-3|IMPA3|-|8q12.1|protein-coding	1759.69	-0.435676	0.0937403	-4.64769	3.35669e-06	4.24485e-05	54928	IMPAD1
CYP2S1|CYPIIS1|-|19q13.2|protein-coding	10.4265	5.89173	1.26769	4.64762	3.3578e-06	4.24485e-05	29785	CYP2S1
EXD3|mut-7|-|9q34.3|protein-coding	131.043	1.44732	0.31158	4.64511	3.39896e-06	4.29366e-05	54932	EXD3
ERP27|C12orf46|PDIA8|-|12p12.3|protein-coding	6.10139	3.82036	0.823502	4.63916	3.49823e-06	4.41576e-05	121506	ERP27
SEPT1|DIFF6|LARP|PNUTL3|SEP1|-|16p11.2|protein-coding	41.4873	-1.21365	0.261641	-4.6386	3.50779e-06	4.42453e-05	1731	2019-09-01
KIAA1462|JCAD|-|10p11.23|protein-coding	7033.23	1.24056	0.267525	4.63719	3.53183e-06	4.45153e-05	57608	KIAA1462
SLFN12|SLFN3|-|17q12|protein-coding	168.929	0.675461	0.145729	4.63506	3.5683e-06	4.49415e-05	55106	SLFN12
RC3H2|MNAB|RNF164|-|9q33.2|protein-coding	549.162	0.984232	0.212382	4.63425	3.58242e-06	4.50857e-05	54542	RC3H2
SPTAN1|EIEE5|NEAS|SPTA2|-|9q34.11|protein-coding	7707.98	0.834536	0.180138	4.63276	3.60819e-06	4.53763e-05	6709	SPTAN1
RPL27A|L27A|-|11p15.4|protein-coding	5572.57	-0.562653	0.121461	-4.63238	3.61481e-06	4.54256e-05	6157	RPL27A
BRWD3|BRODL|MRX93|-|Xq21.1|protein-coding	277.56	0.640066	0.138179	4.63216	3.61872e-06	4.54411e-05	254065	BRWD3
LEFTY2|EBAF|LEFTA|LEFTYA|TGFB4|-|1q42.12|protein-coding	2.80404	4.97966	1.07514	4.63165	3.6277e-06	4.552e-05	7044	LEFTY2
EGLN1|C1orf12|ECYT3|HALAH|HIF-PH2|HIFPH2|HPH-2|HPH2|PHD2|SM20|ZMYND6|-|1q42.2|protein-coding	1204.25	0.708212	0.152976	4.62955	3.66458e-06	4.59146e-05	54583	EGLN1
KDM1B|AOF1|C6orf193|LSD2|bA204B7.3|dJ298J15.2|-|6p22.3|protein-coding	316.473	-0.689307	0.148891	-4.62961	3.66354e-06	4.59146e-05	221656	KDM1B
GSE1|CRHSP24|KIAA0182|-|16q24.1|protein-coding	982.585	-0.651008	0.140637	-4.62899	3.67456e-06	4.60056e-05	23199	GSE1
KRT42P|-|-|17q21.2|pseudo	12.6666	6.66348	1.43981	4.62803	3.69157e-06	4.61842e-05	284116	KRT42P
MRPL37|L2mt|L37mt|MRP-L2|MRP-L37|MRPL2|RPML2|-|1p32.3|protein-coding	979.734	-0.521675	0.112749	-4.62688	3.71212e-06	4.6407e-05	51253	MRPL37
RIDA|HRSP12|P14.5|PSP|UK114|-|8q22.2|protein-coding	200.26	-0.883976	0.191081	-4.6262	3.7244e-06	4.65261e-05	10247	RIDA
CDC37L1|CDC37B|HARC|-|9p24.1|protein-coding	267.848	-0.646673	0.139805	-4.62553	3.73642e-06	4.66417e-05	55664	CDC37L1
GNPTAB|GNPTA|ICD|-|12q23.2|protein-coding	642.024	0.54324	0.117452	4.62519	3.7426e-06	4.66845e-05	79158	GNPTAB
ZNF839|C14orf131|-|14q32.31|protein-coding	172.909	0.4614	0.0997665	4.6248	3.74953e-06	4.67364e-05	55778	ZNF839
CRYGS|CRYG8|CTRCT20|-|3q27.3|protein-coding	42.5684	0.923268	0.199663	4.62413	3.76169e-06	4.68534e-05	1427	CRYGS
MIR935|MIRN935|hsa-mir-935|mir-935|-|19q13.42|ncRNA	3.46412	5.27995	1.14213	4.62289	3.78431e-06	4.71005e-05	100126325	MIR935
CACNG6|-|-|19q13.42|protein-coding	7.72624	4.96883	1.07507	4.62185	3.80328e-06	4.73018e-05	59285	CACNG6
ZNF653|E430039K05Rik|ZIP67|-|19p13.2|protein-coding	56.0838	0.835934	0.180916	4.62056	3.82702e-06	4.75326e-05	115950	ZNF653
ZBTB46|BTBD4|BZEL|RINZF|ZNF340|dJ583P15.7|dJ583P15.8|-|20q13.33|protein-coding	176.506	2.05071	0.443824	4.62054	3.82747e-06	4.75326e-05	140685	ZBTB46
FAU|FAU1|Fub1|Fubi|MNSFbeta|RPS30|S30|asr1|-|11q13.1|protein-coding	2525.15	-0.55879	0.120977	-4.619	3.856e-06	4.78518e-05	2197	FAU
MFF|C2orf33|EMPF2|GL004|-|2q36.3|protein-coding	695.663	-0.337179	0.0730088	-4.61833	3.86846e-06	4.79712e-05	56947	MFF
SERF2-C15ORF63|-|-|15q15.3|ncRNA	766.234	-0.613398	0.132886	-4.61595	3.91293e-06	4.8487e-05	100529067	SERF2-C15ORF63
DOC2B|DOC2BL|-|17p13.3|protein-coding	5.37206	5.41301	1.17273	4.61574	3.91699e-06	4.85018e-05	8447	DOC2B
KAT2B|CAF|P/CAF|PCAF|-|3p24.3|protein-coding	477.388	0.672184	0.145687	4.61388	3.95218e-06	4.89017e-05	8850	KAT2B
RPS29|DBA13|S29|-|14q21.3|protein-coding	1896.97	-0.789058	0.171041	-4.61327	3.96389e-06	4.90107e-05	6235	RPS29
PRR29-AS1|-|-|17q23.3|ncRNA	2.62615	4.88639	1.05934	4.61266	3.97549e-06	4.91182e-05	400612	PRR29-AS1
IBA57|C1orf69|MMDS3|SPG74|-|1q42.13|protein-coding	162.058	0.604383	0.131089	4.61048	4.01741e-06	4.95999e-05	200205	IBA57
LOC100507472|-|-|15q26.3|ncRNA	7.76765	4.53125	0.983035	4.60945	4.0373e-06	4.9809e-05	100507472	LOC100507472
C12orf29|-|-|12q21.32|protein-coding	263.373	-0.762899	0.165552	-4.60821	4.06145e-06	5.00705e-05	91298	C12orf29
GGA3|-|-|17q25.1|protein-coding	608.051	0.517795	0.112393	4.607	4.08514e-06	5.03073e-05	23163	GGA3
TNFRSF18|AITR|CD357|GITR|GITR-D|-|1p36.33|protein-coding	5.844	3.01341	0.654104	4.60693	4.08662e-06	5.03073e-05	8784	TNFRSF18
AGAP7P|AGAP-7|AGAP7|CTGLF4|bA109G10.1|-|10q11.22|pseudo	5.33946	4.39675	0.954519	4.60624	4.10006e-06	5.04362e-05	653268	AGAP7P
PDK4|-|-|7q21.3|protein-coding	260.227	2.44396	0.53072	4.60498	4.12496e-06	5.07055e-05	5166	PDK4
LRRC75A-AS1|C17orf45|C17orf76-AS1|FAM211A-AS1|NCRNA00188|TSAP19|-|17p11.2|ncRNA	6749.11	-0.601843	0.130726	-4.60386	4.14741e-06	5.09288e-05	125144	LRRC75A-AS1
FAM118B|-|-|11q24.2|protein-coding	329.239	0.58074	0.126144	4.60377	4.14915e-06	5.09288e-05	79607	FAM118B
PDLIM4|RIL|-|5q31.1|protein-coding	633.05	-0.633162	0.137588	-4.60186	4.18738e-06	5.13608e-05	8572	PDLIM4
EGLN2|EIT6|HIF-PH1|HIFPH1|HPH-1|HPH-3|PHD1|-|19q13.2|protein-coding	999.108	0.475214	0.103299	4.60039	4.21695e-06	5.16859e-05	112398	EGLN2
RGL1|RGL|-|1q25.3|protein-coding	598.671	1.3347	0.29016	4.5999	4.227e-06	5.17716e-05	23179	RGL1
TMED7|CGI-109|p24g3|p24gamma3|p27|-|5q22.3|protein-coding	1128.33	-0.59684	0.12978	-4.59885	4.24837e-06	5.19956e-05	51014	TMED7
NXN|NRX|TRG-4|-|17p13.3|protein-coding	775.089	-0.983137	0.213843	-4.59747	4.2766e-06	5.23032e-05	64359	NXN
TNFRSF1B|CD120b|TBPII|TNF-R-II|TNF-R75|TNFBR|TNFR1B|TNFR2|TNFR80|p75|p75TNFR|-|1p36.22|protein-coding	290.785	1.06507	0.231754	4.59566	4.31377e-06	5.27197e-05	7133	TNFRSF1B
ATP5J|ATP5|ATP5A|ATPM|CF6|F6|-|21q21.3|protein-coding	766.236	-0.51418	0.111902	-4.59493	4.32885e-06	5.28276e-05	522	ATP5J
TLCD1|-|-|17q11.2|protein-coding	71.1561	-1.29753	0.282377	-4.59503	4.32693e-06	5.28276e-05	116238	TLCD1
LGALS9|HUAT|LGALS9A|-|17q11.2|protein-coding	106.021	2.84359	0.619172	4.59257	4.37822e-06	5.3353e-05	3965	LGALS9
KLHL5|-|-|4p14|protein-coding	1003.49	1.36196	0.296548	4.5927	4.3755e-06	5.3353e-05	51088	KLHL5
YAP1|COB1|YAP|YAP2|YAP65|YKI|-|11q22.1|protein-coding	2760.44	-0.848581	0.18503	-4.58617	4.51449e-06	5.4974e-05	10413	YAP1
ALKBH2|ABH2|-|12q24.11|protein-coding	161.722	-0.725171	0.158135	-4.58577	4.52319e-06	5.50403e-05	121642	ALKBH2
SUN2|UNC84B|-|22q13.1|protein-coding	1829.08	0.971241	0.211977	4.58182	4.60956e-06	5.60509e-05	25777	SUN2
SRM|PAPT|SPDSY|SPS1|SRML1|-|1p36.22|protein-coding	1061.99	-0.842575	0.183912	-4.58141	4.61857e-06	5.61201e-05	6723	SRM
COA6|C1orf31|CEMCOX4|-|1q42.2|protein-coding	163.742	-0.872073	0.190363	-4.58111	4.62518e-06	5.616e-05	388753	COA6
MAPRE3|EB3|EBF3|EBF3-S|RP3|-|2p23.3|protein-coding	111.778	-0.991209	0.216546	-4.57736	4.70871e-06	5.71332e-05	22924	MAPRE3
MRPS21|MDS016|MRP-S21|RPMS21|-|1q21.2|protein-coding	788.894	-0.504066	0.110175	-4.57515	4.75868e-06	5.76981e-05	54460	MRPS21
HIBADH|NS5ATP1|-|7p15.2|protein-coding	672.529	-0.626396	0.136976	-4.57304	4.80692e-06	5.82413e-05	11112	HIBADH
BMPR1A|10q23del|ACVRLK3|ALK3|CD292|SKR5|-|10q23.2|protein-coding	130.5	-1.09246	0.238997	-4.57104	4.85315e-06	5.87593e-05	657	BMPR1A
PIWIL3|HIWI3|-|22q11.23|protein-coding	9.95616	6.31319	1.3815	4.56981	4.88176e-06	5.90634e-05	440822	PIWIL3
OAZ1|AZI|OAZ|-|19p13.3|protein-coding	6276.73	-0.608355	0.133171	-4.56822	4.91891e-06	5.94702e-05	4946	OAZ1
TNS1|MST091|MST122|MST127|MSTP091|MSTP122|MSTP127|MXRA6|PPP1R155|TNS|-|2q35|protein-coding	5766.91	0.670255	0.146774	4.56657	4.95767e-06	5.98961e-05	7145	TNS1
NUDT4P1|-|-|1q21.2|pseudo	391.101	1.12231	0.245911	4.56388	5.02165e-06	6.05824e-05	440672	NUDT4P1
NUDT4P2|-|-|1q21.1|pseudo	391.101	1.12231	0.245911	4.56388	5.02165e-06	6.05824e-05	170688	NUDT4P2
UBQLN2|ALS15|CHAP1|DSK2|HRIHFB2157|N4BP4|PLIC2|-|Xp11.21|protein-coding	615.049	-0.401463	0.0880057	-4.56178	5.07212e-06	6.11476e-05	29978	UBQLN2
CCDC74A|-|-|2q21.1|protein-coding	54.1398	-0.938332	0.205714	-4.56134	5.08288e-06	6.11974e-05	90557	CCDC74A
LOC100507006|-|-|2p14|ncRNA	3.83771	4.92599	1.07995	4.56131	5.08349e-06	6.11974e-05	100507006	LOC100507006
NMI|-|-|2q23.3|protein-coding	202.309	1.19196	0.261363	4.56057	5.10152e-06	6.13707e-05	9111	NMI
KIFC3|-|-|16q21|protein-coding	600.005	0.906999	0.198925	4.55951	5.12729e-06	6.16369e-05	3801	KIFC3
ANAPC11|APC11|Apc11p|HSPC214|-|17q25.3|protein-coding	728.993	-0.637188	0.139754	-4.55935	5.13132e-06	6.16414e-05	51529	ANAPC11
BCL2L1|BCL-XL/S|BCL2L|BCLX|Bcl-X|PPP1R52|-|20q11.21|protein-coding	2181.06	-0.483532	0.106129	-4.55608	5.21169e-06	6.25625e-05	598	BCL2L1
TGFBR3L|TGFR-3L|-|19p13.2|protein-coding	48.7227	-1.68559	0.370068	-4.55482	5.24303e-06	6.2894e-05	100507588	TGFBR3L
BIN1|AMPH2|AMPHL|SH3P9|-|2q14.3|protein-coding	776.161	1.03313	0.22688	4.55364	5.27255e-06	6.32033e-05	274	BIN1
MID1IP1|G12-like|MIG12|S14R|STRAIT11499|THRSPL|-|Xp11.4|protein-coding	894.946	-0.734811	0.161489	-4.55023	5.35872e-06	6.41907e-05	58526	MID1IP1
RGS19|GAIP|RGSGAIP|-|20q13.33|protein-coding	169.555	0.916216	0.201392	4.54941	5.37956e-06	6.43947e-05	10287	RGS19
VWA1|WARP|-|1p36.33|protein-coding	189.673	1.84075	0.404742	4.54795	5.41702e-06	6.47972e-05	64856	VWA1
NDUFA11|B14.7|CI-B14.7|-|19p13.3|protein-coding	930.887	-0.580474	0.127715	-4.54507	5.49167e-06	6.56437e-05	126328	NDUFA11
ST3GAL1|Gal-NAc6S|SIAT4A|SIATFL|ST3GalA|ST3GalA.1|ST3GalIA|ST3GalIA,1|ST3O|-|8q24.22|protein-coding	1270.66	1.2332	0.271403	4.5438	5.52503e-06	6.59958e-05	6482	ST3GAL1
LRRC8C|AD158|FAD158|-|1p22.2|protein-coding	647.461	1.81679	0.399865	4.54352	5.5323e-06	6.60015e-05	84230	LRRC8C
BLOC1S1-RDH5|-|-|12q13.2|ncRNA	427.266	-0.880896	0.193881	-4.54348	5.53331e-06	6.60015e-05	100528022	BLOC1S1-RDH5
SLC8A3|NCX3|-|14q24.2|protein-coding	3.26405	5.19602	1.1443	4.54077	5.60491e-06	6.68083e-05	6547	SLC8A3
NR5A2|B1F|B1F2|CPF|FTF|FTZ-F1|FTZ-F1beta|LRH-1|LRH1|hB1F-2|-|1q32.1|protein-coding	45.3475	3.95049	0.870097	4.54029	5.61773e-06	6.69139e-05	2494	NR5A2
C11orf70|-|-|11q22.1|protein-coding	72.1506	-1.5775	0.347617	-4.53804	5.67797e-06	6.75838e-05	85016	C11orf70
HERC2P2|D15F37S3|MN7|-|15q11.2|pseudo	686.496	1.36378	0.30061	4.53672	5.71362e-06	6.79603e-05	400322	HERC2P2
PRKAR1B|PRKAR1|-|7p22.3|protein-coding	188.407	1.41599	0.312216	4.53529	5.75249e-06	6.83745e-05	5575	PRKAR1B
RMND5B|GID2|GID2B|-|5q35.3|protein-coding	240.999	1.37254	0.302759	4.53343	5.80339e-06	6.89197e-05	64777	RMND5B
LZTS1|F37|FEZ1|-|8p21.3|protein-coding	175.85	-1.05994	0.233812	-4.53331	5.80651e-06	6.89197e-05	11178	LZTS1
CRTAC1|ASPIC|ASPIC1|CEP-68|-|10q24.2|protein-coding	16.0788	5.26403	1.16135	4.53269	5.82372e-06	6.90755e-05	55118	CRTAC1
OAS1|E18/E16|IFI-4|OIAS|OIASI|-|12q24.13|protein-coding	32.6718	3.2738	0.723071	4.52762	5.96504e-06	7.07021e-05	4938	OAS1
SLC9A3R2|E3KARP|NHE3RF2|NHERF-2|NHERF2|OCTS2|SIP-1|SIP1|TKA-1|-|16p13.3|protein-coding	1304.8	0.734842	0.162432	4.52399	6.06854e-06	7.18784e-05	9351	SLC9A3R2
ABTB1|BPOZ|BTB3|BTBD21|EF1ABP|PP2259|-|3q21.3|protein-coding	388.787	0.936148	0.207152	4.51914	6.20903e-06	7.34909e-05	80325	ABTB1
CD2AP|CMS|-|6p12.3|protein-coding	504.054	0.638983	0.141401	4.51895	6.21483e-06	7.35081e-05	23607	CD2AP
MYLK2|KMLC|MLCK|MLCK2|skMLCK|-|20q11.21|protein-coding	7.10176	3.32567	0.736131	4.51777	6.24935e-06	7.38647e-05	85366	MYLK2
AURKAIP1|AIP|AKIP|MRP-S38|-|1p36.33|protein-coding	749.268	-0.548805	0.12153	-4.51582	6.30732e-06	7.44978e-05	54998	AURKAIP1
ZNF771|DSC43|-|16p11.2|protein-coding	120.357	-0.689683	0.152747	-4.51518	6.32624e-06	7.46691e-05	51333	ZNF771
PLEKHO2|PLEKHQ1|PP1628|pp9099|-|15q22.31|protein-coding	1657.12	1.10795	0.245692	4.50951	6.49772e-06	7.65861e-05	80301	PLEKHO2
PCDHB14|PCDH-BETA14|-|5q31.3|protein-coding	74.0775	1.40924	0.3125	4.50958	6.49565e-06	7.65861e-05	56122	PCDHB14
VPS13A|CHAC|CHOREIN|-|9q21.2|protein-coding	626.795	0.77901	0.172827	4.50746	6.56094e-06	7.72774e-05	23230	VPS13A
NT5E|CALJA|CD73|E5NT|NT|NT5|NTE|eN|eNT|-|6q14.3|protein-coding	9206.45	-0.580504	0.128801	-4.50697	6.57599e-06	7.74007e-05	4907	NT5E
[truncated: 25,706 more rows]

## Sheet: young_vs_old_edgeR_iSM
	logFC	logCPM	LR	PValue	FDR	GeneID	Symbol
[truncated: 27,142 more rows]

[truncated: 2 more sheets: HGPS_vs_normal_edgeR_iSM, fibro_vs_GEOsmooth_edgeR_iSM_cl]
