# Supplementary material for: Direct reprogramming of human smooth muscle and vascular endothelial cells reveals defects associated with aging and Hutchinson-Gilford progeria syndrome
Source: eLife. 2020 Sep 8;9:e54383. doi: 10.7554/eLife.54383 (PMC7478891; doi:10.7554/eLife.54383)
Supplement: Figure 1—source data 2. [file elife-54383-fig1-data2.xlsx]

## Sheet: 1780_DEgenes_endo_vs_fibro
ANNO	cluster	GeneID
ZDHHC14|NEW1CP|-|6q25.3|protein-coding	3	79683
KCNJ5|CIR|GIRK4|KATP1|KIR3.4|LQT13|-|11q24.3|protein-coding	3	3762
HOXD9|HOX4|HOX4C|Hox-4.3|Hox-5.2|-|2q31.1|protein-coding	3	3235
PRKAR1B|PRKAR1|-|7p22.3|protein-coding	3	5575
RHBDF2|RHBDL5|RHBDL6|TEC|TOC|TOCG|iRhom2|-|17q25.1|protein-coding	3	79651
NOTCH4|INT3|-|6p21.32|protein-coding	3	4855
HES2|bHLHb40|-|1p36.31|protein-coding	3	54626
IFIH1|AGS7|Hlcd|IDDM19|MDA-5|MDA5|RLR-2|SGMRT1|-|2q24.2|protein-coding	3	64135
HTRA3|Prsp|Tasp|-|4p16.1|protein-coding	3	94031
HERC2P9|-|-|15q13.1|pseudo	3	440248
LOC400927|-|-|22q13.1|pseudo	3	400927
CRIPAK|-|-|4p16.3|protein-coding	3	285464
SH2D3C|CHAT|NSP3|PRO34088|SHEP1|-|9q34.11|protein-coding	3	10044
RNASE6|RAD1|RNS6|RNasek6|-|14q11.2|protein-coding	3	6039
TAOK2|MAP3K17|PSK|PSK1|PSK1-BETA|TAO1|TAO2|-|16p11.2|protein-coding	3	9344
USP31|-|-|16p12.2|protein-coding	3	57478
PILRB|FDFACT1|FDFACT2|-|7q22.1|protein-coding	3	29990
HLX|HB24|HLX1|-|1q41|protein-coding	3	3142
FAM43A|-|-|3q29|protein-coding	3	131583
HIVEP1|CIRIP|CRYBP1|GAAP|MBP-1|PRDII-BF1|Schnurri-1|ZAS1|ZNF40|ZNF40A|-|6p24.1|protein-coding	3	3096
RAPGEF4|CAMP-GEFII|CGEF2|EPAC|EPAC 2|EPAC2|Nbla00496|-|2q31.1|protein-coding	3	11069
TNFAIP8L1|TIPE1|-|19p13.3|protein-coding	3	126282
ABCD4|ABC41|EST352188|MAHCJ|P70R|P79R|PMP69|PXMP1L|-|14q24.3|protein-coding	3	5826
MESDC1|-|-|15q25.1|protein-coding	3	59274
MARC2|MOSC2|-|1q41|protein-coding	3	54996
MID2|FXY2|MRX101|RNF60|TRIM1|-|Xq22.3|protein-coding	3	11043
SLC5A4|DJ90G24.4|SAAT1|SGLT3|-|22q12.3|protein-coding	3	6527
MANSC1|9130403P13Rik|LOH12CR3|-|12p13.2|protein-coding	3	54682
PTGER4P2-CDK2AP2P2|-|-|9q13|pseudo	3	442421
IQCA1|4930465P12Rik|DRC11|IQCA|-|2q37.2-q37.3|protein-coding	3	79781
LINC01013|-|-|6q23.2|ncRNA	3	100507254
LOC101928370|-|-|1p21.2|ncRNA	3	101928370
SLC16A11|MCT11|-|17p13.1|protein-coding	3	162515
KRTCAP3|KCP3|-|2p23.3|protein-coding	3	200634
LMBR1L|LIMR|-|12q13.12|protein-coding	3	55716
MDFI|I-MF|I-mfa|-|6p21.1|protein-coding	3	4188
EDA|ECTD1|ED1|ED1-A1|ED1-A2|EDA-A1|EDA-A2|EDA1|EDA2|HED|HED1|ODT1|STHAGX1|TNLG7C|XHED|XLHED|-|Xq13.1|protein-coding	3	1896
CACNG6|-|-|19q13.42|protein-coding	3	59285
RGL2|HKE1.5|KE1.5|RAB2L|-|6p21.32|protein-coding	3	5863
PKHD1L1|PKHDL1|-|8q23.1-q23.2|protein-coding	3	93035
ANKRD55|-|-|5q11.2|protein-coding	3	79722
PTPRN2|IA-2beta|IAR|ICAAR|PTPRP|R-PTP-N2|-|7q36.3|protein-coding	3	5799
BCHE|CHE1|CHE2|E1|-|3q26.1|protein-coding	3	590
CMTM8|CKLFSF8|CKLFSF8-V2|-|3p22.3|protein-coding	3	152189
PTPRE|HPTPE|PTPE|R-PTP-EPSILON|-|10q26.2|protein-coding	3	5791
LEFTY2|EBAF|LEFTA|LEFTYA|TGFB4|-|1q42.12|protein-coding	3	7044
SLC16A14|MCT14|-|2q36.3|protein-coding	3	151473
ADARB2|ADAR3|RED2|-|10p15.3|protein-coding	3	105
LOC100130298|-|-|8q12.2|ncRNA	3	100130298
PIEZO2|C18orf30|C18orf58|DA3|DA5|DAIPT|FAM38B|FAM38B2|HsT748|HsT771|MWKS|-|18p11.22-p11.21|protein-coding	3	63895
CD53|MOX44|TSPAN25|-|1p13.3|protein-coding	3	963
OSBPL7|ORP7|-|17q21.32|protein-coding	3	114881
LTB|TNFC|TNFSF3|TNLG1C|p33|-|6p21.33|protein-coding	3	4050
EEF2K|HSU93850|eEF-2K|-|16p12.2|protein-coding	3	29904
TSPEAR|C21orf29|DFNB98|TSP-EAR|-|21q22.3|protein-coding	3	54084
ELMO1|CED-12|CED12|ELMO-1|-|7p14.2-p14.1|protein-coding	3	9844
ITPKB|IP3-3KB|IP3K|IP3K-B|IP3KB|PIG37|-|1q42.12|protein-coding	3	3707
BMF|-|-|15q15.1|protein-coding	3	90427
ALOX5|5-LO|5-LOX|5LPG|LOG5|-|10q11.21|protein-coding	3	240
KSR1|KSR|RSU2|-|17q11.2|protein-coding	3	8844
EYA1|BOP|BOR|BOS1|OFC1|-|8q13.3|protein-coding	3	2138
AGRN|CMS8|CMSPPD|-|1p36.33|protein-coding	3	375790
CTSH|ACC-4|ACC-5|ACC4|ACC5|CPSB|-|15q25.1|protein-coding	3	1512
LAMB4|-|-|7q31.1|protein-coding	3	22798
SLC26A9|-|-|1q32.1|protein-coding	3	115019
SGSM1|RUTBC2|-|22q11.23|protein-coding	3	129049
LOC100507002|-|-|17q24.1|ncRNA	3	100507002
ZBTB18|C2H2-171|MRD22|RP58|TAZ-1|ZNF238|-|1q44|protein-coding	3	10472
LIMCH1|LIMCH1A|LMO7B|-|4p13|protein-coding	3	22998
ABCA3|ABC-C|ABC3|EST111653|LBM180|SMDP3|-|16p13.3|protein-coding	3	21
SIRPA|BIT|CD172A|MFR|MYD-1|P84|PTPNS1|SHPS1|SIRP|-|20p13|protein-coding	3	140885
CCRL2|ACKR5|CKRX|CRAM|CRAM-A|CRAM-B|HCR|-|3p21.31|protein-coding	3	9034
CCL16|CKb12|HCC-4|ILINCK|LCC-1|LEC|LMC|Mtn-1|NCC-4|NCC4|SCYA16|SCYL4|-|17q12|protein-coding	3	6360
DMTN|DMT|EPB49|-|8p21.3|protein-coding	3	2039
ALDH1A3|ALDH1A6|ALDH6|MCOP8|RALDH3|-|15q26.3|protein-coding	3	220
SP6|EPFN|EPIPROFIN|KLF14|-|17q21.32|protein-coding	3	80320
ADAMTS4|ADAMTS-2|ADAMTS-4|ADMP-1|-|1q23.3|protein-coding	3	9507
CCNA1|CT146|-|13q13.3|protein-coding	3	8900
BMX|ETK|PSCTK2|PSCTK3|-|Xp22.2|protein-coding	3	660
PARP15|ARTD7|BAL3|pART7|-|3q21.1|protein-coding	3	165631
TNFRSF14|ATAR|CD270|HVEA|HVEM|LIGHTR|TR2|-|1p36.32|protein-coding	3	8764
SEMA3G|sem2|-|3p21.1|protein-coding	3	56920
NXPH3|NPH3|-|17q21.33|protein-coding	3	11248
SPATA6L|C9orf68|bA6J24.2|-|9p24.2-p24.1|protein-coding	3	55064
ZSCAN31|ZNF20-Lp|ZNF310P|ZNF323|-|6p22.1|6p22.3-p22.1|protein-coding	3	64288
ETS2|ETS2IT1|-|21q22.2|protein-coding	3	2114
LOC101930370|-|-|4q34.1|ncRNA	3	101930370
GGTA1P|GGTA|GGTA1|GLYT2|a1/3GTP|-|9q33.2|pseudo	3	2681
PARD6A|PAR-6A|PAR6|PAR6C|PAR6alpha|TAX40|TIP-40|-|16q22.1|protein-coding	3	50855
CASC18|-|-|12q23.3|ncRNA	3	101929110
RSAD2|2510004L01Rik|cig33|cig5|vig1|-|2p25.2|protein-coding	3	91543
FILIP1|FILIP|-|6q14.1|protein-coding	3	27145
TMEM140|-|-|7q33|protein-coding	3	55281
CERS1|EPM8|LAG1|LASS1|UOG1|-|19p13.11|protein-coding	3	10715
RGPD1|RGP1|RGPD2|RanBP2L2|-|2p11.2|protein-coding	3	400966
HDGFL1|PWWP1|dJ309H15.1|-|6p22.3|protein-coding	3	154150
BEND7|C10orf30|-|10p13|protein-coding	3	222389
LINC01410|-|-|9q13|ncRNA	3	103352539
PRAG1|NACK|PEAK2|PRAGMIN|SGK223|-|8p23.1|protein-coding	3	157285
PGF|D12S1900|PGFL|PIGF|PLGF|PlGF-2|SHGC-10760|-|14q24.3|protein-coding	3	5228
CRIP2|CRIP|CRP2|ESP1|-|14q32.33|protein-coding	3	1397
INPP5D|SHIP|SHIP-1|SHIP1|SIP-145|hp51CN|p150Ship|-|2q37.1|protein-coding	3	3635
LINC00176|NCRNA00176|PRR17|-|20q13.33|protein-coding	3	284739
RHPN1|ODF5|RHOPHILIN|RHPN|-|8q24.3|protein-coding	3	114822
SULF2|HSULF-2|-|20q13.12|protein-coding	3	55959
KLHL14|-|-|18q12.1|protein-coding	3	57565
C2CD4B|FAM148B|NLF2|-|15q22.2|protein-coding	3	388125
SNCB|-|-|5q35.2|protein-coding	3	6620
GCNT2|CCAT|CTRCT13|GCNT2C|GCNT5|IGNT|II|NACGT1|NAGCT1|ULG3|bA360O19.2|bA421M1.1|-|6p24.3-p24.2|protein-coding	3	2651
RHOJ|ARHJ|RASL7B|TC10B|TCL|-|14q23.2|protein-coding	3	57381
SPTBN1|ELF|HEL102|SPTB2|betaSpII|-|2p16.2|protein-coding	3	6711
STAG3L5P-PVRIG2P-PILRB|LOC101735302-LOC101752334-PILRB|-|7q22.1|ncRNA	3	101752399
KIAA1551|C12orf35|UTA2-1|-|12p11.21|protein-coding	3	55196
LIMS3-LOC440895|-|-|2q13|ncRNA	3	100271835
RAPGEF1|C3G|GRF2|-|9q34.13|protein-coding	3	2889
LOC728715|-|-|12p13.31|ncRNA	3	728715
AIF1L|C9orf58|IBA2|-|9q34.12-q34.13|protein-coding	3	83543
SERTAD4-AS1|C1orf133|-|1q32.2|ncRNA	3	574036
ALDH2|ALDH-E2|ALDHI|ALDM|-|12q24.12|protein-coding	3	217
ATF7IP2|MCAF2|-|16p13.2-p13.13|protein-coding	3	80063
ANKRD36BP2|-|-|2p11.2|pseudo	3	645784
SH3BP5|SAB|SH3BP-5|-|3p25.1|protein-coding	3	9467
FNDC5|FRCP2|irisin|-|1p35.1|protein-coding	3	252995
FAM124B|-|-|2q36.2|protein-coding	3	79843
SFMBT2|-|-|10p14|protein-coding	3	57713
POMC|ACTH|CLIP|LPH|MSH|NPP|POC|-|2p23.3|protein-coding	3	5443
SIRPB2|PTPN1L|PTPNS1L3|dJ776F14.2|-|20p13|protein-coding	3	284759
TMOD1|D9S57E|ETMOD|TMOD|-|9q22.33|protein-coding	3	7111
CD200|MOX1|MOX2|MRC|OX-2|-|3q13.2|protein-coding	3	4345
LINC00840|-|-|10q11.21|ncRNA	3	100506835
RFK|RIFK|-|9q21.13|protein-coding	3	55312
GRM2|GLUR2|GPRC1B|MGLUR2|mGlu2|-|3p21.2|protein-coding	3	2912
ACSS1|ACAS2L|ACECS1|AceCS2L|-|20p11.21|protein-coding	3	84532
PRKCQ|PRKCT|nPKC-theta|-|10p15.1|protein-coding	3	5588
FXYD2|ATP1G1|HOMG2|-|11q23.3|protein-coding	3	486
C1orf162|-|-|1p13.2|protein-coding	3	128346
HOXD1|HOX4|HOX4G|Hox-4.7|-|2q31.1|protein-coding	3	3231
EPHB4|HTK|MYK1|TYRO11|-|7q22.1|protein-coding	3	2050
TCP11L2|-|-|12q23.3|protein-coding	3	255394
PALMD|C1orf11|PALML|-|1p21.2|protein-coding	3	54873
LDLRAD2|-|-|1p36.12|protein-coding	3	401944
ABCG1|ABC8|WHITE1|-|21q22.3|protein-coding	3	9619
DPEP1|MBD1|MDP|RDP|-|16q24.3|protein-coding	3	1800
PLCB1|EIEE12|PI-PLC|PLC-154|PLC-I|PLC-beta-1|PLC154|PLCB1A|PLCB1B|-|20p12.3|protein-coding	3	23236
RRN3P2|-|-|16p11.2|pseudo	3	653390
HLA-B|AS|B-4901|HLAB|-|6p21.33|protein-coding	3	3106
PCDHB12|PCDH-BETA12|-|5q31.3|protein-coding	3	56124
SNCA|NACP|PARK1|PARK4|PD1|-|4q22.1|protein-coding	3	6622
RNF44|-|-|5q35.2|protein-coding	3	22838
CREM|CREM-2|ICER|hCREM-2|-|10p11.21|protein-coding	3	1390
LAMA3|BM600|E170|LAMNA|LOCS|-|18q11.2|protein-coding	3	3909
HCG9|HCGIX|HCGIX4|-|6p22.1|ncRNA	3	10255
CEACAM19|CEACM19|CEAL1|-|19q13.31|protein-coding	3	56971
NOS1AP|6330408P19Rik|CAPON|-|1q23.3|protein-coding	3	9722
DBNDD1|-|-|16q24.3|protein-coding	3	79007
CACNB3|CAB3|CACNLB3|-|12q13.12|protein-coding	3	784
SPRY1|hSPRY1|-|4q28.1|protein-coding	3	10252
MPZL2|EVA|EVA1|-|11q23.3|protein-coding	3	10205
RGS3|C2PA|RGP3|-|9q32|protein-coding	3	5998
MIXL1|MILD1|MIX|MIXL|-|1q42.12|protein-coding	3	83881
SIPA1|SPA1|-|11q13.1|protein-coding	3	6494
PLEKHG1|ARHGEF41|-|6q25.1|protein-coding	3	57480
GATS|STAG3OS|-|7q22.1|protein-coding	3	352954
SSPO|-|-|7q36.1|protein-coding	3	23145
MSR1|CD204|SCARA1|SR-A|SRA|phSR1|phSR2|-|8p22|protein-coding	3	4481
MCAM|CD146|MUC18|-|11q23.3|protein-coding	3	4162
MMRN2|EMILIN-3|EMILIN3|ENDOGLYX-1|-|10q23.2|protein-coding	3	79812
SLC24A4|AI2A5|NCKX4|SHEP6|SLC24A2|-|14q32.12|protein-coding	3	123041
GPRIN3|GRIN3|-|4q22.1|protein-coding	3	285513
ADAMTS7|ADAM-TS 7|ADAM-TS7|ADAMTS-7|-|15q25.1|protein-coding	3	11173
KANK3|ANKRD47|-|19p13.2|protein-coding	3	256949
PPP1R13B|ASPP1|p53BP2-like|p85|-|14q32.33|protein-coding	3	23368
DYSF|FER1L1|LGMD2B|MMD1|-|2p13.2|protein-coding	3	8291
NOS3|ECNOS|eNOS|-|7q36.1|protein-coding	3	4846
FLJ27354|-|-|1p22.2|ncRNA	3	400761
ARHGEF15|ARGEF15|E5|Ephexin5|Vsm-RhoGEF|-|17p13.1|protein-coding	3	22899
FATE1|CT43|FATE|-|Xq28|protein-coding	3	89885
KLF2|LKLF|-|19p13.11|protein-coding	3	10365
LAMA5|-|-|20q13.33|protein-coding	3	3911
LAMP3|CD208|DC LAMP|DC-LAMP|DCLAMP|LAMP|LAMP-3|TSC403|-|3q27.1|protein-coding	3	27074
AGAP1|AGAP-1|CENTG2|GGAP1|cnt-g2|-|2q37.2|protein-coding	3	116987
ARHGEF7|BETA-PIX|COOL-1|COOL1|Nbla10314|P50|P50BP|P85|P85COOL1|P85SPR|PAK3|PIXB|-|13q34|protein-coding	3	8874
CD300LG|CLM-9|CLM9|NEPMUCIN|TREM-4|TREM4|-|17q21.31|protein-coding	3	146894
PROB1|C5orf65|-|5q31.2|protein-coding	3	389333
NES|Nbla00170|-|1q23.1|protein-coding	3	10763
FRMD4B|6030440G05Rik|GRSP1|-|3p14.1|protein-coding	3	23150
DLL1|DELTA1|DL1|Delta|-|6q27|protein-coding	3	28514
LINC02101|-|-|5q11.2|ncRNA	3	101928569
SOX21-AS1|-|-|13q32.1|ncRNA	3	100507533
CAPN11|calpain11|-|6p21.1|protein-coding	3	11131
RNF144A|RNF144|UBCE7IP4|-|2p25.1|protein-coding	3	9781
SLC22A18AS|BWR1B|BWSCR1B|ORCTL2S|SLC22A1LS|p27-BWR1B|-|11p15.4|protein-coding	3	5003
THSD1|TMTSP|UNQ3010|-|13q14.3|protein-coding	3	55901
SLC27A3|ACSVL3|FATP3|VLCS-3|-|1q21.3|protein-coding	3	11000
FAM189A2|C9orf61|X123|-|9q21.12|protein-coding	3	9413
TMEM217|C6orf128|dJ355M6.2|-|6p21.2|protein-coding	3	221468
SOX18|HLTRS|HLTS|-|20q13.33|protein-coding	3	54345
RIN3|-|-|14q32.12|protein-coding	3	79890
ZNF71|EZFIT|-|19q13.43|protein-coding	3	58491
SYT11|SYT12|sytXI|-|1q22|protein-coding	3	23208
SIPA1L2|SPAL2|-|1q42.2|protein-coding	3	57568
DOCK9-AS2|-|-|13q32.3|ncRNA	3	100861541
TSPAN2|NET3|TSN2|TSPAN-2|-|1p13.2|protein-coding	3	10100
RMND5B|GID2|GID2B|-|5q35.3|protein-coding	3	64777
KIAA1671|-|-|22q11.23|protein-coding	3	85379
CCNJL|-|-|5q33.3|protein-coding	3	79616
FGF16|FGF-16|MF4|-|Xq21.1|protein-coding	3	8823
PDLIM3|ALP|-|4q35.1|protein-coding	3	27295
APOL4|APOL-IV|APOLIV|-|22q12.3|protein-coding	3	80832
APOL3|APOLIII|CG121|CG12_1|apoL-III|-|22q12.3|protein-coding	3	80833
CCL14|CC-1|CC-3|CKB1|HCC-1|HCC-1(1-74)|HCC-1/HCC-3|HCC-3|MCIF|NCC-2|NCC2|SCYA14|SCYL2|SY14|-|17q12|protein-coding	3	6358
AK7|AK 7|-|14q32.2|protein-coding	3	122481
FXYD6-FXYD2|-|-|11q23.3|protein-coding	3	100533181
SSH2|SSH-2|SSH-2L|-|17q11.2|protein-coding	3	85464
PHOSPHO2-KLHL23|-|-|2q31.1|protein-coding	3	100526832
KIAA1147|LCHN|PRO2561|-|7q34|protein-coding	3	57189
LRG1|HMFT1766|LRG|-|19p13.3|protein-coding	3	116844
NEURL1B|NEURL3|hNeur2|neur2|-|5q35.1|protein-coding	3	54492
SPOCK2|testican-2|-|10q22.1|protein-coding	3	9806
FBLIM1|CAL|FBLP-1|FBLP1|-|1p36.21|protein-coding	3	54751
CORO7|0610011B16Rik|CRN7|POD1|-|16p13.3|protein-coding	3	79585
MS4A6A|4SPAN3|4SPAN3.2|CD20L3|CDA01|MS4A6|MST090|MSTP090|-|11q12.2|protein-coding	3	64231
GABRP|-|-|5q35.1|protein-coding	3	2568
SHE|-|-|1q21.3|protein-coding	3	126669
KCNF1|IK8|KCNF|KV5.1|kH1|-|2p25.1|protein-coding	3	3754
ABLIM1|ABLIM|LIMAB1|LIMATIN|abLIM-1|-|10q25.3|protein-coding	3	3983
ABCA4|ABC10|ABCR|ARMD2|CORD3|FFM|RMP|RP19|STGD|STGD1|-|1p22.1|protein-coding	3	24
CCL21|6Ckine|CKb9|ECL|SCYA21|SLC|TCA4|-|9p13.3|protein-coding	3	6366
CCDC163|C1orf231|CCDC163P|-|1p34.1|pseudo	3	126661
SCNN1B|BESC1|ENaCb|ENaCbeta|SCNEB|-|16p12.2|protein-coding	3	6338
ZNF792|-|-|19q13.11|protein-coding	3	126375
CIDEB|-|-|14q12|protein-coding	3	27141
SCN5A|CDCD2|CMD1E|CMPD2|HB1|HB2|HBBD|HH1|ICCD|IVF|LQT3|Nav1.5|PFHB1|SSS1|VF1|-|3p22.2|protein-coding	3	6331
KLHL3|PHA2D|-|5q31.2|protein-coding	3	26249
MOV10L1|CHAMP|DJ402G11.8|-|22q13.33|protein-coding	3	54456
HES1|HES-1|HHL|HRY|bHLHb39|-|3q29|protein-coding	3	3280
LOC100506178|-|-|7p15.3|ncRNA	3	100506178
KIAA1257|-|-|3q21.3|protein-coding	3	57501
CMPK2|NDK|TMPK2|TYKi|UMP-CMPK2|-|2p25.2|protein-coding	3	129607
CHN2|ARHGAP3|BCH|CHN2-3|RHOGAP3|-|7p14.3|protein-coding	3	1124
FGF13|FGF-13|FGF2|FHF-2|FHF2|-|Xq26.3-q27.1|protein-coding	3	2258
VWF|F8VWF|VWD|-|12p13.31|protein-coding	3	7450
C8orf4|TC-1|TC1|-|8p11.21|protein-coding	3	56892
LIMS2|LGMD2W|PINCH-2|PINCH2|-|2q14.3|protein-coding	3	55679
FRY|13CDNA73|214K23.2|C13orf14|CG003|bA207N4.2|bA37E23.1|-|13q13.1|protein-coding	3	10129
IPCEF1|PIP3-E|-|6q25.2|protein-coding	3	26034
RPH3AL|NOC2|-|17p13.3|protein-coding	3	9501
SNN|-|-|16p13.13|protein-coding	3	8303
PVRIG2P|-|-|7q22.1|pseudo	3	101752334
CCDC85A|-|-|2p16.1|protein-coding	3	114800
ABHD6|-|-|3p14.3|protein-coding	3	57406
USP6NL|RNTRE|TRE2NL|USP6NL-IT1|-|10p14|protein-coding	3	9712
RSU1P2|-|-|10q11.21|pseudo	3	100133308
NEK3|HSPK36|-|13q14.3|protein-coding	3	4752
EDNRB|ABCDS|ET-B|ET-BR|ETB|ETB1|ETBR|ETRB|HSCR|HSCR2|WS4A|-|13q22.3|protein-coding	3	1910
SOX17|VUR3|-|8q11.23|protein-coding	3	64321
KCNQ3|BFNC2|EBN2|KV7.3|-|8q24.22|protein-coding	3	3786
ZNF235|ANF270|HZF6|ZFP93|ZNF270|-|19q13.31|protein-coding	3	9310
LOC100129434|-|-|2p16.1|ncRNA	3	100129434
FIGNL2|-|-|12q13.13|protein-coding	3	401720
PIK3C2B|C2-PI3K|-|1q32.1|protein-coding	3	5287
SDR42E1|HSPC105|-|16q23.3|protein-coding	3	93517
ARHGAP27P1|-|-|17q24.1|pseudo	3	146880
ACE|ACE1|CD143|DCP|DCP1|-|17q23.3|protein-coding	3	1636
OAS1|E18/E16|IFI-4|OIAS|OIASI|-|12q24.13|protein-coding	3	4938
ADAMTSL3|ADAMTSL-3|-|15q25.2|protein-coding	3	57188
CREG2|-|-|2q11.2|protein-coding	3	200407
STAB1|CLEVER-1|FEEL-1|FELE-1|FEX1|SCARH2|STAB-1|-|3p21.1|protein-coding	3	23166
PDE6G|PDEG|RP57|-|17q25.3|protein-coding	3	5148
CTC1|AAF-132|AAF132|C17orf68|CRMCC|tmp494178|-|17p13.1|protein-coding	3	80169
FERMT3|KIND3|MIG-2|MIG2B|UNC112C|URP2|URP2SF|-|11q13.1|protein-coding	3	83706
IRF8|H-ICSBP|ICSBP|ICSBP1|IMD32A|IMD32B|IRF-8|-|16q24.1|protein-coding	3	3394
CPAMD8|K-CAP|VIP|-|19p13.11|protein-coding	3	27151
HLA-G|MHC-G|-|6p22.1|protein-coding	3	3135
REL|C-Rel|-|2p16.1|protein-coding	3	5966
HMCN2|-|-|9q34.11|protein-coding	3	256158
LOC101927040|-|-|8q21.13|ncRNA	3	101927040
LY6G5C|C6orf20|G5C|LY6G5CA|LY6G5CB|NG33|-|6p21.33|protein-coding	3	80741
CBX2|CDCA6|M33|SRXY5|-|17q25.3|protein-coding	3	84733
LINC01268|-|-|6q21|ncRNA	3	285758
LOC101928058|-|-|8p23.3|ncRNA	3	101928058
RELL1|-|-|4p14|protein-coding	3	768211
B4GALT5|B4Gal-T5|BETA4-GALT-IV|beta4Gal-T5|beta4GalT-V|gt-V|-|20q13.13|protein-coding	3	9334
TSPAN15|2700063A19Rik|NET-7|NET7|TM4SF15|-|10q22.1|protein-coding	3	23555
KLHL4|DKELCHL|KHL4|-|Xq21.31|protein-coding	3	56062
SLCO2B1|OATP-B|OATP2B1|OATPB|SLC21A9|-|11q13.4|protein-coding	3	11309
SULT1C4|SULT1C|SULT1C2|-|2q12.3|protein-coding	3	27233
STX11|FHL4|HLH4|HPLH4|-|6q24.2|protein-coding	3	8676
ANGEL1|Ccr4e|KIAA0759|-|14q24.3|protein-coding	3	23357
TMPRSS5|SPINESIN|-|11q23.2|protein-coding	3	80975
ARRB1|ARB1|ARR1|-|11q13.4|protein-coding	3	408
HID1-AS1|-|-|17q25.1|ncRNA	3	102723641
ANO2|C12orf3|TMEM16B|-|12p13.31|protein-coding	3	57101
C15orf62|-|-|15q15.1|protein-coding	3	643338
PTPN7|BPTP-4|HEPTP|LC-PTP|LPTP|PTPNI|-|1q32.1|protein-coding	3	5778
ICAM1|BB2|CD54|P3.58|-|19p13.2|protein-coding	3	3383
PDZD2|AIPC|PAPIN|PDZK3|PIN1|-|5p13.3|protein-coding	3	23037
DACH1|DACH|-|13q21.33|protein-coding	3	1602
DOC2B|DOC2BL|-|17p13.3|protein-coding	3	8447
RNASE1|RAC1|RIB1|RNS1|-|14q11.2|protein-coding	3	6035
PPP1R16B|ANKRD4|TIMAP|-|20q11.23|protein-coding	3	26051
SYNGR2|-|-|17q25.3|protein-coding	3	9144
CYP26A1|CP26|CYP26|P450RAI|P450RAI1|-|10q23.33|protein-coding	3	1592
MYRIP|SLAC2-C|SLAC2C|-|3p22.1|protein-coding	3	25924
ITM2A|BRICD2A|E25A|-|Xq21.1|protein-coding	3	9452
KLHDC8B|CHL|-|3p21.31|protein-coding	3	200942
PRG2|BMPG|MBP|MBP1|proMBP|-|11q12.1|protein-coding	3	5553
NOX4|KOX|KOX-1|RENOX|-|11q14.3|protein-coding	3	50507
HSPA12B|C20orf60|-|20p13|protein-coding	3	116835
NINJ1|NIN1|NINJURIN|-|9q22.31|protein-coding	3	4814
LINC01235|-|-|9p23|ncRNA	3	401492
SYNPO|-|-|5q33.1|protein-coding	3	11346
MIR7704|hsa-mir-7704|-|2q31.1|ncRNA	3	102465802
MARC1|MOSC1|-|1q41|protein-coding	3	64757
CECR1|ADA2|ADGF|IDGFL|PAN|SNEDS|-|22q11.1|protein-coding	3	51816
LAMC2|B2T|BM600|CSF|EBR2|EBR2A|LAMB2T|LAMNB2|-|1q25.3|protein-coding	3	3918
PRKX|PKX1|-|Xp22.33|protein-coding	3	5613
YPEL1|FKSG3|-|22q11.21-q11.22|protein-coding	3	29799
LOXHD1|DFNB77|LH2D1|-|18q21.1|protein-coding	3	125336
ANXA2R|AX2R|AXIIR|C5orf39|-|5p12|protein-coding	3	389289
LOC389765|-|-|9q21.33|pseudo	3	389765
ARHGAP4|C1|RGC1|RhoGAP4|SrGAP4|p115|-|Xq28|protein-coding	3	393
KIF26A|-|-|14q32.33|protein-coding	3	26153
PLEKHO2|PLEKHQ1|PP1628|pp9099|-|15q22.31|protein-coding	3	80301
ICA1|ICA69|ICAp69|-|7p21.3|protein-coding	3	3382
F2RL3|PAR4|-|19p13.11|protein-coding	3	9002
DGKD|DGKdelta|dgkd-2|-|2q37.1|protein-coding	3	8527
LRRTM2|-|-|5q31.2|protein-coding	3	26045
CGNL1|JACOP|PCING|-|15q21.3|protein-coding	3	84952
RAMP2|-|-|17q21.2|protein-coding	3	10266
DOK3|DOKL|-|5q35.3|protein-coding	3	79930
CXCR4|CD184|D2S201E|FB22|HM89|HSY3RR|LAP-3|LAP3|LCR1|LESTR|NPY3R|NPYR|NPYRL|NPYY3R|WHIM|WHIMS|-|2q22.1|protein-coding	3	7852
CRYBB3|CATCN2|CRYB3|CTRCT22|-|22q11.23|protein-coding	3	1417
KIAA1211L|C2orf55|-|2q11.2|protein-coding	3	343990
TBX1|CAFS|CATCH22|CTHM|DGCR|DGS|DORV|TBX1C|TGA|VCF|VCFS|-|22q11.21|protein-coding	3	6899
TNNT2|CMD1D|CMH2|CMPD2|LVNC6|RCM3|TnTC|cTnT|-|1q32.1|protein-coding	3	7139
FUT1|H|HH|HSC|-|19q13.33|protein-coding	3	2523
SYCE1L|MRP2|-|16q23.1|protein-coding	3	100130958
TSNAX-DISC1|-|-|1q42.2|ncRNA	3	100303453
CLEC4F|CLECSF13|KCLR|-|2p13.3|protein-coding	3	165530
PLCG2|APLAID|FCAS3|PLC-IV|PLC-gamma-2|-|16q23.3|protein-coding	3	5336
FOXO1|FKH1|FKHR|FOXO1A|-|13q14.11|protein-coding	3	2308
RAPGEF2|CNrasGEF|NRAPGEP|PDZ-GEF1|PDZGEF1|RA-GEF|RA-GEF-1|Rap-GEP|nRap GEP|-|4q32.1|protein-coding	3	9693
LOC100506603|-|-|14q24.3|ncRNA	3	100506603
FUCA1|FUCA|-|1p36.11|protein-coding	3	2517
SLC22A23|C6orf85|-|6p25.2|protein-coding	3	63027
LRRC55|-|-|11q12.1|protein-coding	3	219527
AGAP7P|AGAP-7|AGAP7|CTGLF4|bA109G10.1|-|10q11.22|pseudo	3	653268
GRASP|TAMALIN|-|12q13.13|protein-coding	3	160622
CA2|CA-II|CAC|CAII|Car2|HEL-76|HEL-S-282|-|8q21.2|protein-coding	3	760
NLRP12|CLR19.3|FCAS2|NALP12|PAN6|PYPAF7|RNO|RNO2|-|19q13.42|protein-coding	3	91662
CACNG7|-|-|19q13.42|protein-coding	3	59284
ST8SIA4|PST|PST1|SIAT8D|ST8SIA-IV|-|5q21.1|protein-coding	3	7903
LOC101927181|-|-|7p22.3|ncRNA	3	101927181
B3GNT7|beta3GnT7|-|2q37.1|2q37.1|protein-coding	3	93010
MTUS1|ATBP|ATIP|ICIS|MP44|MTSG1|-|8p22|protein-coding	3	57509
KLHL23|DITHP|-|2q31.1|protein-coding	3	151230
JAG2|HJ2|SER2|-|14q32.33|protein-coding	3	3714
MFSD4A|MFSD4|UNQ3064|-|1q32.1|protein-coding	3	148808
SPTA1|EL2|HPP|HS3|SPH3|SPTA|-|1q23.1|protein-coding	3	6708
VWA5B2|-|-|3q27.1|protein-coding	3	90113
RGS12|-|-|4p16.3|protein-coding	3	6002
SAMD10|C20orf136|dJ591C20|dJ591C20.7|-|20q13.33|protein-coding	3	140700
FAM171A2|-|-|17q21.31|protein-coding	3	284069
MGAT4A|GNT-IV|GNT-IVA|GnT-4a|-|2q11.2|protein-coding	3	11320
KRT42P|-|-|17q21.2|pseudo	3	284116
DOCK6|AOS2|ZIR1|-|19p13.2|protein-coding	3	57572
GFOD1|ADG-90|C6orf114|-|6p24.1-p23|protein-coding	3	54438
TIE1|JTK14|TIE|-|1p34.2|protein-coding	3	7075
MIR6756|hsa-mir-6756|-|11q23.3|ncRNA	3	102465453
SCAMP5|-|-|15q24.2|protein-coding	3	192683
RPSAP9|LAMR1P9|RPSA_20_986|-|9q21.13|pseudo	3	653162
HOXA2|HOX1K|MCOHI|-|7p15.2|protein-coding	3	3199
NHLRC4|-|-|16p13.3|protein-coding	3	283948
SH3BGRL2|-|-|6q14.1|protein-coding	3	83699
CA13|CAXIII|-|8q21.2|protein-coding	3	377677
TMEM88|-|-|17p13.1|protein-coding	3	92162
IQCJ-SCHIP1|-|-|3q25.32-q25.33|protein-coding	3	100505385
RNF125|TNORS|TRAC-1|TRAC1|-|18q12.1|protein-coding	3	54941
SLC8A3|NCX3|-|14q24.2|protein-coding	3	6547
ABCA9-AS1|-|-|17q24.2|ncRNA	3	104355297
ZNF815P|ZNF815|-|7p22.1|pseudo	3	401303
PZP|CPAMD6|-|12p13.31|protein-coding	3	5858
CLDN14|DFNB29|-|21q22.13|protein-coding	3	23562
GRB10|GRB-IR|Grb-10|IRBP|MEG1|RSS|-|7p12.1|protein-coding	3	2887
STK32B|HSA250839|STK32|STKG6|YANK2|-|4p16.2|protein-coding	3	55351
PCDH17|PCDH68|PCH68|-|13q21.1|protein-coding	3	27253
BACE2|AEPLC|ALP56|ASP1|ASP21|BAE2|CDA13|CEAP1|DRAP|-|21q22.2-q22.3|protein-coding	3	25825
PLLP|PMLP|TM4SF11|-|16q13|protein-coding	3	51090
INHBB|-|-|2q14.2|protein-coding	3	3625
CPLX1|CPX-I|CPX1|-|4p16.3|protein-coding	3	10815
CASP12|CASP-12|CASP12P1|-|11q22.3|protein-coding	3	100506742
NOL4L|C20orf112|C20orf113|dJ1184F4.2|dJ1184F4.4|-|20q11.21|protein-coding	3	140688
MMP28|EPILYSIN|MM28|MMP-25|MMP-28|MMP25|-|17q12|protein-coding	3	79148
LMNTD2|C11orf35|-|11p15.5|protein-coding	3	256329
KU-MEL-3|-|-|6p25.1|ncRNA	3	497048
TTC13|-|-|1q42.2|protein-coding	3	79573
ZNF750|ZFP750|-|17q25.3|protein-coding	3	79755
BCOR|ANOP2|MAA2|MCOPS2|-|Xp11.4|protein-coding	3	54880
CLDN5|AWAL|BEC1|CPETRL1|TMVCF|-|22q11.21|protein-coding	3	7122
ARRDC2|CLONE24945|PP2703|-|19p13.11|protein-coding	3	27106
ZNF467|EZI|Zfp467|-|7q36.1|protein-coding	3	168544
MEF2C|C5DELq14.3|DEL5q14.3|-|5q14.3|protein-coding	3	4208
VWA1|WARP|-|1p36.33|protein-coding	3	64856
CAPNS2|-|-|16q12.2|protein-coding	3	84290
TMCC1|-|-|3q22.1|protein-coding	3	23023
MYO5C|-|-|15q21.2|protein-coding	3	55930
SLC4A11|BTR1|CDPD1|CHED|CHED2|NABC1|dJ794I6.2|-|20p13|protein-coding	3	83959
GCHFR|GFRP|HsT16933|P35|-|15q15.1|protein-coding	3	2644
GGT1|CD224|D22S672|D22S732|GGT|GGT 1|GTG|-|22q11.23|protein-coding	3	2678
EPHA5|CEK7|EHK-1|EHK1|EK7|HEK7|TYRO4|-|4q13.1-q13.2|protein-coding	3	2044
EFCAB14|KIAA0494|-|1p33|protein-coding	3	9813
FAM214A|KIAA1370|-|15q21.2-q21.3|protein-coding	3	56204
SPTBN2|GTRAP41|SCA5|SCAR14|-|11q13.2|protein-coding	3	6712
TMEM132A|GBP|HSPA5BP1|-|11q12.2|protein-coding	3	54972
RPPH1|H1RNA|RPPH1-1|-|14q11.2|ncRNA	3	85495
COBL|-|-|7p12.1|protein-coding	3	23242
ASGR1|ASGPR|ASGPR1|CLEC4H1|HL-1|-|17p13.1|protein-coding	3	432
PRICKLE4|C6orf49|OBTP|OEBT|TOMM6|-|6p21.1|protein-coding	3	29964
MCF2L2|ARHGEF22|-|3q27.1|protein-coding	3	23101
PCLO|ACZ|PCH3|-|7q21.11|protein-coding	3	27445
PAQR8|C6orf33|LMPB1|MPRB|-|6p12.2|protein-coding	3	85315
CHST5|I-GlcNAc-6-ST|I-GlcNAc6ST|glcNAc6ST-3|gn6st-3|hIGn6ST|-|16q23.1|protein-coding	3	23563
TBC1D30|-|-|12q14.3|protein-coding	3	23329
RNFT2|TMEM118|-|12q24.22|protein-coding	3	84900
C10orf10|DEPP|FIG|Fseg|-|10q11.21|protein-coding	3	11067
C19orf33|H2RSP|IMUP|IMUP-1|IMUP-2|-|19q13.2|protein-coding	3	64073
CA4|CAIV|Car4|RP17|-|17q23.1|protein-coding	3	762
EPAS1|ECYT4|HIF2A|HLF|MOP2|PASD2|bHLHe73|-|2p21|protein-coding	3	2034
LMO2|RBTN2|RBTNL1|RHOM2|TTG2|-|11p13|protein-coding	3	4005
UNC5A|UNC5H1|-|5q35.2|protein-coding	3	90249
TNRC6C-AS1|-|-|17q25.3|ncRNA	3	100131096
TMEM45B|-|-|11q24.3|protein-coding	3	120224
CD38|ADPRC 1|ADPRC1|-|4p15.32|protein-coding	3	952
TMCC3|-|-|12q22|protein-coding	3	57458
OPRL1|KOR-3|NOCIR|NOP|NOPr|OOR|ORL1|-|20q13.33|protein-coding	3	4987
CATSPERG|C19orf15|-|19q13.2|protein-coding	3	57828
NLRC3|CLR16.2|NOD3|-|16p13.3|protein-coding	3	197358
KCNJ2|ATFB9|HHBIRK1|HHIRK1|IRK1|KIR2.1|LQT7|SQT3|-|17q24.3|protein-coding	3	3759
ESPN|DFNB36|LP2654|-|1p36.31|protein-coding	3	83715
CLEC14A|C14orf27|CEG1|EGFR-5|-|14q21.1|protein-coding	3	161198
NCR1|CD335|LY94|NK-p46|NKP46|-|19q13.42|protein-coding	3	9437
MYO7A|DFNA11|DFNB2|MYOVIIA|MYU7A|NSRD2|USH1B|-|11q13.5|protein-coding	3	4647
STAG3L5P|-|-|7q22.1|pseudo	3	101735302
MIF4GD|AD023|MIFD|SLIP1|-|17q25.1|protein-coding	3	57409
SPNS2|-|-|17p13.2|protein-coding	3	124976
SERPINC1|AT3|AT3D|ATIII|THPH7|-|1q25.1|protein-coding	3	462
RELT|TNFRSF19L|TRLT|-|11q13.4|protein-coding	3	84957
STON2|STN2|STNB|STNB2|-|14q31.1|protein-coding	3	85439
CRACR2B|EFCAB4A|-|11p15.5|protein-coding	3	283229
FREM3|-|-|4q31.21|protein-coding	3	166752
PTCHD1|AUTSX4|-|Xp22.11|protein-coding	3	139411
STAP2|BKS|-|19p13.3|protein-coding	3	55620
LPAR6|ARWH1|HYPT8|LAH3|P2RY5|P2Y5|-|13q14.2|protein-coding	3	10161
CASP10|ALPS2|FLICE2|MCH4|-|2q33.1|protein-coding	3	843
FAM221A|C7orf46|-|7p15.3|protein-coding	3	340277
RP1L1|DCDC4B|-|8p23.1|protein-coding	3	94137
GIT1|-|-|17q11.2|protein-coding	3	28964
SLC25A29|C14orf69|CACL|ORNT3|-|14q32.2|protein-coding	3	123096
CMTM2|CKLFSF2|-|16q21|protein-coding	3	146225
SOX4|EVI16|-|6p22.3|protein-coding	3	6659
GALNT18|GALNACT18|GALNT15|GALNTL4|GalNAc-T15|GalNAc-T18|-|11p15.4|protein-coding	3	374378
PIK3R3|p55|p55-GAMMA|p55PIK|-|1p34.1|protein-coding	3	8503
TRIML2|SPRYD6|-|4q35.2|protein-coding	3	205860
RGS7BP|R7BP|-|5q12.3|protein-coding	3	401190
RAB15|-|-|14q23.3|protein-coding	3	376267
PLEKHA7|-|-|11p15.2-p15.1|protein-coding	3	144100
SLC9A1|APNH|LIKNS|NHE-1|NHE1|PPP1R143|-|1p36.11|protein-coding	3	6548
TCF15|EC2|PARAXIS|bHLHa40|-|20p13|protein-coding	3	6939
KCNN3|KCa2.3|SK3|SKCA3|hSK3|-|1q21.3|protein-coding	3	3782
TINAGL1|ARG1|LCN7|LIECG3|TINAGRP|-|1p35.2|protein-coding	3	64129
TMC1|DFNA36|DFNB11|DFNB7|-|9q21.13|protein-coding	3	117531
EFR3B|KIAA0953|-|2p23.3|protein-coding	3	22979
HOMER3|HOMER-3|VESL3|-|19p13.11|protein-coding	3	9454
NEDD4L|NEDD4-2|NEDD4.2|PVNH7|RSP5|hNEDD4-2|-|18q21.31|protein-coding	3	23327
PKP1|B6P|-|1q32.1|protein-coding	3	5317
TNFAIP2|B94|EXOC3L3|-|14q32.32|protein-coding	3	7127
SEMA6A|HT018|SEMA|SEMA6A1|SEMAQ|VIA|-|5q23.1|protein-coding	3	57556
AGFG2|HRBL|RABR|-|7q22.1|protein-coding	3	3268
ARHGAP27P1-BPTFP1-KPNA2P3|-|-|-|pseudo	3	109286553
EFNA4|EFL4|EPLG4|LERK4|-|1q21.3|protein-coding	3	1945
LRRC1|LANO|dJ523E19.1|-|6p12.1|protein-coding	3	55227
AATK|AATYK|AATYK1|LMR1|LMTK1|PPP1R77|p35BP|-|17q25.3|protein-coding	3	9625
ZBED3|-|-|5q13.3|protein-coding	3	84327
ST8SIA6|SIA8F|SIAT8-F|SIAT8F|ST8SIA-VI|ST8SiaVI|-|10p12.33|protein-coding	3	338596
CCM2L|C20orf160|dJ310O13.5|-|20q11.21|protein-coding	3	140706
PTPRM|PTPRL1|R-PTP-MU|RPTPM|RPTPU|hR-PTPu|-|18p11.23|protein-coding	3	5797
EMCN|EMCN2|MUC14|-|4q24|protein-coding	3	51705
STAB2|FEEL2|FELE-2|FELL2|FEX2|HARE|SCARH1|-|12q23.3|protein-coding	3	55576
FNBP1L|C1orf39|TOCA1|-|1p22.1|protein-coding	3	54874
CXorf36|4930578C19Rik|DIA1R|EPQL1862|PRO3743|bA435K1.1|-|Xp11.3|protein-coding	3	79742
CXADR|CAR|CAR4/6|HCAR|-|21q21.1|protein-coding	3	1525
ADCY4|AC4|-|14q12|protein-coding	3	196883
NOD1|CARD4|CLR7.1|NLRC1|-|7p14.3|protein-coding	3	10392
SEMA3F|SEMA-IV|SEMA4|SEMAK|-|3p21.31|protein-coding	3	6405
SH3BP2|3BP-2|3BP2|CRBM|CRPM|RES4-23|-|4p16.3|protein-coding	3	6452
C1orf226|-|-|1q23.3|protein-coding	3	400793
GDPD5|GDE2|PP1665|-|11q13.4-q13.5|protein-coding	3	81544
CASP7|CASP-7|CMH-1|ICE-LAP3|LICE2|MCH3|-|10q25.3|protein-coding	3	840
ADGRF5|GPR116|KPG_001|-|6p12.3|protein-coding	3	221395
HLA-H|HLAHP|-|6p22.1|pseudo	3	3136
MMRN1|ECM|EMILIN4|GPIa*|MMRN|-|4q22.1|protein-coding	3	22915
MYO15B|MYO15BP|-|17q25.1|protein-coding	3	80022
DDO|DASOX|DDO-1|DDO-2|-|6q21|protein-coding	3	8528
SENCR|FLI1-AS1|lncRNA9|-|11q24.3|ncRNA	3	100507392
HLA-A|HLAA|-|6p22.1|protein-coding	3	3105
PYY2|-|-|17q11.2|pseudo	3	23615
PTPRB|HPTP-BETA|HPTPB|PTPB|R-PTP-BETA|VEPTP|-|12q15|protein-coding	3	5787
HEY2|CHF1|GRIDLOCK|GRL|HERP1|HESR2|HRT2|bHLHb32|-|6q22.31|protein-coding	3	23493
CYTL1|C17|C4orf4|-|4p16.2|protein-coding	3	54360
NPFF|FMRFAL|-|12q13.13|protein-coding	3	8620
TEP1|TLP1|TP1|TROVE1|VAULT2|p240|-|14q11.2|protein-coding	3	7011
DAPK1|DAPK|-|9q21.33|protein-coding	3	1612
PARP12|ARTD12|MST109|MSTP109|ZC3H1|ZC3HDC1|-|7q34|protein-coding	3	64761
TBC1D4|AS160|NIDDM5|-|13q22.2|protein-coding	3	9882
GIPC3|C19orf64|DFNB15|DFNB72|DFNB95|-|19p13.3|protein-coding	3	126326
GAB1|-|-|4q31.21|protein-coding	3	2549
DRC1|C2orf39|CCDC164|CILD21|-|2p23.3|protein-coding	3	92749
RARRES1|LXNL|PERG-1|TIG1|-|3q25.32|protein-coding	3	5918
LINC01451|HCCAT4|-|9q34.3|ncRNA	3	401561
ALS2CL|RN49018|-|3p21.31|protein-coding	3	259173
SLC38A1|ATA1|NAT2|SAT1|SNAT1|-|12q13.11|protein-coding	3	81539
KRT17P5|-|-|17p11.2|pseudo	3	339240
TNFRSF25|APO-3|DDR3|DR3|LARD|TNFRSF12|TR3|TRAMP|WSL-1|WSL-LR|-|1p36.31|protein-coding	3	8718
RASAL3|-|-|19p13.12|protein-coding	3	64926
LDB2|CLIM1|LDB-2|LDB1|-|4p15.32|protein-coding	3	9079
PIWIL3|HIWI3|-|22q11.23|protein-coding	3	440822
PMCH|MCH|ppMCH|-|12q23.2|protein-coding	3	5367
AGER|RAGE|SCARJ1|-|6p21.32|protein-coding	3	177
CFAP54|C12orf55|C12orf63|-|12q23.1|protein-coding	3	144535
KIF17|KIF17B|KIF3X|KLP-2|OSM-3|-|1p36.12|protein-coding	3	57576
LINC00920|-|-|16q21|ncRNA	3	100505865
FLT4|FLT-4|FLT41|LMPH1A|PCL|VEGFR-3|VEGFR3|-|5q35.3|protein-coding	3	2324
HLA-E|HLA-6.2|QA1|-|6p22.1|protein-coding	3	3133
SKAP1|HEL-S-81p|SCAP1|SKAP55|-|17q21.32|protein-coding	3	8631
PXDN|COPOA|D2S448|D2S448E|MG50|PRG2|PXN|VPO|-|2p25.3|protein-coding	3	7837
RAG1|RAG-1|RNF74|-|11p12|protein-coding	3	5896
LOC728175|-|-|4q35.1|ncRNA	3	728175
GRK5|GPRK5|-|10q26.11|protein-coding	3	2869
GAB3|-|-|Xq28|protein-coding	3	139716
MIR3142HG|-|-|5q33.3|ncRNA	3	107075116
PCDHB14|PCDH-BETA14|-|5q31.3|protein-coding	3	56122
LINC01693|-|-|1q32.3|ncRNA	3	105748977
ARHGAP27|CAMGAP1|PP905|SH3D20|SH3P20|-|17q21.31|protein-coding	3	201176
TMC6|EV1|EVER1|EVIN1|LAK-4P|-|17q25.3|protein-coding	3	11322
CORO7-PAM16|-|-|16p13.3|protein-coding	3	100529144
SLC12A5|EIEE34|EIG14|KCC2|hKCC2|-|20q13.12|protein-coding	3	57468
NOVA2|ANOVA|NOVA3|-|19q13.32|protein-coding	3	4858
SYT1|P65|SVP65|SYT|-|12q21.2|protein-coding	3	6857
LOC115110|-|-|1p36.32|ncRNA	3	115110
ARHGAP25|HEL-S-308|KAIA0053|-|2p13.3|protein-coding	3	9938
KIAA1161|NET37|-|9p13.3|protein-coding	3	57462
RASL10A|RRP22|-|22q12.2|protein-coding	3	10633
KRBA2|-|-|17p13.1|protein-coding	3	124751
NFE2L3|NRF3|-|7p15.2|protein-coding	3	9603
RBM44|-|-|2q37.3|protein-coding	3	375316
IRAK2|IRAK-2|-|3p25.3|protein-coding	3	3656
NUDT4P1|-|-|1q21.2|pseudo	3	440672
MYH10|NMMHC-IIB|NMMHCB|-|17p13.1|protein-coding	3	4628
MYEF2|HsT18564|MEF-2|MST156|MSTP156|myEF-2|-|15q21.1|protein-coding	3	50804
LOC440934|-|-|2q36.1|ncRNA	3	440934
RAMP3|-|-|7p13|protein-coding	3	10268
APLNR|AGTRL1|APJ|APJR|HG11|-|11q12.1|protein-coding	3	187
F11R|CD321|JAM|JAM1|JAMA|JCAM|KAT|PAM-1|-|1q23.3|protein-coding	3	50848
CDC14A|DFNB105|cdc14|hCDC14|-|1p21.2|protein-coding	3	8556
DISC1|C1orf136|SCZD9|-|1q42.2|protein-coding	3	27185
RAPGEF5|GFR|MR-GEF|REPAC|-|7p15.3|protein-coding	3	9771
MIR935|MIRN935|hsa-mir-935|mir-935|-|19q13.42|ncRNA	3	100126325
EFNA5|AF1|EFL5|EPLG7|GLC1M|LERK7|RAGS|-|5q21.3|protein-coding	3	1946
ATG16L2|ATG16B|WDR80|-|11q13.4|protein-coding	3	89849
BCL2L11|BAM|BIM|BOD|-|2q13|protein-coding	3	10018
LOC101927377|-|-|20q13.12|ncRNA	3	101927377
MYCN|MODED|N-myc|NMYC|ODED|bHLHe37|-|2p24.3|protein-coding	3	4613
NOTCH1|AOS5|AOVD1|TAN1|hN1|-|9q34.3|protein-coding	3	4851
DPEP2|MBD2|-|16q22.1|protein-coding	3	64174
NEIL1|FPG1|NEI1|hFPG1|-|15q24.2|protein-coding	3	79661
ACVR2B|ACTRIIB|ActR-IIB|HTX4|-|3p22.2|protein-coding	3	93
NANOS3|NANOS1L|NOS3|ZC2HC12C|-|19p13.12|protein-coding	3	342977
CASC15|LINC00340|-|6p22.3|ncRNA	3	401237
CCDC188|-|-|22q11.21|protein-coding	3	388849
CASKIN2|ANKS5B|-|17q25.1|protein-coding	3	57513
SAMSN1|HACS1|NASH1|SASH2|SH3D6B|SLy2|-|21q11.2|protein-coding	3	64092
FAM198B|AD021|AD036|C4orf18|ENED|-|4q32.1|protein-coding	3	51313
NYAP1|C7orf51|-|7q22.1|protein-coding	3	222950
HS3ST1|3OST|3OST1|-|4p15.33|protein-coding	3	9957
PRDM11|PFM8|-|11p11.2|protein-coding	3	56981
RNF122|-|-|8p12|protein-coding	3	79845
PDE2A|CGS-PDE|PDE2A1|PED2A4|cGSPDE|-|11q13.4|protein-coding	3	5138
TPD52|D52|N8L|PC-1|PrLZ|hD52|-|8q21.13|protein-coding	3	7163
BTG2|APRO1|PC3|TIS21|-|1q32.1|protein-coding	3	7832
GPR182|7TMR|ADMR|AM-R|AMR|G10D|gamrh|hrhAMR|-|12q13.3|protein-coding	3	11318
TUBA8|TUBAL2|-|22q11.21|protein-coding	3	51807
MMP15|MMP-15|MT2-MMP|MT2MMP|MTMMP2|SMCP-2|-|16q21|protein-coding	3	4324
CFI|AHUS3|ARMD13|C3BINA|C3b-INA|FI|IF|KAF|-|4q25|protein-coding	3	3426
UBTD1|-|-|10q24.1-q24.2|protein-coding	3	80019
COL4A1|BSVD|RATOR|-|13q34|protein-coding	3	1282
PIK3CG|PI3CG|PI3K|PI3Kgamma|PIK3|p110gamma|p120-PI3K|-|7q22.3|protein-coding	3	5294
ZFHX4-AS1|-|-|8q21.13|ncRNA	3	100192378
MPZL3|-|-|11q23.3|protein-coding	3	196264
MERTK|MER|RP38|Tyro12|c-Eyk|c-mer|-|2q13|protein-coding	3	10461
COL9A3|DJ885L7.4.1|EDM3|IDD|MED|-|20q13.33|protein-coding	3	1299
GGA1|-|-|22q13.1|protein-coding	3	26088
CETP|BPIFF|HDLCQ10|-|16q13|protein-coding	3	1071
RBM38|HSRNASEB|RNPC1|SEB4B|SEB4D|dJ800J21.2|-|20q13.31|protein-coding	3	55544
PRRG2|PRGP2|-|19q13.33|protein-coding	3	5639
STOX2|-|-|4q35.1|protein-coding	3	56977
NPR1|ANPRA|ANPa|GUC2A|GUCY2A|NPRA|-|1q21.3|protein-coding	3	4881
LINC01704|-|-|1q23.1|ncRNA	3	646268
LOC100505938|-|-|7p21.3|ncRNA	3	100505938
PECAM1|CD31|CD31/EndoCAM|GPIIA'|PECA1|PECAM-1|endoCAM|-|17q23.3|protein-coding	3	5175
DTNBP1|BLOC1S8|DBND|HPS7|My031|SDY|-|6p22.3|protein-coding	3	84062
SEMA6B|SEM-SEMA-Y|SEMA-VIB|SEMAN|semaZ|-|19p13.3|protein-coding	3	10501
TECPR1|-|-|7q21.3|protein-coding	3	25851
RASSF7|C11orf13|HRAS1|HRC1|-|11p15.5|protein-coding	3	8045
DGKE|AHUS7|DAGK5|DAGK6|DGK|NPHS7|-|17q22|protein-coding	3	8526
USHBP1|AIEBP|MCC2|-|19p13.11|protein-coding	3	83878
ZNF443|ZK1|-|19p13.2|protein-coding	3	10224
NBEAL2|BDPLT4|GPS|-|3p21.31|protein-coding	3	23218
HSPG2|HSPG|PLC|PRCAN|SJA|SJS|SJS1|-|1p36.12|protein-coding	3	3339
FLJ34503|-|-|6q21|ncRNA	3	285759
RGPD2|NUP358|RANBP2L2|RGP2|-|2p11.2|protein-coding	3	729857
LOC284578|-|-|1q32.1|ncRNA	3	284578
PCDHB13|PCDH-BETA13|-|5q31.3|protein-coding	3	56123
SOX7|-|-|8p23.1|protein-coding	3	83595
LRMP|JAW1|-|12p12.1|protein-coding	3	4033
LINC01132|-|-|1q42.3|ncRNA	3	100506810
TMEM156|-|-|4p14|protein-coding	3	80008
ZNF853|-|-|7p22.1|protein-coding	3	54753
HAGLROS|-|-|2q31.1|ncRNA	3	102800310
PCDHB11|ME2|PCDH-BETA11|-|5q31.3|protein-coding	3	56125
LYVE1|CRSBP-1|HAR|LYVE-1|XLKD1|-|11p15.4|protein-coding	3	10894
GFOD2|-|-|16q22.1|protein-coding	3	81577
MMP10|SL-2|STMY2|-|11q22.2|protein-coding	3	4319
VLDLR|CAMRQ1|CARMQ1|CHRMQ1|VLDL-R|VLDLRCH|-|9p24.2|protein-coding	3	7436
KIF4B|-|-|5q33.2|protein-coding	3	285643
MIR1182|MIRN1182|hsa-mir-1182|-|1q42.2|ncRNA	3	100302132
PPT2|C6orf8|G14|PPT-2|-|6p21.32|protein-coding	3	9374
CD93|C1QR1|C1qR(P)|C1qRP|CDw93|ECSM3|MXRA4|dJ737E23.1|-|20p11.21|protein-coding	3	22918
ADAMTS18|ADAMTS21|KNO2|MMCAT|-|16q23.1|protein-coding	3	170692
RASSF4|AD037|-|10q11.21|protein-coding	3	83937
NUDT4|DIPP2|DIPP2alpha|DIPP2beta|HDCMB47P|-|12q22|protein-coding	3	11163
LRFN1|SALM2|-|19q13.2|protein-coding	3	57622
NID2|NID-2|-|14q22.1|protein-coding	3	22795
RAMP2-AS1|-|-|17q21.2|ncRNA	3	100190938
PDGFA|PDGF-A|PDGF1|-|7p22.3|protein-coding	3	5154
GPRC5B|RAIG-2|RAIG2|-|16p12.3|protein-coding	3	51704
LONRF3|RNF127|-|Xq24|protein-coding	3	79836
ATP11A|ATPIH|ATPIS|-|13q34|protein-coding	3	23250
ARMC5|AIMAH2|-|16p11.2|protein-coding	3	79798
CHD7|CRG|HH5|IS3|KAL5|-|8q12.2|protein-coding	3	55636
ACER2|ALKCDase2|ASAH3L|-|9p22.1|protein-coding	3	340485
ARL4C|ARL7|LAK|-|2q37.1|protein-coding	3	10123
GRAMD1A|KIAA1533|-|19q13.11|protein-coding	3	57655
ARHGEF37|-|-|5q32|protein-coding	3	389337
DUSP22|JKAP|JSP-1|JSP1|LMW-DSP2|LMWDSP2|MKP-x|MKPX|VHX|-|6p25.3|protein-coding	3	56940
N4BP3|LZTS4|-|5q35.3|protein-coding	3	23138
ST3GAL6|SIAT10|ST3GALVI|-|3q12.1|protein-coding	3	10402
VSIG2|2210413P10Rik|CTH|CTXL|-|11q24.2|protein-coding	3	23584
CLU|AAG4|APO-J|APOJ|CLI|CLU1|CLU2|KUB1|NA1/NA2|SGP-2|SGP2|SP-40|TRPM-2|TRPM2|-|8p21.1|protein-coding	3	1191
ICAM2|CD102|-|17q23.3|protein-coding	3	3384
ANKRD30BL|ANKRD30BP3|NCRNA00164|-|2q21.2|pseudo	3	554226
PTGFRN|CD315|CD9P-1|EWI-F|FPRP|SMAP-6|-|1p13.1|protein-coding	3	5738
SCARF1|SREC|SREC-I|SREC1|-|17p13.3|protein-coding	3	8578
GIMAP1|HIMAP1|IAN2|IMAP1|IMAP38|-|7q36.1|protein-coding	3	170575
LOC100130357|-|-|6p24.1|protein-coding	3	100130357
RASGRF1|CDC25|CDC25L|GNRP|GRF1|GRF55|H-GRF55|PP13187|ras-GRF1|-|15q25.1|protein-coding	3	5923
RGL1|RGL|-|1q25.3|protein-coding	3	23179
SMAD1|BSP-1|BSP1|JV4-1|JV41|MADH1|MADR1|-|4q31.21|protein-coding	3	4086
GCOM1|GRINL1A|Gcom2|MYZAP|MYZAP-POLR2M|gcom|-|15q21.3|protein-coding	3	145781
INSR|CD220|HHF5|-|19p13.2|protein-coding	3	3643
RALGAPA2|AS250|C20orf74|bA287B20.1|dJ1049G11|dJ1049G11.4|p220|-|20p11.23|protein-coding	3	57186
ZNF48|ZNF553|-|16p11.2|protein-coding	3	197407
BMS1P21|-|-|10q22.3|pseudo	3	100288974
HOXB9|HOX-2.5|HOX2|HOX2E|-|17q21.32|protein-coding	3	3219
PCDH1|PC42|PCDH42|-|5q31.3|protein-coding	3	5097
LOC101927359|-|-|4q28.3|ncRNA	3	101927359
NUAK1|ARK5|-|12q23.3|protein-coding	3	9891
MECOM|AML1-EVI-1|EVI1|KMT8E|MDS1|MDS1-EVI1|PRDM3|RUSAT2|-|3q26.2|protein-coding	3	2122
MID1|BBBG1|FXY|GBBB1|MIDIN|OGS1|OS|OSX|RNF59|TRIM18|XPRF|ZNFXY|-|Xp22.2|protein-coding	3	4281
LINC01583|-|-|15q25.2|ncRNA	3	101929690
C22orf34|-|-|22q13.33|protein-coding	3	348645
SHANK3|DEL22q13.3|PROSAP2|PSAP2|SCZD15|SPANK-2|-|22q13.33|protein-coding	3	85358
LINC00528|C22orf37|-|22q11.21|ncRNA	3	200298
C5orf63|YDR286C|-|5q23.2|protein-coding	3	401207
MYO5B|-|-|18q21.1|protein-coding	3	4645
TMC8|EV2|EVER2|EVIN2|-|17q25.3|protein-coding	3	147138
KIF21B|-|-|1q32.1|protein-coding	3	23046
NFIA-AS2|-|-|1p31.3|ncRNA	3	100996570
GIMAP2|HIMAP2|IAN12|IMAP2|-|7q36.1|protein-coding	3	26157
CCDC88C|DAPLE|HKRP2|KIAA1509|SCA40|-|14q32.11-q32.12|protein-coding	3	440193
FAM167B|C1orf90|-|1p35.2|protein-coding	3	84734
RHOB|ARH6|ARHB|MST081|MSTP081|RHOH6|-|2p24.1|protein-coding	3	388
MAGI1|AIP-3|AIP3|BAIAP1|BAP-1|BAP1|MAGI-1|Magi1d|TNRC19|WWP3|-|3p14.1|protein-coding	3	9223
ZNF620|-|-|3p22.1|protein-coding	3	253639
LOC102724360|-|-|19p13.11|ncRNA	3	102724360
MAP3K1|MAPKKK1|MEKK|MEKK 1|MEKK1|SRXY6|-|5q11.2|protein-coding	3	4214
EPB41L4A-AS2|-|-|5q22.2|ncRNA	3	54508
ZCCHC2|C18orf49|-|18q21.33|protein-coding	3	54877
TNFRSF4|ACT35|CD134|IMD16|OX40|TXGP1L|-|1p36.33|protein-coding	3	7293
LXN|ECI|TCI|-|3q25.32|protein-coding	3	56925
IL17D|IL-17D|-|13q12.11|protein-coding	3	53342
TMEM235|ARGM1|-|17q25.3|protein-coding	3	283999
DLGAP1-AS2|-|-|18p11.31|ncRNA	3	84777
LOC101929726|-|-|6p21.1|protein-coding	3	101929726
FAM219A|C9orf25|-|9p13.3|protein-coding	3	203259
SOX21|SOX25|-|13q32.1|protein-coding	3	11166
BTNL9|BTN3|BTN8|VDLS1900|-|5q35.3|protein-coding	3	153579
C17orf67|-|-|17q22|protein-coding	3	339210
RFX3|-|-|9p24.2|protein-coding	3	5991
HEY1|BHLHb31|CHF2|HERP2|HESR1|HRT-1|OAF1|hHRT1|-|8q21.13|protein-coding	3	23462
RNF180|RINES|-|5q12.3|protein-coding	3	285671
LY6H|NMLY6|-|8q24.3|protein-coding	3	4062
PDE10A|ADSD2|HSPDE10A|IOLOD|LINC00473|PDE10A19|-|6q27|protein-coding	3	10846
MIR3960|-|-|9q34.11|ncRNA	3	100616250
MIR663A|MIR663|MIRN663|hsa-mir-663|hsa-mir-663a|mir-663a|-|20p11.1|ncRNA	3	724033
ST6GALNAC3|PRO7177|SIAT7C|ST6GALNACIII|STY|-|1p31.1|protein-coding	3	256435
GCH1|DYT14|DYT5|DYT5a|GCH|GTP-CH-1|GTPCH1|HPABH4B|-|14q22.2|protein-coding	3	2643
S1PR4|EDG6|LPC1|S1P4|SLP4|-|19p13.3|protein-coding	3	8698
PRKD2|HSPC187|PKD2|nPKC-D2|-|19q13.32|protein-coding	3	25865
CCL15-CCL14|-|-|17q12|ncRNA	3	348249
ERG|erg-3|p55|-|21q22.2|protein-coding	3	2078
PLVAP|FELS|PV-1|PV1|gp68|-|19p13.11|protein-coding	3	83483
MAMDC2|-|-|9q21.12|protein-coding	3	256691
RPP25|-|-|15q24.2|protein-coding	3	54913
EPHX4|ABHD7|EH4|EPHXRP|-|1p22.1|protein-coding	3	253152
DAAM1|-|-|14q23.1|protein-coding	3	23002
KIAA1211|-|-|4q12|protein-coding	3	57482
GDF1|DORV|DTGA3|RAI|-|19p13.11|protein-coding	3	2657
S1PR1|CD363|CHEDG1|D1S3362|ECGF1|EDG-1|EDG1|S1P1|-|1p21.2|protein-coding	3	1901
GKAP1|FKSG21|GKAP42|-|9q21.32|protein-coding	3	80318
CTLA4|ALPS5|CD|CD152|CELIAC3|CTLA-4|GRD4|GSE|IDDM12|-|2q33.2|protein-coding	3	1493
EFNB1|CFND|CFNS|EFB1|EFL3|EPLG2|Elk-L|LERK2|-|Xq13.1|protein-coding	3	1947
EPB41L4A|EPB41L4|NBL4|-|5q22.1-q22.2|protein-coding	3	64097
CCDC69|-|-|5q33.1|protein-coding	3	26112
ADORA2A|A2aR|ADORA2|RDC8|-|22q11.23|protein-coding	3	135
RRN3P3|-|-|16p12.2|pseudo	3	100131998
RNF144A-AS1|-|-|2p25.1|ncRNA	3	386597
LINC00642|-|-|14q32.11|ncRNA	3	400238
PDPN|AGGRUS|GP36|GP40|Gp38|HT1A-1|OTS8|PA2.26|T1A|T1A-2|T1A2|TI1A|-|1p36.21|protein-coding	3	10630
LGALS9|HUAT|LGALS9A|-|17q11.2|protein-coding	3	3965
TLE2|ESG|ESG2|GRG2|-|19p13.3|protein-coding	3	7089
PDK4|-|-|7q21.3|protein-coding	3	5166
DLGAP3|DAP3|SAPAP3|-|1p34.3|protein-coding	3	58512
PRKCH|PKC-L|PKCL|PRKCL|nPKC-eta|-|14q23.1|protein-coding	3	5583
LTF|GIG12|HEL110|HLF2|LF|-|3p21.31|protein-coding	3	4057
PTPRK|R-PTP-kappa|-|6q22.33|protein-coding	3	5796
ZNF521|EHZF|Evi3|-|18q11.2|protein-coding	3	25925
SCN11A|FEPS3|HSAN7|NAV1.9|NaN|PN5|SCN12A|SNS-2|-|3p22.2|protein-coding	3	11280
SAP25|-|-|7q22.1|protein-coding	3	100316904
LILRB1|CD85J|ILT-2|ILT2|LIR-1|LIR1|MIR-7|MIR7|PIR-B|PIRB|-|19q13.42|protein-coding	3	10859
TLE6|GRG6|PREMBL|-|19p13.3|protein-coding	3	79816
CHST1|C6ST|GST-1|KS6ST|KSGal6ST|KSST|-|11p11.2|protein-coding	3	8534
MYL4|ALC1|AMLC|GT1|PRO1957|-|17q21.32|protein-coding	3	4635
MARCKSL1|F52|MACMARCKS|MLP|MLP1|MRP|-|1p35.1|protein-coding	3	65108
CSRNP1|AXUD1|CSRNP-1|FAM130B|TAIP-3|URAX1|-|3p22.2|protein-coding	3	64651
CHST15|BRAG|GALNAC4S-6ST|-|10q26.13|protein-coding	3	51363
OR1L8|OR9-24|-|9q33.2|protein-coding	3	138881
SLC46A3|FKSG16|-|13q12.3|protein-coding	3	283537
LINC00323|C21orf130|NCRNA00323|PRED42|-|21q22.2|ncRNA	3	284835
GPR146|PGR8|-|7p22.3|protein-coding	3	115330
ABCG2|ABC15|ABCP|BCRP|BCRP1|BMDP|CD338|CDw338|EST157481|GOUT1|MRX|MXR|MXR-1|MXR1|UAQTL1|-|4q22.1|protein-coding	3	9429
GAB2|-|-|11q14.1|protein-coding	3	9846
HCP5|6S2650E|D6S2650E|P5-1|-|6p21.33|ncRNA	3	10866
ISG20|CD25|HEM45|-|15q26.1|protein-coding	3	3669
RASIP1|RAIN|-|19q13.33|protein-coding	3	54922
ETS1|ETS-1|EWSR2|c-ets-1|p54|-|11q24.3|protein-coding	3	2113
AMN1|-|-|12p11.21|protein-coding	3	196394
SUSD6|DRAGO|KIAA0247|-|14q24.1|protein-coding	3	9766
PRDM1|BLIMP1|PRDI-BF1|-|6q21|protein-coding	3	639
GRPEL2|Mt-GrpE#2|-|5q32|protein-coding	3	134266
JUP|ARVD12|CTNNG|DP3|DPIII|PDGB|PKGB|-|17q21.2|protein-coding	3	3728
ZCCHC18|PNMA7B|SIZN2|-|Xq22.2|protein-coding	3	644353
EPOR|EPO-R|-|19p13.2|protein-coding	3	2057
TDRD10|-|-|1q21.3|protein-coding	3	126668
CNOT6L|CCR4b|-|4q21.1|protein-coding	3	246175
LYL1|bHLHa18|-|19p13.13|protein-coding	3	4066
MIR548AA1|-|-|8q24.13|ncRNA	3	100500863
BCR|ALL|BCR1|CML|D22S11|D22S662|PHL|-|22q11.23|protein-coding	3	613
CPNE5|COPN5|CPN5|-|6p21.2|protein-coding	3	57699
MPP4|ALS2CR5|DLG6|-|2q33.1|protein-coding	3	58538
GBA2|AD035|NLGase|SPG46|-|9p13.3|protein-coding	3	57704
GPR37|EDNRBL|PAELR|hET(B)R-LP|-|7q31.33|protein-coding	3	2861
DSG2|CDHF5|HDGC|-|18q12.1|protein-coding	3	1829
IZUMO1|IZUMO|OBF|-|19q13.33|protein-coding	3	284359
TJP1|ZO-1|-|15q13.1|protein-coding	3	7082
XIRP2|CMYA3|-|2q24.3|protein-coding	3	129446
TSPAN7|A15|CCG-B7|CD231|DXS1692E|MRX58|MXS1|TALLA-1|TM4SF2|TM4SF2b|-|Xp11.4|protein-coding	3	7102
SYT17|sytXVII|-|16p12.3|protein-coding	3	51760
MIR2861|BMND15|MIRN2861|-|9q34.11|ncRNA	3	100422910
NFATC1|NF-ATC|NF-ATc1.2|NFAT2|NFATc|-|18q23|protein-coding	3	4772
ZMAT1|-|-|Xq22.1|protein-coding	3	84460
L3MBTL3|MBT-1|MBT1|-|6q23.1|protein-coding	3	84456
OVGP1|CHIT5|EGP|MUC9|OGP|-|1p13.2|protein-coding	3	5016
C6orf141|-|-|6p12.3|protein-coding	3	135398
SCHIP1|SCHIP-1|-|3q25.32-q25.33|protein-coding	3	29970
FAM212B|C1orf183|-|1p13.2|protein-coding	3	55924
CITED4|-|-|1p34.2|1p35-p34|protein-coding	3	163732
FAM124A|-|-|13q14.3|protein-coding	3	220108
C15orf39|-|-|15q24.2|protein-coding	3	56905
PLEKHA8|FAPP2|-|7p14.3|protein-coding	3	84725
PSMB8-AS1|TAP1-AS1|TAPSAR1|-|6p21.32|ncRNA	3	100507463
CARD8|CARDINAL|DACAR|DAKAR|NDPP|NDPP1|TUCAN|-|19q13.33|protein-coding	3	22900
ADM5|AM5|C19orf76|-|19q13.33|protein-coding	3	199800
GALNT15|GALNACT15|GALNT13|GALNT7|GALNTL2|PIH5|pp-GalNAc-T15|-|3p25.1|protein-coding	3	117248
SVIL|-|-|10p11.23|protein-coding	3	6840
SLC7A7|LAT3|LPI|MOP-2|Y+LAT1|y+LAT-1|-|14q11.2|protein-coding	3	9056
BIN1|AMPH2|AMPHL|SH3P9|-|2q14.3|protein-coding	3	274
ITGA9|ALPHA-RLC|ITGA4L|RLC|-|3p22.2|protein-coding	3	3680
PRND|DOPPEL|DPL|PrPLP|dJ1068H6.4|-|20p13|protein-coding	3	23627
LOC100507472|-|-|15q26.3|ncRNA	3	100507472
ADAM19|FKSG34|MADDAM|MLTNB|-|5q33.3|protein-coding	3	8728
CLEC1A|CLEC-1|CLEC1|-|12p13.2|protein-coding	3	51267
PDE4B|DPDE4|PDEIVB|-|1p31.3|protein-coding	3	5142
UBAP1L|UBAP-1L|-|15q22.31|protein-coding	3	390595
GVINP1|GVIN1|GVIN1P|VLIG-1|VLIG1|-|11p15.4|pseudo	3	387751
PON3|-|-|7q21.3|protein-coding	3	5446
THEMIS2|C1orf38|ICB-1|-|1p35.3|protein-coding	3	9473
SLC12A7|KCC4|-|5p15.33|protein-coding	3	10723
LOC151174|-|-|2q37.3|ncRNA	3	151174
SAMD5|dJ875H10.1|-|6q24.3|protein-coding	3	389432
HIP1R|HIP12|HIP3|ILWEQ|-|12q24.31|protein-coding	3	9026
ANXA3|ANX3|-|4q21.21|protein-coding	3	306
FGD6|ZFYVE24|-|12q22|protein-coding	3	55785
LOC100130476|-|-|6q23.3|ncRNA	3	100130476
LOC101926964|-|-|1p32.1-p31.3|ncRNA	3	101926964
CLEC2D|CLAX|LLT1|OCIL|-|12p13.31|protein-coding	3	29121
ZSWIM4|-|-|19p13.13-p13.12|protein-coding	3	65249
BCAM|AU|CD239|LU|MSK19|-|19q13.32|protein-coding	3	4059
ZSCAN16|ZNF392|ZNF435|dJ265C24.3|-|6p22.1|protein-coding	3	80345
KLHL6|-|-|3q27.1|protein-coding	3	89857
SLC37A1|G3PP|-|21q22.3|protein-coding	3	54020
XXYLT1-AS2|-|-|3q29|ncRNA	3	101410543
ACHE|ACEE|ARACHE|N-ACHE|YT|-|7q22.1|protein-coding	3	43
DCHS1|CDH19|CDH25|CDHR6|FIB1|MVP2|PCDH16|VMLDS1|-|11p15.4|protein-coding	3	8642
MAFF|U-MAF|hMafF|-|22q13.1|protein-coding	3	23764
EIF2B2|EIF-2Bbeta|EIF2B|-|14q24.3|protein-coding	3	8892
CEP68|KIAA0582|-|2p14|protein-coding	3	23177
TRG-AS1|TCRGV|-|7p14.1|ncRNA	3	100506776
PTCHD4|C6orf138|PTCH53|dJ402H5.2|-|6p12.3|protein-coding	3	442213
AFDN-AS1|C6orf124|HGC6.4|MLLT4-AS1|dJ431P23.3|-|6q27|ncRNA	3	653483
TSPAN12|EVR5|NET-2|NET2|TM4SF12|-|7q31.31|protein-coding	3	23554
GPR160|GPCR1|GPCR150|-|3q26.2|protein-coding	3	26996
RGS9|PERRS|RGS9L|-|17q24.1|protein-coding	3	8787
CABP4|CRSD|CSNB2B|-|11q13.2|protein-coding	3	57010
CYP2S1|CYPIIS1|-|19q13.2|protein-coding	3	29785
LHX6|LHX6.1|-|9q33.2|protein-coding	3	26468
TSPAN18|TSPAN|-|11p11.2|protein-coding	3	90139
LOC90246|-|-|3q21.3|ncRNA	3	90246
CCDC153|-|-|11q23.3|protein-coding	3	283152
C10orf128|-|-|10q11.23|protein-coding	3	170371
PGM2L1|BM32A|PMMLP|-|11q13.4|protein-coding	3	283209
DUSP8|C11orf81|HB5|HVH-5|HVH8|-|11p15.5|protein-coding	3	1850
WFS1|CTRCT41|WFRS|WFS|WFSL|-|4p16.1|protein-coding	3	7466
VASH1|KIAA1036|-|14q24.3|protein-coding	3	22846
ANKS1A|ANKS1|-|6p21.31|protein-coding	3	23294
KIAA1656|-|-|22q12.2|ncRNA	3	85371
LOC101929680|-|-|2q24.3|ncRNA	3	101929680
NBAT1|CASC14|NBAT-1|-|6p22.3|ncRNA	3	729177
LRRC38|-|-|1p36.21|protein-coding	3	126755
LCP2|SLP-76|SLP76|-|5q35.1|protein-coding	3	3937
ITGA2B|BDPLT16|BDPLT2|CD41|CD41B|GP2B|GPIIb|GT|GTA|HPA3|PPP1R93|-|17q21.31|protein-coding	3	3674
BAZ2B|WALp4|-|2q24.2|protein-coding	3	29994
PCAT19|LINC01190|-|19q13.2|ncRNA	3	100505495
TLE1|ESG|ESG1|GRG1|-|9q21.32|protein-coding	3	7088
CPT1B|CPT1-M|CPT1M|CPTI|CPTI-M|M-CPT1|MCCPT1|MCPT1|-|22q13.33|protein-coding	3	1375
FXYD6|-|-|11q23.3|protein-coding	3	53826
TNFRSF18|AITR|CD357|GITR|GITR-D|-|1p36.33|protein-coding	3	8784
SLC26A4|DFNB4|EVA|PDS|TDH2B|-|7q22.3|protein-coding	3	5172
B3GNT8|B3GALT7|BGALT15|beta3Gn-T8|-|19q13.2|protein-coding	3	374907
KRT7|CK7|K2C7|K7|SCL|-|12q13.13|protein-coding	3	3855
MGST2|GST2|MGST-II|-|4q31.1|protein-coding	3	4258
NLRC5|CLR16.1|NOD27|NOD4|-|16q13|protein-coding	3	84166
ITGB4|CD104|GP150|-|17q25.1|protein-coding	3	3691
TOR4A|C9orf167|-|9q34.3|protein-coding	3	54863
B3GALT4|BETA3GALT4|GALT2|GALT4|-|6p21.32|protein-coding	3	8705
TNFRSF11A|CD265|FEO|LOH18CR1|ODFR|OFE|OPTB7|OSTS|PDB2|RANK|TRANCER|-|18q21.33|protein-coding	3	8792
GRAPL|-|-|17p11.2|protein-coding	3	400581
ABCA5|ABC13|EST90625|-|17q24.3|protein-coding	3	23461
TBC1D8|AD3|GRAMD8|HBLP1|TBC1D8A|VRP|-|2q11.2|protein-coding	3	11138
ZNF205|RhitH|ZNF210|Zfp13|-|16p13.3|protein-coding	3	7755
HERC2P2|D15F37S3|MN7|-|15q11.2|pseudo	3	400322
GPIHBP1|GPI-HBP1|HYPL1D|-|8q24.3|protein-coding	3	338328
MSMP|PSMP|-|9p13.3|protein-coding	3	692094
HLA-F|CDA12|HLA-5.4|HLA-CDA12|HLAF|-|6p22.1|protein-coding	3	3134
SPATA12|SRG5|-|3p14.3|protein-coding	3	353324
CHSY3|CHSY2|CSS3|-|5q23.3|protein-coding	3	337876
PCDH19|EFMR|EIEE9|-|Xq22.1|protein-coding	3	57526
ANGPTL2|ARP2|HARP|-|9q33.3|protein-coding	3	23452
LRRC75A|C17orf76|FAM211A|-|17p11.2|protein-coding	3	388341
PIM3|pim-3|-|22q13.33|protein-coding	3	415116
ZASP|-|-|7q22.1|protein-coding	3	101927655
NFATC2|NFAT1|NFATP|-|20q13.2|protein-coding	3	4773
VIP|PHM27|-|6q25.2|protein-coding	3	7432
PLEKHG5|CMTRIC|DSMA4|GEF720|Syx|Tech|-|1p36.31|protein-coding	3	57449
NLRP2|CLR19.9|NALP2|NBS1|PAN1|PYPAF2|-|19q13.42|protein-coding	3	55655
TP53I11|PIG11|-|11p11.2|protein-coding	3	9537
ISYNA1|INO1|INOS|IPS|IPS 1|IPS-1|-|19p13.11|protein-coding	3	51477
CD34|-|-|1q32.2|protein-coding	3	947
ACR|-|-|22q13.33|protein-coding	3	49
FBXW4P1|FBW3|FBXW3|SHFM3P1|-|22q11.23|pseudo	3	26226
FAM118A|C22orf8|-|22q13.31|protein-coding	3	55007
CDRT1|C170RF1|C17ORF1|C17ORF1A|FBXW10B|FBXW10P1|HREP|SM25H2|-|17p12|protein-coding	3	374286
BMP6|VGR|VGR1|-|6p24.3|protein-coding	3	654
KIF13B|GAKIN|-|8p12|protein-coding	3	23303
PSORS1C1|C6orf16|SEEK1|-|6p21.33|protein-coding	3	170679
CCDC85C|-|-|14q32.2|protein-coding	3	317762
CNTNAP3|CASPR3|CNTNAP3A|-|9p12|protein-coding	3	79937
NOV|CCN3|IBP-9|IGFBP-9|IGFBP9|NOVh|-|8q24.12|protein-coding	3	4856
SNCG|BCSG1|SR|-|10q23.2|protein-coding	3	6623
CA3-AS1|-|-|8q21.2|ncRNA	3	100996348
VILL|-|-|3p22.2|protein-coding	3	50853
CPT1C|CATL1|CPT1-B|CPT1P|CPTI-B|CPTIC|SPG73|-|19q13.33|protein-coding	3	126129
SLC43A2|LAT4|-|17p13.3|protein-coding	3	124935
COL4A2|ICH|POREN2|-|13q34|protein-coding	3	1284
NRARP|-|-|9q34.3|protein-coding	3	441478
SCNN1G|BESC3|ENaCg|ENaCgamma|PHA1|SCNEG|-|16p12.2|protein-coding	3	6340
KBTBD11|KLHDC7C|-|8p23.3|protein-coding	3	9920
WSCD1|-|-|17p13.2|protein-coding	3	23302
MIR663AHG|-|-|20p11.1|ncRNA	3	284801
LOC440895|-|-|2q13|pseudo	3	440895
PTP4A3|PRL-3|PRL-R|PRL3|-|8q24.3|protein-coding	3	11156
PKD1L1|HTX8|PRO19563|-|7p12.3|protein-coding	3	168507
DNMT3A|DNMT3A2|M.HsaIIIA|TBRS|-|2p23.3|protein-coding	3	1788
CAPN12|-|-|19q13.2|protein-coding	3	147968
PHF10|BAF45A|XAP135|-|6q27|protein-coding	3	55274
ANO9|PIG5|TMEM16J|TP53I5|-|11p15.5|protein-coding	3	338440
PLA2G4C|CPLA2-gamma|-|19q13.33|protein-coding	3	8605
APLN|APEL|XNPEP2|-|Xq26.1|protein-coding	3	8862
FAM84B|BCMP101|NSE2|-|8q24.21|protein-coding	3	157638
ACKR3|CMKOR1|CXC-R7|CXCR-7|CXCR7|GPR159|RDC-1|RDC1|-|2q37.3|protein-coding	3	57007
RAB17|-|-|2q37.3|protein-coding	3	64284
COL18A1|KNO|KNO1|KS|-|21q22.3|protein-coding	3	80781
MIR7844|hsa-mir-7844|-|12q22|ncRNA	3	102465834
CSGALNACT1|CSGalNAcT-1|ChGn|beta4GalNAcT|-|8p21.3|protein-coding	3	55790
MIR6765|hsa-mir-6765|-|14q32.33|ncRNA	3	102465458
ABCA7|ABCA-SSN|ABCX|AD9|-|19p13.3|protein-coding	3	10347
BCL6B|BAZF|ZBTB28|ZNF62|-|17p13.1|protein-coding	3	255877
KIAA0040|-|-|1q25.1|protein-coding	3	9674
FRMD8|FKSG44|-|11q13.1|protein-coding	3	83786
HLA-J|CDA12|D6S203|HLA-59|HLA-CDA12|-|6p22.1|pseudo	3	3137
LLGL2|HGL|Hugl-2|LGL2|-|17q25.1|protein-coding	3	3993
MTMR9LP|MTMR9L|-|1p35.2|pseudo	3	339483
UBD|FAT10|GABBR1|UBD-3|-|6p22.1|protein-coding	3	10537
OAS2|-|-|12q24.13|protein-coding	3	4939
MAFA|RIPE3b1|hMafA|-|8q24.3|protein-coding	3	389692
VSIR|B7-H5|B7H5|C10orf54|DD1alpha|GI24|PD-1H|PP2135|SISP1|VISTA|-|10q22.1|protein-coding	3	64115
DAPK2|DRP-1|DRP1|-|15q22.31|protein-coding	3	23604
SNCAIP|SYPH1|Sph1|-|5q23.2|protein-coding	3	9627
IRF7|IMD39|IRF-7H|IRF7A|IRF7B|IRF7C|IRF7H|-|11p15.5|protein-coding	3	3665
GPR162|A-2|GRCA|-|12p13.31|protein-coding	3	27239
SEMA6C|SEMAY|m-SemaY|m-SemaY2|-|1q21.3|protein-coding	3	10500
PCDH12|VE-cadherin-2|VECAD2|-|5q31.3|protein-coding	3	51294
KHK|-|-|2p23.3|protein-coding	3	3795
EFNA1|B61|ECKLG|EFL1|EPLG1|LERK-1|LERK1|TNFAIP4|-|1q22|protein-coding	3	1942
NETO2|BTCL2|NEOT2|-|16q12.1|protein-coding	3	81831
IER2|ETR101|-|19p13.13|protein-coding	3	9592
ST3GAL6-AS1|-|-|3q12.1|ncRNA	3	100874207
EFCC1|C3orf73|CCDC48|-|3q21.3|protein-coding	3	79825
GDPD1|GDE4|-|17q22|protein-coding	3	284161
FAM69B|C9orf136|pp6977|-|9q34.3|protein-coding	3	138311
TMEM189|KUA|-|20q13.13|protein-coding	3	387521
RASSF2|CENP-34|RASFADIN|-|20p13|protein-coding	3	9770
GIMAP7|IAN7|hIAN7|-|7q36.1|protein-coding	3	168537
MIR126|MIRN126|miRNA126|mir-126|-|9q34.3|ncRNA	3	406913
TFF3|ITF|P1B|TFI|-|21q22.3|protein-coding	3	7033
FAM213A|C10orf58|PAMM|-|10q23.1|protein-coding	3	84293
CYYR1|C21orf95|-|21q21.3|protein-coding	3	116159
SAMD14|-|-|17q21.33|protein-coding	3	201191
ADGRG3|GPR97|PB99|PGR26|-|16q21|protein-coding	3	222487
APOLD1|VERGE|-|12p13.1|protein-coding	3	81575
TNIK|MRT54|-|3q26.2-q26.31|protein-coding	3	23043
PLA1A|PS-PLA1|PSPLA1|-|3q13.33|protein-coding	3	51365
MIR6821|hsa-mir-6821|-|22q13.33|ncRNA	3	102465493
CACNG8|-|-|19q13.42|protein-coding	3	59283
PROX1|-|-|1q32.3|protein-coding	3	5629
LPCAT2|AGPAT11|AYTL1|LysoPAFAT|-|16q12.2|protein-coding	3	54947
GJC2|CX46.6|Cx47|GJA12|HLD2|LMPH1C|PMLDAR|SPG44|-|1q42.13|protein-coding	3	57165
GABRR2|-|-|6q15|protein-coding	3	2570
LOC100288570|-|-|2q13|pseudo	3	100288570
TNFSF10|APO2L|Apo-2L|CD253|TL2|TNLG6A|TRAIL|-|3q26.31|protein-coding	3	8743
ST3GAL1|Gal-NAc6S|SIAT4A|SIATFL|ST3GalA|ST3GalA.1|ST3GalIA|ST3GalIA,1|ST3O|-|8q24.22|protein-coding	3	6482
CELSR1|ADGRC1|CDHF9|FMI2|HFMI2|ME2|-|22q13.31|protein-coding	3	9620
LINC01197|-|-|15q26.2|ncRNA	3	400456
MDS2|-|-|1p36.11|protein-coding	3	259283
ACSL5|ACS2|ACS5|FACL5|-|10q25.2|protein-coding	3	51703
ARHGEF3|GEF3|STA3|XPLN|-|3p14.3|protein-coding	3	50650
PTPRCAP|CD45-AP|LPAP|-|11q13.2|protein-coding	3	5790
GRAP|-|-|17p11.2|protein-coding	3	10750
DLL4|AOS6|hdelta2|-|15q15.1|protein-coding	3	54567
MIR6891|hsa-mir-6891|-|6p21.33|ncRNA	3	102465537
MIR600HG|C9orf45|GL012|NCRNA00287|-|9q33.3|ncRNA	3	81571
PRR29-AS1|-|-|17q23.3|ncRNA	3	400612
CHRNA1|ACHRA|ACHRD|CHRNA|CMS1A|CMS1B|CMS2A|FCCMS|SCCMS|-|2q31.1|protein-coding	3	1134
GNA14|-|-|9q21.2|protein-coding	3	9630
HID1|C17orf28|DMC1|HID-1|-|17q25.1|protein-coding	3	283987
AQP7P3|AQPap-3|-|9q21.11|pseudo	3	441432
ARVCF|-|-|22q11.21|protein-coding	3	421
PURG|PURG-A|PURG-B|-|8p12|protein-coding	3	29942
KRT8|CARD2|CK-8|CK8|CYK8|K2C8|K8|KO|-|12q13.13|protein-coding	3	3856
KIT|C-Kit|CD117|PBT|SCFR|-|4q12|protein-coding	3	3815
LRRC70|SLRN|-|5q12.1|protein-coding	3	100130733
LOC401286|-|-|6q27|ncRNA	3	401286
SH3TC1|-|-|4p16.1|protein-coding	3	54436
PPM1H|ARHCL1|NERPP-2C|URCC2|-|12q14.1-q14.2|protein-coding	3	57460
MEX3B|MEX-3B|RKHD3|RNF195|-|15q25.2|protein-coding	3	84206
WWP1|AIP5|Tiul1|hSDRP1|-|8q21.3|protein-coding	3	11059
SMOC1|OAS|-|14q24.2|protein-coding	3	64093
LOC100996351|-|-|19p13.3|ncRNA	3	100996351
THSD7A|-|-|7p21.3|protein-coding	3	221981
BMP2|BDA2|BMP2A|-|20p12.3|protein-coding	3	650
FAM78A|C9orf59|-|9q34.13|protein-coding	3	286336
CYP1A1|AHH|AHRR|CP11|CYP1|CYPIA1|P1-450|P450-C|P450DX|-|15q24.1|protein-coding	3	1543
SHROOM4|SHAP|-|Xp11.22|protein-coding	3	57477
LY75|CD205|CLEC13B|DEC-205|GP200-MR6|LY-75|-|2q24.2|protein-coding	3	4065
PALM|-|-|19p13.3|protein-coding	3	5064
LOC100506314|-|-|12p13.1|ncRNA	3	100506314
MFSD6|MMR2|hMMR2|-|2q32.2|protein-coding	3	54842
RINL|-|-|19q13.2|protein-coding	3	126432
LOC101927190|-|-|5q23.1|ncRNA	3	101927190
NUDT4P2|-|-|1q21.1|pseudo	3	170688
CNTNAP3P2|-|-|9q21.11|pseudo	3	643827
RAPGEF3|CAMP-GEFI|EPAC|EPAC1|HSU79275|bcm910|-|12q13.11|protein-coding	3	10411
PHLDB2|LL5b|LL5beta|-|3q13.2|protein-coding	3	90102
LAMA4|CMD1JJ|LAMA3|LAMA4*-1|-|6q21|protein-coding	3	3910
FCN3|FCNH|HAKA1|-|1p36.11|protein-coding	3	8547
C1orf115|-|-|1q41|protein-coding	3	79762
JPH3|CAGL237|HDL2|JP-3|JP3|TNRC22|-|16q24.2|protein-coding	3	57338
RALGDS|RGDS|RGF|RalGEF|-|9q34.13-q34.2|protein-coding	3	5900
KCNJ2-AS1|-|-|17q24.3|ncRNA	3	400617
HSPC324|-|-|9q34.3|ncRNA	3	101928612
HCG4B|HCG4P6|HCGIV-06|HCGIV-6|HCGIV.5|bCX67J3.3|bPG309N1.1|bQB90C11.3|-|6p22.1|ncRNA	3	80868
NUDT14|UGPP|UGPPase|-|14q32.33|protein-coding	3	256281
LRRC4|NAG14|NGL-2|-|7q32.1|protein-coding	3	64101
CCNJ|bA690P14.1|-|10q24.1|protein-coding	3	54619
NYNRIN|CGIN1|KIAA1305|-|14q12|protein-coding	3	57523
EPN3|-|-|17q21.33|protein-coding	3	55040
FRAT1|-|-|10q24.1|protein-coding	3	10023
TLL1|ASD6|TLL|-|4q32.3|protein-coding	3	7092
EXD3|mut-7|-|9q34.3|protein-coding	3	54932
FAM89A|C1orf153|-|1q42.2|protein-coding	3	375061
LRCH1|CHDC1|NP81|-|13q14.13-q14.2|protein-coding	3	23143
MAST4|-|-|5q12.3|protein-coding	3	375449
GSDMD|DF5L|DFNA5L|FKSG10|GSDMDC1|-|8q24.3|protein-coding	3	79792
PDGFB|IBGC5|PDGF-2|PDGF2|SIS|SSV|c-sis|-|22q13.1|protein-coding	3	5155
LOC441204|-|-|7p15.2|ncRNA	3	441204
KIAA1522|-|-|1p35.1|protein-coding	3	57648
LTB4R|BLT1|BLTR|CMKRL1|GPR16|LTB4R1|LTBR1|P2RY7|P2Y7|-|14q12|protein-coding	3	1241
IGFBP5|IBP5|-|2q35|protein-coding	3	3488
CNTNAP3B|-|-|9p11.2|protein-coding	3	728577
ASRGL1|ALP|ALP1|CRASH|-|11q12.3|protein-coding	3	80150
KLHL5|-|-|4p14|protein-coding	3	51088
UTRN|DMDL|DRP|DRP1|-|6q24.2|protein-coding	3	7402
SIN3B|-|-|19p13.11|protein-coding	3	23309
PALD1|KIAA1274|PALD|-|10q22.1|protein-coding	3	27143
MYZAP|GCOM1|Gup|MYOZAP|-|15q21.3|protein-coding	3	100820829
LOC554223|-|-|6p22.1|pseudo	3	554223
LIMK2|-|-|22q12.2|protein-coding	3	3985
TRIM47|GOA|RNF100|-|17q25.1|protein-coding	3	91107
LOC100128288|-|-|17p13.1|ncRNA	3	100128288
RPS6KL1|RSKL2|-|14q24.3|protein-coding	3	83694
EFEMP1|DHRD|DRAD|FBLN3|FBNL|FIBL-3|MLVT|MTLV|S1-5|-|2p16.1|protein-coding	3	2202
CHGA|CGA|-|14q32.12|protein-coding	3	1113
ARPP21|ARPP-21|R3HDM3|RCS|TARPP|-|3p22.3|protein-coding	3	10777
ALPK3|MAK|MIDORI|-|15q25.3|protein-coding	3	57538
LINC00926|-|-|15q21.3|ncRNA	3	283663
ZBTB46|BTBD4|BZEL|RINZF|ZNF340|dJ583P15.7|dJ583P15.8|-|20q13.33|protein-coding	3	140685
LINC01770|-|-|1p36.33|ncRNA	3	102724312
NFIB|CTF|HMGIC/NFIB|NF-I/B|NF1-B|NFI-B|NFI-RED|NFIB2|NFIB3|-|9p23-p22.3|protein-coding	3	4781
LOC101929340|-|-|11q24.2|ncRNA	3	101929340
TMEM102|CBAP|-|17p13.1|protein-coding	3	284114
PLXND1|PLEXD1|-|3q22.1|protein-coding	3	23129
FAM110D|GRRP1|-|1p36.11|protein-coding	3	79927
PEAR1|JEDI|MEGF12|-|1q23.1|protein-coding	2	375033
RASGRP3|GRP3|-|2p22.3|protein-coding	2	25780
ELMO3|CED-12|CED12|ELMO-3|-|16q22.1|protein-coding	2	79767
FGD5|ZFYVE23|-|3p25.1|protein-coding	2	152273
CMIP|TCMIP|-|16q23.2-q23.3|protein-coding	2	80790
C11orf80|TOP6BL|TOPOVIBL|-|11q13.2|protein-coding	2	79703
TTC29|NYD-SP14|TBPP2A|-|4q31.22|protein-coding	2	83894
TMEM155|-|-|4q27|protein-coding	2	132332
NRP2|NP2|NPN2|PRO2714|VEGF165R2|-|2q33.3|protein-coding	2	8828
MACF1|ABP620|ACF7|MACF|OFC4|-|1p34.3|protein-coding	2	23499
AP1B1|ADTB1|AP105A|BAM22|CLAPB2|-|22q12.2|protein-coding	2	162
CDYL2|PCCP1|-|16q23.2|protein-coding	2	124359
C3orf36|-|-|3q22.1|protein-coding	2	80111
CSF2RB|CD131|CDw131|IL3RB|IL5RB|SMDP5|-|22q12.3|protein-coding	2	1439
ADAMTS9|-|-|3p14.1|protein-coding	2	56999
TM4SF18|L6D|-|3q25.1|protein-coding	2	116441
SLCO2A1|MATR1|OATP2A1|PGT|PHOAR2|SLC21A2|-|3q22.1-q22.2|protein-coding	2	6578
PDCL|PhLP|-|9q33.2|protein-coding	2	5082
TBC1D9|GRAMD9|MDR1|-|4q31.21|protein-coding	2	23158
AFDN|AF6|MLL-AF6|MLLT4|-|6q27|protein-coding	2	4301
RELN|ETL7|LIS2|PRO1598|RL|-|7q22.1|protein-coding	2	5649
GBX2|-|-|2q37.2|protein-coding	2	2637
SERPINB9|CAP-3|CAP3|PI-9|PI9|-|6p25.2|protein-coding	2	5272
MYO10|-|-|5p15.1|protein-coding	2	4651
ADAM15|MDC15|-|1q21.3|protein-coding	2	8751
ENKUR|C10orf63|CFAP106|-|10p12.1|protein-coding	2	219670
BLK|MODY11|-|8p23.1|protein-coding	2	640
ATOH8|HATH6|bHLHa21|-|2p11.2|protein-coding	2	84913
PELI1|-|-|2p14|protein-coding	2	57162
NOSTRIN|DaIP2|-|2q24.3|protein-coding	2	115677
MBL1P|COLEC3P|MBL1P1|-|10q22.3|pseudo	2	8512
PITPNM2|NIR-3|NIR3|RDGB2|RDGBA2|-|12q24.31|protein-coding	2	57605
GALNT7|GALNAC-T7|GalNAcT7|-|4q34.1|protein-coding	2	51809
SNRK|HSNFRK|-|3p22.1|protein-coding	2	54861
GPAT3|AGPAT 10|AGPAT10|AGPAT8|AGPAT9|HMFN0839|LPAAT-theta|MAG1|-|4q21.23|protein-coding	2	84803
GLDC|GCE|GCSP|HYGN1|-|9p24.1|protein-coding	2	2731
CRYBB2|CCA2|CRYB2|CRYB2A|CTRCT3|D22S665|-|22q11.23|protein-coding	2	1415
NALCN|CLIFAHDD|CanIon|IHPRF|IHPRF1|INNFD|VGCNL1|bA430M15.1|-|13q32.3-q33.1|protein-coding	2	259232
FLOT2|ECS-1|ECS1|ESA|ESA1|M17S1|-|17q11.2|protein-coding	2	2319
SVIP|-|-|11p14.3|protein-coding	2	258010
SHROOM2|APXL|HSAPXL|-|Xp22.2|protein-coding	2	357
MATK|CHK|CTK|HHYLTK|HYL|HYLTK|Lsk|-|19p13.3|protein-coding	2	4145
LOC643733|-|-|11q22.3|pseudo	2	643733
HBEGF|DTR|DTS|DTSF|HEGFL|-|5q31.3|protein-coding	2	1839
PLCG1|NCKAP3|PLC-II|PLC1|PLC148|PLCgamma1|-|20q12|protein-coding	2	5335
HHIP-AS1|-|-|4q31.21|ncRNA	2	646576
MARK1|MARK|Par-1c|Par1c|-|1q41|protein-coding	2	4139
ITSN2|PRO2015|SH3D1B|SH3P18|SWA|SWAP|-|2p23.3|protein-coding	2	50618
CABLES1|CABL1|CABLES|HsT2563|IK3-1|-|18q11.2|protein-coding	2	91768
SORBS2|ARGBP2|PRO0618|-|4q35.1|protein-coding	2	8470
CARD10|BIMP1|CARMA3|-|22q13.1|protein-coding	2	29775
HTR1D|5-HT1D|HT1DA|HTR1DA|HTRL|RDC4|-|1p36.12|protein-coding	2	3352
STX3|STX3A|-|11q12.1|protein-coding	2	6809
CTSS|-|-|1q21.3|protein-coding	2	1520
B3GNT2|3-Gn-T1|3-Gn-T2|B3GN-T2|B3GNT|B3GNT-2|B3GNT1|BETA3GNT|BGNT2|BGnT-2|beta-1|beta3Gn-T1|beta3Gn-T2|-|2p15|protein-coding	2	10678
CRTAC1|ASPIC|ASPIC1|CEP-68|-|10q24.2|protein-coding	2	55118
UNC13B|MUNC13|UNC13|Unc13h2|-|9p13.3|protein-coding	2	10497
HPSE|HPA|HPA1|HPR1|HPSE1|HSE1|-|4q21.23|protein-coding	2	10855
TMEM233|DSPB2|IFITMD2|-|12q24.23|protein-coding	2	387890
HYAL1|HYAL-1|LUCA1|MPS9|NAT6|-|3p21.31|protein-coding	2	3373
HECW2|NEDL2|-|2q32.3|protein-coding	2	57520
SLC43A3|EEG1|FOAP-13|PRO1659|SEEEG-1|-|11q12.1|protein-coding	2	29015
SPTBN5|BSPECV|HUBSPECV|HUSPECV|-|15q15.1|protein-coding	2	51332
OCLN|BLCPMG|PPP1R115|-|5q13.2|protein-coding	2	100506658
AFAP1L1|-|-|5q32|protein-coding	2	134265
FLNB|ABP-278|ABP-280|AOI|FH1|FLN-B|FLN1L|LRS1|SCT|TABP|TAP|-|3p14.3|protein-coding	2	2317
AGPAT5|1AGPAT5|LPAATE|-|8p23.1|protein-coding	2	55326
SLC12A2|BSC|BSC2|NKCC1|PPP1R141|-|5q23.3|protein-coding	2	6558
TNFRSF1B|CD120b|TBPII|TNF-R-II|TNF-R75|TNFBR|TNFR1B|TNFR2|TNFR80|p75|p75TNFR|-|1p36.22|protein-coding	2	7133
FMNL3|FHOD3|FRL2|WBP-3|WBP3|-|12q13.12|protein-coding	2	91010
ARHGAP45|HA-1|HLA-HA1|HMHA1|-|19p13.3|protein-coding	2	23526
SHISA2|C13orf13|PRO28631|TMEM46|WGAR9166|bA398O19.2|hShisa|-|13q12.13|protein-coding	2	387914
ENG|END|HHT1|ORW1|-|9q34.11|protein-coding	2	2022
TCN2|D22S676|D22S750|II|TC|TC II|TC-2|TC2|TCII|-|22q12.2|protein-coding	2	6948
LAPTM5|CLAST6|-|1p35.2|protein-coding	2	7805
TNFAIP1|B12|B61|BTBD34|EDP1|hBACURD2|-|17q11.2|protein-coding	2	7126
LGALSL|GRP|HSPC159|-|2p14|protein-coding	2	29094
CMTM7|CKLFSF7|-|3p22.3|protein-coding	2	112616
KSR2|-|-|12q24.22-q24.23|protein-coding	2	283455
FLT1|FLT|FLT-1|VEGFR-1|VEGFR1|-|13q12.3|protein-coding	2	2321
HCLS1|CTTNL|HS1|lckBP1|p75|-|3q13.33|protein-coding	2	3059
CADPS2|CAPS2|-|7q31.32|protein-coding	2	93664
TPK1|HTPK1|PP20|THMD5|-|7q35|protein-coding	2	27010
C15orf54|-|-|15q14|ncRNA	2	400360
DOCK9|ZIZ1|ZIZIMIN1|-|13q32.3|protein-coding	2	23348
CARD16|COP|COP1|PSEUDO-ICE|-|11q22.3|protein-coding	2	114769
UVRAG|DHTX|VPS38|p63|-|11q13.5|protein-coding	2	7405
DNASE1L3|DHP2|DNAS1L3|LSD|SLEB16|-|3p14.3|protein-coding	2	1776
CPNE8|-|-|12q12|protein-coding	2	144402
MFAP3|-|-|5q33.2|protein-coding	2	4238
TM6SF1|-|-|15q25.2|protein-coding	2	53346
SLAIN1|C13orf32|-|13q22.3|protein-coding	2	122060
STYK1|NOK|SuRTK106|-|12p13.2|protein-coding	2	55359
PIR|-|-|Xp22.2|protein-coding	2	8544
RBMS2|SCR3|-|12q13.3|protein-coding	2	5939
PON2|-|-|7q21.3|protein-coding	2	5445
RASGRP2|CALDAG-GEFI|CDC25L|-|11q13.1|protein-coding	2	10235
ERP27|C12orf46|PDIA8|-|12p12.3|protein-coding	2	121506
IL4R|CD124|IL-4RA|IL4RA|-|16p12.1|protein-coding	2	3566
TEK|CD202B|TIE-2|TIE2|VMCM|VMCM1|-|9p21.2|protein-coding	2	7010
DOCK4|-|-|7q31.1|protein-coding	2	9732
RASGRF2|GRF2|RAS-GRF2|-|5q14.1|protein-coding	2	5924
FGD4|CMT4H|FRABP|ZFYVE6|-|12p11.21|protein-coding	2	121512
CPNE2|COPN2|CPN2|-|16q13|protein-coding	2	221184
HOXB7|HHO.C1|HOX2|HOX2C|Hox-2.3|-|17q21.32|protein-coding	2	3217
DGKH|DGKeta|-|13q14.11|protein-coding	2	160851
LRRC8C|AD158|FAD158|-|1p22.2|protein-coding	2	84230
TTC9|TTC9A|-|14q24.2|protein-coding	2	23508
CDH5|7B4|CD144|-|16q21|protein-coding	2	1003
GIMAP8|IAN-9|IAN6|IAN9|IANT|-|7q36.1|protein-coding	2	155038
F2RL1|GPR11|PAR2|-|5q13.3|protein-coding	2	2150
TMEM206|C1orf75|-|1q32.3|protein-coding	2	55248
TRIM16|EBBP|-|17p12|protein-coding	2	10626
NFKBIE|IKBE|-|6p21.1|protein-coding	2	4794
HHEX|HEX|HMPH|HOX11L-PEN|PRH|PRHX|-|10q23.33|protein-coding	2	3087
MAP3K11|MEKK11|MLK-3|MLK3|PTK1|SPRK|-|11q13.1|protein-coding	2	4296
RPS6KA1|HU-1|MAPKAPK1A|RSK|RSK1|p90Rsk|-|1p36.11|protein-coding	2	6195
VSIG1|1700062D20Rik|GPA34|dJ889N15.1|-|Xq22.3|protein-coding	2	340547
FABP4|A-FABP|AFABP|ALBP|HEL-S-104|aP2|-|8q21.13|protein-coding	2	2167
EGFL7|NEU1|VE-STATIN|ZNEU1|-|9q34.3|protein-coding	2	51162
PPARGC1B|ERRL1|PERC|PGC-1(beta)|PGC1B|-|5q32|protein-coding	2	133522
ZDHHC13|HIP14L|HIP3RP|-|11p15.1|protein-coding	2	54503
AGMO|TMEM195|-|7p21.2|protein-coding	2	392636
LYN|JTK8|p53Lyn|p56Lyn|-|8q12.1|protein-coding	2	4067
KIAA1462|JCAD|-|10p11.23|protein-coding	2	57608
ZSCAN2|ZFP29|ZNF854|-|15q25.2|protein-coding	2	54993
UBXN2B|p37|-|8q12.1|protein-coding	2	137886
GNAI2|GIP|GNAI2B|H_LUCA15.1|H_LUCA16.1|-|3p21.31|protein-coding	2	2771
PKIA|PRKACN1|-|8q21.13|protein-coding	2	5569
AFF1|AF4|MLLT2|PBM1|-|4q21.3-q22.1|protein-coding	2	4299
ST6GAL1|SIAT1|ST6GalI|ST6N|-|3q27.3|protein-coding	2	6480
XPO4|exp4|-|13q12.11|protein-coding	2	64328
SH3TC2|CMT4C|MNMN|-|5q32|protein-coding	2	79628
GIMAP1-GIMAP5|-|-|7q36.1|protein-coding	2	100527949
ROPN1L|ASP|RSPH11|-|5p15.2|protein-coding	2	83853
BATF|B-ATF|BATF1|SFA-2|SFA2|-|14q24.3|protein-coding	2	10538
HS6ST3|HS6ST-3|-|13q32.1|protein-coding	2	266722
ARHGEF28|RGNEF|RIP2|p190RHOGEF|-|5q13.2|protein-coding	2	64283
BEAN1|BEAN|SCA31|-|16q21|protein-coding	2	146227
EPHB2|CAPB|DRT|EK5|EPHT3|ERK|Hek5|PCBC|Tyro5|-|1p36.12|protein-coding	2	2048
LRRC37A2|LRRC37|-|17q21.31|protein-coding	2	474170
DENND3|-|-|8q24.3|protein-coding	2	22898
SLC25A13|ARALAR2|CITRIN|CTLN2|-|7q21.3|protein-coding	2	10165
FZD4|CD344|EVR1|FEVR|FZD4S|Fz-4|Fz4|FzE4|GPCR|hFz4|-|11q14.2|protein-coding	2	8322
LBR|DHCR14B|LMN2R|PHA|TDRD18|-|1q42.12|protein-coding	2	3930
VAV3|-|-|1p13.3|protein-coding	2	10451
NTN4|PRO3091|-|12q22|protein-coding	2	59277
TCTEX1D1|-|-|1p31.3|protein-coding	2	200132
IPO11-LRRC70|-|-|5q12.1|ncRNA	2	101180901
SEC14L1|PRELID4A|SEC14L|-|17q25.2-q25.3|protein-coding	2	6397
LOC254896|-|-|8p21.3|ncRNA	2	254896
PAWR|PAR4|Par-4|-|12q21.2|protein-coding	2	5074
LIPG|EDL|EL|PRO719|-|18q21.1|protein-coding	2	9388
TACC2|AZU-1|ECTACC|-|10q26.13|protein-coding	2	10579
ARHGDIB|D4|GDIA2|GDID4|LYGDI|Ly-GDI|RAP1GN1|RhoGDI2|-|12p12.3|protein-coding	2	397
ANGPT2|AGPT2|ANG2|-|8p23.1|protein-coding	2	285
PLD1|-|-|3q26.31|protein-coding	2	5337
SYT14|SCAR11|sytXIV|-|1q32.2|protein-coding	2	255928
CEACAM1|BGP|BGP1|BGPI|-|19q13.2|protein-coding	2	634
GNG11|GNGT11|-|7q21.3|protein-coding	2	2791
CRHR1-IT1-CRHR1|MGC57346-CRHR1|-|17q21.31|protein-coding	2	104909134
SLC8B1|NCKX6|NCLX|SLC24A6|-|12q24.13|protein-coding	2	80024
FAM107B|C10orf45|HITS|-|10p13|protein-coding	2	83641
SLC18B1|C6orf192|dJ55C23.6|-|6q23.2|protein-coding	2	116843
TEAD4|EFTR-2|RTEF1|TCF13L1|TEF-3|TEF3|TEFR-1|hRTEF-1B|-|12p13.33|protein-coding	2	7004
PROCR|CCCA|CCD41|EPCR|-|20q11.22|protein-coding	2	10544
SUSD5|-|-|3p22.3|protein-coding	2	26032
TMEM2|-|-|9q21.13|protein-coding	2	23670
PKN3|UTDP4-1|-|9q34.11|protein-coding	2	29941
RHOBTB1|-|-|10q21.2|protein-coding	2	9886
PLA2G16|AdPLA|H-REV107-1|HRASLS3|HREV107|HREV107-1|HREV107-3|HRSL3|-|11q12.3-q13.1|protein-coding	2	11145
SLC16A13|MCT13|-|17p13.1|protein-coding	2	201232
RNF152|-|-|18q21.33|protein-coding	2	220441
JAK1|JAK1A|JAK1B|JTK3|-|1p31.3|protein-coding	2	3716
TCF4|E2-2|FECD3|ITF-2|ITF2|PTHS|SEF-2|SEF2|SEF2-1|SEF2-1A|SEF2-1B|SEF2-1D|TCF-4|bHLHb19|-|18q21.2|protein-coding	2	6925
GIMAP6|IAN-2|IAN-6|IAN2|IAN6|-|7q36.1|protein-coding	2	474344
CBWD5|DC36|-|9q21.11|protein-coding	2	220869
NLK|-|-|17q11.2|protein-coding	2	51701
GPSM3|AGS4|C6orf9|G18|G18.1a|G18.1b|G18.2|NG1|-|6p21.32|protein-coding	2	63940
EVI2B|CD361|D17S376|EVDB|-|17q11.2|protein-coding	2	2124
PPP1R9A|NRB1|NRBI|Neurabin-I|-|7q21.3|protein-coding	2	55607
PRR29|C17orf72|-|17q23.3|protein-coding	2	92340
TSPAN14|DC-TM4F2|TM4SF14|-|10q23.1|protein-coding	2	81619
ESM1|endocan|-|5q11.2|protein-coding	2	11082
ATG4A|APG4A|AUTL2|-|Xq22.3|protein-coding	2	115201
PCSK6|PACE4|SPC4|-|15q26.3|protein-coding	2	5046
USP18|ISG43|UBP43|-|22q11.21|protein-coding	2	11274
PIR-FIGF|-|-|Xp22.2|ncRNA	2	100532742
PRKCQ-AS1|-|-|10p15.1|ncRNA	2	439949
LOC441178|-|-|6q27|ncRNA	2	441178
FMNL1|C17orf1|C17orf1B|FHOD4|FMNL|KW-13|-|17q21.31|protein-coding	2	752
LINC00888|-|-|3q27.1|ncRNA	2	100505687
FZD5|C2orf31|HFZ5|-|2q33.3|protein-coding	2	7855
TLR1|CD281|TIL|TIL. LPRS5|rsc786|-|4p14|protein-coding	2	7096
KIAA0355|-|-|19q13.11|protein-coding	2	9710
APBA2|D15S1518E|HsT16821|LIN-10|MGC:14091|MINT2|X11-BETA|X11L|-|15q13.1|protein-coding	2	321
EXOC3L1|EXOC3L|-|16q22.1|protein-coding	2	283849
GIMAP5|HIMAP3|IAN-5|IAN4|IAN4L1|IAN5|IMAP3|IROD|-|7q36.1|protein-coding	2	55340
TET3|hCG_40738|-|2p13.1|protein-coding	2	200424
ITGA6|CD49f|ITGA6B|VLA-6|-|2q31.1|protein-coding	2	3655
PNP|NP|PRO1837|PUNP|-|14q11.2|protein-coding	2	4860
C7orf61|-|-|7q22.1|protein-coding	2	402573
NHSL1|C6orf63|-|6q24.1|protein-coding	2	57224
PLK2|SNK|hPlk2|hSNK|-|5q11.2|protein-coding	2	10769
MPDZ|HYC2|MUPP1|-|9p23|protein-coding	2	8777
KRT18|CK-18|CYK18|K18|-|12q13.13|protein-coding	2	3875
PODXL|Gp200|PC|PCLP|PCLP-1|-|7q32.3|protein-coding	2	5420
ADGRL4|ELTD1|ETL|KPG_003|-|1p31.1|protein-coding	2	64123
AKTIP|FT1|FTS|-|16q12.2|protein-coding	2	64400
ARL11|ARLTS1|-|13q14.2|protein-coding	2	115761
KIAA1324L|EIG121L|-|7q21.12|protein-coding	2	222223
GATA2-AS1|-|-|3q21.3|ncRNA	2	101927167
TJP2|C9DUPq21.11|DFNA51|DUP9q21.11|PFIC4|X104|ZO2|-|9q21.11|protein-coding	2	9414
FAM49A|-|-|2p24.2|protein-coding	2	81553
EDN1|ARCND3|ET1|HDLCQ7|PPET1|QME|-|6p24.1|protein-coding	2	1906
RAVER2|-|-|1p31.3|protein-coding	2	55225
GALNT1|GALNAC-T1|-|18q12.2|protein-coding	2	2589
SPP1|BNSP|BSPI|ETA-1|OPN|-|4q22.1|protein-coding	2	6696
PHACTR1|RPEL|RPEL1|dJ257A7.2|-|6p24.1|protein-coding	2	221692
ZNF860|-|-|3p23-p22.3|protein-coding	2	344787
CRHR1-IT1|C17orf69|MGC57346|-|17q21.31|ncRNA	2	147081
ADGRG6|APG1|DREG|GPR126|LCCS9|PR126|PS1TP2|VIGR|-|6q24.2|protein-coding	2	57211
ZNF704|Gig1|-|8q21.13|protein-coding	2	619279
ACVRL1|ACVRLK1|ALK-1|ALK1|HHT|HHT2|ORW2|SKR3|TSR-I|-|12q13.13|protein-coding	2	94
TNFRSF10A|APO2|CD261|DR4|TRAILR-1|TRAILR1|-|8p21.3|protein-coding	2	8797
IL27RA|CRL1|IL-27RA|IL27R|TCCR|WSX1|zcytor1|-|19p13.12|protein-coding	2	9466
HYAL2|LUCA2|-|3p21.31|protein-coding	2	8692
PLCL1|PLCE|PLCL|PLDL1|PPP1R127|PRIP|-|2q33.1|protein-coding	2	5334
HTR1B|5-HT-1B|5-HT-1D-beta|5-HT1B|5-HT1DB|HTR1D2|HTR1DB|S12|-|6q14.1|protein-coding	2	3351
UCP2|BMIQ4|SLC25A8|UCPH|-|11q13.4|protein-coding	2	7351
PREX1|P-REX1|-|20q13.13|protein-coding	2	57580
NR3C2|MCR|MLR|MR|NR3C2VIT|-|4q31.23|protein-coding	2	4306
FRMD5|-|-|15q15.3|protein-coding	2	84978
NRROS|ELLP3030|GARPL1|LRRC33|UNQ3030|-|3q29|protein-coding	2	375387
SYNM|DMN|SYN|-|15q26.3|protein-coding	2	23336
ECSCR|ARIA|ECSM2|-|5q31.2|protein-coding	2	641700
TDRKH|TDRD2|-|1q21.3|protein-coding	2	11022
DOCK8|HEL-205|MRD2|ZIR8|-|9p24.3|protein-coding	2	81704
WDFY4|C10orf64|-|10q11.23|protein-coding	2	57705
HERC1|MDFPMR|p532|p619|-|15q22.31|protein-coding	2	8925
TANC1|ROLSB|TANC|-|2q24.2|protein-coding	2	85461
NIPSNAP3B|FP944|NIPSNAP3|SNAP1|-|9q31.1|protein-coding	2	55335
TFEC|TCFEC|TFE-C|TFEC-L|TFECL|bHLHe34|hTFEC-L|-|7q31.2|protein-coding	2	22797
HLA-L|HLA-92|HLA92|HLAL|-|6p22.1|pseudo	2	3139
EPHA2|ARCC2|CTPA|CTPP1|CTRCT6|ECK|-|1p36.13|protein-coding	2	1969
LOC100507006|-|-|2p14|ncRNA	2	100507006
ARHGAP31|AOS1|CDGAP|-|3q13.32-q13.33|protein-coding	2	57514
MTSS1|MIM|MIMA|MIMB|-|8q24.13|protein-coding	2	9788
RNF144B|IBRDC2|PIR2|bA528A10.3|p53RFP|-|6p22.3|protein-coding	2	255488
GNGT2|G-GAMMA-8|G-GAMMA-C|GNG8|GNG9|GNGT8|-|17q21.32|protein-coding	2	2793
EPB41|4.1R|EL1|HE|-|1p35.3|protein-coding	2	2035
SEMA4D|C9orf164|CD100|M-sema-G|SEMAJ|coll-4|-|9q22.2|protein-coding	2	10507
HOPX|CAMEO|HOD|HOP|LAGY|NECC1|OB1|SMAP31|TOTO|-|4q12|protein-coding	2	84525
TGFBR2|AAT3|FAA3|LDS1B|LDS2|LDS2B|MFS2|RIIC|TAAD2|TGFR-2|TGFbeta-RII|-|3p24.1|protein-coding	2	7048
ZNF366|DCSCRIPT|-|5q13.2|5q13.2|protein-coding	2	167465
METTL4|HsT661|-|18p11.32|protein-coding	2	64863
GAS2L3|G2L3|-|12q23.1|protein-coding	2	283431
USP54|C10orf29|bA137L10.3|bA137L10.4|-|10q22.2|protein-coding	2	159195
DHX32|DDX32|DHLP1|-|10q26.2|protein-coding	2	55760
GIMAP4|IAN-1|IAN1|IMAP4|MSTP062|-|7q36.1|protein-coding	2	55303
TMEM37|PR|PR1|-|2q14.2|protein-coding	2	140738
LINC00961|SPAR|-|9p13.3|ncRNA	2	158376
LRP5L|-|-|22q11.23|protein-coding	2	91355
NEDD9|CAS-L|CAS2|CASL|CASS2|HEF1|-|6p24.2|protein-coding	2	4739
SYTL4|SLP4|-|Xq22.1|protein-coding	2	94121
CALM1|CALML2|CAMI|CPVT4|DD132|LQT14|PHKD|caM|-|14q32.11|protein-coding	2	801
EHD4|PAST4|-|15q15.1|protein-coding	2	30844
ST3GAL5|SATI|SIAT9|SIATGM3S|SPDRS|ST3GalV|-|2p11.2|protein-coding	2	8869
RANBP17|-|-|5q35.1|protein-coding	2	64901
TM7SF2|ANG1|DHCR14A|NET47|-|11q13.1|protein-coding	2	7108
SLC45A3|IPCA-2|IPCA-6|IPCA-8|IPCA6|PCANAP2|PCANAP6|PCANAP8|PRST|-|1q32.1|protein-coding	2	85414
CARD8-AS1|-|-|19q13.33|ncRNA	2	100505812
ADGRG1|BFPP|BPPR|GPR56|TM7LN4|TM7XN1|-|16q21|protein-coding	2	9289
LRRC32|D11S833E|GARP|-|11q13.5|protein-coding	2	2615
VSIG10|-|-|12q24.23|protein-coding	2	54621
RPS6KA2-IT1|-|-|6q27|ncRNA	2	100874353
LMBR1|ACHP|C7orf2|DIF14|LSS|PPD2|THYP|TPT|ZRS|-|7q36.3|protein-coding	2	64327
TMEM51|C1orf72|-|1p36.21|protein-coding	2	55092
TGFBRAP1|TRAP-1|TRAP1|VPS3|-|2q12.1-q12.2|protein-coding	2	9392
HAGLR|HOXD-AS1|Mdgt|-|2q31.1|ncRNA	2	401022
MAP4K2|BL44|GCK|RAB8IP|-|11q13.1|protein-coding	2	5871
CTNNBIP1|ICAT|-|1p36.22|protein-coding	2	56998
HLA-DPA1|DP(W3)|DP(W4)|HLA-DP1A|HLADP|HLASB|PLT1|-|6p21.32|protein-coding	2	3113
ENTPD1|ATPDase|CD39|NTPDase-1|SPG64|-|10q24.1|protein-coding	2	953
C16orf74|-|-|16q24.1|protein-coding	2	404550
GLYCTK|HBEBP2|HBEBP4|HBeAgBP4A|-|3p21.2|protein-coding	2	132158
TSHZ1|CAA|NY-CO-33|SDCCAG33|TSH1|-|18q22.3|protein-coding	2	10194
ZNF33B|KOX2|KOX31|ZNF11B|-|10q11.21|protein-coding	2	7582
ACRBP|CT23|OY-TES-1|SP32|-|12p13.31|protein-coding	2	84519
PPM1F|CAMKP|CaMKPase|FEM-2|POPX2|hFEM-2|-|22q11.22|protein-coding	2	9647
CARD6|CINCIN1|-|5p13.1|protein-coding	2	84674
IL32|IL-32alpha|IL-32beta|IL-32delta|IL-32gamma|NK4|TAIF|TAIFa|TAIFb|TAIFc|TAIFd|-|16p13.3|protein-coding	2	9235
PRTG|IGDCC5|-|15q21.3|protein-coding	2	283659
PLXNA2|OCT|PLXN2|-|1q32.2|protein-coding	2	5362
KALRN|ARHGEF24|CHD5|CHDS5|DUET|DUO|HAPIP|TRAD|-|3q21.1-q21.2|protein-coding	2	8997
ABI3|NESH|SSH3BP3|-|17q21.32|protein-coding	2	51225
MEOX2-AS1|-|-|7p21.2|ncRNA	2	101927524
MMP16|C8orf57|MMP-X2|MT-MMP2|MT-MMP3|MT3-MMP|-|8q21.3|protein-coding	2	4325
EPS8L1|DRC3|EPS8R1|PP10566|-|19q13.42|protein-coding	2	54869
FAM212A|C3orf54|INKA1|-|3p21.31|protein-coding	2	389119
ATP13A2|CLN12|HSA9947|KRPPD|PARK9|-|1p36.13|protein-coding	2	23400
TAL1|SCL|TCL5|bHLHa17|tal-1|-|1p33|protein-coding	2	6886
ZNF280B|5'OY11.1|D87009.C22.3|SUHW2|ZNF279|ZNF632|-|22q11.22|protein-coding	2	140883
FAR2|HEL-S-81|MLSTD1|SDR10E2|-|12p11.22|protein-coding	2	55711
ABCC2|ABC30|CMOAT|DJS|MRP2|cMRP|-|10q24.2|protein-coding	2	1244
PRKAR2B|PRKAR2|RII-BETA|-|7q22.3|protein-coding	2	5577
MAPK11|P38B|P38BETA2|PRKM11|SAPK2|SAPK2B|p38-2|p38Beta|-|22q13.33|protein-coding	2	5600
MYCT1|MTLC|-|6q25.2|protein-coding	2	80177
CRY1|PHLL1|-|12q23.3|protein-coding	2	1407
NAMPT|1110035O14Rik|PBEF|PBEF1|VF|VISFATIN|-|7q22.3|protein-coding	2	10135
THEM6|C8orf55|DSCD75|-|8q24.3|protein-coding	2	51337
CTGF|CCN2|HCS24|IGFBP8|NOV2|-|6q23.2|protein-coding	2	1490
GMFG|GMF-GAMMA|-|19q13.2|protein-coding	2	9535
ESAM|W117m|-|11q24.2|protein-coding	2	90952
TNFRSF10C|CD263|DCR1|DCR1-TNFR|LIT|TRAIL-R3|TRAILR3|TRID|-|8p21.3|protein-coding	2	8794
GPR4|-|-|19q13.32|protein-coding	2	2828
GATA2|DCML|IMD21|MONOMAC|NFE1B|-|3q21.3|protein-coding	2	2624
COL4A6|CXDELq22.3|DELXq22.3|DFNX6|-|Xq22.3|protein-coding	2	1288
COL4A5|ASLN|ATS|CA54|-|Xq22.3|protein-coding	2	1287
THSD4|ADAMTSL-6|ADAMTSL6|FVSY9334|PRO34005|-|15q23|protein-coding	2	79875
ARRB2|ARB2|ARR2|BARR2|-|17p13.2|protein-coding	2	409
NRGN|RC3|hng|-|11q24.2|protein-coding	2	4900
HSD17B2|EDH17B2|HSD17|SDR9C2|-|16q23.3|protein-coding	2	3294
CD9|BTCC-1|DRAP-27|MIC3|MRP-1|TSPAN-29|TSPAN29|-|12p13.31|protein-coding	2	928
EXOC6|EXOC6A|SEC15|SEC15L|SEC15L1|SEC15L3|Sec15p|-|10q23.33|protein-coding	2	54536
KDR|CD309|FLK1|VEGFR|VEGFR2|-|4q12|protein-coding	2	3791
DISP2|DISPB|HsT16908|LINC00594|-|15q15.1|protein-coding	2	85455
OGFRL1|dJ331H24.1|-|6q13|protein-coding	2	79627
MARCH3|MARCH-III|RNF173|-|5q23.2|protein-coding	2	115123
NR5A2|B1F|B1F2|CPF|FTF|FTZ-F1|FTZ-F1beta|LRH-1|LRH1|hB1F-2|-|1q32.1|protein-coding	2	2494
RASSF3|RASSF5|-|12q14.2|protein-coding	2	283349
PFKFB3|IPFK2|PFK2|iPFK-2|-|10p15.1|protein-coding	2	5209
SDPR|CAVIN2|PS-p68|SDR|cavin-2|-|2q32.3|protein-coding	2	8436
LOC101928304|-|-|6q23.2|ncRNA	2	101928304
MYLK2|KMLC|MLCK|MLCK2|skMLCK|-|20q11.21|protein-coding	2	85366
MAP3K3|MAPKKK3|MEKK3|-|17q23.3|protein-coding	2	4215
CALCRL|CGRPR|CRLR|-|2q32.1|protein-coding	2	10203
ZFPM2|DIH3|FOG2|SRXY9|ZC2HC11B|ZNF89B|hFOG-2|-|8q23.1|protein-coding	2	23414
FLI1|EWSR2|SIC-1|-|11q24.3|protein-coding	2	2313
GOLGA8H|GOLGA6L11|-|15q13.2|protein-coding	2	728498
LINC00704|-|-|10p15.1|ncRNA	2	100216001
SYNE2|EDMD5|NUA|NUANCE|Nesp2|Nesprin-2|SYNE-2|TROPH|-|14q23.2|protein-coding	2	23224
GLCE|HSEPI|-|15q23|protein-coding	2	26035
KLHL2|ABP-KELCH|MAV|MAYVEN|-|4q32.3|protein-coding	2	11275
ROBO4|ECSM4|MRB|-|11q24.2|protein-coding	2	54538
HERC6|-|-|4q22.1|protein-coding	2	55008
HHIP|HIP|-|4q31.21|protein-coding	2	64399
KIAA0922|TMEM131L|-|4q31.3|protein-coding	2	23240
SYT9|-|-|11p15.4|protein-coding	2	143425
THBD|AHUS6|BDCA3|CD141|THPH12|THRM|TM|-|20p11.21|protein-coding	2	7056
MAML3|CAGH3|ERDA3|GDN|MAM-2|MAM2|TNRC3|-|4q31.1|protein-coding	2	55534
STARD8|ARHGAP38|DLC3|STARTGAP3|-|Xq13.1|protein-coding	2	9754
TM4SF1|H-L6|L6|M3S1|TAAL6|-|3q25.1|protein-coding	2	4071
INO80C|C18orf37|IES6|hIes6|-|18q12.2|protein-coding	2	125476
MFNG|-|-|22q13.1|protein-coding	2	4242
TMEM255B|FAM70B|-|13q34|protein-coding	2	348013
ARL15|ARFRP2|-|5q11.2|protein-coding	2	54622
DGKZ|DAGK5|DAGK6|DGK-ZETA|hDGKzeta|-|11p11.2|protein-coding	2	8525
MTMR12|3-PAP|PIP3AP|-|5p13.3|protein-coding	2	54545
TMEM163|DC29|SV31|-|2q21.3|protein-coding	2	81615
TMEM44|-|-|3q29|protein-coding	2	93109
ECE1|ECE|-|1p36.12|protein-coding	2	1889
PCDH10|OL-PCDH|PCDH19|-|4q28.3|protein-coding	2	57575
RHEBL1|RHEBL1c|-|12q13.12|protein-coding	2	121268
SLCO4A1|OATP-E|OATP1|OATP4A1|OATPE|OATPRP1|POAT|SLC21A12|-|20q13.33|protein-coding	2	28231
CEACAM21|CEACAM3|R29124_1|-|19q13.2|protein-coding	2	90273
RCSD1|CAPZIP|MK2S4|-|1q24.2|protein-coding	2	92241
COL17A1|BA16H23.2|BP180|BPA-2|BPAG2|ERED|LAD-1|-|10q25.1|protein-coding	2	1308
MRC1|CD206|CLEC13D|CLEC13DL|MMR|MRC1L1|bA541I19.1|hMR|-|10p12.33|protein-coding	2	4360
OSBP2|HLM|ORP-4|ORP4|OSBPL1|OSBPL4|-|22q12.2|protein-coding	2	23762
FAM213B|C1orf93|-|1p36.32|protein-coding	2	127281
RENBP|RBP|RNBP|-|Xq28|protein-coding	2	5973
GRAP2|GADS|GRAP-2|GRB2L|GRBLG|GRID|GRPL|GrbX|Grf40|Mona|P38|-|22q13.1|protein-coding	2	9402
PLCXD2|-|-|3q13.2|protein-coding	2	257068
MEOX2|GAX|MOX2|-|7p21.2|protein-coding	2	4223
ZNF625|-|-|19p13.2|protein-coding	2	90589
HYI|HT036|-|1p34.2|protein-coding	2	81888
MGAT5|GNT-V|GNT-VA|-|2q21.2-q21.3|protein-coding	2	4249
CNKSR3|MAGI1|-|6q25.2|protein-coding	2	154043
NMI|-|-|2q23.3|protein-coding	2	9111
SLC29A1|ENT1|-|6p21.1|protein-coding	2	2030
FES|FPS|-|15q26.1|protein-coding	2	2242
OSBPL10|ORP10|OSBP9|-|3p23|protein-coding	2	114884
PLEKHA1|TAPP1|-|10q26.13|protein-coding	2	59338
ARAP3|CENTD3|DRAG1|-|5q31.3|protein-coding	2	64411
GREB1L|C18orf6|KIAA1772|-|18q11.1-q11.2|protein-coding	2	80000
RPGR|COD1|CORDX1|CRD|PCDX|RP15|RP3|XLRP3|orf15|-|Xp11.4|protein-coding	2	6103
CSF2|GMCSF|-|5q31.1|protein-coding	2	1437
LINC01215|-|-|3q13.12|ncRNA	2	101929623
B3GNT5|B3GN-T5|beta3Gn-T5|-|3q27.1|protein-coding	2	84002
B4GALT6|B4Gal-T6|beta4Gal-T6|-|18q12.1|protein-coding	2	9331
GPR143|NYS6|OA1|-|Xp22.2|protein-coding	2	4935
NECTIN2|CD112|HVEB|PRR2|PVRL2|PVRR2|-|19q13.32|protein-coding	2	5819
SCN3B|ATFB16|BRGDA7|HSA243396|SCNB3|-|11q24.1|protein-coding	2	55800
BOK|BCL2L9|BOKL|-|2q37.3|protein-coding	2	666
GULP1|CED-6|CED6|GULP|-|2q32.1-q32.2|protein-coding	2	51454
SEMA3D|Sema-Z2|coll-2|-|7q21.11|protein-coding	2	223117
BEND6|C6orf65|-|6p12.1|protein-coding	1	221336
DIRAS3|ARHI|NOEY2|-|1p31.3|protein-coding	1	9077
KRT15|CK15|K15|K1CO|-|17q21.2|protein-coding	1	3866
PCBP3|ALPHA-CP3|-|21q22.3|protein-coding	1	54039
NTM|HNT|IGLON2|NTRI|-|11q25|protein-coding	1	50863
HOXB-AS1|-|-|17q21.32|ncRNA	1	100874362
B4GALT1-AS1|-|-|9p21.1|ncRNA	1	101929639
MRGPRF|GPR140|GPR168|MRGF|RTA|-|11q13.3|protein-coding	1	116535
TYMSOS|C18orf56|-|18p11.32|protein-coding	1	494514
GCSH|GCE|NKH|-|16q23.2|protein-coding	1	2653
RBPMS-AS1|-|-|8p12|ncRNA	1	100128750
TMEM54|BCLP|CAC-1|CAC1|-|1p35.1|protein-coding	1	113452
FAM167A|C8orf13|D8S265|-|8p23.1|protein-coding	1	83648
NRG1|ARIA|GGF|GGF2|HGL|HRG|HRG1|HRGA|MST131|MSTP131|NDF|NRG1-IT2|SMDF|-|8p12|protein-coding	1	3084
VGLL3|VGL-3|VGL3|-|3p12.1|protein-coding	1	389136
UBASH3B|STS-1|STS1|TULA-2|TULA2|p70|-|11q24.1|protein-coding	1	84959
CDH4|CAD4|R-CAD|RCAD|-|20q13.33|protein-coding	1	1002
TWIST1|ACS3|BPES2|BPES3|CRS|CRS1|CSO|SCS|TWIST|bHLHa38|-|7p21.1|protein-coding	1	7291
C12orf56|-|-|12q14.2|protein-coding	1	115749
LINC00941|-|-|12p11.21|ncRNA	1	100287314
KRTAP2-3|KAP2.3|KRTAP2.3|-|17q21.2|protein-coding	1	730755
MGST1|GST12|MGST|MGST-I|-|12p12.3|protein-coding	1	4257
ATP1A1-AS1|ATP1A1OS|C1orf203|-|1p13.1|ncRNA	1	84852
C17orf82|-|-|17q23.2|protein-coding	1	388407
VASN|SLITL2|-|16p13.3|protein-coding	1	114990
A1BG|A1B|ABG|GAB|HYST2477|-|19q13.43|protein-coding	1	1
CATSPER2P1|-|-|15q15.3|pseudo	1	440278
LINC01060|-|-|4q35.2|ncRNA	1	401164
C7orf73|PL-5283|-|7q33|protein-coding	1	647087
HMGA2|BABL|HMGI-C|HMGIC|LIPO|STQTL9|-|12q14.3|protein-coding	1	8091
SCUBE3|CEGF3|-|6p21.31|protein-coding	1	222663
LOC100506083|-|-|16q22.1|ncRNA	1	100506083
TGFBR3L|TGFR-3L|-|19p13.2|protein-coding	1	100507588
LOC101928143|-|-|14q24.3|ncRNA	1	101928143
VEGFC|Flt4-L|LMPH1D|VRP|-|4q34.3|protein-coding	1	7424
SNAI2|SLUG|SLUGH|SLUGH1|SNAIL2|WS2D|-|8q11.21|protein-coding	1	6591
NRN1|NRN|dJ380B8.2|-|6p25.1|protein-coding	1	51299
IL1R2|CD121b|CDw121b|IL-1R-2|IL-1RT-2|IL-1RT2|IL1R2c|IL1RB|-|2q11.2|protein-coding	1	7850
HAS2|-|-|8q24.13|protein-coding	1	3037
CDX1|-|-|5q32|protein-coding	1	1044
KIRREL3|KIRRE|MRD4|NEPH2|PRO4502|-|11q24.2|protein-coding	1	84623
LINC00460|-|-|13q33.2|ncRNA	1	728192
HOMER2|ACPD|CPD|DFNA68|HOMER-2|VESL-2|-|15q25.2|protein-coding	1	9455
TBX18|CAKUT2|-|6q14.3|protein-coding	1	9096
GLIPR1|CRISP7|GLIPR|RTVP1|-|12q21.2|protein-coding	1	11010
S100A6|2A9|5B10|CABP|CACY|PRA|-|1q21.3|protein-coding	1	6277
DCBLD2|CLCP1|ESDN|-|3q12.1|3|protein-coding	1	131566
ELFN1|PPP1R28|-|7p22.3|protein-coding	1	392617
MT1X|MT-1l|MT1|-|16q13|protein-coding	1	4501
CSDC2|PIPPIN|dJ347H13.2|-|22q13.2|protein-coding	1	27254
PTPRQ|DFNB84|DFNB84A|PTPGMC1|R-PTP-Q|-|12q21.31|protein-coding	1	374462
IAH1|-|-|2p25.1|protein-coding	1	285148
ERRFI1|GENE-33|MIG-6|MIG6|RALT|-|1p36.23|protein-coding	1	54206
ATP2A1-AS1|-|-|16p11.2|ncRNA	1	100289092
TRAM1L1|-|-|4q26|protein-coding	1	133022
FMN2|-|-|1q43|protein-coding	1	56776
BMPR1A|10q23del|ACVRLK3|ALK3|CD292|SKR5|-|10q23.2|protein-coding	1	657
C20orf27|-|-|20p13|protein-coding	1	54976
TCP11|D6S230E|FPPR|-|6p21.31|protein-coding	1	6954
CKB|B-CK|BCK|CKBB|HEL-211|HEL-S-29|-|14q32.33|protein-coding	1	1152
SDC4|SYND4|-|20q13.12|protein-coding	1	6385
TNIP3|ABIN-3|LIND|-|4q27|protein-coding	1	79931
FAM86JP|-|-|3q21.2|pseudo	1	100125556
KRTAP1-5|KAP1.5|KRTAP1.5|-|17q21.2|protein-coding	1	83895
ZNF667-AS1|MORT|-|19q13.43|ncRNA	1	100128252
SNX32|SNX6B|-|11q13.1|protein-coding	1	254122
MYH15|-|-|3q13.13|protein-coding	1	22989
FLRT3|HH21|-|20p12.1|protein-coding	1	23767
LOXL1-AS1|-|-|15q24.1|ncRNA	1	100287616
ALDH3B1|ALDH4|ALDH7|-|11q13.2|protein-coding	1	221
RNF32|FKSG33|HSD15|LMBR2|-|7q36.3|protein-coding	1	140545
DGCR6|-|-|22q11.21|22q11|protein-coding	1	8214
MOXD1|MOX|PRO5780|dJ248E1.1|-|6q23.2|protein-coding	1	26002
FOXL1|FKH6|FKHL11|FREAC7|-|16q24.1|protein-coding	1	2300
MT1E|MT-1E|MT-IE|MT1|MTD|-|16q13|protein-coding	1	4493
RAB3IL1|GRAB|-|11q12.2-q12.3|protein-coding	1	5866
NPAS1|MOP5|PASD5|bHLHe11|-|19q13.32|protein-coding	1	4861
SYN1|SYN1a|SYN1b|SYNI|-|Xp11.3-p11.23|protein-coding	1	6853
PECR|DCRRP|HPDHASE|HSA250303|PVIARL|SDR29C1|TERP|-|2q35|protein-coding	1	55825
S100A4|18A2|42A|CAPL|FSP1|MTS1|P9KA|PEL98|-|1q21.3|protein-coding	1	6275
NKAPL|C6orf194|bA424I5.1|-|6p22.1|protein-coding	1	222698
RCN3|RLP49|-|19q13.33|protein-coding	1	57333
MIR4458HG|-|-|5p15.31|ncRNA	1	100505738
APOM|G3a|HSPC336|NG20|apo-M|-|6p21.33|protein-coding	1	55937
LINC01637|-|-|22q11.21|ncRNA	1	101928891
PFN2|D3S1319E|PFL|-|3q25.1|protein-coding	1	5217
PMM1|Sec53|-|22q13.2|protein-coding	1	5372
MIR199A2|MIR-199-s|MIRN199A2|mir-199a-2|-|1q24.3|ncRNA	1	406977
HOXB2|HOX2|HOX2H|Hox-2.8|K8|-|17q21.32|protein-coding	1	3212
OXCT1-AS1|-|-|5p13.1|ncRNA	1	100874002
CD68|GP110|LAMP4|SCARD1|-|17p13.1|protein-coding	1	968
MEIS3|MRG2|-|19q13.32|protein-coding	1	56917
TWIST2|AMS|BBRSAY|DERMO1|FFDD3|SETLSS|bHLHa39|-|2q37.3|protein-coding	1	117581
IGFBP6|IBP6|-|12q13.13|protein-coding	1	3489
AKR1C1|2-ALPHA-HSD|20-ALPHA-HSD|C9|DD1|DD1/DD2|DDH|DDH1|H-37|HAKRC|HBAB|MBAB|-|10p15.1|protein-coding	1	1645
ZMIZ1-AS1|-|-|10q22.3|ncRNA	1	283050
ZNF385D|ZNF659|-|3p24.3|protein-coding	1	79750
LPAR1|EDG2|GPR26|Gpcr26|LPA1|Mrec1.3|VZG1|edg-2|rec.1.3|vzg-1|-|9q31.3|protein-coding	1	1902
LGALS1|GAL1|GBP|-|22q13.1|protein-coding	1	3956
C11orf70|-|-|11q22.1|protein-coding	1	85016
MPP7|-|-|10p12.1|protein-coding	1	143098
EN1|-|-|2q14.2|protein-coding	1	2019
DEPDC4|DEP.4|-|12q23.1|protein-coding	1	120863
APCDD1L-AS1|-|-|20q13.32|ncRNA	1	149773
SNORD49B|U49B|-|17p11.2|snoRNA	1	692087
LINC01535|-|-|19q13.12|ncRNA	1	101927667
FOXC2-AS1|ODRUL|-|16q24.1|ncRNA	1	103752587
IRX1|IRX-5|IRXA1|-|5p15.33|protein-coding	1	79192
EMX2|-|-|10q26.11|protein-coding	1	2018
FKBP11|FKBP19|-|12q13.12|protein-coding	1	51303
LHPP|HDHD2B|-|10q26.13|protein-coding	1	64077
SLC28A3|CNT3|-|9q21.32-q21.33|protein-coding	1	64078
PTN|HARP|HB-GAM|HBBM|HBGF-8|HBGF8|HBNF|HBNF-1|NEGF1|OSF-1|-|7q33|protein-coding	1	5764
SAMD11|MRS|-|1p36.33|protein-coding	1	148398
AXL|ARK|JTK11|Tyro7|UFO|-|19q13.2|protein-coding	1	558
PTGER2|EP2|-|14q22.1|protein-coding	1	5732
RPSAP52|RPSA_17_1251|-|12q14.3|pseudo	1	204010
ADIRF|AFRO|APM2|C10orf116|apM-2|-|10q23.2|protein-coding	1	10974
COPZ2|zeta2-COP|-|17q21.32|protein-coding	1	51226
OLFML3|HNOEL-iso|OLF44|-|1p13.2|protein-coding	1	56944
S1PR3|EDG-3|EDG3|LPB3|S1P3|-|9q22.1|protein-coding	1	1903
TSPAN10|OCSP|-|17q25.3|protein-coding	1	83882
TMEM200A|KIAA1913|TTMA|TTMC|-|6q23.1|protein-coding	1	114801
C2orf88|smAKAP|-|2q32.2|protein-coding	1	84281
C5orf38|CEI|IRX2NB|-|5p15.33|protein-coding	1	153571
UST|2OST|-|6q25.1|protein-coding	1	10090
BCAS4|CNOL|-|20q13.13|protein-coding	1	55653
SEMA7A|CD108|CDw108|H-SEMA-K1|H-Sema-L|JMH|SEMAK1|SEMAL|-|15q24.1|protein-coding	1	8482
LINC00960|-|-|3p12.3|ncRNA	1	401074
SDCBP2-AS1|-|-|20p13|ncRNA	1	100507495
LZTS1|F37|FEZ1|-|8p21.3|protein-coding	1	11178
C12orf75|AGD3|OCC-1|OCC1|-|12q23.3|protein-coding	1	387882
SPEF2|CT122|KPL2|-|5p13.2|protein-coding	1	79925
XYLT1|DBQD2|PXYLT1|XT-I|XT1|XTI|XYLTI|xylT-I|-|16p12.3|protein-coding	1	64131
GAMT|CCDS2|HEL-S-20|PIG2|TP53I2|-|19p13.3|protein-coding	1	2593
GFPT2|GFAT|GFAT 2|GFAT2|-|5q35.3|protein-coding	1	9945
HAND2|DHAND2|Hed|Thing2|bHLHa26|dHand|-|4q34.1|protein-coding	1	9464
NOTCH2NL|N2N|-|1q21.1|protein-coding	1	388677
PHYHD1|-|-|9q34.11|protein-coding	1	254295
BAG2|BAG-2|dJ417I1.2|-|6p12.1|protein-coding	1	9532
DRAP1|NC2-alpha|-|11q13.1|protein-coding	1	10589
FBLN5|ADCL2|ARCL1A|ARMD3|DANCE|EVEC|FIBL-5|HNARMD|UP50|-|14q32.12|protein-coding	1	10516
MSC-AS1|-|-|8q13.3-q21.11|ncRNA	1	100132891
HOXC9|HOX3|HOX3B|-|12q13.13|protein-coding	1	3225
SERHL2|dJ222E13.1|-|22q13.2|protein-coding	1	253190
LOC105369340|-|-|11q13.1|ncRNA	1	105369340
EMP3|YMP|-|19q13.33|protein-coding	1	2014
LGALS3|CBP35|GAL3|GALBP|GALIG|L31|LGALS2|MAC2|-|14q22.3|protein-coding	1	3958
NTNG1|Lmnt1|-|1p13.3|protein-coding	1	22854
MB21D2|C3orf59|-|3q29|protein-coding	1	151963
MYBL1|A-MYB|AMYB|-|8q13.1|protein-coding	1	4603
C17orf97|CK20|LIAT1|-|17p13.3|protein-coding	1	400566
TRNP1|C1orf225|TNRP|-|1p36.11|protein-coding	1	388610
TMEM182|-|-|2q12.1|protein-coding	1	130827
STMN3|SCLIP|-|20q13.33|protein-coding	1	50861
SLC8A1-AS1|-|-|2p22.1|ncRNA	1	100128590
TNFRSF12A|CD266|FN14|TWEAKR|-|16p13.3|protein-coding	1	51330
SMIM10|CXorf69|-|Xq26.3|protein-coding	1	644538
NME1|AWD|GAAD|NB|NBS|NDKA|NDPK-A|NDPKA|NM23|NM23-H1|-|17q21.33|protein-coding	1	4830
TBX3|TBX3-ISO|UMS|XHL|-|12q24.21|protein-coding	1	6926
RDH5|9cRDH|HSD17B9|RDH1|SDR9C5|-|12q13.2|protein-coding	1	5959
NDN|HsT16328|PWCR|-|15q11.2|protein-coding	1	4692
IFI27L2|FAM14A|ISG12B|TLH29|-|14q32.12|protein-coding	1	83982
EIF5AL1|EIF5AP1|bA342M3.3|-|10q22.3|protein-coding	1	143244
LY6E|RIG-E|RIGE|SCA-2|SCA2|TSA-1|-|8q24.3|protein-coding	1	4061
TMEM171|PRP2|-|5q13.2|protein-coding	1	134285
TRIM14|-|-|9q22.33|protein-coding	1	9830
FAM225A|C9orf109|LINC00256A|NCRNA00256A|-|9q32|ncRNA	1	286333
NUDT1|MTH1|-|7p22.3|protein-coding	1	4521
VPS9D1-AS1|MYU|-|16q24.3|ncRNA	1	100128881
CAMK2N1|PRO1489|-|1p36.12|protein-coding	1	55450
ACOT4|PTE-Ib|PTE1B|PTE2B|-|14q24.3|protein-coding	1	122970
MT2A|MT2|-|16q13|protein-coding	1	4502
SLAMF9|CD2F-10|CD2F10|CD84-H1|CD84H1|SF2001|-|1q23.2|protein-coding	1	89886
PAK1|PAKalpha|-|11q13.5-q14.1|protein-coding	1	5058
ELOVL4|ADMD|CT118|ISQMR|SCA34|STGD2|STGD3|-|6q14.1|protein-coding	1	6785
C2orf81|hCG40743|-|2p13.1|protein-coding	1	388963
GRTP1|TBC1D6|-|13q34|protein-coding	1	79774
CTF1|CT-1|CT1|-|16p11.2|protein-coding	1	1489
MT1L|MT1|MT1R|MTF|-|16q13|pseudo	1	4500
BAALC|-|-|8q22.3|protein-coding	1	79870
KCNG1|K13|KCNG|KV6.1|kH2|-|20q13.13|protein-coding	1	3755
SNHG18|-|-|5p15.31|ncRNA	1	100505806
C11orf87|LOH11CR1A|NEURIM1|-|11q22.3|protein-coding	1	399947
BDNF|ANON2|BULN2|-|11p14.1|protein-coding	1	627
RRAS2|TC21|-|11p15.2|protein-coding	1	22800
STXBP6|HSPC156|amisyn|-|14q12|protein-coding	1	29091
LOC100505942|-|-|16q22.1|ncRNA	1	100505942
FZD2|Fz2|fz-2|fzE2|hFz2|-|17q21.31|protein-coding	1	2535
HOXC-AS1|-|-|12q13.13|ncRNA	1	100874363
ZNF69|Cos5|hZNF3|-|19p13.2|protein-coding	1	7620
LOC646903|-|-|3q25.1|ncRNA	1	646903
PPDPF|C20orf149|dJ697K14.9|exdpf|-|20q13.33|protein-coding	1	79144
PRRX1|AGOTC|PHOX1|PMX1|PRX-1|PRX1|-|1q24.2|protein-coding	1	5396
ZIC1|CRS6|ZIC|ZNF201|-|3q24|protein-coding	1	7545
MGMT|-|-|10q26.3|protein-coding	1	4255
CNIH3|CNIH-3|-|1q42.12|protein-coding	1	149111
C1QL1|C1QRF|C1QTNF14|CRF|-|17q21.31|protein-coding	1	10882
PRR16|DSC54|LARGEN|-|5q23.1|protein-coding	1	51334
TMEM200B|TTMB|-|1p35.3|protein-coding	1	399474
DUSP2|PAC-1|PAC1|-|2q11.2|protein-coding	1	1844
PRR7|-|-|5q35.3|protein-coding	1	80758
HSPB6|HEL55|Hsp20|PPP1R91|-|19q13.12|protein-coding	1	126393
FCRLB|FCRL2|FCRLM2|FCRLY|FREB-2|FREB2|FcRY|-|1q23.3|protein-coding	1	127943
DYRK4|-|-|12p13.32|protein-coding	1	8798
LOC101929523|-|-|6q27|ncRNA	1	101929523
GPR39|-|-|2q21.2|protein-coding	1	2863
MAP9|ASAP|-|4q32.1|protein-coding	1	79884
GPR85|SREB|SREB2|-|7q31.1|protein-coding	1	54329
SEPT1|DIFF6|LARP|PNUTL3|SEP1|-|16p11.2|protein-coding	1	1731
HS3ST3A1|3-OST-3A|3OST3A1|-|17p12|protein-coding	1	9955
DCLK3|CLR|DCAMKL3|DCDC3C|DCK3|-|3p22.2|protein-coding	1	85443
FOXD1|FKHL8|FREAC-4|FREAC4|-|5q13.2|protein-coding	1	2297
RPS6KA6|PP90RSK4|RSK-4|RSK4|S6K-alpha-6|p90RSK6|-|Xq21.1|protein-coding	1	27330
LITAF|PIG7|SIMPLE|TP53I7|-|16p13.13|protein-coding	1	9516
MT1A|MT1|MT1S|MTC|-|16q13|protein-coding	1	4489
AK8|AK 8|C9orf98|DDX31|-|9q34.13|protein-coding	1	158067
KRT34|HA4|Ha-4|KRTHA4|hHa4|-|17q21.2|protein-coding	1	3885
RPL39L|RPL39L1|-|3q27.3|protein-coding	1	116832
EVA1A|FAM176A|TMEM166|-|2p12|protein-coding	1	84141
CLEC11A|CLECSF3|LSLCL|P47|SCGF|-|19q13.33|protein-coding	1	6320
HMGA1|HMG-R|HMGA1A|HMGIY|-|6p21.31|protein-coding	1	3159
MT1M|MT-1M|MT-IM|MT1|MT1K|-|16q13|protein-coding	1	4499
TMEM35A|TMEM35|-|Xq22.1|protein-coding	1	59353
CYS1|-|-|2p25.1|protein-coding	1	192668
LINC01119|-|-|2p21|ncRNA	1	100134259
PCOLCE|PCPE|PCPE-1|PCPE1|-|7q22.1|protein-coding	1	5118
PSG5|FL-NCA-3|PSG|-|19q13.31|protein-coding	1	5673
SALL1|HEL-S-89|HSAL1|Sal-1|TBS|ZNF794|-|16q12.1|protein-coding	1	6299
DKK1|DKK-1|SK|-|10q21.1|protein-coding	1	22943
HOXA10-AS|HOXA-AS4|-|7p15.2|ncRNA	1	100874323
KCNS1|Kv9.1|-|20q13.12|protein-coding	1	3787
RALY-AS1|-|-|20q11.22|ncRNA	1	101926888
TMC3-AS1|-|-|15q25.1-q25.2|ncRNA	1	101929655
HTR7|5-HT7|-|10q23.31|protein-coding	1	3363
ASPHD1|-|-|16p11.2|protein-coding	1	253982
TEAD3|DTEF-1|ETFR-1|TEAD-3|TEAD5|TEF-5|TEF5|-|6p21.31|protein-coding	1	7005
CCDC152|CH5400|-|5p12|protein-coding	1	100129792
CCDC74B|-|-|2q21.1|protein-coding	1	91409
ZNF681|-|-|19p12|protein-coding	1	148213
LINC01204|-|-|Xp11.3|ncRNA	1	101927528
LOXL1|LOL|LOXL|-|15q24.1|protein-coding	1	4016
LOC730098|-|-|9p13.3|protein-coding	1	730098
CCDC8|3M3|PPP1R20|p90|-|19q13.32|protein-coding	1	83987
FAM218A|C4orf39|-|4q32.3|protein-coding	1	152756
HPDL|4-HPPD-L|GLOXD1|-|1p34.1|protein-coding	1	84842
LPXN|LDPL|-|11q12.1|protein-coding	1	9404
PRRX2|PMX2|PRX2|-|9q34.11|protein-coding	1	51450
BHLHE41|BHLHB3|DEC2|SHARP1|hDEC2|-|12p12.1|protein-coding	1	79365
DLEU1|BCMS|BCMS1|DLB1|DLEU2|LEU1|LEU2|LINC00021|NCRNA00021|XTP6|-|13q14.2-q14.3|ncRNA	1	10301
OXTR|OT-R|-|3p25.3|protein-coding	1	5021
ZNF536|-|-|19q12|protein-coding	1	9745
PRRT3-AS1|-|-|3p25.3|ncRNA	1	100874032
TC2N|C14orf47|C2CD1|MTAC2D1|Tac2-N|-|14q32.12|protein-coding	1	123036
DIRAS1|Di-Ras1|GBTS1|RIG|-|19p13.3|protein-coding	1	148252
TMEM158|BBP|RIS1|p40BBP|-|3p21.31|protein-coding	1	25907
CA12|CA-XII|CAXII|HsT18816|T18816|-|15q22.2|protein-coding	1	771
IRX3|IRX-1|IRXB1|-|16q12.2|protein-coding	1	79191
PAQR5|MPRG|-|15q23|protein-coding	1	54852
CBR1|CBR|SDR21C1|hCBR1|-|21q22.12|protein-coding	1	873
GSTO2|GSTO 2-2|bA127L20.1|-|10q25.1|protein-coding	1	119391
HRAT17|-|-|7q31.1|ncRNA	1	101928036
EFCAB1|-|-|8q11.21|protein-coding	1	79645
SLC8A1|NCX1|-|2p22.1|protein-coding	1	6546
FGF5|HBGF-5|Smag-82|TCMGLY|-|4q21.21|protein-coding	1	2250
FAM216A|C12orf24|HSU79274|-|12q24.11|protein-coding	1	29902
SLC16A7|MCT2|-|12q14.1|protein-coding	1	9194
NAALADL1|I100|NAALADASEL|-|11q13.1|protein-coding	1	10004
LINC01085|-|-|4p15.33|ncRNA	1	152742
PABPC5|PABP5|-|Xq21.31|protein-coding	1	140886
FOXF1|ACDMPV|FKHL5|FREAC1|-|16q24.1|protein-coding	1	2294
NPB|L7|PPL7|PPNPB|-|17q25.3|protein-coding	1	256933
STEAP1|PRSS24|STEAP|-|7q21.13|protein-coding	1	26872
TPM2|AMCD1|DA1|DA2B|HEL-S-273|NEM4|TMSB|-|9p13.3|protein-coding	1	7169
KHDC1|C6orf147|C6orf148|Em:AC019205.8|NDG1|bA257K9.4|-|6q13|protein-coding	1	80759
GS1-124K5.4|-|-|7q11.21|ncRNA	1	100289098
PITPNM3|ACKR6|CORD5|NIR1|RDGBA3|-|17p13.2-p13.1|protein-coding	1	83394
SLC16A4|MCT4|MCT5|-|1p13.3|protein-coding	1	9122
CBR3|HEL-S-25|SDR21C2|hCBR3|-|21q22.12|protein-coding	1	874
EIF3IP1|RG208K23|-|7q31.1|pseudo	1	442720
LOC90768|-|-|4q34.3|ncRNA	1	90768
REEP2|C5orf19|SGC32445|SPG72|Yip2d|-|5q31.2|protein-coding	1	51308
LOC102724450|-|-|1p36.31|ncRNA	1	102724450
LOC105376382|-|-|10p15.1|ncRNA	1	105376382
ID2|GIG8|ID2A|ID2H|bHLHb26|-|2p25.1|protein-coding	1	3398
CYB5R2|B5R.2|-|11p15.4|protein-coding	1	51700
AUTS2|FBRSL2|MRD26|-|7q11.22|protein-coding	1	26053
GSTM4|GSTM4-4|GTM4|-|1p13.3|protein-coding	1	2948
C3orf14|HT021|-|3p14.2|protein-coding	1	57415
C9orf40|-|-|9q21.13|protein-coding	1	55071
SLC22A18|BWR1A|BWSCR1A|HET|IMPT1|ITM|ORCTL2|SLC22A1L|TSSC5|p45-BWR1A|-|11p15.4|protein-coding	1	5002
TLCD1|-|-|17q11.2|protein-coding	1	116238
RPL22L1|-|-|3q26.2|protein-coding	1	200916
IL11|AGIF|IL-11|-|19q13.42|protein-coding	1	3589
IRX2|IRXA2|-|5p15.33|protein-coding	1	153572
MXRA8|-|-|1p36.33|protein-coding	1	54587
FNDC10|C1orf233|-|1p36.33|protein-coding	1	643988
LINC01605|-|-|8p11.23|ncRNA	1	100507420
KDM4A-AS1|-|-|1p34.2-p34.1|ncRNA	1	100132774
KRBOX1|-|-|3p22.1|protein-coding	1	100506243
MIR100HG|AGD1|linc-NeD125|lncRNA-N2|-|11q24.1|ncRNA	1	399959
APOBEC3G|A3G|ARCD|ARP-9|ARP9|CEM-15|CEM15|MDS019|bK150C2.7|dJ494G10.1|-|22q13.1|protein-coding	1	60489
LDOC1|BCUR1|Mar7|Mart7|-|Xq27.1|protein-coding	1	23641
CCBE1|HKLLS1|-|18q21.32|protein-coding	1	147372
GPX7|CL683|GPX6|GPx-7|GSHPx-7|NPGPx|-|1p32.3|protein-coding	1	2882
PITX2|ARP1|Brx1|IDG2|IGDS|IGDS2|IHG2|IRID2|Otlx2|PTX2|RGS|RIEG|RIEG1|RS|-|4q25|protein-coding	1	5308
LOC101928000|-|-|17p13.2|ncRNA	1	101928000
FOSL1|FRA|FRA1|fra-1|-|11q13.1|protein-coding	1	8061
BOLA3|MMDS2|-|2p13.1|protein-coding	1	388962
INSC|-|-|11p15.2|protein-coding	1	387755
SH3BGRL3|HEL-S-297|SH3BP-1|TIP-B1|-|1p36.11|protein-coding	1	83442

## Sheet: 1852_DEgenes_fibro_vs_GEOsmooth
ANNO	cluster	GeneID
SGMS2|SMS2|-|4q25|protein-coding	cl1	166929
PRSS3|MTG|PRSS4|T9|TRY3|TRY4|-|9p13.3|protein-coding	cl1	5646
TEK|CD202B|TIE-2|TIE2|VMCM|VMCM1|-|9p21.2|protein-coding	cl1	7010
NFKBIZ|IKBZ|INAP|MAIL|-|3q12.3|protein-coding	cl1	64332
ST6GALNAC4|IV|SIAT3-C|SIAT3C|SIAT7-D|SIAT7D|ST6GALNACIV|ST6GalNAc|-|9q34.11|protein-coding	cl1	27090
SNRPE|HYPT11|SME|Sm-E|snRNP-E|-|1q32.1|protein-coding	cl1	6635
RPL13AP5|RPL13A_8_1086|bA196N24.2|-|10q24.1|pseudo	cl1	728658
PKIA|PRKACN1|-|8q21.13|protein-coding	cl1	5569
DRP2|DRP-2|-|Xq22.1|protein-coding	cl1	1821
SRGAP2C|SRGAP2P1|-|1p11.2|protein-coding	cl1	653464
FASN|FAS|OA-519|SDR27X1|-|17q25.3|protein-coding	cl1	2194
TNIK|MRT54|-|3q26.2-q26.31|protein-coding	cl1	23043
PROCR|CCCA|CCD41|EPCR|-|20q11.22|protein-coding	cl1	10544
HYI|HT036|-|1p34.2|protein-coding	cl1	81888
FRMD4A|CCAFCA|FRMD4|bA295P9.4|-|10p13|protein-coding	cl1	55691
HNRNPA1P10|HNRPA1L-2|-|19p13.2|pseudo	cl1	664709
RPL36A|L36A|L44L|MIG6|RPL44|-|Xq22.1|protein-coding	cl1	6173
GTF2H2C|GTF2H2C_2|-|5q13.2|protein-coding	cl1	728340
NUDT4|DIPP2|DIPP2alpha|DIPP2beta|HDCMB47P|-|12q22|protein-coding	cl1	11163
THBS2|TSP2|-|6q27|protein-coding	cl1	7058
DBNDD1|-|-|16q24.3|protein-coding	cl1	79007
ADGRL2|CIRL2|CL2|LEC1|LPHH1|LPHN2|-|1p31.1|protein-coding	cl1	23266
STXBP2|FHL5|Hunc18b|MUNC18-2|UNC18-2|UNC18B|pp10122|-|19p13.2|protein-coding	cl1	6813
MMP1|CLG|CLGN|-|11q22.2|protein-coding	cl1	4312
FADS2|D6D|DES6|FADSD6|LLCDL2|SLL0262|TU13|-|11q12.2|protein-coding	cl1	9415
EBF3|COE3|EBF-3|O/E-2|OE-2|-|10q26.3|protein-coding	cl1	253738
EIF4E|AUTS19|CBP|EIF4E1|EIF4EL1|EIF4F|eIF-4E|-|4q23|protein-coding	cl1	1977
MEST|PEG1|-|7q32.2|protein-coding	cl1	4232
RPLP0|L10E|LP0|P0|PRLP0|RPP0|-|12q24.23|protein-coding	cl1	6175
AFAP1|AFAP|AFAP-110|AFAP110|-|4p16.1|protein-coding	cl1	60312
TNFRSF1B|CD120b|TBPII|TNF-R-II|TNF-R75|TNFBR|TNFR1B|TNFR2|TNFR80|p75|p75TNFR|-|1p36.22|protein-coding	cl1	7133
GAREM1|C18orf11|FAM59A|GAREM|Gm944|-|18q12.1|protein-coding	cl1	64762
SPOCK1|SPOCK|TESTICAN|TIC1|-|5q31.2|protein-coding	cl1	6695
ADGRB2|BAI2|-|1p35.2|protein-coding	cl1	576
DAPK1|DAPK|-|9q21.33|protein-coding	cl1	1612
CA12|CA-XII|CAXII|HsT18816|T18816|-|15q22.2|protein-coding	cl1	771
TGFB2|G-TSF|LDS4|TGF-beta2|-|1q41|protein-coding	cl1	7042
WNK4|PHA2B|PRKWNK4|-|17q21.2|protein-coding	cl1	65266
RAP1B|K-REV|RAL1B|-|12q15|protein-coding	cl1	5908
CTXN1|CTXN|-|19p13.2|protein-coding	cl1	404217
CBS|HIP4|-|21q22.3|protein-coding	cl1	875
FAM43A|-|-|3q29|protein-coding	cl1	131583
GXYLT2|GLT8D4|-|3p13|protein-coding	cl1	727936
NCOA7|ERAP140|ESNA1|NCOA7-AS|Nbla00052|Nbla10993|TLDC4|dJ187J11.3|-|6q22.31-q22.32|protein-coding	cl1	135112
MEMO1|C2orf4|CGI-27|MEMO|NS5ATP7|-|2p22.3|protein-coding	cl1	51072
F8A2|-|-|Xq28|protein-coding	cl1	474383
APOLD1|VERGE|-|12p13.1|protein-coding	cl1	81575
VEGFA|MVCD1|VEGF|VPF|-|6p21.1|protein-coding	cl1	7422
MGARP|C4orf49|CESP-1|HUMMR|OSAP|-|4q31.1|protein-coding	cl1	84709
RGS5|MST092|MST106|MST129|MSTP032|MSTP092|MSTP106|MSTP129|-|1q23.3|protein-coding	cl1	8490
RCN1|HEL-S-84|PIG20|RCAL|RCN|-|11p13|protein-coding	cl1	5954
MSTO2P|MSTO2|-|1q22|pseudo	cl1	100129405
PALMD|C1orf11|PALML|-|1p21.2|protein-coding	cl1	54873
EIF3CL|-|-|16p12.1|protein-coding	cl1	728689
PDE3A|CGI-PDE|CGI-PDE A|CGI-PDE-A|HTNB|-|12p12.2|protein-coding	cl1	5139
PDE5A|CGB-PDE|CN5A|PDE5|-|4q26|protein-coding	cl1	8654
ZNF658|-|-|9q21.11|protein-coding	cl1	26149
AKR1C2|AKR1C-pseudo|BABP|DD|DD-2|DD/BABP|DD2|DDH2|HAKRD|HBAB|MCDR2|SRXY8|TDD|-|10p15.1|protein-coding	cl1	1646
PRRG1|PRGP1|-|Xp21.1|protein-coding	cl1	5638
PPM1H|ARHCL1|NERPP-2C|URCC2|-|12q14.1-q14.2|protein-coding	cl1	57460
NES|Nbla00170|-|1q23.1|protein-coding	cl1	10763
SNORD141A|-|-|9q34.13|snoRNA	cl1	106635683
ADORA2B|ADORA2|-|17p12|protein-coding	cl1	136
GRB10|GRB-IR|Grb-10|IRBP|MEG1|RSS|-|7p12.1|protein-coding	cl1	2887
H3F3A|H3.3A|H3F3|-|1q42.12|protein-coding	cl1	3020
CYGB|HGB|STAP|-|17q25.1|protein-coding	cl1	114757
NFIB|CTF|HMGIC/NFIB|NF-I/B|NF1-B|NFI-B|NFI-RED|NFIB2|NFIB3|-|9p23-p22.3|protein-coding	cl1	4781
ANGPTL1|ANG3|ANGPT3|ARP1|AngY|UNQ162|dJ595C2.2|-|1q25.2|protein-coding	cl1	9068
TMEM160|-|-|19q13.32|protein-coding	cl1	54958
LSM12|PNAS-135|-|17q21.31|protein-coding	cl1	124801
H3F3AP4|p13|-|2q31.1|pseudo	cl1	440926
EIF4EBP1|4E-BP1|4EBP1|BP-1|PHAS-I|-|8p11.23|protein-coding	cl1	1978
ITGA2|BR|CD49B|GPIa|HPA-5|VLA-2|VLAA2|-|5q11.2|protein-coding	cl1	3673
MIR1244-1|MIR1244|MIRN1244|hsa-mir-1244|hsa-mir-1244-1|-|2q37.1|ncRNA	cl1	100302285
PCDH10|OL-PCDH|PCDH19|-|4q28.3|protein-coding	cl1	57575
FXN|CyaY|FA|FARR|FRDA|X25|-|9q21.11|protein-coding	cl1	2395
GALNT12|CRCS1|GalNAc-T12|-|9q22.33|protein-coding	cl1	79695
RGS4|RGP4|SCZD9|-|1q23.3|protein-coding	cl1	5999
RPS15A|S15a|-|16p12.3|protein-coding	cl1	6210
IER3|DIF-2|DIF2|GLY96|IEX-1|IEX-1L|IEX1|PRG1|-|6p21.33|protein-coding	cl1	8870
SH2D5|-|-|1p36.12|protein-coding	cl1	400745
CFAP54|C12orf55|C12orf63|-|12q23.1|protein-coding	cl1	144535
SPRED3|Eve-3|spred-3|-|19q13.2|protein-coding	cl1	399473
E2F5|E2F-5|-|8q21.2|protein-coding	cl1	1875
RAC2|EN-7|Gx|HSPC022|p21-Rac2|-|22q13.1|protein-coding	cl1	5880
ZNF185|SCELL|-|Xq28|protein-coding	cl1	7739
SNHG16|Nbla10727|Nbla12061|ncRAN|-|17q25.1|ncRNA	cl1	100507246
OAF|NS5ATP13TP2|-|11q23.3|protein-coding	cl1	220323
HIC1|ZBTB29|ZNF901|hic-1|-|17p13.3|protein-coding	cl1	3090
CDH2|CD325|CDHN|CDw325|NCAD|-|18q12.1|protein-coding	cl1	1000
PAPPA|ASBABP2|DIPLA1|IGFBP-4ase|PAPA|PAPP-A|PAPPA1|-|9q33.1|protein-coding	cl1	5069
STAT1|CANDF7|IMD31A|IMD31B|IMD31C|ISGF-3|STAT91|-|2q32.2|protein-coding	cl1	6772
SOD2|IPO-B|IPOB|MNSOD|MVCD6|Mn-SOD|-|6q25.3|protein-coding	cl1	6648
MTSS1|MIM|MIMA|MIMB|-|8q24.13|protein-coding	cl1	9788
METRN|C16orf23|c380A1.2|-|16p13.3|protein-coding	cl1	79006
UBE2E2|UBCH8|-|3p24.3|protein-coding	cl1	7325
CLCN5|CLC5|CLCK2|ClC-5|DENTS|NPHL1|NPHL2|XLRH|XRN|hCIC-K2|-|Xp11.23|protein-coding	cl1	1184
OSBPL10|ORP10|OSBP9|-|3p23|protein-coding	cl1	114884
G6PD|G6PD1|-|Xq28|protein-coding	cl1	2539
INO80C|C18orf37|IES6|hIes6|-|18q12.2|protein-coding	cl1	125476
FOXP1|12CC4|HSPC215|MFH|QRF1|hFKH1B|-|3p13|protein-coding	cl1	27086
GPC6|OMIMD1|-|13q31.3-q32.1|protein-coding	cl1	10082
ZFHX4|ZFH4|ZHF4|-|8q21.13|protein-coding	cl1	79776
DPY19L3|-|-|19q13.11|protein-coding	cl1	147991
RGS10|-|-|10q26.11|protein-coding	cl1	6001
UQCRHL|-|-|1p36.21|protein-coding	cl1	440567
LGALS3BP|90K|BTBD17B|CyCAP|M2BP|MAC-2-BP|TANGO10B|gp90|-|17q25.3|protein-coding	cl1	3959
ARAP3|CENTD3|DRAG1|-|5q31.3|protein-coding	cl1	64411
ASB1|ASB-1|-|2q37.3|protein-coding	cl1	51665
FZD4|CD344|EVR1|FEVR|FZD4S|Fz-4|Fz4|FzE4|GPCR|hFz4|-|11q14.2|protein-coding	cl1	8322
C1R|EDSPD1|-|12p13.31|protein-coding	cl1	715
MEX3A|MEX-3A|RKHD4|-|1q22|protein-coding	cl1	92312
TRIM16|EBBP|-|17p12|protein-coding	cl1	10626
CA13|CAXIII|-|8q21.2|protein-coding	cl1	377677
EFEMP1|DHRD|DRAD|FBLN3|FBNL|FIBL-3|MLVT|MTLV|S1-5|-|2p16.1|protein-coding	cl1	2202
CAMK4|CaMK IV|CaMK-GR|caMK|-|5q22.1|protein-coding	cl1	814
TIMM23B|bA592B15.7|-|10q11.23|protein-coding	cl1	100652748
APOL3|APOLIII|CG121|CG12_1|apoL-III|-|22q12.3|protein-coding	cl1	80833
WHAMMP2|WHAMML2|WHDC1L2|-|15q13.1|pseudo	cl1	440253
MFSD12|C19orf28|PP3501|-|19p13.3|protein-coding	cl1	126321
SFRP4|FRP-4|FRPHE|PYL|sFRP-4|-|7p14.1|protein-coding	cl1	6424
TNFAIP3|A20|AISBL|OTUD7C|TNFA1P2|-|6q23.3|protein-coding	cl1	7128
CYBA|p22-PHOX|-|16q24.2|protein-coding	cl1	1535
LRRC8C|AD158|FAD158|-|1p22.2|protein-coding	cl1	84230
LAMA5|-|-|20q13.33|protein-coding	cl1	3911
TMEM200A|KIAA1913|TTMA|TTMC|-|6q23.1|protein-coding	cl1	114801
CARD6|CINCIN1|-|5p13.1|protein-coding	cl1	84674
ZNF175|OTK18|-|19q13.41|protein-coding	cl1	7728
KIAA1755|-|-|20q11.23|protein-coding	cl1	85449
GRASP|TAMALIN|-|12q13.13|protein-coding	cl1	160622
DAAM1|-|-|14q23.1|protein-coding	cl1	23002
RPL17|L17|PD-1|RPL23|-|18q21.1|protein-coding	cl1	6139
NBPF20|-|-|1q21.1|protein-coding	cl1	100288142
WASH2P|FAM39B|-|2q14.1|pseudo	cl1	375260
SLC19A1|CHMD|FOLT|IFC1|REFC|RFC1|-|21q22.3|protein-coding	cl1	6573
LRRC32|D11S833E|GARP|-|11q13.5|protein-coding	cl1	2615
DDIT4|Dig2|REDD-1|REDD1|-|10q22.1|protein-coding	cl1	54541
AKAP12|AKAP250|SSeCKS|-|6q25.1|protein-coding	cl1	9590
PPP1R14B|PHI-1|PLCB3N|PNG|SOM172|-|11q13.1|protein-coding	cl1	26472
ADAM9|CORD9|MCMP|MDC9|Mltng|-|8p11.22|protein-coding	cl1	8754
PLOD2|BRKS2|LH2|TLH|-|3q24|protein-coding	cl1	5352
ALDH2|ALDH-E2|ALDHI|ALDM|-|12q24.12|protein-coding	cl1	217
APLN|APEL|XNPEP2|-|Xq26.1|protein-coding	cl1	8862
MIR3654|-|-|7q33|ncRNA	cl1	100500804
ERV3-1|ERV-R|ERV3|ERVR|HERV-R|HERVR|envR|-|7q11.21|protein-coding	cl1	2086
NSG1|D4S234|D4S234E|NEEP21|P21|-|4p16.3|protein-coding	cl1	27065
RPS28|DBA15|S28|-|19p13.2|protein-coding	cl1	6234
RPL21|HYPT12|L21|-|13q12.2|protein-coding	cl1	6144
SOD3|EC-SOD|-|4p15.2|protein-coding	cl1	6649
TFPI|EPI|LACI|TFI|TFPI1|-|2q32.1|protein-coding	cl1	7035
PLCD4|-|-|2q35|protein-coding	cl1	84812
RPL4|L4|-|15q22.31|protein-coding	cl1	6124
ABHD17A|C19orf27|FAM108A1|-|19p13.3|protein-coding	cl1	81926
SH2B3|IDDM20|LNK|-|12q24.12|protein-coding	cl1	10019
LACTB|G24|MRPL56|-|15q22.2|protein-coding	cl1	114294
BNC2|BSN2|-|9p22.3-p22.2|protein-coding	cl1	54796
TCEAL7|MPMGp800C04260Q003|WEX5|-|Xq22.2|protein-coding	cl1	56849
SRGAP2B|SRGAP2L|SRGAP2P2|-|1q21.1|protein-coding	cl1	647135
MBP|-|-|18q23|protein-coding	cl1	4155
CORO2B|CLIPINC|-|15q23|protein-coding	cl1	10391
RPS23|S23|-|5q14.2|protein-coding	cl1	6228
CABLES1|CABL1|CABLES|HsT2563|IK3-1|-|18q11.2|protein-coding	cl1	91768
CPA4|CPA3|-|7q32.2|protein-coding	cl1	51200
VDAC2|POR|-|10q22.2|protein-coding	cl1	7417
VOPP1|ECOP|GASP|-|7p11.2|protein-coding	cl1	81552
RPS3A|FTE1|MFTL|S3A|-|4q31.3|protein-coding	cl1	6189
THOC3|THO3|hTREX45|-|5q35.2|protein-coding	cl1	84321
TFRC|CD71|IMD46|T9|TFR|TFR1|TR|TRFR|p90|-|3q29|protein-coding	cl1	7037
RNF217|C6orf172|IBRDC1|OSTL|dJ84N20.1|-|6q22.31|protein-coding	cl1	154214
NXPH4|NPH4|-|12q13.3|protein-coding	cl1	11247
CNTNAP1|CASPR|CNTNAP|NRXN4|P190|-|17q21.2|protein-coding	cl1	8506
ITGB3|BDPLT16|BDPLT2|CD61|GP3A|GPIIIa|GT|-|17q21.32|protein-coding	cl1	3690
NUAK2|SNARK|-|1q32.1|protein-coding	cl1	81788
CHST11|C4ST|C4ST-1|C4ST1|HSA269537|-|12q23.3|protein-coding	cl1	50515
RPSA|37LRP|67LR|ICAS|LAMBR|LAMR1|LBP|LBP/p40|LRP|LRP/LR|NEM/1CHD4|SA|lamR|p40|-|3p22.1|protein-coding	cl1	3921
EEF1G|EF1G|GIG35|-|11q12.3|protein-coding	cl1	1937
FLI1|EWSR2|SIC-1|-|11q24.3|protein-coding	cl1	2313
TMEM132B|-|-|12q24.31-q24.32|protein-coding	cl1	114795
SMN1|BCD541|GEMIN1|SMA|SMA1|SMA2|SMA3|SMA4|SMA@|SMN|SMNT|T-BCD541|TDRD16A|-|5q13.2|protein-coding	cl1	6606
GTF2IP4|-|-|7q11.23|pseudo	cl1	100093631
GTF2H2|BTF2|BTF2P44|T-BTF2P44|TFIIH|p44|-|5q13.2|protein-coding	cl1	2966
PNMA2|MA2|MM2|RGAG2|-|8p21.2|protein-coding	cl1	10687
ARHGDIB|D4|GDIA2|GDID4|LYGDI|Ly-GDI|RAP1GN1|RhoGDI2|-|12p12.3|protein-coding	cl1	397
TCEA1|GTF2S|SII|TCEA|TF2S|TFIIS|-|8q11.23|protein-coding	cl1	6917
CHSY1|CHSY|CSS1|ChSy-1|TPBS|-|15q26.3|protein-coding	cl1	22856
GTF2IP1|WBSCR7|-|7q11.23|pseudo	cl1	2970
ANXA2P2|ANX2L2|ANX2P2|LPC2B|-|9p13.3|pseudo	cl1	304
RGPD5|BS-63|BS63|HEL161|RGP5|-|2q13|protein-coding	cl1	84220
CXCL6|CKA-3|GCP-2|GCP2|SCYB6|-|4q13.3|protein-coding	cl1	6372
LYPLA1|APT-1|APT1|LPL-I|LPL1|hAPT1|-|8q11.23|protein-coding	cl1	10434
MLLT11|AF1Q|-|1q21.3|protein-coding	cl1	10962
ZNF462|Zfp462|-|9q31.2|protein-coding	cl1	58499
ZNF469|BCS|BCS1|-|16q24.2|protein-coding	cl1	84627
CD9|BTCC-1|DRAP-27|MIC3|MRP-1|TSPAN-29|TSPAN29|-|12p13.31|protein-coding	cl1	928
GK|GK1|GKD|-|Xp21.2|protein-coding	cl1	2710
PLK2|SNK|hPlk2|hSNK|-|5q11.2|protein-coding	cl1	10769
BOLA2-SMG1P6|-|-|16p11.2|protein-coding	cl1	107282092
AHR|bHLHe76|-|7p21.1|protein-coding	cl1	196
IGF2R|CD222|CI-M6PR|CIMPR|M6P-R|M6P/IGF2R|MPR 300|MPR1|MPR300|MPRI|-|6q25.3|protein-coding	cl1	3482
LOXL3|LOXL|-|2p13.1|protein-coding	cl1	84695
DCBLD2|CLCP1|ESDN|-|3q12.1|3|protein-coding	cl1	131566
CCL2|GDCF-2|HC11|HSMCR30|MCAF|MCP-1|MCP1|SCYA2|SMC-CF|-|17q12|protein-coding	cl1	6347
MSC|ABF-1|ABF1|MYOR|bHLHa22|-|8q13.3|protein-coding	cl1	9242
MIR1244-3|-|-|12p13.31|ncRNA	cl1	100422872
LINC00941|-|-|12p11.21|ncRNA	cl1	100287314
MARCH3|MARCH-III|RNF173|-|5q23.2|protein-coding	cl1	115123
PDE7B|bA472E5.1|-|6q23.3|protein-coding	cl1	27115
STC1|STC|-|8p21.2|protein-coding	cl1	6781
SEMA3A|COLL1|HH16|Hsema-I|Hsema-III|SEMA1|SEMAD|SEMAIII|SEMAL|SemD|coll-1|-|7q21.11|protein-coding	cl1	10371
RPL29|HIP|HUMRPL29|L29|RPL29P10|RPL29_3_370|-|3p21.2|protein-coding	cl1	6159
CEBPD|C/EBP-delta|CELF|CRP3|NF-IL6-beta|-|8q11.21|protein-coding	cl1	1052
VWA1|WARP|-|1p36.33|protein-coding	cl1	64856
DPY19L1|-|-|7p14.2|protein-coding	cl1	23333
GNG11|GNGT11|-|7q21.3|protein-coding	cl1	2791
ME1|HUMNDME|MES|-|6q14.2|protein-coding	cl1	4199
SLC38A1|ATA1|NAT2|SAT1|SNAT1|-|12q13.11|protein-coding	cl1	81539
BCAT1|BCATC|BCT1|ECA39|MECA39|PNAS121|PP18|-|12p12.1|protein-coding	cl1	586
PCYOX1L|-|-|5q32|protein-coding	cl1	78991
UBE2S|E2-EPF|E2EPF|EPF5|-|19q13.42|protein-coding	cl1	27338
PLAT|T-PA|TPA|-|8p11.21|protein-coding	cl1	5327
MAPK13|MAPK 13|MAPK-13|PRKM13|SAPK4|p38delta|-|6p21.31|protein-coding	cl1	5603
TJP2|C9DUPq21.11|DFNA51|DUP9q21.11|PFIC4|X104|ZO2|-|9q21.11|protein-coding	cl1	9414
SEMA3D|Sema-Z2|coll-2|-|7q21.11|protein-coding	cl1	223117
CARMIL1|CARMIL|CARMIL1a|LRRC16|LRRC16A|dJ501N12.1|dJ501N12.5|-|6p22.2|protein-coding	cl1	55604
F2RL1|GPR11|PAR2|-|5q13.3|protein-coding	cl1	2150
CDC42EP2|BORG1|CEP2|-|11q13.1|protein-coding	cl1	10435
TSTA3|FX|P35B|SDR4E1|-|8q24.3|protein-coding	cl1	7264
HMGA2|BABL|HMGI-C|HMGIC|LIPO|STQTL9|-|12q14.3|protein-coding	cl1	8091
PTPRF|BNAH2|LAR|-|1p34.2|protein-coding	cl1	5792
SMN2|BCD541|C-BCD541|GEMIN1|SMNC|TDRD16B|-|5q13.2|protein-coding	cl1	6607
RPS10-NUDT3|-|-|6p21.31|protein-coding	cl1	100529239
SRPX|DRS|ETX1|HEL-S-83p|SRPX1|-|Xp11.4|protein-coding	cl1	8406
TGFB2-OT1|-|-|1q41|ncRNA	cl1	103611157
BZW1|BZAP45|Nbla10236|-|2q33.1|protein-coding	cl1	9689
PTGS1|COX1|COX3|PCOX1|PES-1|PGG/HS|PGHS-1|PGHS1|PHS1|PTGHS|-|9q33.2|protein-coding	cl1	5742
DYSF|FER1L1|LGMD2B|MMD1|-|2p13.2|protein-coding	cl1	8291
PLCB1|EIEE12|PI-PLC|PLC-154|PLC-I|PLC-beta-1|PLC154|PLCB1A|PLCB1B|-|20p12.3|protein-coding	cl1	23236
RPL13|BBC1|D16S444E|D16S44E|L13|-|16q24.3|17p11.2|protein-coding	cl1	6137
PEAR1|JEDI|MEGF12|-|1q23.1|protein-coding	cl1	375033
MIR7111|hsa-mir-7111|-|6p21.31|ncRNA	cl1	102465668
RPL17-C18orf32|-|-|18q21.1|protein-coding	cl1	100526842
STAG3L1|STAG3L1P|STAG3L2|STAG3L3|-|7q11.23|pseudo	cl1	54441
ECE1|ECE|-|1p36.12|protein-coding	cl1	1889
S1PR3|EDG-3|EDG3|LPB3|S1P3|-|9q22.1|protein-coding	cl1	1903
MIR1181|MIRN1181|hsa-mir-1181|-|19p13.2|ncRNA	cl1	100302213
SNORD141B|-|-|5p15.2|snoRNA	cl1	106635684
PDGFA|PDGF-A|PDGF1|-|7p22.3|protein-coding	cl1	5154
TGM2|TG(C)|TGC|-|20q11.23|protein-coding	cl1	7052
KIAA0922|TMEM131L|-|4q31.3|protein-coding	cl1	23240
SHC3|N-Shc|NSHC|RAI|SHCC|-|9q22.1|protein-coding	cl1	53358
HMGA1|HMG-R|HMGA1A|HMGIY|-|6p21.31|protein-coding	cl1	3159
DPYSL2|CRMP-2|CRMP2|DHPRP2|DRP-2|DRP2|N2A3|ULIP-2|ULIP2|-|8p21.2|protein-coding	cl1	1808
JUP|ARVD12|CTNNG|DP3|DPIII|PDGB|PKGB|-|17q21.2|protein-coding	cl1	3728
HPSE|HPA|HPA1|HPR1|HPSE1|HSE1|-|4q21.23|protein-coding	cl1	10855
RRAS2|TC21|-|11p15.2|protein-coding	cl1	22800
RPL26|DBA11|L26|-|17p13.1|protein-coding	cl1	6154
PLTP|BPIFE|HDLCQ9|-|20q13.12|protein-coding	cl1	5360
FAM3C|GS3786|ILEI|-|7q31.31|protein-coding	cl1	10447
GDF6|BMP-13|BMP13|CDMP2|KFM|KFS|KFS1|KFSL|SGM1|-|8q22.1|protein-coding	cl1	392255
THSD4|ADAMTSL-6|ADAMTSL6|FVSY9334|PRO34005|-|15q23|protein-coding	cl1	79875
RPS10|DBA9|S10|-|6p21.31|protein-coding	cl1	6204
SYT1|P65|SVP65|SYT|-|12q21.2|protein-coding	cl1	6857
PTGFRN|CD315|CD9P-1|EWI-F|FPRP|SMAP-6|-|1p13.1|protein-coding	cl1	5738
NPM1|B23|NPM|-|5q35.1|protein-coding	cl1	4869
STAC|STAC1|-|3p22.3-p22.2|protein-coding	cl1	6769
AIDA|C1orf80|-|1q41|protein-coding	cl1	64853
AGRN|CMS8|CMSPPD|-|1p36.33|protein-coding	cl1	375790
WLS|C1orf139|EVI|GPR177|MRP|mig-14|-|1p31.3|protein-coding	cl1	79971
IRAK3|ASRT5|IRAKM|-|12q14.3|protein-coding	cl1	11213
RPL41|L41|-|12q13.2|protein-coding	cl1	6171
TINAGL1|ARG1|LCN7|LIECG3|TINAGRP|-|1p35.2|protein-coding	cl1	64129
EGFR|ERBB|ERBB1|HER1|NISBD2|PIG61|mENA|-|7p11.2|protein-coding	cl1	1956
SCARB1|CD36L1|CLA-1|CLA1|HDLQTL6|SR-BI|SRB1|-|12q24.31|protein-coding	cl1	949
BCAM|AU|CD239|LU|MSK19|-|19q13.32|protein-coding	cl1	4059
DHCR7|SLOS|-|11q13.4|protein-coding	cl1	1717
TMEM132A|GBP|HSPA5BP1|-|11q12.2|protein-coding	cl1	54972
IGFBP5|IBP5|-|2q35|protein-coding	cl1	3488
VWA5A|BCSC-1|BCSC1|LOH11CR2A|-|11q24.2|protein-coding	cl1	4013
FLJ42627|-|-|16p13.3|ncRNA	cl1	645644
TFPI2|PP5|REF1|TFPI-2|-|7q21.3|protein-coding	cl1	7980
OSMR|IL-31R-beta|IL-31RB|OSMRB|PLCA1|-|5p13.1|protein-coding	cl1	9180
PROS1|PROS|PS21|PS22|PS23|PS24|PS25|PSA|THPH5|THPH6|-|3q11.1|protein-coding	cl1	5627
TP53|BCC7|LFS1|P53|TRP53|-|17p13.1|protein-coding	cl1	7157
LOC100289561|-|-|7q22.1|protein-coding	cl1	100289561
GJA1|AVSD3|CMDR|CX43|EKVP|GJAL|HLHS1|HSS|ODDD|PPKCA|-|6q22.31|protein-coding	cl1	2697
F8A1|DXS522E|F8A|HAP40|-|Xq28|protein-coding	cl1	8263
ICAM1|BB2|CD54|P3.58|-|19p13.2|protein-coding	cl1	3383
RPS26|DBA10|S26|-|12q13.2|protein-coding	cl1	6231
RPS27|MPS-1|MPS1|S27|-|1q21.3|protein-coding	cl1	6232
ARL4C|ARL7|LAK|-|2q37.1|protein-coding	cl1	10123
AKR1C3|DD3|DDX|HA1753|HAKRB|HAKRe|HSD17B5|PGFS|hluPGFS|-|10p15.1|protein-coding	cl1	8644
C19orf48|-|-|19q13.33|protein-coding	cl1	84798
EDIL3|DEL1|-|5q14.3|protein-coding	cl1	10085
RPL39|L39|RPL39P42|RPL39_23_1806|-|Xq24|protein-coding	cl1	6170
TPGS1|C19orf20|GTRGEO22|PGs1|-|19p13.3|protein-coding	cl1	91978
PLEK2|-|-|14q23.3-q24.1|protein-coding	cl1	26499
PTX3|TNFAIP5|TSG-14|-|3q25.32|protein-coding	cl1	5806
CORO1A|CLABP|CLIPINA|HCORO1|IMD8|TACO|p57|-|16p11.2|protein-coding	cl1	11151
MIR4435-2HG|AGD2|AK001796|LINC00978|MIR4435-1HG|-|2q13|ncRNA	cl1	541471
ATF5|ATFX|HMFN0395|-|19q13.33|protein-coding	cl1	22809
RPS24|DBA3|S24|-|10q22.3|protein-coding	cl1	6229
PLEKHG5|CMTRIC|DSMA4|GEF720|Syx|Tech|-|1p36.31|protein-coding	cl1	57449
LOC285074|-|-|2p11.2|pseudo	cl1	285074
PID1|HMFN2073|NYGGF4|P-CLI1|PCLI1|-|2q36.3|protein-coding	cl1	55022
POU2F2|OCT2|OTF2|Oct-2|-|19q13.2|protein-coding	cl1	5452
SH3BP1|ARHGAP43|-|22q13.1|protein-coding	cl1	23616
F2R|CF2R|HTR|PAR-1|PAR1|TR|-|5q13.3|protein-coding	cl1	2149
RPL18A|L18A|-|19p13.11|protein-coding	cl1	6142
NBPF25P|WI2-925H4.1|-|1q21.1|pseudo	cl1	101929780
RAB27B|C25KG|-|18q21.2|protein-coding	cl1	5874
AP1S3|PSORS15|-|2q36.1|protein-coding	cl1	130340
RGPD8|RANBP2L1|RGP8|RanBP2alpha|-|2q14.1|protein-coding	cl1	727851
FERMT3|KIND3|MIG-2|MIG2B|UNC112C|URP2|URP2SF|-|11q13.1|protein-coding	cl1	83706
LDOC1|BCUR1|Mar7|Mart7|-|Xq27.1|protein-coding	cl1	23641
MANSC1|9130403P13Rik|LOH12CR3|-|12p13.2|protein-coding	cl1	54682
DACT1|DAPPER|DAPPER1|DPR1|FRODO|HDPR1|THYEX3|-|14q23.1|protein-coding	cl1	51339
DPP4|ADABP|ADCP2|CD26|DPPIV|TP103|-|2q24.2|protein-coding	cl1	1803
E2F7|-|-|12q21.2|protein-coding	cl1	144455
EIF5AL1|EIF5AP1|bA342M3.3|-|10q22.3|protein-coding	cl1	143244
RHOJ|ARHJ|RASL7B|TC10B|TCL|-|14q23.2|protein-coding	cl1	57381
PLSCR1|MMTRA1B|-|3q24|protein-coding	cl1	5359
SLC7A11|CCBR1|xCT|-|4q28.3|protein-coding	cl1	23657
RPS25|S25|-|11q23.3|protein-coding	cl1	6230
ZFP69B|ZKSCAN23B|ZNF643|ZSCAN54B|-|1p34.2|protein-coding	cl1	65243
ATP5D|-|-|19p13.3|protein-coding	cl1	513
SLC1A1|DCBXA|EAAC1|EAAT3|SCZD18|-|9p24.2|protein-coding	cl1	6505
PCSK5|PC5|PC6|PC6A|SPC6|-|9q21.13|protein-coding	cl1	5125
TP53I11|PIG11|-|11p11.2|protein-coding	cl1	9537
ATP13A3|AFURS1|-|3q29|protein-coding	cl1	79572
LIFR|CD118|LIF-R|SJS2|STWS|SWS|-|5p13.1|protein-coding	cl1	3977
CTSC|CPPI|DPP-I|DPP1|DPPI|HMS|JP|JPD|PALS|PDON1|PLS|-|11q14.2|protein-coding	cl1	1075
LAMC2|B2T|BM600|CSF|EBR2|EBR2A|LAMB2T|LAMNB2|-|1q25.3|protein-coding	cl1	3918
RNF126|-|-|19p13.3|protein-coding	cl1	55658
NUDT4P2|-|-|1q21.1|pseudo	cl1	170688
ABCB9|EST122234|TAPL|-|12q24.31|protein-coding	cl1	23457
ENG|END|HHT1|ORW1|-|9q34.11|protein-coding	cl1	2022
F11R|CD321|JAM|JAM1|JAMA|JCAM|KAT|PAM-1|-|1q23.3|protein-coding	cl1	50848
CD3EAP|ASE-1|ASE1|CAST|PAF49|-|19q13.32|protein-coding	cl1	10849
HIPK2|PRO0593|-|7q34|protein-coding	cl1	28996
GRB14|-|-|2q24.3|protein-coding	cl1	2888
FERMT1|C20orf42|DTGCU2|KIND1|UNC112A|URP1|-|20p12.3|protein-coding	cl1	55612
ADAMTS3|ADAMTS-4|-|4q13.3|protein-coding	cl1	9508
NUDT4P1|-|-|1q21.2|pseudo	cl1	440672
ADAMTS7|ADAM-TS 7|ADAM-TS7|ADAMTS-7|-|15q25.1|protein-coding	cl1	11173
FTH1|FHC|FTH|FTHL6|HFE5|PIG15|PLIF|-|11q12.3|protein-coding	cl1	2495
PTGIR|IP|PRIPR|-|19q13.32|protein-coding	cl1	5739
IFITM3|1-8U|DSPA2b|IP15|-|11p15.5|protein-coding	cl1	10410
ADAMTS1|C3-C5|METH1|-|21q21.3|protein-coding	cl1	9510
SNORA18|ACA18|-|11q21|snoRNA	cl1	677805
SCD|FADS5|MSTP008|SCD1|SCDOS|hSCD1|-|10q24.31|protein-coding	cl1	6319
MECOM|AML1-EVI-1|EVI1|KMT8E|MDS1|MDS1-EVI1|PRDM3|RUSAT2|-|3q26.2|protein-coding	cl1	2122
CFB|AHUS4|ARMD14|BF|BFD|CFAB|CFBD|FB|FBI12|GBG|H2-Bf|PBF2|-|6p21.33|protein-coding	cl1	629
MDK|ARAP|MK|NEGF2|-|11p11.2|protein-coding	cl1	4192
RPS29|DBA13|S29|-|14q21.3|protein-coding	cl1	6235
PRR7|-|-|5q35.3|protein-coding	cl1	80758
THEM4|CTMP|-|1q21.3|protein-coding	cl1	117145
PKDCC|SGK493|Vlk|-|2p21|protein-coding	cl1	91461
FGD6|ZFYVE24|-|12q22|protein-coding	cl1	55785
SLC39A8|BIGM103|CDG2N|LZT-Hs6|PP3105|ZIP8|-|4q24|protein-coding	cl1	64116
SLC29A1|ENT1|-|6p21.1|protein-coding	cl1	2030
FKBP1A-SDCBP2|-|-|20p13|ncRNA	cl1	100528031
POLR2J3|POLR2J2|RPB11b1|RPB11b2|-|7q22.1|protein-coding	cl1	548644
GTF2IRD2|FP630|GTF2IRD2 alpha|GTF2IRD2A|-|7q11.23|protein-coding	cl1	84163
CFH|AHUS1|AMBP1|ARMD4|ARMS1|CFHL3|FH|FHL1|HF|HF1|HF2|HUS|-|1q31.3|protein-coding	cl1	3075
GATA6|-|-|18q11.2|protein-coding	cl1	2627
RPL9|L9|NPC-A-16|-|4p14|protein-coding	cl1	6133
STC2|STC-2|STCRP|-|5q35.2|protein-coding	cl1	8614
BOLA2|BOLA2A|BOLA2B|My016|-|16p11.2|protein-coding	cl1	552900
SHROOM4|SHAP|-|Xp11.22|protein-coding	cl1	57477
FAM173A|C16orf24|-|16p13.3|protein-coding	cl1	65990
GALNT7|GALNAC-T7|GalNAcT7|-|4q34.1|protein-coding	cl1	51809
DNAJC25-GNG10|-|-|9q31.3|protein-coding	cl1	552891
RPL23A|L23A|MDA20|-|17q11.2|protein-coding	cl1	6147
GAB3|-|-|Xq28|protein-coding	cl1	139716
SERPINE1|PAI|PAI-1|PAI1|PLANH1|-|7q22.1|protein-coding	cl1	5054
FEZ1|UNC-76|-|11q24.2|protein-coding	cl1	9638
ADAM23|MDC-3|MDC3|-|2q33.3|protein-coding	cl1	8745
MESDC1|-|-|15q25.1|protein-coding	cl1	59274
LAMC1|LAMB2|-|1q25.3|protein-coding	cl1	3915
GBP4|Mpa2|-|1p22.2|protein-coding	cl1	115361
GPRC5A|GPCR5A|PEIG-1|RAI3|RAIG1|TIG1|-|12p13.1|protein-coding	cl1	9052
TNFAIP6|TSG-6|TSG6|-|2q23.3|protein-coding	cl1	7130
RPL21P28|RPL21_8_160|-|1q32.3|pseudo	cl1	100131205
SEL1L3|Sel-1L3|-|4p15.2|protein-coding	cl1	23231
FRMD5|-|-|15q15.3|protein-coding	cl1	84978
SLC12A7|KCC4|-|5p15.33|protein-coding	cl1	10723
SFXN2|-|-|10q24.32|protein-coding	cl1	118980
PLXNA4|FAYV2820|PLEXA4|PLXNA4A|PLXNA4B|PRO34003|-|7q32.3|protein-coding	cl1	91584
HSPB6|HEL55|Hsp20|PPP1R91|-|19q13.12|protein-coding	cl1	126393
NID2|NID-2|-|14q22.1|protein-coding	cl1	22795
EIF3C|EIF3CL|EIF3S8|eIF3-p110|-|16p11.2|protein-coding	cl1	8663
SNRPG|SMG|Sm-G|-|2p13.3|protein-coding	cl1	6637
CDC26|ANAPC12|APC12|C9orf17|-|9q32|protein-coding	cl1	246184
PSPH|PSP|PSPHD|-|7p11.2|protein-coding	cl1	5723
CBWD5|DC36|-|9q21.11|protein-coding	cl1	220869
CLCN4|CLC4|ClC-4|ClC-4A|MRX15|MRX49|-|Xp22.2|protein-coding	cl1	1183
PGAM1|HEL-S-35|PGAM-B|PGAMA|-|10q24.1|protein-coding	cl1	5223
RPS2|LLREP3|S2|-|16p13.3|protein-coding	cl1	6187
RPS7|DBA8|S7|-|2p25.3|protein-coding	cl1	6201
ALDH1A3|ALDH1A6|ALDH6|MCOP8|RALDH3|-|15q26.3|protein-coding	cl1	220
CLDN11|OSP|OTM|-|3q26.2|protein-coding	cl1	5010
FLJ23867|-|-|1q25.2|ncRNA	cl1	200058
PRKG1|AAT8|PKG|PRKG1B|PRKGR1B|cGK|cGK 1|cGK1|cGKI|cGKI-BETA|cGKI-alpha|-|10q11.23-q21.1|protein-coding	cl1	5592
PREX1|P-REX1|-|20q13.13|protein-coding	cl1	57580
PCDH9|-|-|13q21.32|protein-coding	cl1	5101
SLC4A7|NBC2|NBC3|NBCN1|SBC2|SLC4A6|-|3p24.1|protein-coding	cl1	9497
APBA2|D15S1518E|HsT16821|LIN-10|MGC:14091|MINT2|X11-BETA|X11L|-|15q13.1|protein-coding	cl1	321
NFIA|CTF|NF-I/A|NF1-A|NFI-A|NFI-L|-|1p31.3|protein-coding	cl1	4774
C1QTNF1|CTRP1|GIP|ZSIG37|-|17q25.3|protein-coding	cl1	114897
ITGA10|PRO827|-|1q21.1|protein-coding	cl1	8515
TMTC1|ARG99|OLF|TMTC1A|-|12p11.22|protein-coding	cl1	83857
COL4A2|ICH|POREN2|-|13q34|protein-coding	cl1	1284
UGCG|GCS|GLCT1|-|9q31.3|protein-coding	cl1	7357
ERAP1|A-LAP|ALAP|APPILS|ARTS-1|ARTS1|ERAAP|ERAAP1|PILS-AP|PILSAP|-|5q15|protein-coding	cl1	51752
CMTM7|CKLFSF7|-|3p22.3|protein-coding	cl1	112616
SYNPO|-|-|5q33.1|protein-coding	cl1	11346
KCTD12|C13orf2|PFET1|PFETIN|-|13q22.3|protein-coding	cl1	115207
SNORD49B|U49B|-|17p11.2|snoRNA	cl1	692087
TVP23C|FAM18B2|-|17p12|protein-coding	cl1	201158
IL15RA|CD215|-|10p15.1|protein-coding	cl1	3601
SPRY2|IGAN3|hSPRY2|-|13q31.1|protein-coding	cl1	10253
KRT18|CK-18|CYK18|K18|-|12q13.13|protein-coding	cl1	3875
KSR1|KSR|RSU2|-|17q11.2|protein-coding	cl1	8844
ESM1|endocan|-|5q11.2|protein-coding	cl1	11082
LTBP1|-|-|2p22.3|protein-coding	cl1	4052
GNG10|-|-|9q31.3|protein-coding	cl1	2790
EIF4B|EIF-4B|PRO1843|-|12q13.13|protein-coding	cl1	1975
PRKCH|PKC-L|PKCL|PRKCL|nPKC-eta|-|14q23.1|protein-coding	cl1	5583
ADGRL4|ELTD1|ETL|KPG_003|-|1p31.1|protein-coding	cl1	64123
ARSK|TSULF|-|5q15|protein-coding	cl1	153642
ABCA6|EST155051|-|17q24.2-q24.3|protein-coding	cl1	23460
SPCS2|-|-|11q13.4|protein-coding	cl1	9789
GTF2H2C_2|GTF2H2D|-|5q13.2|protein-coding	cl1	730394
TLE1|ESG|ESG1|GRG1|-|9q21.32|protein-coding	cl1	7088
PI4KAP2|-|-|22q11.21|pseudo	cl1	375133
NUDT14|UGPP|UGPPase|-|14q32.33|protein-coding	cl1	256281
SLC25A22|EIEE3|GC-1|GC1|NET44|-|11p15.5|protein-coding	cl1	79751
FOXC2|FKHL14|LD|MFH-1|MFH1|-|16q24.1|protein-coding	cl1	2303
NDUFA4L2|NUOMS|-|12q13.3|protein-coding	cl1	56901
LXN|ECI|TCI|-|3q25.32|protein-coding	cl1	56925
SPCS3|PRO3567|SPC22/23|SPC3|YLR066W|-|4q34.2|protein-coding	cl1	60559
SLC2A13|HMIT|-|12q12|protein-coding	cl1	114134
TPK1|HTPK1|PP20|THMD5|-|7q35|protein-coding	cl1	27010
C16orf74|-|-|16q24.1|protein-coding	cl1	404550
MCC|MCC1|-|5q22.2|protein-coding	cl1	4163
CEBPB|C/EBP-beta|IL6DBP|NF-IL6|TCF5|-|20q13.13|protein-coding	cl1	1051
C1orf54|-|-|1q21.2|protein-coding	cl1	79630
PDPN|AGGRUS|GP36|GP40|Gp38|HT1A-1|OTS8|PA2.26|T1A|T1A-2|T1A2|TI1A|-|1p36.21|protein-coding	cl1	10630
PRKX|PKX1|-|Xp22.33|protein-coding	cl1	5613
TMTC4|-|-|13q32.3|protein-coding	cl1	84899
CELF2|BRUNOL3|CELF-2|CUG-BP2|CUGBP2|ETR-3|ETR3|NAPOR|-|10p14|protein-coding	cl1	10659
UCHL1|HEL-117|HEL-S-53|NDGOA|PARK5|PGP 9.5|PGP9.5|PGP95|Uch-L1|-|4p13|protein-coding	cl1	7345
PHLDA1|DT1P1B11|PHRIP|TDAG51|-|12q21.2|protein-coding	cl1	22822
LRCH2|dA204F4.4|-|Xq23|protein-coding	cl1	57631
MYH10|NMMHC-IIB|NMMHCB|-|17p13.1|protein-coding	cl1	4628
PIR|-|-|Xp22.2|protein-coding	cl1	8544
CDK14|PFTAIRE1|PFTK1|-|7q21.13|protein-coding	cl1	5218
EGFL7|NEU1|VE-STATIN|ZNEU1|-|9q34.3|protein-coding	cl1	51162
B4GALT6|B4Gal-T6|beta4Gal-T6|-|18q12.1|protein-coding	cl1	9331
EVA1C|B18|B19|C21orf63|C21orf64|FAM176C|PRED34|SUE21|-|21q22.11|protein-coding	cl1	59271
F8A3|-|-|Xq28|protein-coding	cl1	474384
MMP14|MMP-14|MMP-X1|MT-MMP|MT-MMP 1|MT1-MMP|MT1MMP|MTMMP1|WNCHRS|-|14q11.2|protein-coding	cl1	4323
MSC-AS1|-|-|8q13.3-q21.11|ncRNA	cl1	100132891
TMTC2|IBDBP1|-|12q21.31|protein-coding	cl1	160335
AVEN|PDCD12|-|15q14|protein-coding	cl1	57099
TM4SF1|H-L6|L6|M3S1|TAAL6|-|3q25.1|protein-coding	cl1	4071
EPAS1|ECYT4|HIF2A|HLF|MOP2|PASD2|bHLHe73|-|2p21|protein-coding	cl1	2034
TLR4|ARMD10|CD284|TLR-4|TOLL|-|9q33.1|protein-coding	cl1	7099
SRM|PAPT|SPDSY|SPS1|SRML1|-|1p36.22|protein-coding	cl1	6723
POSTN|OSF-2|OSF2|PDLPOSTN|PN|-|13q13.3|protein-coding	cl1	10631
C4orf48|CHR4_55|-|4p16.3|protein-coding	cl1	401115
MIR3655|-|-|5q31.3|ncRNA	cl1	100500820
MICAL2|MICAL-2|MICAL2PV1|MICAL2PV2|-|11p15.3|protein-coding	cl1	9645
PLSCR4|TRA1|-|3q24|protein-coding	cl1	57088
NOMO2|Nomo|PM5|-|16p12.3|protein-coding	cl1	283820
IL6|BSF-2|BSF2|CDF|HGF|HSF|IFN-beta-2|IFNB2|IL-6|-|7p15.3|protein-coding	cl1	3569
TOR4A|C9orf167|-|9q34.3|protein-coding	cl1	54863
SARDH|BPR-2|DMGDHL1|SAR|SARD|SDH|-|9q34.2|protein-coding	cl1	1757
FAM156B|TMEM29B|-|Xp11.22|protein-coding	cl1	727866
RABL2A|-|-|2q14.1|protein-coding	cl1	11159
ROBO1|DUTT1|SAX3|-|3p12.3|protein-coding	cl1	6091
MIR4721|-|-|16p11.2|ncRNA	cl1	100616256
PAPSS2|ATPSK2|BCYM4|SK2|-|10q23.2-q23.31|protein-coding	cl1	9060
TNFRSF21|BM-018|CD358|DR6|-|6p12.3|protein-coding	cl1	27242
ELOVL6|FACE|FAE|LCE|-|4q25|protein-coding	cl1	79071
APOL1|APO-L|APOL|APOL-I|FSGS4|-|22q12.3|protein-coding	cl1	8542
ENDOD1|-|-|11q21|protein-coding	cl1	23052
ENOX1|CNOX|PIG38|bA64J21.1|cCNOX|-|13q14.11|protein-coding	cl1	55068
IL33|C9orf26|DVS27|IL1F11|NF-HEV|NFEHEV|-|9p24.1|protein-coding	cl1	90865
PLD1|-|-|3q26.31|protein-coding	cl1	5337
RPS6KA2|HU-2|MAPKAPK1C|RSK|RSK3|S6K-alpha|S6K-alpha2|p90-RSK3|p90RSK2|pp90RSK3|-|6q27|protein-coding	cl1	6196
MIR1244-4|hsa-mir-1244-4|-|12p13.2|ncRNA	cl1	103504734
INHBA|EDF|FRP|-|7p14.1|protein-coding	cl1	3624
C8orf4|TC-1|TC1|-|8p11.21|protein-coding	cl1	56892
NMNAT2|C1orf15|PNAT2|-|1q25.3|protein-coding	cl1	23057
LTBP4|ARCL1C|LTBP-4|LTBP4L|LTBP4S|-|19q13.2|protein-coding	cl1	8425
FAR2|HEL-S-81|MLSTD1|SDR10E2|-|12p11.22|protein-coding	cl1	55711
FAM198B|AD021|AD036|C4orf18|ENED|-|4q32.1|protein-coding	cl1	51313
LRRC17|P37NB|-|7q22.1|protein-coding	cl1	10234
DOCK4|-|-|7q31.1|protein-coding	cl1	9732
FRY|13CDNA73|214K23.2|C13orf14|CG003|bA207N4.2|bA37E23.1|-|13q13.1|protein-coding	cl1	10129
SPRY1|hSPRY1|-|4q28.1|protein-coding	cl1	10252
MARCKSL1|F52|MACMARCKS|MLP|MLP1|MRP|-|1p35.1|protein-coding	cl1	65108
TLR6|CD286|-|4p14|protein-coding	cl1	10333
ZNF117|H-plk|HPF9|-|7q11.21|protein-coding	cl1	51351
SREBF1|SREBP-1c|SREBP1|SREBP1a|bHLHd1|-|17p11.2|protein-coding	cl1	6720
SNTB1|59-DAP|A1B|BSYN2|DAPA1B|SNT2|SNT2B1|TIP-43|-|8q24.12|protein-coding	cl1	6641
IFI30|GILT|IFI-30|IP-30|IP30|-|19p13.11|protein-coding	cl1	10437
SMO|CRJS|FZD11|Gx|SMOH|-|7q32.1|protein-coding	cl1	6608
CASP4|ICE(rel)II|ICEREL-II|ICH-2|Mih1|Mih1/TX|TX|-|11q22.3|protein-coding	cl1	837
RPSAP58|RPSA_30_1642|-|19p12|pseudo	cl1	388524
BTBD11|ABTB2B|-|12q23.3|protein-coding	cl1	121551
ZNF697|-|-|1p12|protein-coding	cl1	90874
SLC20A1|GLVR1|Glvr-1|PIT1|PiT-1|-|2q14.1|protein-coding	cl1	6574
PLAUR|CD87|U-PAR|UPAR|URKR|-|19q13.31|protein-coding	cl1	5329
B3GALT2|BETA3GALT2|GLCT2|beta3Gal-T2|-|1q31.2|protein-coding	cl1	8707
RPL15|DBA12|EC45|L15|RPL10|RPLY10|RPYL10|-|3p24.2|protein-coding	cl1	6138
PLA2G4A|PLA2G4|cPLA2|cPLA2-alpha|-|1q31.1|protein-coding	cl1	5321
RHOBTB3|-|-|5q15|protein-coding	cl1	22836
FJX1|-|-|11p13|protein-coding	cl1	24147
BOLA2B|BOLA2|-|16p11.2|protein-coding	cl1	654483
IGFBP7|AGM|FSTL2|IBP-7|IGFBP-7|IGFBP-7v|IGFBPRP1|MAC25|PSF|RAMSVPS|TAF|-|4q12|protein-coding	cl1	3490
CBSL|-|-|21p12|protein-coding	cl1	102724560
SERBP1|CGI-55|CHD3IP|HABP4L|PAI-RBP1|PAIRBP1|-|1p31.3|protein-coding	cl1	26135
GPX3|GPx-P|GSHPx-3|GSHPx-P|-|5q33.1|protein-coding	cl1	2878
GSTO1|GSTO 1-1|GSTTLp28|HEL-S-21|P28|SPG-R|-|10q25.1|protein-coding	cl1	9446
IL11|AGIF|IL-11|-|19q13.42|protein-coding	cl1	3589
SUSD5|-|-|3p22.3|protein-coding	cl1	26032
RPL7|L7|humL7-1|-|8q21.11|protein-coding	cl1	6129
EIF2S2|EIF2|EIF2B|EIF2beta|PPP1R67|eIF-2-beta|-|20q11.22|protein-coding	cl1	8894
CHAC2|-|-|2p16.2|protein-coding	cl1	494143
KLHL5|-|-|4p14|protein-coding	cl1	51088
PLAU|ATF|BDPLT5|QPD|UPA|URK|u-PA|-|10q22.2|protein-coding	cl1	5328
SMAD3|HSPC193|HsT17436|JV15-2|LDS1C|LDS3|MADH3|-|15q22.33|protein-coding	cl1	4088
MSTO1|LST005|MST|-|1q22|protein-coding	cl1	55154
ITGB8|-|-|7p21.1|protein-coding	cl1	3696
MIR6797|hsa-mir-6797|-|19q13.2|ncRNA	cl1	102465478
CRYL1|GDH|HEL30|lambda-CRY|-|13q12.11|protein-coding	cl1	51084
MIR3652|-|-|12q23.3|ncRNA	cl1	100500842
APBB2|FE65L|FE65L1|-|4p14-p13|protein-coding	cl1	323
FAM212B|C1orf183|-|1p13.2|protein-coding	cl1	55924
CDKN2A|ARF|CDK4I|CDKN2|CMM2|INK4|INK4A|MLM|MTS-1|MTS1|P14|P14ARF|P16|P16-INK4A|P16INK4|P16INK4A|P19|P19ARF|TP16|-|9p21.3|protein-coding	cl1	1029
SNORD86|U86|-|20p13|snoRNA	cl1	692201
GALNT1|GALNAC-T1|-|18q12.2|protein-coding	cl1	2589
BMP6|VGR|VGR1|-|6p24.3|protein-coding	cl1	654
ARHGAP18|MacGAP|SENEX|bA307O14.2|-|6q22.33|protein-coding	cl1	93663
LOC100126784|-|-|11p15.1|ncRNA	cl1	100126784
FAM83H|AI3|-|8q24.3|protein-coding	cl1	286077
NOX4|KOX|KOX-1|RENOX|-|11q14.3|protein-coding	cl1	50507
ATP11A|ATPIH|ATPIS|-|13q34|protein-coding	cl1	23250
MAP3K7CL|C21orf7|HC21ORF7|TAK1L|TAKL|TAKL-1|TAKL-2|TAKL-4|-|21q21.3|protein-coding	cl1	56911
NPAS2|MOP4|PASD4|bHLHe9|-|2q11.2|protein-coding	cl1	4862
BCL3|BCL4|D19S37|-|19q13.32|protein-coding	cl1	602
HMGN1|HMG14|-|21q22.2|protein-coding	cl1	3150
FABP5|E-FABP|EFABP|KFABP|PA-FABP|PAFABP|-|8q21.13|protein-coding	cl1	2171
MEDAG|AWMS3|C13orf33|MEDA-4|MEDA4|hAWMS3|-|13q12.3|protein-coding	cl1	84935
CEP170|FAM68A|KAB|KIAA0470|-|1q43|protein-coding	cl1	9859
COL4A5|ASLN|ATS|CA54|-|Xq22.3|protein-coding	cl1	1287
SVIP|-|-|11p14.3|protein-coding	cl1	258010
C5orf46|SSSP1|-|5q32|protein-coding	cl1	389336
CDH6|CAD6|KCAD|-|5p13.3|protein-coding	cl1	1004
CYCS|CYC|HCS|THC4|-|7p15.3|protein-coding	cl1	54205
CTSS|-|-|1q21.3|protein-coding	cl1	1520
CPNE8|-|-|12q12|protein-coding	cl1	144402
PIR-FIGF|-|-|Xp22.2|ncRNA	cl1	100532742
LAMA1|LAMA|PTBHS|S-LAM-alpha|-|18p11.31|protein-coding	cl1	284217
HNRNPA1|ALS19|ALS20|HNRPA1|HNRPA1L3|IBMPFD3|UP 1|hnRNP A1|hnRNP-A1|-|12q13.13|protein-coding	cl1	3178
PARP8|ARTD16|pART16|-|5q11.1|protein-coding	cl1	79668
CACNA2D1|CACNA2|CACNL2A|CCHL2A|LINC01112|lncRNA-N3|-|7q21.11|protein-coding	cl1	781
DMD|BMD|CMD3B|DXS142|DXS164|DXS206|DXS230|DXS239|DXS268|DXS269|DXS270|DXS272|MRX85|-|Xp21.2-p21.1|protein-coding	cl1	1756
FST|FS|-|5q11.2|protein-coding	cl1	10468
RPL22|EAP|HBP15|HBP15/L22|L22|-|1p36.31|protein-coding	cl1	6146
KIAA1671|-|-|22q11.23|protein-coding	cl1	85379
THBD|AHUS6|BDCA3|CD141|THPH12|THRM|TM|-|20p11.21|protein-coding	cl1	7056
VEPH1|MELT|VEPH|-|3q25.31-q25.32|protein-coding	cl1	79674
RPL6|L6|SHUJUN-2|TAXREB107|TXREB1|-|12q24.13|protein-coding	cl1	6128
NAMPT|1110035O14Rik|PBEF|PBEF1|VF|VISFATIN|-|7q22.3|protein-coding	cl1	10135
GPRC5B|RAIG-2|RAIG2|-|16p12.3|protein-coding	cl1	51704
LAMB1|CLM|LIS5|-|7q31.1|protein-coding	cl1	3912
MIR1244-2|-|-|5q23.1|ncRNA	cl1	100422885
CXCL1|FSP|GRO1|GROa|MGSA|MGSA-a|NAP-3|SCYB1|-|4q13.3|protein-coding	cl1	2919
LOC645166|-|-|1q21.1|pseudo	cl1	645166
EFNA5|AF1|EFL5|EPLG7|GLC1M|LERK7|RAGS|-|5q21.3|protein-coding	cl1	1946
TMA7|CCDC72|HSPC016|-|3p21.31|protein-coding	cl1	51372
BOP1|-|-|8q24.3|protein-coding	cl1	23246
MGC72080|-|-|7q21.3|pseudo	cl1	389538
EEF1A1|CCS-3|CCS3|EE1A1|EEF-1|EEF1A|EF-Tu|EF1A|GRAF-1EF|HNGC:16303|LENG7|PTI1|eEF1A-1|-|6q13|protein-coding	cl1	1915
ZC3H12A|MCPIP|MCPIP-1|MCPIP1|Reg1|dJ423B22.1|-|1p34.3|protein-coding	cl1	80149
NPTX1|NP1|-|17q25.3|protein-coding	cl1	4884
ACO1|ACONS|HEL60|IREB1|IREBP|IREBP1|IRP1|-|9p21.1|protein-coding	cl1	48
VASH1|KIAA1036|-|14q24.3|protein-coding	cl1	22846
MIR6805|hsa-mir-6805|-|19q13.42|ncRNA	cl1	102465483
LYPD1|LYPDC1|PHTS|-|2q21.2|protein-coding	cl1	116372
CDCP1|CD318|SIMA135|TRASK|-|3p21.31|protein-coding	cl1	64866
PDIA3P1|ERp60|GRP58P|PDIA3P|-|1q21.1|pseudo	cl1	171423
NBPF12|COAS1|KIAA1245|-|1q21.1|protein-coding	cl1	149013
RELB|I-REL|IREL|REL-B|-|19q13.32|protein-coding	cl2	5971
LACC1|C13orf31|FAMIN|-|13q14.11|protein-coding	cl2	144811
ASAH2B|ASAH2C|ASAH2L|bA449O16.3|bA98I6.3|-|10q11.23|protein-coding	cl2	653308
GFPT2|GFAT|GFAT 2|GFAT2|-|5q35.3|protein-coding	cl2	9945
RFFL|CARP-2|CARP2|FRING|RIFIFYLIN|RNF189|RNF34L|-|17q12|protein-coding	cl2	117584
GYPC|CD236|CD236R|GE|GPC|GPD|GYPD|PAS-2|PAS-2'|-|2q14.3|protein-coding	cl2	2995
SLC43A2|LAT4|-|17p13.3|protein-coding	cl2	124935
BHLHE40|BHLHB2|Clast5|DEC1|HLHB2|SHARP-2|SHARP2|STRA13|Stra14|-|3p26.1|protein-coding	cl2	8553
NFKBIE|IKBE|-|6p21.1|protein-coding	cl2	4794
HYOU1|GRP-170|Grp170|HSP12A|ORP-150|ORP150|-|11q23.3|protein-coding	cl2	10525
SDSL|SDH 2|SDS-RS1|TDH|cSDH|-|12q24.13|protein-coding	cl2	113675
RALGAPA1P1|GARNL2|GARNL2P|RALGAPA1P|bA235C23.1|-|9q31.2|pseudo	cl2	26134
HSD17B7|PRAP|SDR37C1|-|1q23.3|protein-coding	cl2	51478
SLC7A5|4F2LC|CD98|D16S469E|E16|LAT1|MPE16|-|16q24.2|protein-coding	cl2	8140
SH3RF2|HEPP1|POSHER|PPP1R39|RNF158|-|5q32|protein-coding	cl2	153769
ARL5A|ARFLP5|ARL5|-|2q23.3|protein-coding	cl2	26225
CHD7|CRG|HH5|IS3|KAL5|-|8q12.2|protein-coding	cl2	55636
ITPR1|ACV|CLA4|INSP3R1|IP3R|IP3R1|PPP1R94|SCA15|SCA16|SCA29|-|3p26.1|protein-coding	cl2	3708
PELI1|-|-|2p14|protein-coding	cl2	57162
MARS2|COXPD25|MetRS|mtMetRS|-|2q33.1|protein-coding	cl2	92935
SOX4|EVI16|-|6p22.3|protein-coding	cl2	6659
PPAT|ATASE|GPAT|PRAT|-|4q12|protein-coding	cl2	5471
KCNG1|K13|KCNG|KV6.1|kH2|-|20q13.13|protein-coding	cl2	3755
TET3|hCG_40738|-|2p13.1|protein-coding	cl2	200424
OPN3|ECPN|PPP1R116|-|1q43|protein-coding	cl2	23596
INSIG1|CL6|-|7q36.3|protein-coding	cl2	3638
ITGAV|CD51|MSK8|VNRA|VTNR|-|2q32.1|protein-coding	cl2	3685
PHC1|EDR1|HPH1|MCPH11|RAE28|-|12p13.31|protein-coding	cl2	1911
TMEM35A|TMEM35|-|Xq22.1|protein-coding	cl2	59353
RHPN2|P76RBE|RHOBP|-|19q13.11|protein-coding	cl2	85415
CENPV|3110013H01Rik|CENP-V|PRR6|p30|-|17p11.2|protein-coding	cl2	201161
GULP1|CED-6|CED6|GULP|-|2q32.1-q32.2|protein-coding	cl2	51454
PLS3|BMND18|T-plastin|-|Xq23|protein-coding	cl2	5358
TXNRD1|GRIM-12|TR|TR1|TRXR1|TXNR|-|12q23.3|protein-coding	cl2	7296
UHRF1BP1|C6orf107|ICBP90|dJ349A12.1|-|6p21.31|protein-coding	cl2	54887
EIF1AX|EIF1A|EIF1AP1|EIF4C|eIF-1A|eIF-4C|-|Xp22.12|protein-coding	cl2	1964
GDF15|GDF-15|MIC-1|MIC1|NAG-1|PDF|PLAB|PTGFB|-|19p13.11|protein-coding	cl2	9518
TRIM47|GOA|RNF100|-|17q25.1|protein-coding	cl2	91107
PRR13|TXR1|-|12q13.13|protein-coding	cl2	54458
CBX4|NBP16|PC2|-|17q25.3|protein-coding	cl2	8535
PSTPIP2|MAYP|-|18q21.1|tdb7990|protein-coding	cl2	9050
NINJ1|NIN1|NINJURIN|-|9q22.31|protein-coding	cl2	4814
SRGN|PPG|PRG|PRG1|-|10q22.1|protein-coding	cl2	5552
S1PR2|AGR16|DFNB68|EDG-5|EDG5|Gpcr13|H218|LPB2|S1P2|-|19p13.2|protein-coding	cl2	9294
HES4|bHLHb42|-|1p36.33|protein-coding	cl2	57801
ZNF771|DSC43|-|16p11.2|protein-coding	cl2	51333
RBM38|HSRNASEB|RNPC1|SEB4B|SEB4D|dJ800J21.2|-|20q13.31|protein-coding	cl2	55544
USP6NL|RNTRE|TRE2NL|USP6NL-IT1|-|10p14|protein-coding	cl2	9712
ENTPD7|LALP1|-|10q24.2|protein-coding	cl2	57089
ALG10B|ALG10|KCR1|-|12q12|protein-coding	cl2	144245
HAS3|-|-|16q22.1|protein-coding	cl2	3038
ZNF850|ZNF850P|-|19q13.12|protein-coding	cl2	342892
RAB11FIP1|NOEL1A|RCP|rab11-FIP1|-|8p11.23|protein-coding	cl2	80223
SOX13|ICA12|Sox-13|-|1q32.1|protein-coding	cl2	9580
ANKRD50|-|-|4q28.1|protein-coding	cl2	57182
HSPD1|CPN60|GROEL|HLD4|HSP-60|HSP60|HSP65|HuCHA60|SPG13|-|2q33.1|protein-coding	cl2	3329
RNF122|-|-|8p12|protein-coding	cl2	79845
C3orf58|DIA1|GoPro49|HASF|-|3q24|protein-coding	cl2	205428
NR2F2|ARP1|CHTD4|COUPTFB|COUPTFII|NF-E3|NR2F1|SVP40|TFCOUP2|-|15q26.2|protein-coding	cl2	7026
LOC100133091|-|-|7q11.23|ncRNA	cl2	100133091
TMEM51|C1orf72|-|1p36.21|protein-coding	cl2	55092
PHKA1|PHKA|-|Xq13.1|protein-coding	cl2	5255
POMK|MDDGA12|MDDGC12|SGK196|-|8p11.21|protein-coding	cl2	84197
RALGAPA1|GARNL1|GRIPE|RalGAPalpha1|TULIP1|p240|-|14q13.2|protein-coding	cl2	253959
PLCL1|PLCE|PLCL|PLDL1|PPP1R127|PRIP|-|2q33.1|protein-coding	cl2	5334
TMEM183A|C1orf37|-|1q32.1|protein-coding	cl2	92703
SNORA105A|-|-|5p14.3|snoRNA	cl2	106635539
ASNS|ASNSD|TS11|-|7q21.3|protein-coding	cl2	440
ST3GAL1|Gal-NAc6S|SIAT4A|SIATFL|ST3GalA|ST3GalA.1|ST3GalIA|ST3GalIA,1|ST3O|-|8q24.22|protein-coding	cl2	6482
RGS20|RGSZ1|ZGAP1|g(z)GAP|gz-GAP|-|8q11.23|protein-coding	cl2	8601
TPBG|5T4|5T4AG|M6P1|WAIF1|-|6q14.1|protein-coding	cl2	7162
B4GALT5|B4Gal-T5|BETA4-GALT-IV|beta4Gal-T5|beta4GalT-V|gt-V|-|20q13.13|protein-coding	cl2	9334
SMOX|C20orf16|PAO|PAO-1|PAO1|PAOH|PAOH1|SMO|-|20p13|protein-coding	cl2	54498
ETNK1|EKI|EKI 1|EKI1|Nbla10396|-|12p12.1|protein-coding	cl2	55500
CYFIP2|PIR121|-|5q33.3|protein-coding	cl2	26999
L3MBTL3|MBT-1|MBT1|-|6q23.1|protein-coding	cl2	84456
B3GNT2|3-Gn-T1|3-Gn-T2|B3GN-T2|B3GNT|B3GNT-2|B3GNT1|BETA3GNT|BGNT2|BGnT-2|beta-1|beta3Gn-T1|beta3Gn-T2|-|2p15|protein-coding	cl2	10678
DHRS3|DD83.1|RDH17|Rsdr1|SDR1|SDR16C1|retSDR1|-|1p36.21|protein-coding	cl2	9249
ZNF579|-|-|19q13.42|protein-coding	cl2	163033
HERC6|-|-|4q22.1|protein-coding	cl2	55008
MIPOL1|CCDC193|-|14q13.3-q21.1|protein-coding	cl2	145282
ARRB1|ARB1|ARR1|-|11q13.4|protein-coding	cl2	408
TMEM64|-|-|8q21.3|protein-coding	cl2	169200
IL6ST|CD130|CDW130|GP130|IL-6RB|-|5q11.2|protein-coding	cl2	3572
RFK|RIFK|-|9q21.13|protein-coding	cl2	55312
PDLIM5|ENH|ENH1|L9|LIM|-|4q22.3|protein-coding	cl2	10611
ENC1|CCL28|ENC-1|KLHL35|KLHL37|NRPB|PIG10|TP53I10|-|5q13.3|protein-coding	cl2	8507
EDN1|ARCND3|ET1|HDLCQ7|PPET1|QME|-|6p24.1|protein-coding	cl2	1906
ADAT3|FWP005|MRT36|MST121|MSTP121|S863-5|TAD3|-|19p13.3|protein-coding	cl2	113179
GPAT3|AGPAT 10|AGPAT10|AGPAT8|AGPAT9|HMFN0839|LPAAT-theta|MAG1|-|4q21.23|protein-coding	cl2	84803
FOXO3B|FKHRL1P1|ZNF286C|-|17p11.2|pseudo	cl2	2310
HOMER1|HOMER|HOMER1A|HOMER1B|HOMER1C|SYN47|Ves-1|-|5q14.1|protein-coding	cl2	9456
STARD4|-|-|5q22.1|protein-coding	cl2	134429
SPATS2|Nbla00526|P59SCR|SCR59|SPATA10|-|12q13.12|protein-coding	cl2	65244
TMEM182|-|-|2q12.1|protein-coding	cl2	130827
MVD|FP17780|MDDase|MPD|POROK7|-|16q24.2|protein-coding	cl2	4597
ANGPTL4|ARP4|FIAF|HARP|HFARP|NL2|PGAR|TGQTL|UNQ171|pp1158|-|19p13.2|protein-coding	cl2	51129
YES1|HsT441|P61-YES|Yes|c-yes|-|18p11.32|protein-coding	cl2	7525
ATP13A2|CLN12|HSA9947|KRPPD|PARK9|-|1p36.13|protein-coding	cl2	23400
PYGO1|-|-|15q21.3|protein-coding	cl2	26108
EXOC6|EXOC6A|SEC15|SEC15L|SEC15L1|SEC15L3|Sec15p|-|10q23.33|protein-coding	cl2	54536
PPP1R2|IPP-2|IPP2|-|3q29|protein-coding	cl2	5504
LRIG1|LIG-1|LIG1|-|3p14.1|protein-coding	cl2	26018
RAB20|-|-|13q34|protein-coding	cl2	55647
LIMS1|PINCH|PINCH-1|PINCH1|-|2q12.3|protein-coding	cl2	3987
PAIP1|-|-|5p12|protein-coding	cl2	10605
NCR3LG1|B7-H6|B7H6|DKFZp686O24166|-|11p15.1|protein-coding	cl2	374383
ZSWIM4|-|-|19p13.13-p13.12|protein-coding	cl2	65249
ZNF322|HCG12|ZNF322A|ZNF388|ZNF489|-|6p22.2|protein-coding	cl2	79692
ZFPM1|FOG|FOG1|ZC2HC11A|ZNF408|ZNF89A|-|16q24.2|protein-coding	cl2	161882
SLC15A3|OCTP|PHT2|PTR3|-|11q12.2|protein-coding	cl2	51296
COL4A1|BSVD|RATOR|-|13q34|protein-coding	cl2	1282
SERPINB9|CAP-3|CAP3|PI-9|PI9|-|6p25.2|protein-coding	cl2	5272
ZC3H12C|MCPIP3|-|11q22.3|protein-coding	cl2	85463
PAG1|CBP|PAG|-|8q21.13|protein-coding	cl2	55824
MAST4|-|-|5q12.3|protein-coding	cl2	375449
GMPR|GMPR 1|GMPR1|-|6p22.3|protein-coding	cl2	2766
CDK17|PCTAIRE2|PCTK2|-|12q23.1|protein-coding	cl2	5128
FAM45A|-|-|10q26.11|protein-coding	cl2	404636
SLC25A33|BMSC-MCP|PNC1|-|1p36.22|protein-coding	cl2	84275
TNFAIP8L3|TIPE3|-|15q21.2|protein-coding	cl2	388121
PELI2|-|-|14q22.3|protein-coding	cl2	57161
OGFRL1|dJ331H24.1|-|6q13|protein-coding	cl2	79627
KLF9|BTEB|BTEB1|-|9q21.12|protein-coding	cl2	687
FAM60A|C12orf14|L4|TERA|-|12p11.21|protein-coding	cl2	58516
KIF13B|GAKIN|-|8p12|protein-coding	cl2	23303
SH3BGR|21-GARP|-|21q22.2|protein-coding	cl2	6450
TMEM183B|C1orf37-DUP|-|3q25.1|protein-coding	cl2	653659
FZD8|FZ-8|hFZ8|-|10p11.21|protein-coding	cl2	8325
CDKN2B|CDK4I|INK4B|MTS2|P15|TP15|p15INK4b|-|9p21.3|protein-coding	cl2	1030
FAM45BP|FAM45B|HT011|-|Xq26.1|pseudo	cl2	55855
RNF138|HSD-4|NARF|STRIN|hNARF|-|18q12.1|protein-coding	cl2	51444
FOXK1|FOXK1L|-|7p22.1|protein-coding	cl2	221937
IL17RD|HH18|IL-17RD|IL17RLM|SEF|-|3p14.3|protein-coding	cl2	54756
ADAMTS12|PRO4389|-|5p13.3-p13.2|protein-coding	cl2	81792
EVI5|EVI-5|NB4S|-|1p22.1|protein-coding	cl2	7813
PNP|NP|PRO1837|PUNP|-|14q11.2|protein-coding	cl2	4860
GAB2|-|-|11q14.1|protein-coding	cl2	9846
CCDC69|-|-|5q33.1|protein-coding	cl2	26112
LOC654342|-|-|2p11.2|pseudo	cl2	654342
MSMO1|DESP4|ERG25|MCCPD|SC4MOL|-|4q32.3|protein-coding	cl2	6307
STRIP2|FAM40B|FAR11B|-|7q32.1|protein-coding	cl2	57464
KIF21A|CFEOM1|FEOM1|FEOM3A|-|12q12|protein-coding	cl2	55605
FOXP4|hFKHLA|-|6p21.1|protein-coding	cl2	116113
CAB39L|MO25-BETA|MO2L|bA103J18.3|-|13q14.2|protein-coding	cl2	81617
CTU1|ATPBD3|NCS6|-|19q13.41|protein-coding	cl2	90353
FBLIM1|CAL|FBLP-1|FBLP1|-|1p36.21|protein-coding	cl2	54751
FAM117B|ALS2CR13|-|2q33.2|protein-coding	cl2	150864
MTRF1L|HMRF1L|MRF1L|mtRF1a|-|6q25.2|protein-coding	cl2	54516
AGFG1|HRB|RAB|RIP|-|2q36.3|protein-coding	cl2	3267
SLC13A3|NADC3|SDCT2|-|20q13.12|protein-coding	cl2	64849
SPRY4|HH17|-|5q31.3|protein-coding	cl2	81848
TBX2|-|-|17q23.2|protein-coding	cl2	6909
HS2ST1|dJ604K5.2|-|1p22.3|protein-coding	cl2	9653
RAB43|RAB11B|RAB41|-|3q21.3|protein-coding	cl2	339122
DPYSL4|CRMP3|DRP-4|ULIP4|-|10q26.3|protein-coding	cl2	10570
TMEM164|bB360B22.3|-|Xq23|protein-coding	cl2	84187
ANTXR2|CMG-2|CMG2|HFS|ISH|JHF|-|4q21.21|protein-coding	cl2	118429
ZBTB10|RINZF|-|8q21.13|protein-coding	cl2	65986
CSNK2A1|CK2A1|CKII|CSNK2A3|OCNDS|-|20p13|protein-coding	cl2	1457
SVIL|-|-|10p11.23|protein-coding	cl2	6840
CTH|-|-|1p31.1|protein-coding	cl2	1491
LNX2|PDZRN1|-|13q12.2|protein-coding	cl2	222484
PPM1K|BDP|MSUDMV|PP2Ckappa|PP2Cm|PTMP|UG0882E07|-|4q22.1|protein-coding	cl2	152926
NSFP1|NSFP|-|17q21.31|pseudo	cl2	728806
TBC1D8|AD3|GRAMD8|HBLP1|TBC1D8A|VRP|-|2q11.2|protein-coding	cl2	11138
SLC45A3|IPCA-2|IPCA-6|IPCA-8|IPCA6|PCANAP2|PCANAP6|PCANAP8|PRST|-|1q32.1|protein-coding	cl2	85414
PMS2P5|PMS2L5|PMS7|-|7q11.23|pseudo	cl2	5383
TRIB1|C8FW|GIG-2|GIG2|SKIP1|TRB-1|TRB1|-|8q24.13|protein-coding	cl2	10221
MYC|MRTL|MYCC|bHLHe39|c-Myc|-|8q24.21|protein-coding	cl2	4609
ARRDC3|TLIMP|-|5q14.3|protein-coding	cl2	57561
ARHGAP42|GRAF3|-|11q22.1|protein-coding	cl2	143872
PIM3|pim-3|-|22q13.33|protein-coding	cl2	415116
PARP12|ARTD12|MST109|MSTP109|ZC3H1|ZC3HDC1|-|7q34|protein-coding	cl2	64761
HMGCS1|HMGCS|-|5p12|protein-coding	cl2	3157
LYN|JTK8|p53Lyn|p56Lyn|-|8q12.1|protein-coding	cl2	4067
ARMC10|PNAS-112|PNAS112|PSEC0198|SVH|-|7q22.1|protein-coding	cl2	83787
ZXDB|ZNF905|dJ83L6.1|-|Xp11.21|protein-coding	cl2	158586
SEC14L2|C22orf6|SPF|TAP|TAP1|-|22q12.2|protein-coding	cl2	23541
WARS|GAMMA-2|IFI53|IFP53|-|14q32.2|protein-coding	cl2	7453
PROSER2|C10orf47|-|10p14|protein-coding	cl2	254427
C9orf72|ALSFTD|DENNL72|FTDALS|FTDALS1|-|9p21.2|protein-coding	cl2	203228
SPSB1|SSB-1|SSB1|-|1p36.22|protein-coding	cl2	80176
NR2F1|BBOAS|BBSOAS|COUP-TFI|EAR-3|EAR3|ERBAL3|NR2F2|SVP44|TCFCOUP1|TFCOUP1|-|5q15|protein-coding	cl2	7025
SLC25A29|C14orf69|CACL|ORNT3|-|14q32.2|protein-coding	cl2	123096
ERN1|IRE1|IRE1P|IRE1a|hIRE1p|-|17q23.3|protein-coding	cl2	2081
MTHFD2|NMDMC|-|2p13.1|protein-coding	cl2	10797
ABCA1|ABC-1|ABC1|CERP|HDLDT1|TGD|-|9q31.1|protein-coding	cl2	19
POLR1B|RPA135|RPA2|Rpo1-2|-|2q14.1|protein-coding	cl2	84172
ISCA1|HBLD2|ISA1|hIscA|-|9q21.33|protein-coding	cl2	81689
KCTD20|C6orf69|dJ108K11.3|-|6p21.31|protein-coding	cl2	222658
SLC12A2|BSC|BSC2|NKCC1|PPP1R141|-|5q23.3|protein-coding	cl2	6558
MFSD2A|MCPH15|MFSD2|NLS1|-|1p34.2|protein-coding	cl2	84879
SLC19A2|TC1|THMD1|THT1|THTR1|TRMA|-|1q24.2|protein-coding	cl2	10560
ABRACL|C6orf115|Costars|HSPC280|PRO2013|-|6q24.1|protein-coding	cl2	58527
SLC2A3|GLUT3|-|12p13.31|protein-coding	cl2	6515
SQSTM1|A170|DMRV|FTDALS3|NADGP|OSIL|PDB3|ZIP3|p60|p62|p62B|-|5q35.3|protein-coding	cl2	8878
SDF2L1|-|-|22q11.21|protein-coding	cl2	23753
SGK1|SGK|-|6q23.2|protein-coding	cl2	6446
HDGFRP3|CGI-142|HDGF-2|HDGF2|HRP-3|-|15q25.2|protein-coding	cl2	50810
LDLR|FH|FHC|LDLCQ2|-|19p13.2|protein-coding	cl2	3949
WDR36|GLC1G|TA-WDRP|TAWDRP|UTP21|-|5q22.1|protein-coding	cl2	134430
MXD1|BHLHC58|MAD|MAD1|-|2p13.3|protein-coding	cl2	4084
POLR3G|RPC32|RPC7|-|5q14.3|protein-coding	cl2	10622
BID|FP497|-|22q11.21|protein-coding	cl2	637
SPTSSA|C14orf147|SSSPTA|-|14q13.1|protein-coding	cl2	171546
TNFRSF10B|CD262|DR5|KILLER|KILLER/DR5|TRAIL-R2|TRAILR2|TRICK2|TRICK2A|TRICK2B|TRICKB|ZTNFR9|-|8p21.3|protein-coding	cl2	8795
POM121C|POM121-2|-|7q11.23|protein-coding	cl2	100101267
PLD6|ZUC|-|17p11.2|protein-coding	cl2	201164
KRT8|CARD2|CK-8|CK8|CYK8|K2C8|K8|KO|-|12q13.13|protein-coding	cl2	3856
FOXO1|FKH1|FKHR|FOXO1A|-|13q14.11|protein-coding	cl2	2308
OCIAD2|-|-|4p11|protein-coding	cl2	132299
STAT4|SLEB11|-|2q32.2-q32.3|protein-coding	cl2	6775
YBX3|CSDA|CSDA1|DBPA|ZONAB|-|12p13.2|protein-coding	cl2	8531
FAM129A|C1orf24|GIG39|NIBAN|-|1q25.3|protein-coding	cl2	116496
NOCT|CCR4L|CCRN4L|Ccr4c|NOC|-|4q31.1|protein-coding	cl2	25819
SELENOT|SELT|-|3q25.1|protein-coding	cl2	51714
PSAT1|EPIP|NLS2|PSA|PSAT|PSATD|-|9q21.2|protein-coding	cl2	29968
MT1L|MT1|MT1R|MTF|-|16q13|pseudo	cl2	4500
ZNRF3|BK747E2.3|RNF203|-|22q12.1|protein-coding	cl2	84133
TRIM62|DEAR1|-|1p35.1|protein-coding	cl2	55223
KLHL13|BKLHD2|-|Xq24|protein-coding	cl2	90293
MAP4K3|GLK|MAPKKKK3|MEKKK 3|MEKKK3|RAB8IPL1|-|2p22.1|protein-coding	cl2	8491
PIK3C2A|CPK|PI3-K-C2(ALPHA)|PI3-K-C2A|PI3K-C2-alpha|PI3K-C2alpha|-|11p15.1|protein-coding	cl2	5286
IRAK2|IRAK-2|-|3p25.3|protein-coding	cl2	3656
TRIB3|C20orf97|NIPK|SINK|SKIP3|TRB3|-|20p13|protein-coding	cl2	57761
ADAM19|FKSG34|MADDAM|MLTNB|-|5q33.3|protein-coding	cl2	8728
BCR|ALL|BCR1|CML|D22S11|D22S662|PHL|-|22q11.23|protein-coding	cl2	613
ZPR1|ZNF259|-|11q23.3|protein-coding	cl2	8882
RAB3IP|RABIN3|RABIN8|-|12q15|protein-coding	cl2	117177
DOCK6|AOS2|ZIR1|-|19p13.2|protein-coding	cl2	57572
NHSL1|C6orf63|-|6q24.1|protein-coding	cl2	57224
EFNB1|CFND|CFNS|EFB1|EFL3|EPLG2|Elk-L|LERK2|-|Xq13.1|protein-coding	cl2	1947
FAM107B|C10orf45|HITS|-|10p13|protein-coding	cl2	83641
CREG1|CREG|-|1q24.2|protein-coding	cl2	8804
MAPRE3|EB3|EBF3|EBF3-S|RP3|-|2p23.3|protein-coding	cl2	22924
LDLRAD3|LRAD3|-|11p13|protein-coding	cl2	143458
SQLE|-|-|8q24.13|protein-coding	cl2	6713
LBX2-AS1|-|-|2p13.1|ncRNA	cl2	151534
GCAT|KBL|-|22q13.1|protein-coding	cl2	23464
SHB|bA3J10.2|-|9p13.1|protein-coding	cl2	6461
NUS1|C6orf68|CDG1AA|MGC:7199|NgBR|TANGO14|-|6q22.1|protein-coding	cl2	116150
GSR|HEL-75|HEL-S-122m|-|8p12|protein-coding	cl2	2936
PTP4A1|HH72|PRL-1|PRL1|PTP(CAAX1)|PTPCAAX1|-|6q12|protein-coding	cl2	7803
CPEB2|CPE-BP2|CPEB-2|hCPEB-2|-|4p15.32|protein-coding	cl2	132864
RIPK2|CARD3|CARDIAK|CCK|GIG30|RICK|RIP2|-|8q21.3|protein-coding	cl2	8767
NMI|-|-|2q23.3|protein-coding	cl2	9111
SMG1P3|-|-|16p12.2|pseudo	cl2	100271836
SNORA105B|-|-|2q33.1|snoRNA	cl2	106635540
C17orf58|-|-|17q24.2|protein-coding	cl2	284018
EIF5A2|EIF-5A2|eIF5AII|-|3q26.2|protein-coding	cl2	56648
HBEGF|DTR|DTS|DTSF|HEGFL|-|5q31.3|protein-coding	cl2	1839
FAM222B|C17orf63|-|17q11.2|protein-coding	cl2	55731
RPP25|-|-|15q24.2|protein-coding	cl2	54913
SYNGR2|-|-|17q25.3|protein-coding	cl2	9144
RAI14|NORPEG|RAI13|-|5p13.2|protein-coding	cl2	26064
RPS20|S20|-|8q12.1|protein-coding	cl2	6224
NIPA1|FSP3|SPG6|-|15q11.2|protein-coding	cl2	123606
WWTR1|TAZ|-|3q25.1|protein-coding	cl2	25937
FAM86HP|-|-|3q22.1|pseudo	cl2	729375
TACC2|AZU-1|ECTACC|-|10q26.13|protein-coding	cl2	10579
NETO2|BTCL2|NEOT2|-|16q12.1|protein-coding	cl2	81831
CHCHD2|C7orf17|MNRR1|NS2TP|PARK22|-|7p11.2|protein-coding	cl2	51142
ISOC1|CGI-111|-|5q23.3|protein-coding	cl2	51015
TSPAN14|DC-TM4F2|TM4SF14|-|10q23.1|protein-coding	cl2	81619
PHLDA2|BRW1C|BWR1C|HLDA2|IPL|TSSC3|-|11p15.4|protein-coding	cl2	7262
ZNF286A|ZNF286|-|17p12|protein-coding	cl2	57335
PPP1R13B|ASPP1|p53BP2-like|p85|-|14q32.33|protein-coding	cl2	23368
POM121|P145|POM121A|-|7q11.23|protein-coding	cl2	9883
USP18|ISG43|UBP43|-|22q11.21|protein-coding	cl2	11274
RCL1|RNAC|RPCL1|-|9p24.1|protein-coding	cl2	10171
E2F6|E2F-6|-|2p25.1|protein-coding	cl2	1876
C4orf32|-|-|4q25|protein-coding	cl2	132720
IGF2BP3|CT98|IMP-3|IMP3|KOC|KOC1|VICKZ3|-|7p15.3|protein-coding	cl2	10643
ARL5B|ARL8|-|10p12.31|protein-coding	cl2	221079
FBXO41|FBX41|-|2p13.2|protein-coding	cl2	150726
PTPN3|PTP-H1|PTPH1|-|9q31.3|protein-coding	cl2	5774
HSPB8|CMT2L|DHMN2|E2IG1|H11|HMN2|HMN2A|HSP22|-|12q24.23|protein-coding	cl2	26353
FKBP5|AIG6|FKBP51|FKBP54|P54|PPIase|Ptg-10|-|6p21.31|protein-coding	cl2	2289
SPRED1|NFLS|PPP1R147|hSpred1|spred-1|-|15q14|protein-coding	cl2	161742
EPB41L5|BE37|YMO1|YRT|-|2q14.2|protein-coding	cl2	57669
PPP1R14A|CPI-17|CPI17|PPP1INL|-|19q13.2|protein-coding	cl2	94274
ETV4|E1A-F|E1AF|PEA3|PEAS3|-|17q21.31|protein-coding	cl2	2118
MAFF|U-MAF|hMafF|-|22q13.1|protein-coding	cl2	23764
ACTA2|AAT6|ACTSA|MYMY5|-|10q23.31|protein-coding	cl2	59
SPATA2L|C16orf76|tamo|-|16q24.3|protein-coding	cl2	124044
SMAP2|SMAP1L|-|1p34.2|protein-coding	cl2	64744
DUSP6|HH19|MKP3|PYST1|-|12q21.33|protein-coding	cl2	1848
ECHDC3|-|-|10p14|protein-coding	cl2	79746
PGD|6PGD|-|1p36.22|protein-coding	cl2	5226
YRDC|DRIP3|IRIP|SUA5|-|1p34.3|protein-coding	cl2	79693
MAP1S|BPY2IP1|C19orf5|MAP8|VCY2IP-1|VCY2IP1|-|19p13.11|protein-coding	cl2	55201
ZC3H8|Fliz1|ZC3HDC8|-|2q14.1|protein-coding	cl2	84524
CHST7|C6ST-2|GST-5|-|Xp11.3|protein-coding	cl2	56548
ITPRIP|DANGER|KIAA1754|bA127L20|bA127L20.2|-|10q25.1|protein-coding	cl2	85450
SLC18B1|C6orf192|dJ55C23.6|-|6q23.2|protein-coding	cl2	116843
C17orf51|-|-|17p11.2|protein-coding	cl2	339263
EDNRA|ET-A|ETA|ETA-R|ETAR|ETRA|MFDA|hET-AR|-|4q31.22-q31.23|protein-coding	cl2	1909
STX11|FHL4|HLH4|HPLH4|-|6q24.2|protein-coding	cl2	8676
CTPS1|CTPS|IMD24|-|1p34.2|protein-coding	cl2	1503
IGFBP2|IBP2|IGF-BP53|-|2q35|protein-coding	cl2	3485
ITPKB|IP3-3KB|IP3K|IP3K-B|IP3KB|PIG37|-|1q42.12|protein-coding	cl2	3707
RHOF|ARHF|RIF|-|12q24.31|protein-coding	cl2	54509
MFHAS1|LRRC65|MASL1|-|8p23.1|protein-coding	cl2	9258
CD14|-|-|5q31.3|protein-coding	cl2	929
CHST2|C6ST|GST-2|GST2|Gn6ST-1|HEL-S-75|glcNAc6ST-1|-|3q24|protein-coding	cl2	9435
SLC39A14|HMNDYT2|LZT-Hs4|NET34|ZIP14|cig19|-|8p21.3|protein-coding	cl2	23516
ZNF703|NLZ1|ZEPPO1|ZNF503L|ZPO1|-|8p11.23|protein-coding	cl2	80139
ARHGAP26|GRAF|GRAF1|OPHN1L|OPHN1L1|-|5q31.3|protein-coding	cl2	23092
MMP15|MMP-15|MT2-MMP|MT2MMP|MTMMP2|SMCP-2|-|16q21|protein-coding	cl2	4324
ARHGEF28|RGNEF|RIP2|p190RHOGEF|-|5q13.2|protein-coding	cl2	64283
SERP1|RAMP4|-|3q25.1|protein-coding	cl2	27230
ARHGEF3|GEF3|STA3|XPLN|-|3p14.3|protein-coding	cl2	50650
PVR|CD155|HVED|NECL5|Necl-5|PVS|TAGE4|-|19q13.31|protein-coding	cl2	5817
KBTBD8|TA-KRP|TAKRP|-|3p14.1|protein-coding	cl2	84541
GXYLT1|GLT8D3|-|12q12|protein-coding	cl2	283464
PSMC1|P26S4|S4|p56|-|14q32.11|protein-coding	cl2	5700
IFIT2|G10P2|GARG-39|IFI-54|IFI-54K|IFI54|IFIT-2|ISG-54 K|ISG-54K|ISG54|P54|cig42|-|10q23.31|protein-coding	cl2	3433
C1D|LRP1|Rrp47|SUN-CoR|SUNCOR|hC1D|-|2p14|protein-coding	cl2	10438
MPP6|PALS2|VAM-1|VAM1|p55T|-|7p15.3|protein-coding	cl2	51678
LOC728730|-|-|2p22.1|ncRNA	cl2	728730
SIK1|MSK|SIK|SIK-1|SNF1LK|-|21q22.3|protein-coding	cl2	150094
ODC1|ODC|-|2p25.1|protein-coding	cl2	4953
STK26|MASK|MST4|-|Xq26.2|protein-coding	cl2	51765
LONRF1|RNF191|-|8p23.1|protein-coding	cl2	91694
DNAJB9|ERdj4|MDG-1|MDG1|MST049|MSTP049|-|7q31.1|14q24.2-q24.3|protein-coding	cl2	4189
LGALSL|GRP|HSPC159|-|2p14|protein-coding	cl2	29094
SQRDL|CGI-44|PRO1975|SQOR|-|15q21.1|protein-coding	cl2	58472
LOC102724428|-|-|21p12|protein-coding	cl2	102724428
ASPHD1|-|-|16p11.2|protein-coding	cl2	253982
YDJC|-|-|22q11.21|protein-coding	cl2	150223
RGS2|G0S8|-|1q31.2|protein-coding	cl2	5997
ADRA2C|ADRA2L2|ADRA2RL2|ADRARL2|ALPHA2CAR|-|4p16.3|protein-coding	cl3	152
THAP8|-|-|19q13.12|protein-coding	cl3	199745
LOC101928841|-|-|13q34|protein-coding	cl3	101928841
CPT1B|CPT1-M|CPT1M|CPTI|CPTI-M|M-CPT1|MCCPT1|MCPT1|-|22q13.33|protein-coding	cl3	1375
CECR7|SAHL1|-|22q11.1|ncRNA	cl3	100130418
MKX|C10orf48|IFRX|IRXL1|-|10p12.1|protein-coding	cl3	283078
ID3|HEIR-1|bHLHb25|-|1p36.12|protein-coding	cl3	3399
MAB21L1|CAGR1|Nbla00126|-|13q13.3|protein-coding	cl3	4081
STK32A|YANK1|-|5q32|protein-coding	cl3	202374
CIB2|DFNB48|KIP2|USH1J|-|15q25.1|protein-coding	cl3	10518
AMPH|AMPH1|-|7p14.1|protein-coding	cl3	273
TRNP1|C1orf225|TNRP|-|1p36.11|protein-coding	cl3	388610
MOSPD2|-|-|Xp22.2|protein-coding	cl3	158747
HIP1|HIP-I|ILWEQ|SHON|SHONbeta|SHONgamma|-|7q11.23|protein-coding	cl3	3092
HSPA2|HSP70-2|HSP70-3|-|14q23.3|protein-coding	cl3	3306
PATJ|Cipp|INADL|InaD-like|hINADL|-|1p31.3|protein-coding	cl3	10207
SLC5A3|BCW2|SMIT|SMIT1|SMIT2|-|21q22.11|protein-coding	cl3	6526
TBX3|TBX3-ISO|UMS|XHL|-|12q24.21|protein-coding	cl3	6926
LRRFIP2|HUFI-2|-|3p22.2|protein-coding	cl3	9209
EPHA4|HEK8|SEK|TYRO1|-|2q36.1|protein-coding	cl3	2043
ZNF536|-|-|19q12|protein-coding	cl3	9745
NXN|NRX|TRG-4|-|17p13.3|protein-coding	cl3	64359
RP9P|-|-|7p14.3|pseudo	cl3	441212
ACTC1|ACTC|ASD5|CMD1R|CMH11|LVNC4|-|15q14|protein-coding	cl3	70
FOXD1|FKHL8|FREAC-4|FREAC4|-|5q13.2|protein-coding	cl3	2297
ZNF177|PIGX|-|19p13.2|protein-coding	cl3	7730
GSN|ADF|AGEL|-|9q33.2|protein-coding	cl3	2934
COL11A1|CO11A1|COLL6|STL2|-|1p21.1|protein-coding	cl3	1301
EML6|-|-|2p16.1|protein-coding	cl3	400954
FBXO44|FBG3|FBX30|FBX6A|Fbx44|Fbxo6a|-|1p36.22|protein-coding	cl3	93611
TIAM2|STEF|TIAM-2|-|6q25.2-q25.3|protein-coding	cl3	26230
PTPRN|IA-2|IA-2/PTP|IA2|ICA512|R-PTP-N|-|2q35|protein-coding	cl3	5798
ANXA2P3|ANX2L3|ANX2P3|LIP2|LPC2C|-|10q21.3|pseudo	cl3	305
CIART|C1orf51|CHRONO|GM129|-|1q21.2|protein-coding	cl3	148523
KCNIP3|CSEN|DREAM|KCHIP3|-|2q11.1|protein-coding	cl3	30818
ZNF781|-|-|19q13.12|protein-coding	cl3	163115
CORO6|-|-|17q11.2|protein-coding	cl3	84940
REC8|HR21spB|REC8L1|Rec8p|-|14q12|protein-coding	cl3	9985
FBLN1|FBLN|FIBL1|-|22q13.31|protein-coding	cl3	2192
OSR2|-|-|8q22.2|protein-coding	cl3	116039
PSD4|EFA6B|TIC|-|2q14.1|protein-coding	cl3	23550
UCN2|SRP|UCN-II|UCNI|UR|URP|-|3p21.31|protein-coding	cl3	90226
PRR5|FLJ20185k|PP610|PROTOR-1|PROTOR1|-|22q13.31|protein-coding	cl3	55615
OPRL1|KOR-3|NOCIR|NOP|NOPr|OOR|ORL1|-|20q13.33|protein-coding	cl3	4987
PTP4A3|PRL-3|PRL-R|PRL3|-|8q24.3|protein-coding	cl3	11156
TBX5-AS1|-|-|12q24.21|ncRNA	cl3	255480
COL27A1|STLS|-|9q32|protein-coding	cl3	85301
AUTS2|FBRSL2|MRD26|-|7q11.22|protein-coding	cl3	26053
MSX1|ECTD3|HOX7|HYD1|STHAG1|-|4p16.2|protein-coding	cl3	4487
UCP2|BMIQ4|SLC25A8|UCPH|-|11q13.4|protein-coding	cl3	7351
ATP23|KUB3|XRCC6BP1|-|12q14.1|protein-coding	cl3	91419
CAV1|BSCL3|CGL3|LCCNS|MSTP085|PPH3|VIP21|-|7q31.2|protein-coding	cl3	857
SKAP2|PRAP|RA70|SAPS|SCAP2|SKAP-HOM|SKAP55R|-|7p15.2|protein-coding	cl3	8935
RAET1G|ULBP5|-|6q25.1|protein-coding	cl3	353091
RFLNB|CFM1|FAM101B|-|17p13.3|protein-coding	cl3	359845
HTRA2|MGCA8|OMI|PARK13|PRSS25|-|2p13.1|protein-coding	cl3	27429
CYP27A1|CP27|CTX|CYP27|-|2q35|protein-coding	cl3	1593
PITX2|ARP1|Brx1|IDG2|IGDS|IGDS2|IHG2|IRID2|Otlx2|PTX2|RGS|RIEG|RIEG1|RS|-|4q25|protein-coding	cl3	5308
CREBRF|C5orf41|LRF|-|5q35.1|protein-coding	cl3	153222
PPP1R12A|M130|MBS|MYPT1|-|12q21.2-q21.31|protein-coding	cl3	4659
CCDC77|-|-|12p13.33|protein-coding	cl3	84318
ZNF154|pHZ-92|-|19q13.43|protein-coding	cl3	7710
HAGLR|HOXD-AS1|Mdgt|-|2q31.1|ncRNA	cl3	401022
STON1|SALF|SBLF|STN1|STNB1|-|2p16.3|protein-coding	cl3	11037
MAP10|KIAA1383|MTR120|-|1q42.2|protein-coding	cl3	54627
CITED2|ASD8|MRG-1|MRG1|P35SRJ|VSD2|-|6q24.1|protein-coding	cl3	10370
HUNK|-|-|21q22.11|protein-coding	cl3	30811
NIPSNAP3B|FP944|NIPSNAP3|SNAP1|-|9q31.1|protein-coding	cl3	55335
HS3ST3B1|3-OST-3B|3OST3B1|h3-OST-3B|-|17p12|protein-coding	cl3	9953
CCDC14|-|-|3q21.1|protein-coding	cl3	64770
ADCY10P1|-|-|6p21.1|pseudo	cl3	221442
HOXD9|HOX4|HOX4C|Hox-4.3|Hox-5.2|-|2q31.1|protein-coding	cl3	3235
ST6GALNAC5|SIAT7-E|SIAT7E|ST6GalNAcV|-|1p31.1|protein-coding	cl3	81849
TBX5|HOS|-|12q24.21|protein-coding	cl3	6910
CCDC84|DLNB14|-|11q23.3|protein-coding	cl3	338657
XYLT1|DBQD2|PXYLT1|XT-I|XT1|XTI|XYLTI|xylT-I|-|16p12.3|protein-coding	cl3	64131
FHOD3|FHOS2|Formactin2|-|18q12.2|protein-coding	cl3	80206
LOC100049716|-|-|12p13.33|ncRNA	cl3	100049716
ZNF883|-|-|9q32|protein-coding	cl3	169834
FGFR2|BBDS|BEK|BFR-1|CD332|CEK3|CFD1|ECT1|JWS|K-SAM|KGFR|TK14|TK25|-|10q26.13|protein-coding	cl3	2263
MT1M|MT-1M|MT-IM|MT1|MT1K|-|16q13|protein-coding	cl3	4499
FAM69A|-|-|1p22.1|protein-coding	cl3	388650
TNC|150-225|DFNA56|GMEM|GP|HXB|JI|TN|TN-C|-|9q33.1|protein-coding	cl3	3371
KIAA1549|-|-|7q34|protein-coding	cl3	57670
BEND7|C10orf30|-|10p13|protein-coding	cl3	222389
LINC00886|-|-|3q25.31|ncRNA	cl3	730091
ADSSL1|MPD5|-|14q32.33|protein-coding	cl3	122622
MCAM|CD146|MUC18|-|11q23.3|protein-coding	cl3	4162
NEO1|IGDCC2|NGN|NTN1R2|-|15q24.1|protein-coding	cl3	4756
COL11A2|DFNA13|DFNB53|FBCG2|HKE5|PARP|STL3|-|6p21.32|protein-coding	cl3	1302
SCML2|-|-|Xp22.13|protein-coding	cl3	10389
MALT1|IMD12|MLT|MLT1|PCASP1|-|18q21.32|protein-coding	cl3	10892
GIPR|PGQTL2|-|19q13.32|protein-coding	cl3	2696
LOC400043|-|-|12q13.13|ncRNA	cl3	400043
HLA-L|HLA-92|HLA92|HLAL|-|6p22.1|pseudo	cl3	3139
CCDC103|CILD17|PR46b|SMH|-|17q21.31|protein-coding	cl3	388389
DTX3|RNF154|deltex3|-|12q13.3|protein-coding	cl3	196403
TMEM169|-|-|2q35|protein-coding	cl3	92691
LDLRAD4|C18orf1|-|18p11.21|protein-coding	cl3	753
RCAN3|DSCR1L2|MCIP3|RCN3|hRCN3|-|1p36.11|protein-coding	cl3	11123
CMKLR1|CHEMERINR|ChemR23|DEZ|RVER1|-|12q23.3|protein-coding	cl3	1240
RUNX3|AML2|CBFA3|PEBP2aC|-|1p36.11|protein-coding	cl3	864
ARHGEF25|GEFT|p63RhoGEF|-|12q13.3|protein-coding	cl3	115557
SIX1|BOS3|DFNA23|TIP39|-|14q23.1|protein-coding	cl3	6495
SLC9A5|NHE5|-|16q22.1|protein-coding	cl3	6553
GPRASP1|GASP|GASP-1|GASP1|-|Xq22.1|protein-coding	cl3	9737
LURAP1|C1orf190|LRAP35a|LRP35A|-|1p34.1|protein-coding	cl3	541468
C10orf25|-|-|10q11.21|protein-coding	cl3	220979
NIPAL2|NPAL2|-|8q22.2|protein-coding	cl3	79815
RAB15|-|-|14q23.3|protein-coding	cl3	376267
CRISPLD2|CRISP11|LCRISP2|LGL1|-|16q24.1|protein-coding	cl3	83716
C15orf59|INSYN1|-|15q24.1|protein-coding	cl3	388135
LOC100128398|-|-|19q13.43|ncRNA	cl3	100128398
JPH2|CMH17|JP-2|JP2|-|20q13.12|protein-coding	cl3	57158
ADM|AM|PAMP|-|11p15.4|protein-coding	cl3	133
GCNA|ACRC|NAAR1|-|Xq13.1|protein-coding	cl3	93953
HOXB7|HHO.C1|HOX2|HOX2C|Hox-2.3|-|17q21.32|protein-coding	cl3	3217
AVIL|ADVIL|DOC6|p92|-|12q14.1|protein-coding	cl3	10677
ATL1|AD-FSP|FSP1|GBP3|HSN1D|SPG3|SPG3A|atlastin1|-|14q22.1|protein-coding	cl3	51062
TSC22D3|DIP|DSIPI|GILZ|TSC-22R|-|Xq22.3|protein-coding	cl3	1831
C9orf3|AOPEP|AP-O|APO|C90RF3|ONPEP|-|9q22.32|protein-coding	cl3	84909
FAT4|CDHF14|CDHR11|FAT-J|FATJ|HKLLS2|NBLA00548|VMLDS2|-|4q28.1|protein-coding	cl3	79633
HSPA12A|-|-|10q25.3|protein-coding	cl3	259217
HOXB6|HOX2|HOX2B|HU-2|Hox-2.2|-|17q21.32|protein-coding	cl3	3216
EID3|NS4EB|NSE4B|NSMCE4B|-|12q23.3|protein-coding	cl3	493861
LINC00960|-|-|3p12.3|ncRNA	cl3	401074
AMZ1|-|-|7p22.3|protein-coding	cl3	155185
ZNF667|MIPU1|-|19q13.43|protein-coding	cl3	63934
KIAA1958|-|-|9q32|protein-coding	cl3	158405
CAPN3|CANP3|CANPL3|LGMD2|LGMD2A|nCL-1|p94|-|15q15.1|protein-coding	cl3	825
SAMD4A|SAMD4|SMAUG|SMAUG1|SMG|SMGA|-|14q22.2|protein-coding	cl3	23034
CDK15|ALS2CR7|PFTAIRE2|PFTK2|-|2q33.1|protein-coding	cl3	65061
ZMYND10|BLU|CILD22|FLU|-|3p21.31|protein-coding	cl3	51364
GDPD5|GDE2|PP1665|-|11q13.4-q13.5|protein-coding	cl3	81544
SPSB2|GRCC9|SSB2|-|12p13.31|protein-coding	cl3	84727
NUDT17|-|-|1q21.1|protein-coding	cl3	200035
TANC2|ROLSA|rols|-|17q23.2-q23.3|protein-coding	cl3	26115
ID2|GIG8|ID2A|ID2H|bHLHb26|-|2p25.1|protein-coding	cl3	3398
FARP1|CDEP|FARP1-IT1|PLEKHC2|PPP1R75|-|13q32.2|protein-coding	cl3	10160
U2AF1L4|U2AF1-RS3|U2AF1L3|U2AF1L3V1|U2AF1RS3|U2af26|-|19q13.12|protein-coding	cl3	199746
WHRN|CIP98|DFNB31|PDZD7B|USH2D|WI|-|9q32|protein-coding	cl3	25861
CLDN7|CEPTRL2|CLDN-7|CPETRL2|Hs.84359|claudin-1|-|17p13.1|protein-coding	cl3	1366
RNF150|-|-|4q31.21|protein-coding	cl3	57484
CMYA5|C5orf10|SPRYD2|TRIM76|-|5q14.1|protein-coding	cl3	202333
HSPB3|DHMN2C|HMN2C|HSPL27|-|5q11.2|protein-coding	cl3	8988
SLC26A10|-|-|12q13.3|protein-coding	cl3	65012
TRAM1L1|-|-|4q26|protein-coding	cl3	133022
KANK1|ANKRD15|CPSQ2|KANK|-|9p24.3|protein-coding	cl3	23189
MYLK|AAT7|KRP|MLCK|MLCK1|MLCK108|MLCK210|MSTP083|MYLK1|smMLCK|-|3q21.1|protein-coding	cl3	4638
SULF2|HSULF-2|-|20q13.12|protein-coding	cl3	55959
B3GALT4|BETA3GALT4|GALT2|GALT4|-|6p21.32|protein-coding	cl3	8705
RHOU|ARHU|CDC42L1|G28K|WRCH1|hG28K|-|1q42.13|protein-coding	cl3	58480
ZNF404|-|-|19q13.31|protein-coding	cl3	342908
MEG3|FP504|GTL2|LINC00023|NCRNA00023|PRO0518|PRO2160|onco-lncRNA-83|prebp1|-|14q32.2|ncRNA	cl3	55384
HACD1|CAP|PTPLA|-|10p12.33|protein-coding	cl3	9200
FZD1|-|-|7q21.13|protein-coding	cl3	8321
MAFB|DURS3|KRML|MCTO|-|20q12|protein-coding	cl3	9935
FLOT1|-|-|6p21.33|protein-coding	cl3	10211
HOXC5|CP11|HOX3|HOX3D|-|12q13.13|protein-coding	cl3	3222
NOG|SYM1|SYNS1|SYNS1A|-|17q22|protein-coding	cl3	9241
HOMER2|ACPD|CPD|DFNA68|HOMER-2|VESL-2|-|15q25.2|protein-coding	cl3	9455
KIAA1107|-|-|1p22.1|protein-coding	cl3	23285
HSPB7|cvHSP|-|1p36.13|protein-coding	cl3	27129
NKX3-1|BAPX2|NKX3|NKX3.1|NKX3A|-|8p21.2|protein-coding	cl3	4824
NXPH3|NPH3|-|17q21.33|protein-coding	cl3	11248
CLU|AAG4|APO-J|APOJ|CLI|CLU1|CLU2|KUB1|NA1/NA2|SGP-2|SGP2|SP-40|TRPM-2|TRPM2|-|8p21.1|protein-coding	cl3	1191
SYTL2|CHR11SYT|EXO4|PPP1R151|SGA72M|SLP2|SLP2A|-|11q14.1|protein-coding	cl3	54843
DCHS1|CDH19|CDH25|CDHR6|FIB1|MVP2|PCDH16|VMLDS1|-|11p15.4|protein-coding	cl3	8642
HOXC9|HOX3|HOX3B|-|12q13.13|protein-coding	cl3	3225
HOXC8|HOX3|HOX3A|-|12q13.13|protein-coding	cl3	3224
ARNTL|BMAL1|BMAL1c|JAP3|MOP3|PASD3|TIC|bHLHe5|-|11p15.3|protein-coding	cl3	406
LOC100288637|-|-|15q13.2|pseudo	cl3	100288637
C11orf63|-|-|11q24.1|protein-coding	cl3	79864
FBXO6|FBG2|FBS2|FBX6|Fbx6b|-|1p36.22|protein-coding	cl3	26270
CAPG|AFCP|HEL-S-66|MCP|-|2p11.2|protein-coding	cl3	822
MSS51|ZMYND17|-|10q22.2|protein-coding	cl3	118490
BHLHB9|GASP3|p60TRP|-|Xq22.1|protein-coding	cl3	80823
SALL1|HEL-S-89|HSAL1|Sal-1|TBS|ZNF794|-|16q12.1|protein-coding	cl3	6299
SSPN|DAGA5|KRAG|NSPN|SPN1|SPN2|-|12p12.1|protein-coding	cl3	8082
ZFP37|ZNF906|zfp-37|-|9q32|protein-coding	cl3	7539
SYCP2|SCP-2|SCP2|-|20q13.33|protein-coding	cl3	10388
FAM71F2|FAM137B|-|7q32.1|protein-coding	cl3	346653
DLX2|TES-1|TES1|-|2q31.1|protein-coding	cl3	1746
LINC00673|HI-LNC75|HILNC75|LUCAIR1|SLNCR|SLNCR1|-|17q24.3|ncRNA	cl3	100499467
HOXD3|HOX1D|HOX4|HOX4A|Hox-4.1|-|2q31.1|protein-coding	cl3	3232
LINC00665|-|-|19q13.12|ncRNA	cl3	100506930
CSMD2|dJ1007G16.1|dJ1007G16.2|dJ947L8.1|-|1p35.1|protein-coding	cl3	114784
IRX2|IRXA2|-|5p15.33|protein-coding	cl3	153572
TSPY26P|TSPYL3|bA392M18.1|-|20q11.21|pseudo	cl3	128854
IL20RB|DIRS1|FNDC6|IL-20R2|-|3q22.3|protein-coding	cl3	53833
HIST1H1C|H1.2|H1C|H1F2|H1s-1|-|6p22.2|protein-coding	cl3	3006
ZBED5-AS1|-|-|11p15.4|ncRNA	cl3	729013
ZNF135|ZNF61|ZNF78L1|pHZ-17|pT3|-|19q13.43|protein-coding	cl3	7694
GATA2|DCML|IMD21|MONOMAC|NFE1B|-|3q21.3|protein-coding	cl3	2624
HOXC6|CP25|HHO.C8|HOX3|HOX3C|-|12q13.13|protein-coding	cl3	3223
CTC-338M12.4|-|-|5q35.3|ncRNA	cl3	101928649
PPP2R3A|PPP2R3|PR130|PR72|-|3q22.2-q22.3|protein-coding	cl3	5523
PRDM1|BLIMP1|PRDI-BF1|-|6q21|protein-coding	cl3	639
LNX1|LNX|MPDZ|PDZRN2|-|4q12|protein-coding	cl3	84708
PGF|D12S1900|PGFL|PIGF|PLGF|PlGF-2|SHGC-10760|-|14q24.3|protein-coding	cl3	5228
ANKRD12|ANCO-2|ANCO1|GAC-1|Nbla00144|-|18p11.22|protein-coding	cl3	23253
ARHGEF4|ASEF|ASEF1|GEF4|STM6|-|2q21.1|protein-coding	cl3	50649
TUB|RDOB|rd5|-|11p15.4|protein-coding	cl3	7275
PEX11A|PEX11-ALPHA|PMP28|hsPEX11p|-|15q26.1|protein-coding	cl3	8800
IRS2|IRS-2|-|13q34|protein-coding	cl3	8660
RGN|GNL|HEL-S-41|RC|SMP30|-|Xp11.3|protein-coding	cl3	9104
HOXD8|HOX4|HOX4E|HOX5.4|-|2q31.1|protein-coding	cl3	3234
SMAD9|MADH6|MADH9|PPH2|SMAD8|SMAD8/9|SMAD8A|SMAD8B|-|13q13.3|protein-coding	cl3	4093
C3orf18|G20|-|3p21.31|protein-coding	cl3	51161
SNORA103|-|-|1q25.1|snoRNA	cl3	106635533
GPC4|K-glypican|-|Xq26.2|protein-coding	cl3	2239
PRPH2|AOFMD|AVMD|CACD2|DS|MDBS1|PRPH|RDS|RP7|TSPAN22|rd2|-|6p21.1|protein-coding	cl3	5961
SGCG|35DAG|A4|DAGA4|DMDA|DMDA1|LGMD2C|MAM|SCARMD2|SCG3|gamma-SG|-|13q12.12|protein-coding	cl3	6445
KREMEN1|KREMEN|KRM1|-|22q12.1|protein-coding	cl3	83999
STARD8|ARHGAP38|DLC3|STARTGAP3|-|Xq13.1|protein-coding	cl3	9754
ZNF69|Cos5|hZNF3|-|19p13.2|protein-coding	cl3	7620
CELSR3|ADGRC3|CDHF11|EGFL1|FMI1|HFMI1|MEGF2|RESDA1|-|3p21.31|protein-coding	cl3	1951
FMN1|FMN|LD|-|15q13.3|protein-coding	cl3	342184
TSPYL5|-|-|8q22.1|protein-coding	cl3	85453
TBX15|TBX14|-|1p12|protein-coding	cl3	6913
TLE4|BCE-1|BCE1|E(spI)|ESG|ESG4|GRG4|Grg-4|-|9q21.31|protein-coding	cl3	7091
FZD7|FzE3|-|2q33.1|protein-coding	cl3	8324
NRN1|NRN|dJ380B8.2|-|6p25.1|protein-coding	cl3	51299
GSTM5|GSTM5-5|GTM5|-|1p13.3|protein-coding	cl3	2949
DIXDC1|CCD1|-|11q23.1|protein-coding	cl3	85458
RBM47|NET18|-|4p14|protein-coding	cl3	54502
ZNF415|ZfLp|-|19q13.42|protein-coding	cl3	55786
SHOX2|OG12|OG12X|SHOT|-|3q25.32|protein-coding	cl3	6474
FAM78A|C9orf59|-|9q34.13|protein-coding	cl3	286336
CAND2|TIP120B|Tp120b|-|3p25.2|protein-coding	cl3	23066
HOXD4|HHO.C13|HOX-5.1|HOX4|HOX4B|Hox-4.2|-|2q31.1|protein-coding	cl3	3233
UBL3|HCG-1|PNSC1|-|13q12.3|protein-coding	cl3	5412
HMOX1|HMOX1D|HO-1|HSP32|bK286B10|-|22q12.3|protein-coding	cl3	3162
CYS1|-|-|2p25.1|protein-coding	cl3	192668
PIWIL4|HIWI2|MIWI2|-|11q21|protein-coding	cl3	143689
ELL2|-|-|5q15|protein-coding	cl3	22936
HCN3|-|-|1q22|protein-coding	cl3	57657
NEAT1|LINC00084|NCRNA00084|TncRNA|VINC|-|11q13.1|ncRNA	cl3	283131
SLC7A8|LAT2|LPI-PC1|-|14q11.2|protein-coding	cl3	23428
STPG1|C1orf201|MAPO2|-|1p36.11|protein-coding	cl3	90529
CSRP2|CRP2|LMO5|SmLIM|-|12q21.2|protein-coding	cl3	1466
SHROOM3|APXL3|MSTP013|SHRM|ShrmL|-|4q21.1|protein-coding	cl3	57619
DMPK|DM|DM1|DM1PK|DMK|MDPK|MT-PK|-|19q13.32|protein-coding	cl3	1760
LCAT|-|-|16q22.1|protein-coding	cl3	3931
ZNF793|-|-|19q13.12|protein-coding	cl3	390927
ELL3|-|-|15q15.3|protein-coding	cl3	80237
AGER|RAGE|SCARJ1|-|6p21.32|protein-coding	cl3	177
ADPRHL1|ARH2|-|13q34|protein-coding	cl3	113622
MMP24|MMP-24|MMP25|MT-MMP 5|MT-MMP5|MT5-MMP|MT5MMP|MTMMP5|-|20q11.22|protein-coding	cl3	10893
TSPAN2|NET3|TSN2|TSPAN-2|-|1p13.2|protein-coding	cl3	10100
TRIM7|GNIP|RNF90|-|5q35.3|protein-coding	cl3	81786
SDCBP2-AS1|-|-|20p13|ncRNA	cl3	100507495
EN1|-|-|2q14.2|protein-coding	cl3	2019
MPP2|DLG2|-|17q21.31|protein-coding	cl3	4355
PRELP|MST161|MSTP161|SLRR2A|-|1q32.1|protein-coding	cl3	5549
HENMT1|C1orf59|HEN1|-|1p13.3|protein-coding	cl3	113802
RASSF2|CENP-34|RASFADIN|-|20p13|protein-coding	cl3	9770
CDC14B|CDC14B3|Cdc14B1|Cdc14B2|hCDC14B|-|9q22.32-q22.33|protein-coding	cl3	8555
CBX7|-|-|22q13.1|protein-coding	cl3	23492
SCNN1D|ENaCd|ENaCdelta|SCNED|dNaCh|-|1p36.33|protein-coding	cl3	6339
ADAM33|C20orf153|DJ964F7.1|-|20p13|protein-coding	cl3	80332
PINK1|BRPK|PARK6|-|1p36.12|protein-coding	cl3	65018
DEPDC7|TR2|dJ85M6.4|-|11p13|protein-coding	cl3	91614
B3GNT8|B3GALT7|BGALT15|beta3Gn-T8|-|19q13.2|protein-coding	cl3	374907
FOXL2|BPES|BPES1|PFRK|PINTO|POF3|-|3q22.3|protein-coding	cl3	668
POPDC3|POP3|bA355M14.1|-|6q21|protein-coding	cl3	64208
NPR2|AMDM|ANPRB|ANPb|ECDM|GUC2B|GUCY2B|NPRB|NPRBi|SNSK|-|9p13.3|protein-coding	cl3	4882
MGC12916|-|-|17p12|ncRNA	cl3	84815
TMEM8B|C9orf127|NAG-5|NAG5|NGX6|-|9p13.3|protein-coding	cl3	51754
ZNF491|-|-|19p13.2|protein-coding	cl3	126069
MIR4647|mir-4647|-|6p21.1|ncRNA	cl3	100616124
MAP3K14|FTDCR1B|HS|HSNIK|NIK|-|17q21.31|protein-coding	cl3	9020
TIAF1|MAJN|SPR210|-|17q11.2|protein-coding	cl3	9220
LPIN3|LIPN3L|SMP2|-|20q12|protein-coding	cl3	64900
COL9A2|DJ39G22.4|EDM2|MED|STL5|-|1p34.2|protein-coding	cl3	1298
IRX5|HMMS|IRX-2a|IRXB2|-|16q12.2|protein-coding	cl3	10265
WNT3|INT4|TETAMS|-|17q21.31-q21.32|protein-coding	cl3	7473
OSER1-AS1|-|-|20q13.12|ncRNA	cl3	100505783
GADD45B|GADD45BETA|MYD118|-|19p13.3|protein-coding	cl3	4616
SETBP1|MRD29|SEB|-|18q12.3|protein-coding	cl3	26040
C5orf38|CEI|IRX2NB|-|5p15.33|protein-coding	cl3	153571
ALS2CL|RN49018|-|3p21.31|protein-coding	cl3	259173
EPHB3|EK2|ETK2|HEK2|TYRO6|-|3q27.1|protein-coding	cl3	2049
BHMT2|-|-|5q14.1|protein-coding	cl3	23743
MTSS1L|ABBA|ABBA-1|ABBA1|-|16q22.1|protein-coding	cl3	92154
CTSF|CATSF|CLN13|-|11q13.2|protein-coding	cl3	8722
PTGER3|EP3|EP3-I|EP3-II|EP3-III|EP3-IV|EP3-VI|EP3e|PGE2-R|-|1p31.1|protein-coding	cl3	5733
MIR6501|hsa-mir-6501|mir-6501|-|21q22.11|ncRNA	cl3	102465248
KALRN|ARHGEF24|CHD5|CHDS5|DUET|DUO|HAPIP|TRAD|-|3q21.1-q21.2|protein-coding	cl3	8997
EHBP1|HPC12|NACSIN|-|2p15|protein-coding	cl3	23301
STON1-GTF2A1L|SALF|-|2p16.3|protein-coding	cl3	286749
ZNF439|-|-|19p13.2|protein-coding	cl3	90594
CDK3|-|-|17q25.1|protein-coding	cl3	1018
RASD2|MGC:4834|Rhes|TEM2|-|22q12.3|protein-coding	cl3	23551
FAM13B|ARHGAP49|C5orf5|FAM13B1|KHCHP|N61|-|5q31.2|protein-coding	cl3	51306
ZNF93|HPF34|HTF34|TF34|ZNF505|-|19p12|protein-coding	cl3	81931
NOL3|ARC|FCM|MYP|NOP|NOP30|-|16q22.1|protein-coding	cl3	8996
GAS7|MLL/GAS7|-|17p13.1|protein-coding	cl3	8522
TYRO3|BYK|Dtk|Etk-2|RSE|Rek|Sky|Tif|-|15q15.1|protein-coding	cl3	7301
RAET1E|LETAL|N2DL-4|NKG2DL4|RAET1E2|RL-4|ULBP4|bA350J20.7|-|6q25.1|protein-coding	cl3	135250
ZNF90|HTF9|-|19p12|protein-coding	cl3	7643
CDKN2D|INK4D|p19|p19-INK4D|-|19p13.2|protein-coding	cl4	1032
MASP1|3MC1|CRARF|CRARF1|MAP1|MASP|MASP3|MAp44|PRSS5|RaRF|-|3q27.3|protein-coding	cl4	5648
MIR497HG|MIR195HG|-|17p13.1|ncRNA	cl4	100506755
KIF23|CHO1|KNSL5|MKLP-1|MKLP1|-|15q23|protein-coding	cl4	9493
TENM4|Doc4|ETM5|ODZ4|TNM4|Ten-M4|ten-4|-|11q14.1|protein-coding	cl4	26011
PCNT|KEN|MOPD2|PCN|PCNT2|PCNTB|PCTN2|SCKL4|-|21q22.3|protein-coding	cl4	5116
NCAPD2|CAP-D2|CNAP1|hCAP-D2|-|12p13.31|protein-coding	cl4	9918
CCNB2|HsT17299|-|15q22.2|protein-coding	cl4	9133
ADAMTS5|ADAM-TS 11|ADAM-TS 5|ADAM-TS5|ADAMTS-11|ADAMTS-5|ADAMTS11|ADMP-2|-|21q21.3|protein-coding	cl4	11096
CD24|CD24A|-|6q21|protein-coding	cl4	100133941
KANK4|ANKRD38|dJ1078M7.1|-|1p31.3|protein-coding	cl4	163782
ZNF395|HDBP-2|HDBP2|HDRF-2|PBF|PRF-1|PRF1|Si-1-8-14|-|8p21.1|protein-coding	cl4	55893
SLC4A8|NBC3|NDCBE|-|12q13.13|protein-coding	cl4	9498
LTK|TYK1|-|15q15.1|protein-coding	cl4	4058
LRRN4CL|-|-|11q12.3|protein-coding	cl4	221091
KLHL17|-|-|1p36.33|protein-coding	cl4	339451
CNTN3|BIG-1|PANG|PCS|-|3p12.3|protein-coding	cl4	5067
KIF2C|CT139|KNSL6|MCAK|-|1p34.1|protein-coding	cl4	11004
APBB1IP|INAG1|PREL1|RARP1|RIAM|-|10p12.1|protein-coding	cl4	54518
MOXD1|MOX|PRO5780|dJ248E1.1|-|6q23.2|protein-coding	cl4	26002
ATG16L2|ATG16B|WDR80|-|11q13.4|protein-coding	cl4	89849
KCNE4|MIRP3|-|2q36.1|protein-coding	cl4	23704
CALHM2|FAM26B|-|10q24.33|protein-coding	cl4	51063
CENPM|C22orf18|CENP-M|PANE1|-|22q13.2|protein-coding	cl4	79019
GAL|ETL8|GAL-GMAP|GALN|GLNN|GMAP|-|11q13.2|protein-coding	cl4	51083
GLI3|ACLS|GCPS|GLI3-190|GLI3FL|PAP-A|PAPA|PAPA1|PAPB|PHS|PPDIV|-|7p14.1|protein-coding	cl4	2737
LINC01116|-|-|2q31.1|ncRNA	cl4	375295
CA5B|CA-VB|-|Xp22.2|protein-coding	cl4	11238
PRC1|ASE1|-|15q26.1|protein-coding	cl4	9055
FOXM1|FKHL16|FOXM1B|HFH-11|HFH11|HNF-3|INS-1|MPHOSPH2|MPP-2|MPP2|PIG29|TRIDENT|-|12p13.33|protein-coding	cl4	2305
TRO|MAGE-d3|MAGED3|-|Xp11.21|protein-coding	cl4	7216
SULF1|SULF-1|-|8q13.2-q13.3|protein-coding	cl4	23213
C11orf87|LOH11CR1A|NEURIM1|-|11q22.3|protein-coding	cl4	399947
CENPE|CENP-E|KIF10|MCPH13|PPP1R61|-|4q24|protein-coding	cl4	1062
PRTFDC1|HHGP|-|10p12.1|protein-coding	cl4	56952
SLIT3|MEGF5|SLIL2|SLIT1|Slit-3|slit2|-|5q34-q35.1|protein-coding	cl4	6586
PLPP3|Dri42|LPP3|PAP2B|PPAP2B|VCIP|-|1p32.2|protein-coding	cl4	8613
KLF6|BCD1|CBA1|COPEB|CPBP|GBF|PAC1|ST12|ZF9|-|10p15.2|protein-coding	cl4	1316
TMEM119|OBIF|-|12q23.3|protein-coding	cl4	338773
ITGA6|CD49f|ITGA6B|VLA-6|-|2q31.1|protein-coding	cl4	3655
MIR5047|-|-|17q23.3|ncRNA	cl4	100616408
BMF|-|-|15q15.1|protein-coding	cl4	90427
CDON|CDO|CDON1|HPE11|ORCAM|-|11q24.2|protein-coding	cl4	50937
CCDC180|C9orf174|KIAA1529|-|9q22.33|protein-coding	cl4	100499483
LYNX1|SLURP2|-|8q24.3|protein-coding	cl4	66004
HYLS1|HLS|-|11q24.2|protein-coding	cl4	219844
SPEG|APEG-1|APEG1|BPEG|CNM5|SPEGalpha|SPEGbeta|-|2q35|protein-coding	cl4	10290
CDCA8|BOR|BOREALIN|DasraB|MESRGP|-|1p34.3|protein-coding	cl4	55143
DIP2C|KIAA0934|-|10p15.3|protein-coding	cl4	22982
ABTB1|BPOZ|BTB3|BTBD21|EF1ABP|PP2259|-|3q21.3|protein-coding	cl4	80325
CENPA|CENP-A|CenH3|-|2p23.3|protein-coding	cl4	1058
ESPL1|ESP1|SEPA|-|12q13.13|protein-coding	cl4	9700
PCDHB13|PCDH-BETA13|-|5q31.3|protein-coding	cl4	56123
BUB1B|BUB1beta|BUBR1|Bub1A|MAD3L|MVA1|SSK1|hBUBR1|-|15q15.1|protein-coding	cl4	701
VIT|-|-|2p22.2|protein-coding	cl4	5212
EZR|CVIL|CVL|HEL-S-105|VIL2|-|6q25.3|protein-coding	cl4	7430
ARHGAP33|NOMA-GAP|SNX26|TCGAP|-|19q13.12|protein-coding	cl4	115703
KCNMA1|BKTM|KCa1.1|MaxiK|SAKCA|SLO|SLO-ALPHA|SLO1|bA205K10.1|hSlo|mSLO1|-|10q22.3|protein-coding	cl4	3778
CYP27C1|-|-|2q14.3|protein-coding	cl4	339761
POLQ|PRO0327|-|3q13.33|protein-coding	cl4	10721
WIPF1|PRPL-2|WAS2|WASPIP|WIP|-|2q31.1|protein-coding	cl4	7456
TM6SF2|-|-|19p13.11|protein-coding	cl4	53345
ITGA11|HsT18964|-|15q23|protein-coding	cl4	22801
SNAI2|SLUG|SLUGH|SLUGH1|SNAIL2|WS2D|-|8q11.21|protein-coding	cl4	6591
SPATA18|Mieap|SPETEX1|-|4q12|protein-coding	cl4	132671
COL1A2|OI4|-|7q21.3|protein-coding	cl4	1278
BDKRB2|B2R|BK-2|BK2|BKR2|BRB2|-|14q32.2|protein-coding	cl4	624
GALNT15|GALNACT15|GALNT13|GALNT7|GALNTL2|PIH5|pp-GalNAc-T15|-|3p25.1|protein-coding	cl4	117248
INHBB|-|-|2q14.2|protein-coding	cl4	3625
GRAMD3|NS3TP2|-|5q23.2|protein-coding	cl4	65983
ARHGEF39|C9orf100|-|9p13.3|protein-coding	cl4	84904
LPXN|LDPL|-|11q12.1|protein-coding	cl4	9404
SOCS2-AS1|-|-|12q22|ncRNA	cl4	144481
DIRAS1|Di-Ras1|GBTS1|RIG|-|19p13.3|protein-coding	cl4	148252
ECM1|URBWD|-|1q21.2|protein-coding	cl4	1893
LDB2|CLIM1|LDB-2|LDB1|-|4p15.32|protein-coding	cl4	9079
LAYN|-|-|11q23.1|protein-coding	cl4	143903
PRDM5|BCS2|PFM2|-|4q27|protein-coding	cl4	11107
COL12A1|BA209D8.1|BTHLM2|COL12A1L|DJ234P15.1|UCMD2|-|6q13-q14.1|protein-coding	cl4	1303
TCEA3|TFIIS|TFIIS.H|-|1p36.12|protein-coding	cl4	6920
ID1|ID|bHLHb24|-|20q11.21|protein-coding	cl4	3397
ENPP2|ATX|ATX-X|AUTOTAXIN|LysoPLD|NPP2|PD-IALPHA|PDNP2|-|8q24.12|protein-coding	cl4	5168
TMCO4|-|-|1p36.13|protein-coding	cl4	255104
GTSE1|B99|-|22q13.31|protein-coding	cl4	51512
STX1B|GEFSP9|STX1B1|STX1B2|-|16p11.2|protein-coding	cl4	112755
PRKAR2B|PRKAR2|RII-BETA|-|7q22.3|protein-coding	cl4	5577
TMEM200B|TTMB|-|1p35.3|protein-coding	cl4	399474
TK1|TK2|-|17q25.3|protein-coding	cl4	7083
ADAMTSL1|ADAMTSL-1|ADAMTSR1|C9orf94|PUNCTIN|-|9p22.2-p22.1|protein-coding	cl4	92949
CIDEB|-|-|14q12|protein-coding	cl4	27141
HLA-DMA|D6S222E|DMA|HLADM|RING6|-|6p21.32|protein-coding	cl4	3108
PTH1R|PFE|PTHR|PTHR1|-|3p21.31|protein-coding	cl4	5745
RASA1|CM-AVM|CMAVM|GAP|PKWS|RASA|RASGAP|p120|p120GAP|p120RASGAP|-|5q14.3|protein-coding	cl4	5921
IGFBPL1|IGFBP-RP4|IGFBPRP4|bA113O24.1|-|9p13.1|protein-coding	cl4	347252
DOCK5|-|-|8p21.2|protein-coding	cl4	80005
LOC100505942|-|-|16q22.1|ncRNA	cl4	100505942
KRTAP1-1|HB2A|KAP1.1|KAP1.1A|KAP1.1B|KAP1.6|KAP1.7|KRTAP1.1|KRTAP1A|hKAP1.7|-|17q21.2|protein-coding	cl4	81851
TRERF1|BCAR2|HSA277276|RAPA|TREP132|TReP-132|dJ139D8.5|-|6p21.1|protein-coding	cl4	55809
IL21R|CD360|NILR|-|16p12.1|protein-coding	cl4	50615
CDCA3|GRCC8|TOME-1|-|12p13.31|protein-coding	cl4	83461
JDP2|JUNDM2|-|14q24.3|protein-coding	cl4	122953
CARF|ALS2CR8|NYD-SP24|-|2q33.2|protein-coding	cl4	79800
HS3ST3A1|3-OST-3A|3OST3A1|-|17p12|protein-coding	cl4	9955
PPFIA4|-|-|1q32.1|protein-coding	cl4	8497
EYA2|EAB1|-|20q13.12|protein-coding	cl4	2139
RPH3AL|NOC2|-|17p13.3|protein-coding	cl4	9501
HTRA1|ARMD7|CADASIL2|CARASIL|HtrA|L56|ORF480|PRSS11|-|10q26.13|protein-coding	cl4	5654
KIAA1462|JCAD|-|10p11.23|protein-coding	cl4	57608
SCUBE2|CEGB1|CEGF1|CEGP1|-|11p15.4|protein-coding	cl4	57758
DST|BP240|BPA|BPAG1|CATX-15|CATX15|D6S1101|DMH|DT|EBSB2|HSAN6|MACF2|-|6p12.1|protein-coding	cl4	667
FRMD6|C14orf31|EX1|Willin|c14_5320|-|14q22.1|protein-coding	cl4	122786
HMGB2|HMG2|-|4q34.1|protein-coding	cl4	3148
CFAP44|WDR52|-|3q13.2|protein-coding	cl4	55779
TIMP3|HSMRK222|K222|K222TA2|SFD|-|22q12.3|protein-coding	cl4	7078
BCKDHB|BCKDE1B|BCKDH E1-beta|E1B|-|6q14.1|protein-coding	cl4	594
CXXC5|CF5|HSPC195|RINF|WID|-|5q31.2|protein-coding	cl4	51523
SDC1|CD138|SDC|SYND1|syndecan|-|2p24.1|protein-coding	cl4	6382
DOCK2|IMD40|-|5q35.1|protein-coding	cl4	1794
ENO3|GSD13|MSE|-|17p13.2|protein-coding	cl4	2027
BUB1|BUB1A|BUB1L|hBUB1|-|2q13|protein-coding	cl4	699
NRG1|ARIA|GGF|GGF2|HGL|HRG|HRG1|HRGA|MST131|MSTP131|NDF|NRG1-IT2|SMDF|-|8p12|protein-coding	cl4	3084
LOC90768|-|-|4q34.3|ncRNA	cl4	90768
CXCL12|IRH|PBSF|SCYB12|SDF1|TLSF|TPAR1|-|10q11.21|protein-coding	cl4	6387
SUN2|UNC84B|-|22q13.1|protein-coding	cl4	25777
TWIST1|ACS3|BPES2|BPES3|CRS|CRS1|CSO|SCS|TWIST|bHLHa38|-|7p21.1|protein-coding	cl4	7291
TFAP2C|AP2-GAMMA|ERF1|TFAP2G|hAP-2g|-|20q13.31|protein-coding	cl4	7022
OSBPL3|ORP-3|ORP3|OSBP3|-|7p15.3|protein-coding	cl4	26031
MSI2|MSI2H|-|17q22|protein-coding	cl4	124540
PAQR5|MPRG|-|15q23|protein-coding	cl4	54852
PLXNC1|CD232|PLXN-C1|VESPR|-|12q22|protein-coding	cl4	10154
WDR62|C19orf14|MCPH2|-|19q13.12|protein-coding	cl4	284403
ADD2|ADDB|-|2p13.3|protein-coding	cl4	119
EMP2|XMP|-|16p13.13|protein-coding	cl4	2013
PLCD3|PLC-delta-3|-|17q21.31|protein-coding	cl4	113026
NTRK3|GP145-TrkC|TRKC|gp145(trkC)|-|15q25.3|protein-coding	cl4	4916
PSG4|PSBG-4|PSBG-9|PSG9|-|19q13.31|protein-coding	cl4	5672
TROAP|TASTIN|-|12q13.12|protein-coding	cl4	10024
CCNA2|CCN1|CCNA|-|4q27|protein-coding	cl4	890
SEPT11|-|-|4q21.1|protein-coding	cl4	55752
LYPD6|-|-|2q23.2|protein-coding	cl4	130574
RNF112|BFP|ZNF179|-|17p11.2|protein-coding	cl4	7732
NCF2|NCF-2|NOXA2|P67-PHOX|P67PHOX|-|1q25.3|protein-coding	cl4	4688
ANK1|ANK|SPH1|SPH2|-|8p11.21|protein-coding	cl4	286
PI16|CD364|CRISP9|MSMBBP|PSPBP|-|6p21.2|protein-coding	cl4	221476
HTRA3|Prsp|Tasp|-|4p16.1|protein-coding	cl4	94031
FANCB|FA2|FAAP90|FAAP95|FAB|FACB|-|Xp22.2|protein-coding	cl4	2187
PCDHB14|PCDH-BETA14|-|5q31.3|protein-coding	cl4	56122
SSC5D|S5D-SRCRB|-|19q13.42|protein-coding	cl4	284297
SSTR1|SRIF-2|SS-1-R|SS1-R|SS1R|-|14q21.1|protein-coding	cl4	6751
AK5|AK6|-|1p31.1|protein-coding	cl4	26289
C5|C5D|C5a|C5b|CPAMD4|ECLZB|-|9q33.2|protein-coding	cl4	727
COL8A1|C3orf7|-|3q12.1|protein-coding	cl4	1295
ZFYVE28|LST2|LYST2|-|4p16.3|protein-coding	cl4	57732
DES|CSM1|CSM2|LGMD2R|-|2q35|protein-coding	cl4	1674
ZBTB47|ZNF651|-|3p22.1|protein-coding	cl4	92999
TMEM106C|-|-|12q13.11|protein-coding	cl4	79022
AMACR|AMACRD|CBAS4|P504S|RACE|RM|-|5p13.2|protein-coding	cl4	23600
FNDC1|AGS8|FNDC2|MEL4B3|bA243O10.1|dJ322A24.1|-|6q25.3|protein-coding	cl4	84624
KIAA1841|-|-|2p15|protein-coding	cl4	84542
ANKDD1A|-|-|15q22.31|protein-coding	cl4	348094
OLFM1|AMY|NOE1|NOELIN1|OlfA|-|9q34.3|protein-coding	cl4	10439
FRAS1|-|-|4q21.21|protein-coding	cl4	80144
NFATC4|NF-AT3|NF-ATC4|NFAT3|-|14q12|protein-coding	cl4	4776
MXD3|BHLHC13|MAD3|MYX|-|5q35.3|protein-coding	cl4	83463
CEP126|KIAA1377|-|11q22.1|protein-coding	cl4	57562
GALNT5|GALNAC-T5|GALNACT5|-|2q24.1|protein-coding	cl4	11227
NSD2|KMT3F|KMT3G|MMSET|REIIBP|TRX5|WHS|WHSC1|-|4p16.3|protein-coding	cl4	7468
CKAP2|LB1|TMAP|se20-10|-|13q14.3|protein-coding	cl4	26586
MKI67|KIA|MIB-|MIB-1|PPP1R105|-|10q26.2|protein-coding	cl4	4288
MIAT|C22orf35|GOMAFU|LINC00066|NCRNA00066|RNCR2|lncRNA-MIAT|-|22q12.1|ncRNA	cl4	440823
ARSI|ASI|SPG66|-|5q32|protein-coding	cl4	340075
IQCH-AS1|-|-|15q23|ncRNA	cl4	100506686
PTK7|CCK-4|CCK4|-|6p21.1|protein-coding	cl4	5754
CDK19|CDC2L6|CDK11|bA346C16.3|-|6q21|protein-coding	cl4	23097
KIF20A|MKLP2|RAB6KIFL|-|5q31.2|protein-coding	cl4	10112
SYNGAP1|MRD5|RASA1|RASA5|SYNGAP|-|6p21.32|protein-coding	cl4	8831
MAMDC4|AEGP|-|9q34.3|protein-coding	cl4	158056
OLFML3|HNOEL-iso|OLF44|-|1p13.2|protein-coding	cl4	56944
LRRC6|CILD19|LRTP|TSLRP|-|8q24.22|protein-coding	cl4	23639
DLX1|-|-|2q31.1|protein-coding	cl4	1745
TSPOAP1|BZRAP1|PBR-IP|PRAX-1|PRAX1|RIM-BP1|RIMBP1|-|17q22|protein-coding	cl4	9256
OIP5|5730547N13Rik|CT86|LINT-25|MIS18B|MIS18beta|hMIS18beta|-|15q15.1|protein-coding	cl4	11339
GNG2|-|-|14q22.1|protein-coding	cl4	54331
TYMS|HST422|TMS|TS|-|18p11.32|protein-coding	cl4	7298
THRA|AR7|CHNG6|EAR7|ERB-T-1|ERBA|ERBA1|NR1A1|THRA1|THRA2|c-ERBA-1|-|17q21.1|protein-coding	cl4	7067
SEMA3B|LUCA-1|SEMA5|SEMAA|SemA|semaV|-|3p21.31|protein-coding	cl4	7869
PLEKHG4B|-|-|5p15.33|protein-coding	cl4	153478
DBP|DABP|-|19q13.33|protein-coding	cl4	1628
NUSAP1|ANKT|BM037|LNP|NUSAP|PRO0310p1|Q0310|SAPL|-|15q15.1|protein-coding	cl4	51203
C5orf30|-|-|5q21.1|protein-coding	cl4	90355
LOC100130417|-|-|1p36.33|ncRNA	cl4	100130417
ADRA1B|ADRA1|ALPHA1BAR|-|5q33.3|protein-coding	cl4	147
PPIEL|PPIEP1|-|1p34.3|pseudo	cl4	728448
FAM19A5|QLLK5208|TAFA-5|TAFA5|UNQ5208|-|22q13.32|protein-coding	cl4	25817
GRAMD1B|-|-|11q24.1|protein-coding	cl4	57476
PODXL|Gp200|PC|PCLP|PCLP-1|-|7q32.3|protein-coding	cl4	5420
GFRA1|GDNFR|GDNFRA|GFR-ALPHA-1|RET1L|RETL1|TRNR1|-|10q25.3|protein-coding	cl4	2674
PRRT2|BFIC2|BFIS2|DSPB3|DYT10|EKD1|FICCA|ICCA|IFITMD1|PKC|-|16p11.2|protein-coding	cl4	112476
LINC00517|C14orf26|-|14q21.1|ncRNA	cl4	400208
HCFC1R1|HPIP|-|16p13.3|protein-coding	cl4	54985
S100A3|S100E|-|1q21.3|protein-coding	cl4	6274
RHBDL2|RRP2|-|1p34.3|protein-coding	cl4	54933
AKR1E2|AKR1CL2|AKRDC1|LoopADR|hTSP|htAKR|-|10p15.1|protein-coding	cl4	83592
EXTL1|EXTL|-|1p36.11|protein-coding	cl4	2134
AGAP11|-|-|10q23.2|protein-coding	cl4	119385
ADRA1D|ADRA1|ADRA1A|ADRA1R|ALPHA1|DAR|dJ779E11.2|-|20p13|protein-coding	cl4	146
SOCS2|CIS2|Cish2|SOCS-2|SSI-2|SSI2|STATI2|-|12q22|protein-coding	cl4	8835
SENP7|-|-|3q12.3|protein-coding	cl4	57337
HOXC4|HOX3|HOX3E|cp19|-|12q13.13|protein-coding	cl4	3221
MXRA8|-|-|1p36.33|protein-coding	cl4	54587
ITGBL1|OSCP|TIED|-|13q33.1|protein-coding	cl4	9358
PPP1R3C|PPP1R5|PTG|-|10q23.32|protein-coding	cl4	5507
ADAMTSL4|ADAMTSL-4|ECTOL2|TSRC1|-|1q21.2|protein-coding	cl4	54507
RACGAP1|CYK4|HsCYK-4|ID-GAP|MgcRacGAP|-|12q13.12|protein-coding	cl4	29127
ZNF662|-|-|3p22.1|protein-coding	cl4	389114
CRABP2|CRABP-II|RBP6|-|1q23.1|protein-coding	cl4	1382
TTK|CT96|ESK|MPH1|MPS1|MPS1L1|PYT|-|6q14.1|protein-coding	cl4	7272
DSP|DCWHKTA|DP|-|6p24.3|protein-coding	cl4	1832
OLFML2B|-|-|1q23.3|protein-coding	cl4	25903
MRGPRF|GPR140|GPR168|MRGF|RTA|-|11q13.3|protein-coding	cl4	116535
ROBO2|SAX3|-|3p12.3|protein-coding	cl4	6092
KIF7|ACLS|AGBK|HLS2|JBTS12|UNQ340|-|15q26.1|protein-coding	cl4	374654
GCNT1|C2GNT|C2GNT-L|C2GNT1|G6NT|NACGT2|NAGCT2|-|9q21.13|protein-coding	cl4	2650
XG|PBDX|-|Xp22.33|protein-coding	cl4	7499
KCNQ5|Kv7.5|-|6q13|protein-coding	cl4	56479
MAMLD1|CG1|CXorf6|F18|HYSP2|-|Xq28|protein-coding	cl4	10046
QPCT|GCT|QC|sQC|-|2p22.2|protein-coding	cl4	25797
CTSZ|CTSX|-|20q13.32|protein-coding	cl4	1522
LRRC2|-|-|3p21.31|protein-coding	cl4	79442
KAZN|KAZ|-|1p36.21|protein-coding	cl4	23254
BDKRB1|B1BKR|B1R|BDKRB2|BKB1R|BKR1|BRADYB1|-|14q32.2|protein-coding	cl4	623
CEP55|C10orf3|CT111|URCC6|-|10q23.33|protein-coding	cl4	55165
BEND6|C6orf65|-|6p12.1|protein-coding	cl4	221336
SYNE2|EDMD5|NUA|NUANCE|Nesp2|Nesprin-2|SYNE-2|TROPH|-|14q23.2|protein-coding	cl4	23224
S100A2|CAN19|S100L|-|1q21.3|protein-coding	cl4	6273
NDN|HsT16328|PWCR|-|15q11.2|protein-coding	cl4	4692
CEP128|C14orf145|C14orf61|LEDP/132|-|14q31.1|protein-coding	cl4	145508
CLEC2B|AICL|CLECSF2|HP10085|IFNRG1|-|12p13.31|protein-coding	cl4	9976
RCAN1|ADAPT78|CSP1|DSC1|DSCR1|MCIP1|RCN1|-|21q22.12|protein-coding	cl4	1827
PSG9|PS34|PSBG-11|PSBG-9|PSG11|PSGII|-|19q13.31|protein-coding	cl4	5678
NTNG1|Lmnt1|-|1p13.3|protein-coding	cl4	22854
NUDT1|MTH1|-|7p22.3|protein-coding	cl4	4521
NRM|NRM29|-|6p21.33|protein-coding	cl4	11270
DNM1|DNM|EIEE31|-|9q34.11|protein-coding	cl4	1759
PIF1|C15orf20|PIF|-|15q22.31|protein-coding	cl4	80119
PLEKHA6|PEPP-3|PEPP3|-|1q32.1|protein-coding	cl4	22874
FAM13A-AS1|FAM13A1OS|FAM13AOS|NCRNA00039|-|4q22.1|ncRNA	cl4	285512
HHIPL1|KIAA1822|UNQ9245|-|14q32.2|protein-coding	cl4	84439
PHF1|MTF2L2|PCL1|PHF2|TDRD19C|hPHF1|-|6p21.32|protein-coding	cl4	5252
KIRREL3|KIRRE|MRD4|NEPH2|PRO4502|-|11q24.2|protein-coding	cl4	84623
CDC25C|CDC25|PPP1R60|-|5q31.2|protein-coding	cl4	995
FAM155A|-|-|13q33.3|protein-coding	cl4	728215
GPR85|SREB|SREB2|-|7q31.1|protein-coding	cl4	54329
NFASC|NF|NRCAML|-|1q32.1|protein-coding	cl4	23114
S100A4|18A2|42A|CAPL|FSP1|MTS1|P9KA|PEL98|-|1q21.3|protein-coding	cl4	6275
JAM2|C21orf43|CD322|JAM-B|JAMB|PRO245|VE-JAM|VEJAM|-|21q21.3|protein-coding	cl4	58494
LINC00346|C13orf29|NCRNA00346|-|13q34|ncRNA	cl4	283487
PER3|FASPS3|GIG13|-|1p36.23|protein-coding	cl4	8863
GAS1|-|-|9q21.33|protein-coding	cl4	2619
RSRP1|C1orf63|NPD014|-|1p36.11|protein-coding	cl4	57035
CLEC3B|TN|TNA|-|3p21.31|protein-coding	cl4	7123
TRIM46|GENEY|TRIFIC|-|1q22|protein-coding	cl4	80128
PKN3|UTDP4-1|-|9q34.11|protein-coding	cl4	29941
HTR2A|5-HT2A|HTR2|-|13q14.2|protein-coding	cl4	3356
APPL2|DIP13B|-|12q23.3|protein-coding	cl4	55198
SH2D4A|PPP1R38|SH2A|-|8p21.3|protein-coding	cl4	63898
BOC|CDON2|-|3q13.2|protein-coding	cl4	91653
LZTS1|F37|FEZ1|-|8p21.3|protein-coding	cl4	11178
CDKN3|CDI1|CIP2|KAP|KAP1|-|14q22.2|protein-coding	cl4	1033
SAMD11|MRS|-|1p36.33|protein-coding	cl4	148398
SUCLG2-AS1|-|-|3p14.1|ncRNA	cl4	101927111
DENND2D|-|-|1p13.3-p13.2|protein-coding	cl4	79961
COL10A1|-|-|6q22.1|protein-coding	cl4	1300
GANC|-|-|15q15.1|protein-coding	cl4	2595
CADPS|CADPS1|CAPS|CAPS1|UNC-31|-|3p14.2|protein-coding	cl4	8618
FAM109B|IPIP27B|Ses2|-|22q13.2|protein-coding	cl4	150368
KRT14|CK14|EBS3|EBS4|K14|NFJ|-|17q21.2|protein-coding	cl4	3861
KCNK2|K2p2.1|TPKC1|TREK|TREK-1|TREK1|hTREK-1c|hTREK-1e|-|1q41|protein-coding	cl4	3776
TLE2|ESG|ESG2|GRG2|-|19p13.3|protein-coding	cl4	7089
MELTF-AS1|MFI2-AS1|-|3q29|ncRNA	cl4	100507057
PLCE1|NPHS3|PLCE|PPLC|-|10q23.33|protein-coding	cl4	51196
KNL1|AF15Q14|CASC5|CT29|D40|MCPH4|PPP1R55|Spc7|hKNL-1|hSpc105|-|15q15.1|protein-coding	cl4	57082
PLEKHG4|ARHGEF44|PRTPHN1|SCA4|-|16q22.1|protein-coding	cl4	25894
CHN1|ARHGAP2|CHN|DURS2|NC|RHOGAP2|-|2q31.1|protein-coding	cl4	1123
RIPK4|ANKK2|ANKRD3|DIK|NKRD3|PKK|PPS2|RIP4|-|21q22.3|protein-coding	cl4	54101
ITIH5|ITI-HC5|PP14776|-|10p14|protein-coding	cl4	80760
COL8A2|FECD|FECD1|PPCD|PPCD2|-|1p34.3|protein-coding	cl4	1296
EVA1A|FAM176A|TMEM166|-|2p12|protein-coding	cl4	84141
KIF15|HKLP2|KNSL7|NY-BR-62|-|3p21.31|protein-coding	cl4	56992
NTF3|HDNF|NGF-2|NGF2|NT-3|NT3|-|12p13.31|protein-coding	cl4	4908
HECW1|NEDL1|-|7p14.1-p13|protein-coding	cl4	23072
DNAH1|DNAHC1|HDHC7|HL-11|HL11|HSRF-1|XLHSRF-1|-|3p21.1|protein-coding	cl4	25981
BIRC5|API4|EPR-1|-|17q25.3|protein-coding	cl4	332
FGF7|HBGF-7|KGF|-|15q21.2|protein-coding	cl4	2252
DUSP10|MKP-5|MKP5|-|1q41|protein-coding	cl4	11221
TSPAN4|NAG-2|NAG2|TETRASPAN|TM4SF7|TSPAN-4|-|11p15.5|protein-coding	cl4	7106
EPS8L2|EPS8R2|-|11p15.5|protein-coding	cl4	64787
ATOH8|HATH6|bHLHa21|-|2p11.2|protein-coding	cl4	84913
LINC00327|NCRNA00327|-|13q12.12|ncRNA	cl4	100506697
TSHZ1|CAA|NY-CO-33|SDCCAG33|TSH1|-|18q22.3|protein-coding	cl4	10194
SCIN|-|-|7p21.3|protein-coding	cl4	85477
RUNX1T1|AML1-MTG8|AML1T1|CBFA2T1|CDR|ETO|MTG8|ZMYND2|-|8q21.3|protein-coding	cl4	862
SGCB|A3b|LGMD2E|SGC|-|4q12|protein-coding	cl4	6443
SLC22A17|24p3R|BOCT|BOIT|NGALR|NGALR2|NGALR3|hBOIT|-|14q11.2|protein-coding	cl4	51310
FMN2|-|-|1q43|protein-coding	cl4	56776
CEP83|CCDC41|NPHP18|NY-REN-58|-|12q22|protein-coding	cl4	51134
F3|CD142|TF|TFA|-|1p21.3|protein-coding	cl4	2152
TCTEX1D1|-|-|1p31.3|protein-coding	cl4	200132
EMX2OS|EMX2-AS1|NCRNA00045|-|10q26.11|ncRNA	cl4	196047
PHF19|MTF2L1|PCL3|TDRD19B|-|9q33.2|protein-coding	cl4	26147
DGKA|DAGK|DAGK1|DGK-alpha|-|12q13.2|protein-coding	cl4	1606
TMEM155|-|-|4q27|protein-coding	cl4	132332
TBCK|HSPC302|IHPRF3|TBCKL|-|4q24|protein-coding	cl4	93627
DCN|CSCD|DSPG2|PG40|PGII|PGS2|SLRR1B|-|12q21.33|protein-coding	cl4	1634
PODN|PCAN|SLRR5A|-|1p32.3|protein-coding	cl4	127435
CAMKK1|CAMKKA|-|17p13.2|protein-coding	cl4	84254
PRPS1|ARTS|CMTX5|DFN2|DFNX1|PPRibP|PRS-I|PRSI|-|Xq22.3|protein-coding	cl4	5631
IQGAP3|-|-|1q22|protein-coding	cl4	128239
TSPAN18|TSPAN|-|11p11.2|protein-coding	cl4	90139
LHX9|-|-|1q31.3|protein-coding	cl4	56956
IGDCC4|DDM36|NOPE|-|15q22.31|protein-coding	cl4	57722
NET1|ARHGEF8|NET1A|-|10p15.1|protein-coding	cl4	10276
SPAG5|DEEPEST|MAP126|hMAP126|-|17q11.2|protein-coding	cl4	10615
TMEM47|BCMP1|TM4SF10|VAB-9|-|Xp21.1|protein-coding	cl4	83604
TNFRSF11B|OCIF|OPG|PDB5|TR1|-|8q24.12|protein-coding	cl4	4982
GRIA3|GLUR-C|GLUR-K3|GLUR3|GLURC|GluA3|MRX94|-|Xq25|protein-coding	cl4	2892
RAD52|-|-|12p13.33|protein-coding	cl4	5893
C21orf58|-|-|21q22.3|protein-coding	cl4	54058
ALDH3B1|ALDH4|ALDH7|-|11q13.2|protein-coding	cl4	221
PCDHB16|ME1|PCDH-BETA16|PCDH3X|PCDHB8a|-|5q31.3|protein-coding	cl4	57717
AURKA|AIK|ARK1|AURA|BTAK|PPP1R47|STK15|STK6|STK7|-|20q13.2|protein-coding	cl4	6790
AHSA2|AHA1|Hch1|-|2p15|protein-coding	cl4	130872
NDNF|C4orf31|NORD|-|4q27|protein-coding	cl4	79625
CASC10|C10orf114|bA418C1.3|-|10p12.31|protein-coding	cl4	399726
E2F8|E2F-8|-|11p15.1|protein-coding	cl4	79733
C3orf67|-|-|3p14.2|protein-coding	cl4	200844
OXTR|OT-R|-|3p25.3|protein-coding	cl4	5021
SIM1|bHLHe14|-|6q16.3|protein-coding	cl4	6492
LINC00959|-|-|10q26.3|ncRNA	cl4	387723
RXRA|NR2B1|-|9q34.2|protein-coding	cl4	6256
H1FX-AS1|C3orf47|-|3q21.3|ncRNA	cl4	339942
ERMAP|BTN5|PRO2801|RD|SC|-|1p34.2|protein-coding	cl4	114625
HDAC5|HD5|NY-CO-9|-|17q21.31|protein-coding	cl4	10014
SLC8A1|NCX1|-|2p22.1|protein-coding	cl4	6546
NEK2|HsPK21|NEK2A|NLK1|PPP1R111|RP67|-|1q32.3|protein-coding	cl4	4751
FAM83D|C20orf129|CHICA|dJ616B8.3|-|20q11.23|protein-coding	cl4	81610
PILRB|FDFACT1|FDFACT2|-|7q22.1|protein-coding	cl4	29990
PRRX2|PMX2|PRX2|-|9q34.11|protein-coding	cl4	51450
TACC3|ERIC-1|ERIC1|-|4p16.3|protein-coding	cl4	10460
CUBN|IFCR|MGA1|gp280|-|10p13|protein-coding	cl4	8029
PINLYP|-|-|19q13.31|protein-coding	cl4	390940
IGFBP3|BP-53|IBP3|-|7p12.3|protein-coding	cl4	3486
WNT5A|hWNT5A|-|3p14.3|protein-coding	cl4	7474
NIPAL3|DJ462O23.2|NPAL3|-|1p36.11|protein-coding	cl4	57185
DAB2|DOC-2|DOC2|-|5p13.1|protein-coding	cl4	1601
LOC284454|-|-|19p13.12|ncRNA	cl4	284454
PLCB4|ARCND2|PI-PLC|-|20p12.3-p12.2|protein-coding	cl4	5332
LMNA|CDCD1|CDDC|CMD1A|CMT2B1|EMD2|FPL|FPLD|FPLD2|HGPS|IDC|LDP1|LFP|LGMD1B|LMN1|LMNC|LMNL1|MADA|PRO1|-|1q22|protein-coding	cl4	4000
CDK18|PCTAIRE|PCTAIRE3|PCTK3|-|1q32.1|protein-coding	cl4	5129
C14orf37|UT2|c14_5376|-|14q23.1|protein-coding	cl4	145407
PSRC1|DDA3|FP3214|-|1p13.3|protein-coding	cl4	84722
LINC00260|C1orf217|NCRNA00260|-|1q32.1|ncRNA	cl4	84719
COMP|EDM1|EPD1|MED|PSACH|THBS5|TSP5|-|19p13.11|protein-coding	cl4	1311
CDA|CDD|-|1p36.12|protein-coding	cl4	978
FBXO43|EMI2|ERP1|FBX43|-|8q22.2|protein-coding	cl4	286151
CADM1|BL2|IGSF4|IGSF4A|NECL2|Necl-2|RA175|ST17|SYNCAM|TSLC1|sTSLC-1|sgIGSF|synCAM1|-|11q23.3|protein-coding	cl4	23705
MUC1|ADMCKD|ADMCKD1|CA 15-3|CD227|EMA|H23AG|KL-6|MAM6|MCD|MCKD|MCKD1|MUC-1|MUC-1/SEC|MUC-1/X|MUC1/ZD|PEM|PEMT|PUM|-|1q22|protein-coding	cl4	4582
DBF4B|ASKL1|CHIFB|DRF1|ZDBF1B|-|17q21.31|17q21|protein-coding	cl4	80174
DAPK2|DRP-1|DRP1|-|15q22.31|protein-coding	cl4	23604
PLPP4|DPPL2|PPAPDC1|PPAPDC1A|-|10q26.12|protein-coding	cl4	196051
MINOS1-NBL1|C1orf151-NBL1|-|1p36.13|protein-coding	cl4	100532736
LYPD6B|CT116|LYPD7|-|2q23.2|protein-coding	cl4	130576
IL11RA|CRSDA|-|9p13.3|protein-coding	cl4	3590
PSG5|FL-NCA-3|PSG|-|19q13.31|protein-coding	cl4	5673
PNPLA3|ADPN|C22orf20|iPLA(2)epsilon|-|22q13.31|protein-coding	cl4	80339
GREM2|CKTSF1B2|DAND3|PRDC|-|1q43|protein-coding	cl4	64388
LINC00565|-|-|13q34|ncRNA	cl4	100861555
NEMP1|TMEM194|TMEM194A|-|12q13.3|protein-coding	cl4	23306
CRIP1|CRHP|CRIP|CRP-1|CRP1|-|14q32.33|protein-coding	cl4	1396
LRP4|CLSS|CMS17|LRP-4|LRP10|MEGF7|SOST2|-|11p11.2|protein-coding	cl4	4038
LBH|-|-|2p23.1|protein-coding	cl4	81606
AFF2|FMR2|FMR2P|FRAXE|MRX2|OX19|-|Xq28|protein-coding	cl4	2334
TGFBI|BIGH3|CDB1|CDG2|CDGG1|CSD|CSD1|CSD2|CSD3|EBMD|LCD1|-|5q31.1|protein-coding	cl4	7045
PHYHD1|-|-|9q34.11|protein-coding	cl4	254295
ARHGAP11B|B'-T|FAM7B1|-|15q13.2|protein-coding	cl4	89839
ASPM|ASP|Calmbp1|MCPH5|-|1q31.3|protein-coding	cl4	259266
BAALC|-|-|8q22.3|protein-coding	cl4	79870
LINC00707|-|-|10p14|ncRNA	cl4	100507127
NYNRIN|CGIN1|KIAA1305|-|14q12|protein-coding	cl4	57523
RDH10|SDR16C4|-|8q21.11|protein-coding	cl4	157506
ZNF846|-|-|19p13.2|protein-coding	cl4	162993
CENPI|CENP-I|FSHPRH1|LRPR1|-|Xq22.1|protein-coding	cl4	2491
MC1R|CMM5|MSH-R|SHEP2|-|16q24.3|protein-coding	cl4	4157
ACBD7|bA455B2.2|-|10p13|protein-coding	cl4	414149
NR1D1|EAR1|THRA1|THRAL|ear-1|hRev|-|17q21.1|protein-coding	cl4	9572
LINC01204|-|-|Xp11.3|ncRNA	cl4	101927528
FAM64A|CATS|RCS1|-|17p13.2|protein-coding	cl4	54478
SLC1A2|EAAT2|EIEE41|GLT-1|HBGT|-|11p13|protein-coding	cl4	6506
C16orf95|-|-|16q24.2|protein-coding	cl4	100506581
TSPAN11|VSSW1971|-|12p11.21|protein-coding	cl4	441631
NCAM1|CD56|MSK39|NCAM|-|11q23.2|protein-coding	cl4	4684
PITPNM3|ACKR6|CORD5|NIR1|RDGBA3|-|17p13.2-p13.1|protein-coding	cl4	83394
ALPK2|HAK|-|18q21.31-q21.32|protein-coding	cl4	115701
HR|ALUNC|AU|HSA277165|HYPT4|MUHH|MUHH1|-|8p21.3|protein-coding	cl4	55806
ALDH7A1|ATQ1|EPD|PDE|-|5q23.2|protein-coding	cl4	501
RPL13P5|RPL13-2|RPL13L|RPL13_4_1199|RRPL13L|-|12p13.31|pseudo	cl4	283345
ADGRD1|GPR133|PGR25|-|12q24.33|protein-coding	cl4	283383
LINC00654|-|-|20p12.3|ncRNA	cl4	149837
ROM1|ROM|ROSP1|RP7|TSPAN23|-|11q12.3|protein-coding	cl4	6094
TWIST2|AMS|BBRSAY|DERMO1|FFDD3|SETLSS|bHLHa39|-|2q37.3|protein-coding	cl4	117581
RUNX2|AML3|CBF-alpha-1|CBFA1|CCD|CCD1|CLCD|OSF-2|OSF2|PEA2aA|PEBP2aA|-|6p21.1|protein-coding	cl4	860
RECK|ST15|-|9p13.3|protein-coding	cl4	8434
FMOD|FM|SLRR2E|-|1q32.1|protein-coding	cl4	2331
GALM|BLOCK25|GLAT|HEL-S-63p|IBD1|-|2p22.1|protein-coding	cl4	130589
LOC100288152|-|-|5p15.33|ncRNA	cl4	100288152
H1F0|H10|H1FV|-|22q13.1|protein-coding	cl4	3005
ELN|SVAS|WBS|WS|-|7q11.23|protein-coding	cl4	2006
HMMR|CD168|IHABP|RHAMM|-|5q34|protein-coding	cl4	3161
TEF|-|-|22q13.2|protein-coding	cl4	7008
ZNF521|EHZF|Evi3|-|18q11.2|protein-coding	cl4	25925
TLN2|ILWEQ|-|15q22.2|protein-coding	cl4	83660
RIPK3|RIP3|-|14q12|protein-coding	cl4	11035
TMEM246|C9orf125|-|9q31.1|protein-coding	cl4	84302
SERPING1|C1IN|C1INH|C1NH|HAE1|HAE2|-|11q12.1|protein-coding	cl4	710
MTMR11|CRA|-|1q21.2|protein-coding	cl4	10903
CDKN2C|INK4C|p18|p18-INK4C|-|1p32.3|protein-coding	cl4	1031
F8|AHF|DXS1253E|F8B|F8C|FVIII|HEMA|-|Xq28|protein-coding	cl4	2157
MATN2|-|-|8q22.1-q22.2|protein-coding	cl4	4147
RIMS1|CORD7|RAB3IP2|RIM|RIM1|-|6q13|protein-coding	cl4	22999
GAS6|AXLLG|AXSF|-|13q34|protein-coding	cl4	2621
MEG9|LINC00584|-|14q32.31|ncRNA	cl4	100507257
NBL1|D1S1733E|DAN|DAND1|NB|NO3|-|1p36.13|protein-coding	cl4	4681
MET|AUTS9|DFNB97|HGFR|RCCP2|c-Met|-|7q31.2|protein-coding	cl4	4233
TRIM14|-|-|9q22.33|protein-coding	cl4	9830
CD109|CPAMD7|p180|r150|-|6q13|protein-coding	cl4	135228
VSTM4|C10orf72|-|10q11.23|protein-coding	cl4	196740
CYP26B1|CYP26A2|P450RAI-2|P450RAI2|RHFCA|-|2p13.2|protein-coding	cl4	56603
LINC01013|-|-|6q23.2|ncRNA	cl4	100507254
VKORC1|EDTP308|MST134|MST576|VKCFD2|VKOR|-|16p11.2|protein-coding	cl4	79001
PCDH18|PCDH68L|-|4q28.3|protein-coding	cl4	54510
RFX8|-|-|2q11.2|protein-coding	cl4	731220
HERC3|-|-|4q22.1|protein-coding	cl4	8916
STMN1|C1orf215|LAP18|Lag|OP18|PP17|PP19|PR22|SMN|-|1p36.11|protein-coding	cl4	3925
KIF20B|CT90|KRMP1|MPHOSPH1|MPP-1|MPP1|-|10q23.31|protein-coding	cl4	9585
CIT|CITK|CRIK|MCPH17|STK21|-|12q24.23|protein-coding	cl4	11113
PRKD1|PKC-MU|PKCM|PKD|PRKCM|-|14q12|protein-coding	cl4	5587
GNRH1|GNRH|GRH|LHRH|LNRH|-|8p21.2|protein-coding	cl4	2796
SPEF2|CT122|KPL2|-|5p13.2|protein-coding	cl4	79925
PYROXD2|C10orf33|FP3420|-|10q24.2|protein-coding	cl4	84795
IL7R|CD127|CDW127|IL-7R-alpha|IL7RA|ILRA|-|5p13.2|protein-coding	cl4	3575
CD68|GP110|LAMP4|SCARD1|-|17p13.1|protein-coding	cl4	968
LOC101928034|-|-|1q21.3|ncRNA	cl4	101928034
LOC155060|-|-|7q36.1|pseudo	cl4	155060
ANLN|FSGS8|Scraps|scra|-|7p14.2|protein-coding	cl4	54443
POC1A|PIX2|SOFT|WDR51A|-|3p21.2|protein-coding	cl4	25886
NUF2|CDCA1|CT106|NUF2R|-|1q23.3|protein-coding	cl4	83540
SCN8A|BFIS5|CERIII|CIAT|EIEE13|MED|NaCh6|Nav1.6|PN4|-|12q13.13|protein-coding	cl4	6334
KIF22|A-328A3.2|KID|KNSL4|OBP|OBP-1|OBP-2|SEMDJL2|-|16p11.2|protein-coding	cl4	3835
DLGAP5|DLG7|HURP|-|14q22.3|protein-coding	cl4	9787
AMT|GCE|GCST|GCVT|NKH|-|3p21.31|protein-coding	cl4	275
GAS2L3|G2L3|-|12q23.1|protein-coding	cl4	283431
TNFRSF19|TAJ|TAJ-alpha|TRADE|TROY|-|13q12.12|protein-coding	cl4	55504
KIAA1456|C8orf79|TRM9L|-|8p22|protein-coding	cl4	57604
ACACB|ACC2|ACCB|HACC275|-|12q24.11|protein-coding	cl4	32
PMEPA1|STAG1|TMEPAI|-|20q13.31|protein-coding	cl4	56937
GATA2-AS1|-|-|3q21.3|ncRNA	cl4	101927167
C1QTNF2|CTRP2|zacrp2|-|5q33.3|protein-coding	cl4	114898
PODNL1|SLRR5B|-|19p13.12|protein-coding	cl4	79883
CCDC191|KIAA1407|-|3q13.31|protein-coding	cl4	57577
LRP11|MANSC3|bA350J20.3|-|6q25.1|protein-coding	cl4	84918
KIAA1217|SKT|-|10p12.2-p12.1|protein-coding	cl4	56243
PENK|PE|PENK-A|-|8q12.1|protein-coding	cl4	5179
PAM|PAL|PHM|-|5q21.1|protein-coding	cl4	5066
MYBL1|A-MYB|AMYB|-|8q13.1|protein-coding	cl4	4603
NEK11|-|-|3q22.1|protein-coding	cl4	79858
EFS|CAS3|CASS3|EFS1|EFS2|HEFS|SIN|-|14q11.2|protein-coding	cl4	10278
PTGFR|FP|-|1p31.1|protein-coding	cl4	5737
STMN2|SCG10|SCGN10|-|8q21.13|protein-coding	cl4	11075
NLRC5|CLR16.1|NOD27|NOD4|-|16q13|protein-coding	cl4	84166
LRRCC1|CLERC|SAP2|VFL1|-|8q21.2|protein-coding	cl4	85444
P2RX6|P2RXL1|P2X6|P2XM|-|22q11.21|protein-coding	cl4	9127
MIR4800|mir-4800|-|4p16.3|ncRNA	cl4	100616358
ADCY7|AC7|-|16q12.1|protein-coding	cl4	113
PLXNB3|PLEXB3|PLEXR|PLXN6|-|Xq28|protein-coding	cl4	5365
SPTBN5|BSPECV|HUBSPECV|HUSPECV|-|15q15.1|protein-coding	cl4	51332
HLA-DPB1|DPB1|HLA-DP|HLA-DP1B|HLA-DPB|-|6p21.32|protein-coding	cl4	3115
KIFC1|HSET|KNSL2|-|6p21.32|protein-coding	cl4	3833
NACAD|-|-|7p13|protein-coding	cl4	23148
C16orf45|MINP|-|16p13.11|protein-coding	cl4	89927
FAT1|CDHF7|CDHR8|FAT|ME5|hFat1|-|4q35.2|protein-coding	cl4	2195
DKK3|REIC|RIG|-|11p15.3|protein-coding	cl4	27122
SKA3|C13orf3|RAMA1|-|13q12.11|protein-coding	cl4	221150
CCDC85A|-|-|2p16.1|protein-coding	cl4	114800
SERPINB7|MEGSIN|PPKN|TP55|-|18q21.33|protein-coding	cl4	8710
AHNAK2|C14orf78|-|14q32.33|protein-coding	cl4	113146
GALT|-|-|9p13.3|protein-coding	cl4	2592
SGO2|SGOL2|TRIPIN|-|2q33.1|protein-coding	cl4	151246
ABCC3|ABC31|EST90757|MLP2|MOAT-D|MRP3|cMOAT2|-|17q21.33|protein-coding	cl4	8714
C16orf86|-|-|16q22.1|protein-coding	cl4	388284
CNPY4|PRAT4B|-|7q22.1|protein-coding	cl4	245812
MMP19|CODA|MMP18|RASI-1|-|12q13.2|protein-coding	cl4	4327
CNTRL|CEP1|CEP110|FAN|bA165P4.1|-|9q33.2|protein-coding	cl4	11064
FAM46A|C6orf37|XTP11|-|6q14.1|protein-coding	cl4	55603
SAPCD2|C9orf140|p42.3|-|9q34.3|protein-coding	cl4	89958
GPSM2|CMCS|DFNB82|LGN|PINS|-|1p13.3|protein-coding	cl4	29899
CH25H|C25H|-|10q23.31|protein-coding	cl4	9023
C11orf45|-|-|11q24.3|protein-coding	cl4	219833
CCDC18|NY-SAR-41|-|1p22.1|protein-coding	cl4	343099
SCARA3|APC7|CSR|CSR1|MSLR1|MSRL1|-|8p21.1|protein-coding	cl4	51435
GAS6-AS2|-|-|13q34|ncRNA	cl4	100506394
GPER1|CEPR|CMKRL2|DRY12|FEG-1|GPCR-Br|GPER|GPR30|LERGU|LERGU2|LyGPR|mER|-|7p22.3|protein-coding	cl4	2852
FLRT2|-|-|14q31.3|protein-coding	cl4	23768
SORCS2|-|-|4p16.1|protein-coding	cl4	57537
TOP2A|TOP2|TP2A|-|17q21.2|protein-coding	cl4	7153
SLC38A4|ATA3|NAT3|PAAT|SNAT4|-|12q13.11|protein-coding	cl4	55089
PDE4B|DPDE4|PDEIVB|-|1p31.3|protein-coding	cl4	5142
MTMR9LP|MTMR9L|-|1p35.2|pseudo	cl4	339483
LOC100129434|-|-|2p16.1|ncRNA	cl4	100129434
GPR68|AI2A6|GPR12A|OGR1|-|14q32.11|protein-coding	cl4	8111
NREP|C5orf13|D4S114|P311|PRO1873|PTZ17|SEZ17|-|5q22.1|protein-coding	cl4	9315
ISLR|HsT17563|Meflin|-|15q24.1|protein-coding	cl4	3671
REV3L|POLZ|REV3|-|6q21|protein-coding	cl4	5980
DKK1|DKK-1|SK|-|10q21.1|protein-coding	cl4	22943
TNFRSF6B|DCR3|DJ583P15.1.1|M68|M68E|TR6|-|20q13.33|protein-coding	cl4	8771
TSHZ2|C20orf17|OVC10-2|TSH2|ZABC2|ZNF218|-|20q13.2|protein-coding	cl4	128553
NDC80|HEC|HEC1|HsHec1|KNTC2|TID3|hsNDC80|-|18p11.32|protein-coding	cl4	10403
DCLK2|CL2|CLICK-II|CLICK2|CLIK2|DCAMKL2|DCDC3|DCDC3B|DCK2|-|4q31.23-q31.3|protein-coding	cl4	166614
PTN|HARP|HB-GAM|HBBM|HBGF-8|HBGF8|HBNF|HBNF-1|NEGF1|OSF-1|-|7q33|protein-coding	cl4	5764
SPDL1|CCDC99|-|5q35.1|protein-coding	cl4	54908
DMC1|DMC1H|LIM15|dJ199H16.1|-|22q13.1|protein-coding	cl4	11144
TCF4|E2-2|FECD3|ITF-2|ITF2|PTHS|SEF-2|SEF2|SEF2-1|SEF2-1A|SEF2-1B|SEF2-1D|TCF-4|bHLHb19|-|18q21.2|protein-coding	cl4	6925
STAG3L5P-PVRIG2P-PILRB|LOC101735302-LOC101752334-PILRB|-|7q22.1|ncRNA	cl4	101752399
PCSK1|BMIQ12|NEC1|PC1|PC3|SPC3|-|5q15|protein-coding	cl4	5122
SFRP2|FRP-2|SARP1|SDF-5|-|4q31.3|protein-coding	cl4	6423
SGCD|35DAG|CMD1L|DAGD|SG-delta|SGCDP|SGD|-|5q33.2-q33.3|protein-coding	cl4	6444
CKB|B-CK|BCK|CKBB|HEL-211|HEL-S-29|-|14q32.33|protein-coding	cl4	1152
MMP3|CHDS6|MMP-3|SL-1|STMY|STMY1|STR1|-|11q22.2|protein-coding	cl4	4314
MXRA5|-|-|Xp22.33|protein-coding	cl4	25878
ATP8B3|ATPIK|-|19p13.3|protein-coding	cl4	148229
TTLL3|HOTTL|-|3p25.3|protein-coding	cl4	26140
UBE2Q2P1|UBE2QP1|-|15q25.2|pseudo	cl4	388165
MFAP5|AAT9|MAGP-2|MAGP2|MFAP-5|MP25|-|12p13.31|protein-coding	cl4	8076
CCDC150|-|-|2q33.1|protein-coding	cl4	284992
FAM65B|C6orf32|DFNB104|DIFF40|DIFF48|MYONAP|PL48|-|6p22.3|protein-coding	cl4	9750
MFAP4|-|-|17p11.2|protein-coding	cl4	4239
ARNT2|WEDAS|bHLHe1|-|15q25.1|protein-coding	cl4	9915
PDZRN3|LNX3|SEMACAP3|SEMCAP3|-|3p13|protein-coding	cl4	23024
CENPF|CENF|CILD31|PRO1779|STROMS|hcp-1|-|1q41|protein-coding	cl4	1063
PBK|CT84|HEL164|Nori-3|SPK|TOPK|-|8p21.1|protein-coding	cl4	55872
C1QTNF3|C1ATNF3|CORCS|CORS|CORS-26|CORS26|CTRP3|-|5p13.2|protein-coding	cl4	114899
LINC00856|-|-|10q22.3|ncRNA	cl4	100132987
HSD3B7|CBAS1|PFIC4|SDR11E3|-|16p11.2|protein-coding	cl4	80270
VEGFC|Flt4-L|LMPH1D|VRP|-|4q34.3|protein-coding	cl4	7424
KNSTRN|C15orf23|HSD11|SKAP|TRAF4AF1|-|15q15.1|protein-coding	cl4	90417
MIR1825|MIRN1825|hsa-mir-1825|-|20q11.21|ncRNA	cl4	100302183
THY1|CD90|CDw90|-|11q23.3|protein-coding	cl4	7070
SLC16A5|MCT5|MCT6|-|17q25.1|protein-coding	cl4	9121
RTTN|MSSP|-|18q22.2|protein-coding	cl4	25914
F10|FX|FXA|-|13q34|protein-coding	cl4	2159
ATP10A|ATP10C|ATPVA|ATPVC|-|15q12|protein-coding	cl4	57194
APC|BTPS2|DP2|DP2.5|DP3|GS|PPP1R46|-|5q22.2|protein-coding	cl4	324
MST1|D3F15S2|DNF15S2|HGFL|MSP|NF15S2|-|3p21.31|protein-coding	cl4	4485
NCALD|-|-|8q22.3|protein-coding	cl4	83988
C12orf75|AGD3|OCC-1|OCC1|-|12q23.3|protein-coding	cl4	387882
RARG|NR1B3|RARC|-|12q13.13|protein-coding	cl4	5916
MYOM3|-|-|1p36.11|protein-coding	cl4	127294
CDC42EP3|BORG2|CEP3|UB1|-|2p22.2|protein-coding	cl4	10602
TRIM59|IFT80L|MRF1|RNF104|TRIM57|TSBF1|-|3q25.33|protein-coding	cl4	286827
MIR503HG|H19X|MIR503HG2|-|Xq26.3|ncRNA	cl4	84848
TSPAN10|OCSP|-|17q25.3|protein-coding	cl4	83882
MFGE8|BA46|EDIL1|HMFG|HsT19888|MFG-E8|MFGM|OAcGD3S|SED1|SPAG10|hP47|-|15q26.1|protein-coding	cl4	4240
LOC105376382|-|-|10p15.1|ncRNA	cl4	105376382
THBS1|THBS|THBS-1|TSP|TSP-1|TSP1|-|15q14|protein-coding	cl4	7057
C14orf132|C14orf88|-|14q32.2|protein-coding	cl4	56967
ENPP1|ARHR2|COLED|M6S1|NPP1|NPPS|PC-1|PCA1|PDNP1|-|6q23.2|protein-coding	cl4	5167
HSPB2|HSP27|Hs.78846|LOH11CR1K|MKBP|-|11q23.1|protein-coding	cl4	3316
PSG1|B1G1|CD66f|DHFRP2|FL-NCA-1/2|PBG1|PS-beta-C/D|PS-beta-G-1|PSBG-1|PSBG1|PSG95|PSGGA|PSGIIA|SP1|-|19q13.2|protein-coding	cl4	5669
CUL9|H7AP1|PARC|-|6p21.1|protein-coding	cl4	23113
NCAPG2|CAP-G2|CAPG2|LUZP5|MTB|hCAP-G2|-|7q36.3|protein-coding	cl4	54892
CLIC3|-|-|9q34.3|protein-coding	cl4	9022
CYB561|CYB561A1|FRRS2|-|17q23.3|protein-coding	cl4	1534
LMO7|FBX20|FBXO20|LOMP|-|13q22.2|protein-coding	cl4	4008
LAMB2|LAMS|NPHS5|-|3p21.31|protein-coding	cl4	3913
MBOAT1|LPEAT1|LPLAT|LPLAT 1|LPSAT|OACT1|dJ434O11.1|-|6p22.3|protein-coding	cl4	154141
KRT34|HA4|Ha-4|KRTHA4|hHa4|-|17q21.2|protein-coding	cl4	3885
ACKR3|CMKOR1|CXC-R7|CXCR-7|CXCR7|GPR159|RDC-1|RDC1|-|2q37.3|protein-coding	cl4	57007
LRRC15|LIB|-|3q29|protein-coding	cl4	131578
LUM|LDC|SLRR2D|-|12q21.33|protein-coding	cl4	4060
COL7A1|EBD1|EBDCT|EBR1|NDNC8|-|3p21.31|protein-coding	cl4	1294
ADCY9|AC9|ACIX|-|16p13.3|protein-coding	cl4	115
SPTB|EL3|HS2|HSPTB1|SPH2|-|14q23.3|protein-coding	cl4	6710
KRTAP1-5|KAP1.5|KRTAP1.5|-|17q21.2|protein-coding	cl4	83895
DPT|TRAMP|-|1q24.2|protein-coding	cl4	1805
EMX2|-|-|10q26.11|protein-coding	cl4	2018
CCNB1|CCNB|-|5q13.2|protein-coding	cl4	891
TENM2|ODZ2|TEN-M2|TNM2|ten-2|-|5q34|protein-coding	cl4	57451
CYTH3|ARNO3|GRP1|PSCD3|cytohesin-3|-|7p22.1|protein-coding	cl4	9265
IMPA2|-|-|18p11.21|protein-coding	cl4	3613
FBLN2|-|-|3p25.1|protein-coding	cl4	2199
SNED1|SST3|Snep|-|2q37.3|protein-coding	cl4	25992
FIBCD1|-|-|9q34.12|protein-coding	cl4	84929
NEURL1B|NEURL3|hNeur2|neur2|-|5q35.1|protein-coding	cl4	54492
SMC4|CAP-C|CAPC|SMC-4|SMC4L1|-|3q25.33|protein-coding	cl4	10051
MEGF6|EGFL3|-|1p36.32|protein-coding	cl4	1953
KCNS3|KV9.3|-|2p24.2|protein-coding	cl4	3790
TENM3|MCOPCB9|ODZ3|TNM3|Ten-m3|ten-3|-|4q34.3-q35.1|protein-coding	cl4	55714
LINC01119|-|-|2p21|ncRNA	cl4	100134259
ZNF630|dJ54B20.2|-|Xp11.23|protein-coding	cl4	57232
FOXL2NB|C3orf72|-|3q22.3|protein-coding	cl4	401089
C1QTNF3-AMACR|-|-|5p13.2|ncRNA	cl4	100534612
PRR16|DSC54|LARGEN|-|5q23.1|protein-coding	cl4	51334
GRIK2|EAA4|GLR6|GLUK6|GLUR6|GluK2|MRT6|-|6q16.3|protein-coding	cl4	2898
CACNA1C|CACH2|CACN2|CACNL1A1|CCHL1A1|CaV1.2|LQT8|TS|-|12p13.33|protein-coding	cl4	775
SYNDIG1|C20orf39|DSPC2|IFITMD5|TMEM90B|-|20p11.21|protein-coding	cl4	79953
LINC00595|C10orf101|-|10q22.3|ncRNA	cl4	414243
KIF18A|MS-KIF18A|PPP1R99|-|11p14.1|protein-coding	cl4	81930
GPX7|CL683|GPX6|GPx-7|GSHPx-7|NPGPx|-|1p32.3|protein-coding	cl4	2882
SAPCD1|C6orf26|NG23|-|6p21.33|protein-coding	cl4	401251
KIF14|MKS12|-|1q32.1|protein-coding	cl4	9928
CAPS|CAPS1|-|19p13.3|protein-coding	cl4	828
AIG1|AIG-1|dJ95L4.1|-|6q24.2|protein-coding	cl4	51390
TMEM198B|-|-|12q13.2|pseudo	cl4	440104
CCDC34|L15|NY-REN-41|RAMA3|-|11p14.1|protein-coding	cl4	91057
